# Supplementary material for: The Expression Profile of Complement Components in Podocytes
Source: Int J Mol Sci. 2016 Mar 30;17(4):471. doi: 10.3390/ijms17040471 (PMC4848927; doi:10.3390/ijms17040471)
Supplement: Supplementary file 1 [file ijms-17-00471-s001.xlsx]

## Sheet: Table S1
Table S1. LC-MS/MS analysis identified 3296 proteins.
Accession	Description	Score	Coverage	# Proteins	# Unique Peptides	# Peptides	# PSMs	# AAs	MW (kDa)	calc. pI
P07724	Serum albumin OS=Mus musculus GN=Alb PE=1 SV=3 - [ALBU_MOUSE]	189.1	0.0789	1	4	4	18	608	68.6	6.07
Q9EPK7	Exportin-7 OS=Mus musculus GN=Xpo7 PE=2 SV=3 - [XPO7_MOUSE]	135.24	0.0561	1	4	4	4	1087	123.7	6.38
Q6P5F9	Exportin-1 OS=Mus musculus GN=Xpo1 PE=1 SV=1 - [XPO1_MOUSE]	787.2	0.2428	1	21	21	49	1071	123	6.07
Q91V92	ATP-citrate synthase OS=Mus musculus GN=Acly PE=1 SV=1 - [ACLY_MOUSE]	1524.48	0.4464	1	41	41	145	1091	119.7	7.44
P62267	40S ribosomal protein S23 OS=Mus musculus GN=Rps23 PE=2 SV=3 - [RS23_MOUSE]	165.52	0.3007	1	5	5	20	143	15.8	10.49
Q62018	RNA polymerase-associated protein CTR9 homolog OS=Mus musculus GN=Ctr9 PE=1 SV=2 - [CTR9_MOUSE]	22.37	0.0128	1	1	1	1	1173	133.3	6.49
Q6NXH9	Keratin, type II cytoskeletal 73 OS=Mus musculus GN=Krt73 PE=1 SV=1 - [K2C73_MOUSE]	75.51	0.0427	2	2	2	5	539	58.9	8.09
P68372	Tubulin beta-4B chain OS=Mus musculus GN=Tubb4b PE=1 SV=1 - [TBB4B_MOUSE]	1263.06	0.7371	1	3	26	342	445	49.8	4.89
P99024	Tubulin beta-5 chain OS=Mus musculus GN=Tubb5 PE=1 SV=1 - [TBB5_MOUSE]	1363.47	0.7387	1	5	27	408	444	49.6	4.89
Q9CWF2	Tubulin beta-2B chain OS=Mus musculus GN=Tubb2b PE=1 SV=1 - [TBB2B_MOUSE]	1092.32	0.6629	2	3	24	309	445	49.9	4.89
P62737	Actin, aortic smooth muscle OS=Mus musculus GN=Acta2 PE=1 SV=1 - [ACTA_MOUSE]	1025.96	0.679	2	9	25	652	377	42	5.39
P60710	Actin, cytoplasmic 1 OS=Mus musculus GN=Actb PE=1 SV=1 - [ACTB_MOUSE]	1422.77	0.6853	2	10	27	1224	375	41.7	5.48
P63242	Eukaryotic translation initiation factor 5A-1 OS=Mus musculus GN=Eif5a PE=1 SV=2 - [IF5A1_MOUSE]	472.74	0.5584	2	9	9	74	154	16.8	5.24
Q63810	Calcineurin subunit B type 1 OS=Mus musculus GN=Ppp3r1 PE=1 SV=3 - [CANB1_MOUSE]	63.68	0.1059	1	2	2	3	170	19.3	4.81
P62245	40S ribosomal protein S15a OS=Mus musculus GN=Rps15a PE=2 SV=2 - [RS15A_MOUSE]	259.49	0.5692	1	8	8	24	130	14.8	10.13
P61089	Ubiquitin-conjugating enzyme E2 N OS=Mus musculus GN=Ube2n PE=1 SV=1 - [UBE2N_MOUSE]	240.31	0.5329	1	8	8	40	152	17.1	6.57
P62259	14-3-3 protein epsilon OS=Mus musculus GN=Ywhae PE=1 SV=1 - [1433E_MOUSE]	871.95	0.6392	1	17	19	207	255	29.2	4.74
P61982	14-3-3 protein gamma OS=Mus musculus GN=Ywhag PE=1 SV=2 - [1433G_MOUSE]	735.48	0.7733	2	12	17	135	247	28.3	4.89
P62858	40S ribosomal protein S28 OS=Mus musculus GN=Rps28 PE=2 SV=1 - [RS28_MOUSE]	130.21	0.3623	1	3	3	26	69	7.8	10.7
P63001	Ras-related C3 botulinum toxin substrate 1 OS=Mus musculus GN=Rac1 PE=1 SV=1 - [RAC1_MOUSE]	223.48	0.2917	3	6	6	33	192	21.4	8.5
P84096	Rho-related GTP-binding protein RhoG OS=Mus musculus GN=Rhog PE=2 SV=1 - [RHOG_MOUSE]	98.81	0.2513	1	3	3	4	191	21.3	8.12
P62743	AP-2 complex subunit sigma OS=Mus musculus GN=Ap2s1 PE=1 SV=1 - [AP2S1_MOUSE]	79.63	0.1972	1	3	3	6	142	17	6.18
P62301	40S ribosomal protein S13 OS=Mus musculus GN=Rps13 PE=2 SV=2 - [RS13_MOUSE]	300.49	0.5828	1	10	10	34	151	17.2	10.54
Q3THE2	Myosin regulatory light chain 12B OS=Mus musculus GN=Myl12b PE=1 SV=2 - [ML12B_MOUSE]	401.26	0.4593	1	5	9	37	172	19.8	4.84
P62900	60S ribosomal protein L31 OS=Mus musculus GN=Rpl31 PE=2 SV=1 - [RL31_MOUSE]	249.84	0.392	1	7	7	30	125	14.5	10.54
P60229	Eukaryotic translation initiation factor 3 subunit E OS=Mus musculus GN=Eif3e PE=1 SV=1 - [EIF3E_MOUSE]	515.23	0.3483	1	11	11	26	445	52.2	6.04
Q60605	Myosin light polypeptide 6 OS=Mus musculus GN=Myl6 PE=1 SV=3 - [MYL6_MOUSE]	402.45	0.5232	2	8	8	78	151	16.9	4.65
P60843	Eukaryotic initiation factor 4A-I OS=Mus musculus GN=Eif4a1 PE=1 SV=1 - [IF4A1_MOUSE]	880.35	0.5862	1	11	20	128	406	46.1	5.48
P10630	Eukaryotic initiation factor 4A-II OS=Mus musculus GN=Eif4a2 PE=2 SV=2 - [IF4A2_MOUSE]	513.7	0.317	1	2	11	91	407	46.4	5.48
P51150	Ras-related protein Rab-7a OS=Mus musculus GN=Rab7a PE=1 SV=2 - [RAB7A_MOUSE]	507.3	0.6522	1	12	12	46	207	23.5	6.7
P61021	Ras-related protein Rab-5B OS=Mus musculus GN=Rab5b PE=1 SV=1 - [RAB5B_MOUSE]	154	0.2558	1	2	4	10	215	23.7	8.13
P62082	40S ribosomal protein S7 OS=Mus musculus GN=Rps7 PE=2 SV=1 - [RS7_MOUSE]	422.29	0.4381	1	10	10	73	194	22.1	10.1
P68369	Tubulin alpha-1A chain OS=Mus musculus GN=Tuba1a PE=1 SV=1 - [TBA1A_MOUSE]	1399.82	0.643	3	3	24	446	451	50.1	5.06
P84091	AP-2 complex subunit mu OS=Mus musculus GN=Ap2m1 PE=1 SV=1 - [AP2M1_MOUSE]	232.56	0.1885	1	6	6	11	435	49.6	9.54
Q9D7G0	Ribose-phosphate pyrophosphokinase 1 OS=Mus musculus GN=Prps1 PE=1 SV=4 - [PRPS1_MOUSE]	302.6	0.3302	1	2	8	27	318	34.8	6.98
P62889	60S ribosomal protein L30 OS=Mus musculus GN=Rpl30 PE=2 SV=2 - [RL30_MOUSE]	234.67	0.4783	1	6	6	23	115	12.8	9.63
P62071	Ras-related protein R-Ras2 OS=Mus musculus GN=Rras2 PE=1 SV=1 - [RRAS2_MOUSE]	176.04	0.2304	1	2	4	11	204	23.4	6.01
P62242	40S ribosomal protein S8 OS=Mus musculus GN=Rps8 PE=2 SV=2 - [RS8_MOUSE]	393.09	0.5288	1	10	10	51	208	24.2	10.32
P62141	Serine/threonine-protein phosphatase PP1-beta catalytic subunit OS=Mus musculus GN=Ppp1cb PE=1 SV=3 - [PP1B_MOUSE]	410.62	0.2936	1	1	10	44	327	37.2	6.19
Q99JI6	Ras-related protein Rap-1b OS=Mus musculus GN=Rap1b PE=2 SV=2 - [RAP1B_MOUSE]	281.56	0.6033	1	3	9	25	184	20.8	5.78
P61087	Ubiquitin-conjugating enzyme E2 K OS=Mus musculus GN=Ube2k PE=1 SV=3 - [UBE2K_MOUSE]	258.5	0.46	1	7	7	27	200	22.4	5.44
P62835	Ras-related protein Rap-1A OS=Mus musculus GN=Rap1a PE=2 SV=1 - [RAP1A_MOUSE]	288.79	0.4891	1	2	8	24	184	21	6.67
P61205	ADP-ribosylation factor 3 OS=Mus musculus GN=Arf3 PE=2 SV=2 - [ARF3_MOUSE]	422.79	0.674	3	6	11	75	181	20.6	7.43
Q8BNY6	Neuronal calcium sensor 1 OS=Mus musculus GN=Ncs1 PE=2 SV=3 - [NCS1_MOUSE]	37.4	0.0842	1	1	1	2	190	21.9	4.83
O08547	Vesicle-trafficking protein SEC22b OS=Mus musculus GN=Sec22b PE=1 SV=3 - [SC22B_MOUSE]	257	0.3349	1	6	6	15	215	24.7	8.51
P62746	Rho-related GTP-binding protein RhoB OS=Mus musculus GN=Rhob PE=1 SV=1 - [RHOB_MOUSE]	183.92	0.4643	1	3	5	14	196	22.1	5.24
Q62159	Rho-related GTP-binding protein RhoC OS=Mus musculus GN=Rhoc PE=1 SV=2 - [RHOC_MOUSE]	418	0.6528	1	2	9	37	193	22	6.58
P60335	Poly(rC)-binding protein 1 OS=Mus musculus GN=Pcbp1 PE=1 SV=1 - [PCBP1_MOUSE]	512.03	0.4944	1	7	12	49	356	37.5	7.09
Q01853	Transitional endoplasmic reticulum ATPase OS=Mus musculus GN=Vcp PE=1 SV=4 - [TERA_MOUSE]	1731	0.603	2	41	42	185	806	89.3	5.26
O35129	Prohibitin-2 OS=Mus musculus GN=Phb2 PE=1 SV=1 - [PHB2_MOUSE]	672.11	0.5853	1	14	14	44	299	33.3	9.83
P68368	Tubulin alpha-4A chain OS=Mus musculus GN=Tuba4a PE=1 SV=1 - [TBA4A_MOUSE]	1209.75	0.5982	2	5	21	325	448	49.9	5.06
P61079	Ubiquitin-conjugating enzyme E2 D3 OS=Mus musculus GN=Ube2d3 PE=1 SV=1 - [UB2D3_MOUSE]	129.79	0.3061	3	4	4	12	147	16.7	7.8
P62281	40S ribosomal protein S11 OS=Mus musculus GN=Rps11 PE=2 SV=3 - [RS11_MOUSE]	288.09	0.5063	1	9	9	25	158	18.4	10.3
P61971	Nuclear transport factor 2 OS=Mus musculus GN=Nutf2 PE=2 SV=1 - [NTF2_MOUSE]	157.72	0.3465	2	4	4	14	127	14.5	5.38
Q64523	Histone H2A type 2-C OS=Mus musculus GN=Hist2h2ac PE=1 SV=3 - [H2A2C_MOUSE]	264.97	0.3566	2	1	6	164	129	14	10.9
Q6PHZ2	Calcium/calmodulin-dependent protein kinase type II subunit delta OS=Mus musculus GN=Camk2d PE=1 SV=1 - [KCC2D_MOUSE]	139.42	0.1182	3	4	4	6	499	56.3	7.25
P62751	60S ribosomal protein L23a OS=Mus musculus GN=Rpl23a PE=1 SV=1 - [RL23A_MOUSE]	278.99	0.4295	1	8	8	33	156	17.7	10.45
Q80SW1	Putative adenosylhomocysteinase 2 OS=Mus musculus GN=Ahcyl1 PE=1 SV=1 - [SAHH2_MOUSE]	311.63	0.183	2	9	11	23	530	58.9	6.89
P61358	60S ribosomal protein L27 OS=Mus musculus GN=Rpl27 PE=1 SV=2 - [RL27_MOUSE]	192.79	0.4632	2	6	6	28	136	15.8	10.56
P61620	Protein transport protein Sec61 subunit alpha isoform 1 OS=Mus musculus GN=Sec61a1 PE=2 SV=2 - [S61A1_MOUSE]	185.16	0.166	1	2	5	12	476	52.2	8.06
P61979	Heterogeneous nuclear ribonucleoprotein K OS=Mus musculus GN=Hnrnpk PE=1 SV=1 - [HNRPK_MOUSE]	993.93	0.568	2	23	23	182	463	50.9	5.54
P62317	Small nuclear ribonucleoprotein Sm D2 OS=Mus musculus GN=Snrpd2 PE=1 SV=1 - [SMD2_MOUSE]	215.16	0.5339	1	7	7	21	118	13.5	9.91
P62806	Histone H4 OS=Mus musculus GN=Hist1h4a PE=1 SV=2 - [H4_MOUSE]	477.59	0.6019	1	10	10	159	103	11.4	11.36
P62754	40S ribosomal protein S6 OS=Mus musculus GN=Rps6 PE=1 SV=1 - [RS6_MOUSE]	343.48	0.3293	1	9	9	41	249	28.7	10.84
P68040	Guanine nucleotide-binding protein subunit beta-2-like 1 OS=Mus musculus GN=Gnb2l1 PE=1 SV=3 - [GBLP_MOUSE]	941.13	0.6467	1	20	20	127	317	35.1	7.69
P62264	40S ribosomal protein S14 OS=Mus musculus GN=Rps14 PE=2 SV=3 - [RS14_MOUSE]	330.32	0.3974	1	6	6	30	151	16.3	10.05
P62874	Guanine nucleotide-binding protein G(I)/G(S)/G(T) subunit beta-1 OS=Mus musculus GN=Gnb1 PE=1 SV=3 - [GBB1_MOUSE]	263.18	0.25	2	2	6	29	340	37.4	6
P62880	Guanine nucleotide-binding protein G(I)/G(S)/G(T) subunit beta-2 OS=Mus musculus GN=Gnb2 PE=1 SV=3 - [GBB2_MOUSE]	569.3	0.4265	3	7	11	51	340	37.3	6
P62204	Calmodulin OS=Mus musculus GN=Calm1 PE=1 SV=2 - [CALM_MOUSE]	266.89	0.3826	3	6	6	43	149	16.8	4.22
Q8BWY3	Eukaryotic peptide chain release factor subunit 1 OS=Mus musculus GN=Etf1 PE=1 SV=4 - [ERF1_MOUSE]	406.79	0.2815	1	10	10	25	437	49	5.71
P83882	60S ribosomal protein L36a OS=Mus musculus GN=Rpl36a PE=2 SV=2 - [RL36A_MOUSE]	85.1	0.3113	1	4	4	6	106	12.4	10.58
P59999	Actin-related protein 2/3 complex subunit 4 OS=Mus musculus GN=Arpc4 PE=1 SV=3 - [ARPC4_MOUSE]	198.35	0.2738	1	4	4	18	168	19.7	8.43
P14131	40S ribosomal protein S16 OS=Mus musculus GN=Rps16 PE=2 SV=4 - [RS16_MOUSE]	171.39	0.4041	1	6	6	18	146	16.4	10.21
P61164	Alpha-centractin OS=Mus musculus GN=Actr1a PE=2 SV=1 - [ACTZ_MOUSE]	327.62	0.375	1	3	10	24	376	42.6	6.64
Q8BP67	60S ribosomal protein L24 OS=Mus musculus GN=Rpl24 PE=2 SV=2 - [RL24_MOUSE]	175.29	0.3121	1	5	5	10	157	17.8	11.25
P97470	Serine/threonine-protein phosphatase 4 catalytic subunit OS=Mus musculus GN=Ppp4c PE=1 SV=2 - [PP4C_MOUSE]	123.14	0.127	1	2	3	5	307	35.1	5.06
P61161	Actin-related protein 2 OS=Mus musculus GN=Actr2 PE=1 SV=1 - [ARP2_MOUSE]	320.44	0.2919	1	9	10	25	394	44.7	6.74
Q6PDM2	Serine/arginine-rich splicing factor 1 OS=Mus musculus GN=Srsf1 PE=1 SV=3 - [SRSF1_MOUSE]	393.26	0.4355	1	10	11	48	248	27.7	10.36
P62702	40S ribosomal protein S4, X isoform OS=Mus musculus GN=Rps4x PE=2 SV=2 - [RS4X_MOUSE]	579.8	0.5817	1	17	17	69	263	29.6	10.15
Q6ZWV3	60S ribosomal protein L10 OS=Mus musculus GN=Rpl10 PE=2 SV=3 - [RL10_MOUSE]	276.15	0.5	2	12	12	29	214	24.6	10.08
P61961	Ubiquitin-fold modifier 1 OS=Mus musculus GN=Ufm1 PE=1 SV=1 - [UFM1_MOUSE]	63.54	0.1765	1	1	1	4	85	9.1	9.31
P62849	40S ribosomal protein S24 OS=Mus musculus GN=Rps24 PE=2 SV=1 - [RS24_MOUSE]	124.17	0.2857	1	3	3	23	133	15.4	10.78
Q62093	Serine/arginine-rich splicing factor 2 OS=Mus musculus GN=Srsf2 PE=1 SV=4 - [SRSF2_MOUSE]	153.79	0.1448	1	3	3	23	221	25.5	11.85
P62334	26S protease regulatory subunit 10B OS=Mus musculus GN=Psmc6 PE=1 SV=1 - [PRS10_MOUSE]	500.64	0.4139	1	12	12	38	389	44.1	7.49
P61222	ATP-binding cassette sub-family E member 1 OS=Mus musculus GN=Abce1 PE=2 SV=1 - [ABCE1_MOUSE]	339.21	0.2638	1	13	13	20	599	67.3	8.34
P62830	60S ribosomal protein L23 OS=Mus musculus GN=Rpl23 PE=1 SV=1 - [RL23_MOUSE]	296	0.5714	1	9	9	20	140	14.9	10.51
O35900	U6 snRNA-associated Sm-like protein LSm2 OS=Mus musculus GN=Lsm2 PE=2 SV=1 - [LSM2_MOUSE]	155.1	0.6105	1	4	4	15	95	10.8	6.52
P68037	Ubiquitin-conjugating enzyme E2 L3 OS=Mus musculus GN=Ube2l3 PE=2 SV=1 - [UB2L3_MOUSE]	364.93	0.7403	2	9	9	49	154	17.9	8.51
Q6PHN9	Ras-related protein Rab-35 OS=Mus musculus GN=Rab35 PE=1 SV=1 - [RAB35_MOUSE]	238.14	0.3682	7	4	7	30	201	23	8.29
P62315	Small nuclear ribonucleoprotein Sm D1 OS=Mus musculus GN=Snrpd1 PE=1 SV=1 - [SMD1_MOUSE]	96.08	0.2773	1	2	2	10	119	13.3	11.56
P63168	Dynein light chain 1, cytoplasmic OS=Mus musculus GN=Dynll1 PE=1 SV=1 - [DYL1_MOUSE]	171.58	0.5169	1	4	5	30	89	10.4	7.4
P62843	40S ribosomal protein S15 OS=Mus musculus GN=Rps15 PE=2 SV=2 - [RS15_MOUSE]	167.56	0.4138	1	4	4	14	145	17	10.39
P10854	Histone H2B type 1-M OS=Mus musculus GN=Hist1h2bm PE=1 SV=2 - [H2B1M_MOUSE]	394.04	0.627	9	4	10	212	126	13.9	10.32
P61290	Proteasome activator complex subunit 3 OS=Mus musculus GN=Psme3 PE=1 SV=1 - [PSME3_MOUSE]	303.47	0.2874	1	6	6	20	254	29.5	5.95
Q9CXW4	60S ribosomal protein L11 OS=Mus musculus GN=Rpl11 PE=1 SV=4 - [RL11_MOUSE]	206.58	0.2921	1	6	6	24	178	20.2	9.6
P62270	40S ribosomal protein S18 OS=Mus musculus GN=Rps18 PE=1 SV=3 - [RS18_MOUSE]	392.08	0.5724	1	12	12	44	152	17.7	10.99
P62852	40S ribosomal protein S25 OS=Mus musculus GN=Rps25 PE=2 SV=1 - [RS25_MOUSE]	195.03	0.384	1	6	6	24	125	13.7	10.11
P62862	40S ribosomal protein S30 OS=Mus musculus GN=Fau PE=2 SV=1 - [RS30_MOUSE]	48.55	0.1864	1	2	2	4	59	6.6	12.15
Q9CXY6	Interleukin enhancer-binding factor 2 OS=Mus musculus GN=Ilf2 PE=1 SV=1 - [ILF2_MOUSE]	373.86	0.3769	1	10	10	28	390	43	5.26
P61027	Ras-related protein Rab-10 OS=Mus musculus GN=Rab10 PE=1 SV=1 - [RAB10_MOUSE]	273.99	0.305	10	4	7	39	200	22.5	8.38
Q91V41	Ras-related protein Rab-14 OS=Mus musculus GN=Rab14 PE=1 SV=3 - [RAB14_MOUSE]	167.86	0.2233	8	3	5	25	215	23.9	6.21
P62821	Ras-related protein Rab-1A OS=Mus musculus GN=Rab1A PE=1 SV=3 - [RAB1A_MOUSE]	484.15	0.7073	7	7	13	61	205	22.7	6.21
Q9Z2U1	Proteasome subunit alpha type-5 OS=Mus musculus GN=Psma5 PE=1 SV=1 - [PSA5_MOUSE]	346.16	0.4315	1	8	8	39	241	26.4	4.79
Q9CQC6	Basic leucine zipper and W2 domain-containing protein 1 OS=Mus musculus GN=Bzw1 PE=1 SV=1 - [BZW1_MOUSE]	386.29	0.3174	1	11	13	29	419	48	5.92
P62911	60S ribosomal protein L32 OS=Mus musculus GN=Rpl32 PE=2 SV=2 - [RL32_MOUSE]	241.05	0.4593	1	8	8	22	135	15.8	11.33
Q8BMJ3	Eukaryotic translation initiation factor 1A, X-chromosomal OS=Mus musculus GN=Eif1ax PE=2 SV=3 - [IF1AX_MOUSE]	267.6	0.6389	2	2	8	18	144	16.5	5.24
Q8BPB0	MOB kinase activator 1B OS=Mus musculus GN=Mob1b PE=1 SV=3 - [MOB1B_MOUSE]	65.93	0.1389	2	3	3	6	216	25.1	6.73
P62196	26S protease regulatory subunit 8 OS=Mus musculus GN=Psmc5 PE=1 SV=1 - [PRS8_MOUSE]	589.12	0.5296	1	16	17	40	406	45.6	7.55
P84104	Serine/arginine-rich splicing factor 3 OS=Mus musculus GN=Srsf3 PE=1 SV=1 - [SRSF3_MOUSE]	120.05	0.2317	1	3	4	15	164	19.3	11.65
Q3UKJ7	WD40 repeat-containing protein SMU1 OS=Mus musculus GN=Smu1 PE=2 SV=2 - [SMU1_MOUSE]	139.79	0.0975	1	4	4	7	513	57.5	7.18
Q9D0R8	Protein LSM12 homolog OS=Mus musculus GN=Lsm12 PE=1 SV=1 - [LSM12_MOUSE]	68.84	0.1897	1	2	2	3	195	21.7	7.74
P83940	Transcription elongation factor B polypeptide 1 OS=Mus musculus GN=Tceb1 PE=1 SV=1 - [ELOC_MOUSE]	191.38	0.5804	1	5	5	15	112	12.5	4.78
Q6P1F6	Serine/threonine-protein phosphatase 2A 55 kDa regulatory subunit B alpha isoform OS=Mus musculus GN=Ppp2r2a PE=1 SV=1 - [2ABA_MOUSE]	109.54	0.0805	3	3	3	8	447	51.7	6.2
P62855	40S ribosomal protein S26 OS=Mus musculus GN=Rps26 PE=2 SV=3 - [RS26_MOUSE]	118.73	0.313	1	3	3	8	115	13	11
Q9CZM2	60S ribosomal protein L15 OS=Mus musculus GN=Rpl15 PE=2 SV=4 - [RL15_MOUSE]	194.68	0.348	1	6	6	18	204	24.1	11.62
P83917	Chromobox protein homolog 1 OS=Mus musculus GN=Cbx1 PE=1 SV=1 - [CBX1_MOUSE]	294.49	0.4378	1	5	6	27	185	21.4	4.93
P62192	26S protease regulatory subunit 4 OS=Mus musculus GN=Psmc1 PE=1 SV=1 - [PRS4_MOUSE]	575.22	0.4864	1	16	17	39	440	49.2	6.21
P61082	NEDD8-conjugating enzyme Ubc12 OS=Mus musculus GN=Ube2m PE=2 SV=1 - [UBC12_MOUSE]	151.99	0.3333	1	6	6	10	183	20.9	7.69
P61924	Coatomer subunit zeta-1 OS=Mus musculus GN=Copz1 PE=2 SV=1 - [COPZ1_MOUSE]	177.49	0.339	1	5	5	11	177	20.2	4.81
P61967	AP-1 complex subunit sigma-1A OS=Mus musculus GN=Ap1s1 PE=1 SV=1 - [AP1S1_MOUSE]	171.98	0.2025	1	3	3	9	158	18.7	5.73
P60898	DNA-directed RNA polymerase II subunit RPB9 OS=Mus musculus GN=Polr2i PE=2 SV=1 - [RPB9_MOUSE]	59.77	0.184	1	1	1	3	125	14.5	5.14
P84084	ADP-ribosylation factor 5 OS=Mus musculus GN=Arf5 PE=1 SV=2 - [ARF5_MOUSE]	354.38	0.6389	1	4	10	56	180	20.5	6.79
Q9JLR1	Protein transport protein Sec61 subunit alpha isoform 2 OS=Mus musculus GN=Sec61a2 PE=2 SV=3 - [S61A2_MOUSE]	118.92	0.1239	1	1	4	6	476	52.2	8.06
P61202	COP9 signalosome complex subunit 2 OS=Mus musculus GN=Cops2 PE=1 SV=1 - [CSN2_MOUSE]	226.11	0.1896	1	7	7	14	443	51.6	5.53
P62305	Small nuclear ribonucleoprotein E OS=Mus musculus GN=Snrpe PE=1 SV=1 - [RUXE_MOUSE]	155.3	0.6522	1	4	4	25	92	10.8	9.44
Q9D0M5	Dynein light chain 2, cytoplasmic OS=Mus musculus GN=Dynll2 PE=1 SV=1 - [DYL2_MOUSE]	149.54	0.5056	1	3	4	17	89	10.3	7.37
Q6ZWN5	40S ribosomal protein S9 OS=Mus musculus GN=Rps9 PE=2 SV=3 - [RS9_MOUSE]	223.63	0.3196	1	7	7	13	194	22.6	10.65
O35593	26S proteasome non-ATPase regulatory subunit 14 OS=Mus musculus GN=Psmd14 PE=1 SV=2 - [PSDE_MOUSE]	230.87	0.3161	1	6	6	14	310	34.6	6.52
Q6ZWY8	Thymosin beta-10 OS=Mus musculus GN=Tmsb10 PE=2 SV=3 - [TYB10_MOUSE]	60.91	0.4545	1	1	3	11	44	5	5.36
Q9CQW2	ADP-ribosylation factor-like protein 8B OS=Mus musculus GN=Arl8b PE=2 SV=1 - [ARL8B_MOUSE]	153.62	0.4086	1	1	5	7	186	21.5	8.43
P62827	GTP-binding nuclear protein Ran OS=Mus musculus GN=Ran PE=1 SV=3 - [RAN_MOUSE]	400.44	0.4398	2	11	11	70	216	24.4	7.49
P62320	Small nuclear ribonucleoprotein Sm D3 OS=Mus musculus GN=Snrpd3 PE=1 SV=1 - [SMD3_MOUSE]	238.31	0.4762	1	4	4	20	126	13.9	10.32
P62331	ADP-ribosylation factor 6 OS=Mus musculus GN=Arf6 PE=1 SV=2 - [ARF6_MOUSE]	126.44	0.2743	2	3	4	7	175	20.1	8.95
Q8BK63	Casein kinase I isoform alpha OS=Mus musculus GN=Csnk1a1 PE=2 SV=2 - [KC1A_MOUSE]	110.26	0.089	1	3	3	6	337	38.9	9.57
P61957	Small ubiquitin-related modifier 2 OS=Mus musculus GN=Sumo2 PE=2 SV=1 - [SUMO2_MOUSE]	77.77	0.1895	2	2	2	8	95	10.9	5.5
Q6ZWY3	40S ribosomal protein S27-like OS=Mus musculus GN=Rps27l PE=2 SV=3 - [RS27L_MOUSE]	90.61	0.381	1	1	3	5	84	9.5	9.45
Q6ZWU9	40S ribosomal protein S27 OS=Mus musculus GN=Rps27 PE=1 SV=3 - [RS27_MOUSE]	107.65	0.3929	1	2	4	7	84	9.5	9.45
O70274	Protein tyrosine phosphatase type IVA 2 OS=Mus musculus GN=Ptp4a2 PE=1 SV=1 - [TP4A2_MOUSE]	50.11	0.0898	1	1	1	2	167	19.1	8.37
P62996	Transformer-2 protein homolog beta OS=Mus musculus GN=Tra2b PE=2 SV=1 - [TRA2B_MOUSE]	228.75	0.2361	1	5	5	21	288	33.6	11.25
P62918	60S ribosomal protein L8 OS=Mus musculus GN=Rpl8 PE=2 SV=2 - [RL8_MOUSE]	343.01	0.4125	1	10	10	21	257	28	11.03
Q9D0T1	NHP2-like protein 1 OS=Mus musculus GN=Nhp2l1 PE=2 SV=4 - [NH2L1_MOUSE]	192.69	0.4063	1	5	5	13	128	14.2	8.46
P84228	Histone H3.2 OS=Mus musculus GN=Hist1h3b PE=1 SV=2 - [H32_MOUSE]	258.41	0.6029	1	1	9	88	136	15.4	11.27
P68433	Histone H3.1 OS=Mus musculus GN=Hist1h3a PE=1 SV=2 - [H31_MOUSE]	254.17	0.6029	1	1	9	51	136	15.4	11.12
P61226	Ras-related protein Rap-2b OS=Mus musculus GN=Rap2b PE=1 SV=1 - [RAP2B_MOUSE]	107.27	0.1803	3	3	3	7	183	20.5	4.81
P63280	SUMO-conjugating enzyme UBC9 OS=Mus musculus GN=Ube2i PE=1 SV=1 - [UBC9_MOUSE]	137.58	0.2342	1	6	6	12	158	18	8.66
Q8JZM7	Parafibromin OS=Mus musculus GN=Cdc73 PE=2 SV=1 - [CDC73_MOUSE]	44.72	0.0377	1	2	2	2	531	60.5	9.61
P60867	40S ribosomal protein S20 OS=Mus musculus GN=Rps20 PE=2 SV=1 - [RS20_MOUSE]	147.14	0.3613	1	5	5	20	119	13.4	9.94
O08599	Syntaxin-binding protein 1 OS=Mus musculus GN=Stxbp1 PE=1 SV=2 - [STXB1_MOUSE]	60.89	0.069	1	3	3	4	594	67.5	6.96
Q9DCR2	AP-3 complex subunit sigma-1 OS=Mus musculus GN=Ap3s1 PE=1 SV=2 - [AP3S1_MOUSE]	68.42	0.1192	1	2	2	2	193	21.7	5.39
Q8K003	Translation machinery-associated protein 7 OS=Mus musculus GN=Tma7 PE=2 SV=1 - [TMA7_MOUSE]	79.37	0.3125	1	4	4	4	64	7.1	9.99
Q921L3	Transmembrane and coiled-coil domain-containing protein 1 OS=Mus musculus GN=Tmco1 PE=2 SV=1 - [TMCO1_MOUSE]	82.63	0.1223	1	2	2	2	188	21.2	9.74
P0C0S6	Histone H2A.Z OS=Mus musculus GN=H2afz PE=1 SV=2 - [H2AZ_MOUSE]	245.48	0.5391	2	4	6	57	128	13.5	10.58
Q91X97	Neurocalcin-delta OS=Mus musculus GN=Ncald PE=1 SV=4 - [NCALD_MOUSE]	23.09	0.0622	1	1	1	2	193	22.2	5.35
Q6PEB6	MOB-like protein phocein OS=Mus musculus GN=Mob4 PE=1 SV=1 - [PHOCN_MOUSE]	77.94	0.1067	1	2	2	2	225	26	5.78
P84089	Enhancer of rudimentary homolog OS=Mus musculus GN=Erh PE=1 SV=1 - [ERH_MOUSE]	125.65	0.3846	1	5	5	14	104	12.3	5.92
Q922F4	Tubulin beta-6 chain OS=Mus musculus GN=Tubb6 PE=1 SV=1 - [TBB6_MOUSE]	859.4	0.566	2	7	20	155	447	50.1	4.89
P20029	78 kDa glucose-regulated protein OS=Mus musculus GN=Hspa5 PE=1 SV=3 - [GRP78_MOUSE]	1708.39	0.5481	1	34	37	254	655	72.4	5.16
P17742	Peptidyl-prolyl cis-trans isomerase A OS=Mus musculus GN=Ppia PE=1 SV=2 - [PPIA_MOUSE]	605.54	0.622	1	13	14	394	164	18	7.9
P60766	Cell division control protein 42 homolog OS=Mus musculus GN=Cdc42 PE=1 SV=2 - [CDC42_MOUSE]	290.08	0.5131	1	8	8	56	191	21.2	6.55
Q9CXV1	Succinate dehydrogenase [ubiquinone] cytochrome b small subunit, mitochondrial OS=Mus musculus GN=Sdhd PE=2 SV=2 - [DHSD_MOUSE]	25.26	0.044	1	1	1	1	159	17	9.1
P49312	Heterogeneous nuclear ribonucleoprotein A1 OS=Mus musculus GN=Hnrnpa1 PE=1 SV=2 - [ROA1_MOUSE]	767.34	0.5031	1	13	16	186	320	34.2	9.23
Q61990	Poly(rC)-binding protein 2 OS=Mus musculus GN=Pcbp2 PE=1 SV=1 - [PCBP2_MOUSE]	637.69	0.5	2	8	13	55	362	38.2	6.79
P62075	Mitochondrial import inner membrane translocase subunit Tim13 OS=Mus musculus GN=Timm13 PE=1 SV=1 - [TIM13_MOUSE]	102.48	0.2632	1	2	2	5	95	10.5	8.18
Q923T9	Calcium/calmodulin-dependent protein kinase type II subunit gamma OS=Mus musculus GN=Camk2g PE=1 SV=1 - [KCC2G_MOUSE]	32.06	0.0473	1	1	1	1	529	59.6	7.58
P61255	60S ribosomal protein L26 OS=Mus musculus GN=Rpl26 PE=2 SV=1 - [RL26_MOUSE]	200.04	0.3586	1	8	8	19	145	17.2	10.55
P46935	E3 ubiquitin-protein ligase NEDD4 OS=Mus musculus GN=Nedd4 PE=1 SV=3 - [NEDD4_MOUSE]	691.82	0.2604	1	16	20	52	887	102.6	5.26
O88983	Syntaxin-8 OS=Mus musculus GN=Stx8 PE=1 SV=1 - [STX8_MOUSE]	74.02	0.1059	1	2	2	4	236	26.9	5.01
Q9WTX2	Interferon-inducible double-stranded RNA-dependent protein kinase activator A OS=Mus musculus GN=Prkra PE=1 SV=1 - [PRKRA_MOUSE]	104.49	0.1693	1	4	4	6	313	34.3	8.43
P97770	THUMP domain-containing protein 3 OS=Mus musculus GN=Thumpd3 PE=2 SV=1 - [THUM3_MOUSE]	144.12	0.0871	1	3	3	3	505	56.4	7.43
Q8CBY8	Dynactin subunit 4 OS=Mus musculus GN=Dctn4 PE=1 SV=1 - [DCTN4_MOUSE]	59.08	0.0385	1	2	2	2	467	53	7.72
P56480	ATP synthase subunit beta, mitochondrial OS=Mus musculus GN=Atp5b PE=1 SV=2 - [ATPB_MOUSE]	1208.08	0.6767	1	22	22	215	529	56.3	5.34
P68373	Tubulin alpha-1C chain OS=Mus musculus GN=Tuba1c PE=1 SV=1 - [TBA1C_MOUSE]	1344.33	0.6414	3	3	24	427	449	49.9	5.1
Q3UV17	Keratin, type II cytoskeletal 2 oral OS=Mus musculus GN=Krt76 PE=2 SV=1 - [K22O_MOUSE]	91.28	0.0455	6	1	3	5	594	62.8	8.43
P58252	Elongation factor 2 OS=Mus musculus GN=Eef2 PE=1 SV=2 - [EF2_MOUSE]	1989.45	0.641	1	48	49	321	858	95.3	6.83
Q8BGZ7	Keratin, type II cytoskeletal 75 OS=Mus musculus GN=Krt75 PE=1 SV=1 - [K2C75_MOUSE]	107.94	0.0544	9	1	3	10	551	59.7	8.31
Q60972	Histone-binding protein RBBP4 OS=Mus musculus GN=Rbbp4 PE=1 SV=5 - [RBBP4_MOUSE]	351.64	0.2776	4	5	12	28	425	47.6	4.89
P84099	60S ribosomal protein L19 OS=Mus musculus GN=Rpl19 PE=1 SV=1 - [RL19_MOUSE]	114.7	0.1327	1	4	4	9	196	23.5	11.47
Q9R0U0	Serine/arginine-rich splicing factor 10 OS=Mus musculus GN=Srsf10 PE=1 SV=2 - [SRS10_MOUSE]	128.7	0.1908	1	4	4	11	262	31.3	11.27
Q921E6	Polycomb protein EED OS=Mus musculus GN=Eed PE=1 SV=1 - [EED_MOUSE]	81.31	0.068	1	3	3	4	441	50.2	7.03
P61327	Protein mago nashi homolog OS=Mus musculus GN=Magoh PE=2 SV=1 - [MGN_MOUSE]	57.67	0.3151	2	3	3	5	146	17.2	6.11
P67871	Casein kinase II subunit beta OS=Mus musculus GN=Csnk2b PE=1 SV=1 - [CSK2B_MOUSE]	44.41	0.0884	1	2	2	11	215	24.9	5.55
P59708	Pre-mRNA branch site protein p14 OS=Mus musculus GN=Sf3b14 PE=1 SV=1 - [PM14_MOUSE]	51.99	0.208	1	2	2	5	125	14.6	9.38
Q99M28	RNA-binding protein with serine-rich domain 1 OS=Mus musculus GN=Rnps1 PE=2 SV=1 - [RNPS1_MOUSE]	115.52	0.2033	1	5	5	6	305	34.2	11.84
P53996	Cellular nucleic acid-binding protein OS=Mus musculus GN=Cnbp PE=2 SV=2 - [CNBP_MOUSE]	223.4	0.3764	1	6	6	22	178	19.6	7.58
Q9WVA3	Mitotic checkpoint protein BUB3 OS=Mus musculus GN=Bub3 PE=2 SV=2 - [BUB3_MOUSE]	171.9	0.2362	1	6	6	11	326	36.9	6.84
Q6ZWM4	N-alpha-acetyltransferase 38, NatC auxiliary subunit OS=Mus musculus GN=Naa38 PE=3 SV=3 - [NAA38_MOUSE]	195.75	0.5208	1	3	3	9	96	10.4	4.48
Q9D287	Pre-mRNA-splicing factor SPF27 OS=Mus musculus GN=Bcas2 PE=2 SV=1 - [SPF27_MOUSE]	120.6	0.2444	1	4	4	5	225	26.1	5.66
P62257	Ubiquitin-conjugating enzyme E2 H OS=Mus musculus GN=Ube2h PE=2 SV=1 - [UBE2H_MOUSE]	88.03	0.2678	1	4	4	6	183	20.6	4.67
Q9JIX0	Transcription and mRNA export factor ENY2 OS=Mus musculus GN=Eny2 PE=2 SV=1 - [ENY2_MOUSE]	44.72	0.1683	1	1	1	1	101	11.5	9.33
P62073	Mitochondrial import inner membrane translocase subunit Tim10 OS=Mus musculus GN=Timm10 PE=1 SV=1 - [TIM10_MOUSE]	63.08	0.2111	1	1	1	1	90	10.3	6.29
Q8BFQ4	WD repeat-containing protein 82 OS=Mus musculus GN=Wdr82 PE=1 SV=1 - [WDR82_MOUSE]	38.52	0.1054	1	2	2	2	313	35.1	7.69
P11983	T-complex protein 1 subunit alpha OS=Mus musculus GN=Tcp1 PE=1 SV=3 - [TCPA_MOUSE]	1177.43	0.5432	1	25	25	125	556	60.4	6.16
Q9D8N0	Elongation factor 1-gamma OS=Mus musculus GN=Eef1g PE=1 SV=3 - [EF1G_MOUSE]	882.46	0.4966	1	21	21	132	437	50	6.74
P33609	DNA polymerase alpha catalytic subunit OS=Mus musculus GN=Pola1 PE=1 SV=2 - [DPOLA_MOUSE]	64.5	0.0171	1	2	2	2	1465	167.2	5.74
O35083	1-acyl-sn-glycerol-3-phosphate acyltransferase alpha OS=Mus musculus GN=Agpat1 PE=2 SV=1 - [PLCA_MOUSE]	21.24	0.0807	1	1	1	1	285	31.7	9.14
Q8VED5	Keratin, type II cytoskeletal 79 OS=Mus musculus GN=Krt79 PE=2 SV=2 - [K2C79_MOUSE]	63.15	0.0358	5	1	2	4	531	57.5	7.69
Q8BFZ3	Beta-actin-like protein 2 OS=Mus musculus GN=Actbl2 PE=1 SV=1 - [ACTBL_MOUSE]	473.84	0.3191	1	1	13	378	376	42	5.49
P60521	Gamma-aminobutyric acid receptor-associated protein-like 2 OS=Mus musculus GN=Gabarapl2 PE=1 SV=1 - [GBRL2_MOUSE]	46.5	0.1709	1	2	2	3	117	13.7	8.1
P17665	Cytochrome c oxidase subunit 7C, mitochondrial OS=Mus musculus GN=Cox7c PE=1 SV=1 - [COX7C_MOUSE]	40.7	0.2857	1	2	2	3	63	7.3	11
Q9D5T0	ATPase family AAA domain-containing protein 1 OS=Mus musculus GN=Atad1 PE=1 SV=1 - [ATAD1_MOUSE]	293.86	0.2244	1	7	7	11	361	40.7	6.9
P61965	WD repeat-containing protein 5 OS=Mus musculus GN=Wdr5 PE=1 SV=1 - [WDR5_MOUSE]	68.35	0.0808	1	2	2	4	334	36.6	8.27
P61514	60S ribosomal protein L37a OS=Mus musculus GN=Rpl37a PE=2 SV=2 - [RL37A_MOUSE]	177.65	0.587	1	6	6	8	92	10.3	10.43
Q8K4B0	Metastasis-associated protein MTA1 OS=Mus musculus GN=Mta1 PE=1 SV=1 - [MTA1_MOUSE]	17.09	0.0182	1	1	1	1	715	80.7	9.29
P35700	Peroxiredoxin-1 OS=Mus musculus GN=Prdx1 PE=1 SV=1 - [PRDX1_MOUSE]	576.4	0.5327	1	14	16	110	199	22.2	8.12
O08807	Peroxiredoxin-4 OS=Mus musculus GN=Prdx4 PE=1 SV=1 - [PRDX4_MOUSE]	173.63	0.2226	1	3	5	20	274	31	7.15
P05064	Fructose-bisphosphate aldolase A OS=Mus musculus GN=Aldoa PE=1 SV=2 - [ALDOA_MOUSE]	892.66	0.7335	2	25	25	108	364	39.3	8.09
Q61696	Heat shock 70 kDa protein 1A OS=Mus musculus GN=Hspa1a PE=1 SV=2 - [HS71A_MOUSE]	372.93	0.1794	2	3	9	55	641	70	5.72
P16858	Glyceraldehyde-3-phosphate dehydrogenase OS=Mus musculus GN=Gapdh PE=1 SV=2 - [G3P_MOUSE]	810.19	0.5916	2	15	15	438	333	35.8	8.25
P63017	Heat shock cognate 71 kDa protein OS=Mus musculus GN=Hspa8 PE=1 SV=1 - [HSP7C_MOUSE]	1696.26	0.6099	1	25	37	363	646	70.8	5.52
O08709	Peroxiredoxin-6 OS=Mus musculus GN=Prdx6 PE=1 SV=3 - [PRDX6_MOUSE]	618.21	0.7321	1	15	15	88	224	24.9	6.01
P30275	Creatine kinase U-type, mitochondrial OS=Mus musculus GN=Ckmt1 PE=1 SV=1 - [KCRU_MOUSE]	54.78	0.0502	1	1	1	2	418	47	8.16
Q9CQV8	14-3-3 protein beta/alpha OS=Mus musculus GN=Ywhab PE=1 SV=3 - [1433B_MOUSE]	723.31	0.6829	2	10	16	125	246	28.1	4.83
P68510	14-3-3 protein eta OS=Mus musculus GN=Ywhah PE=1 SV=2 - [1433F_MOUSE]	673.51	0.622	2	12	16	119	246	28.2	4.89
P68254	14-3-3 protein theta OS=Mus musculus GN=Ywhaq PE=1 SV=1 - [1433T_MOUSE]	845.33	0.6898	2	14	19	151	245	27.8	4.78
P63101	14-3-3 protein zeta/delta OS=Mus musculus GN=Ywhaz PE=1 SV=1 - [1433Z_MOUSE]	940.37	0.6571	1	14	18	203	245	27.8	4.79
Q61151	Serine/threonine-protein phosphatase 2A 56 kDa regulatory subunit epsilon isoform OS=Mus musculus GN=Ppp2r5e PE=2 SV=3 - [2A5E_MOUSE]	93.01	0.0578	1	2	2	3	467	54.7	6.95
Q60996	Serine/threonine-protein phosphatase 2A 56 kDa regulatory subunit gamma isoform OS=Mus musculus GN=Ppp2r5c PE=1 SV=2 - [2A5G_MOUSE]	25.48	0.0134	1	1	1	2	524	60.8	6.64
Q76MZ3	Serine/threonine-protein phosphatase 2A 65 kDa regulatory subunit A alpha isoform OS=Mus musculus GN=Ppp2r1a PE=1 SV=3 - [2AAA_MOUSE]	945.35	0.4363	1	17	23	88	589	65.3	5.11
Q7TNP2	Serine/threonine-protein phosphatase 2A 65 kDa regulatory subunit A beta isoform OS=Mus musculus GN=Ppp2r1b PE=1 SV=2 - [2AAB_MOUSE]	467.79	0.2113	1	5	11	40	601	65.9	5.1
P55194	SH3 domain-binding protein 1 OS=Mus musculus GN=Sh3bp1 PE=1 SV=2 - [3BP1_MOUSE]	43.46	0.0216	1	1	1	1	601	65.2	5.68
Q99L13	3-hydroxyisobutyrate dehydrogenase, mitochondrial OS=Mus musculus GN=Hibadh PE=1 SV=1 - [3HIDH_MOUSE]	42.28	0.0955	1	2	2	2	335	35.4	8.13
P48193	Protein 4.1 OS=Mus musculus GN=Epb41 PE=1 SV=2 - [41_MOUSE]	73.11	0.028	1	2	2	2	858	95.9	5.6
Q60876	Eukaryotic translation initiation factor 4E-binding protein 1 OS=Mus musculus GN=Eif4ebp1 PE=1 SV=3 - [4EBP1_MOUSE]	74.09	0.1111	1	2	2	6	117	12.3	5.15
P70445	Eukaryotic translation initiation factor 4E-binding protein 2 OS=Mus musculus GN=Eif4ebp2 PE=2 SV=1 - [4EBP2_MOUSE]	27.67	0.1083	1	1	1	1	120	12.9	6.52
P10852	4F2 cell-surface antigen heavy chain OS=Mus musculus GN=Slc3a2 PE=1 SV=1 - [4F2_MOUSE]	451.73	0.251	1	11	11	25	526	58.3	5.91
Q3V1L4	Cytosolic purine 5'-nucleotidase OS=Mus musculus GN=Nt5c2 PE=1 SV=2 - [5NTC_MOUSE]	91.81	0.075	1	3	3	6	560	64.8	6.21
Q9DCD0	6-phosphogluconate dehydrogenase, decarboxylating OS=Mus musculus GN=Pgd PE=2 SV=3 - [6PGD_MOUSE]	779.31	0.4451	2	18	18	53	483	53.2	7.23
Q9CQ60	6-phosphogluconolactonase OS=Mus musculus GN=Pgls PE=2 SV=1 - [6PGL_MOUSE]	412.93	0.5837	1	10	10	45	257	27.2	5.85
Q571I9	Aldehyde dehydrogenase family 16 member A1 OS=Mus musculus GN=Aldh16a1 PE=2 SV=2 - [A16A1_MOUSE]	235.72	0.1496	1	8	8	9	802	84.7	6.32
Q8C0J2	Autophagy-related protein 16-1 OS=Mus musculus GN=Atg16l1 PE=1 SV=1 - [A16L1_MOUSE]	83.21	0.0313	1	2	2	3	607	68.1	6.38
P12023	Amyloid beta A4 protein OS=Mus musculus GN=App PE=1 SV=3 - [A4_MOUSE]	72.59	0.0299	1	2	2	2	770	86.7	4.79
Q3UD01	Putative ataxin-7-like protein 3B OS=Mus musculus GN=Atxn7l3b PE=3 SV=1 - [A7L3B_MOUSE]	37.46	0.2062	1	1	1	1	97	10.7	4.32
P51912	Neutral amino acid transporter B(0) OS=Mus musculus GN=Slc1a5 PE=1 SV=2 - [AAAT_MOUSE]	78.45	0.0271	1	1	1	1	553	58.4	7.84
Q9D2R0	Acetoacetyl-CoA synthetase OS=Mus musculus GN=Aacs PE=2 SV=1 - [AACS_MOUSE]	344.59	0.1756	1	12	12	25	672	75.2	6.71
Q8R2R3	Alpha- and gamma-adaptin-binding protein p34 OS=Mus musculus GN=Aagab PE=2 SV=2 - [AAGAB_MOUSE]	25.12	0.0285	1	1	1	1	316	34.5	4.64
Q3UHJ0	AP2-associated protein kinase 1 OS=Mus musculus GN=Aak1 PE=1 SV=2 - [AAK1_MOUSE]	60.75	0.0365	1	2	2	3	959	103.3	6.7
O54950	5'-AMP-activated protein kinase subunit gamma-1 OS=Mus musculus GN=Prkag1 PE=1 SV=2 - [AAKG1_MOUSE]	91.69	0.0909	1	2	2	3	330	37.5	7.14
Q5EG47	5'-AMP-activated protein kinase catalytic subunit alpha-1 OS=Mus musculus GN=Prkaa1 PE=1 SV=2 - [AAPK1_MOUSE]	154.87	0.0912	2	4	4	7	559	63.9	8.12
Q3THG9	Alanyl-tRNA editing protein Aarsd1 OS=Mus musculus GN=Aarsd1 PE=1 SV=2 - [AASD1_MOUSE]	39.35	0.0316	1	1	1	2	412	44.9	6.42
P05201	Aspartate aminotransferase, cytoplasmic OS=Mus musculus GN=Got1 PE=1 SV=3 - [AATC_MOUSE]	565.28	0.4479	1	16	16	46	413	46.2	7.14
Q9JKX4	Protein AATF OS=Mus musculus GN=Aatf PE=1 SV=1 - [AATF_MOUSE]	32.72	0.0247	1	1	1	2	526	59.4	4.93
P05202	Aspartate aminotransferase, mitochondrial OS=Mus musculus GN=Got2 PE=1 SV=1 - [AATM_MOUSE]	780.12	0.5163	1	20	20	111	430	47.4	9
Q9JI39	ATP-binding cassette sub-family B member 10, mitochondrial OS=Mus musculus GN=Abcb10 PE=2 SV=1 - [ABCBA_MOUSE]	54.99	0.0336	1	2	2	2	715	77.1	9.6
P55096	ATP-binding cassette sub-family D member 3 OS=Mus musculus GN=Abcd3 PE=1 SV=2 - [ABCD3_MOUSE]	244.82	0.1624	1	8	8	11	659	75.4	9.26
Q6P542	ATP-binding cassette sub-family F member 1 OS=Mus musculus GN=Abcf1 PE=1 SV=1 - [ABCF1_MOUSE]	299.55	0.1935	1	11	11	15	837	94.9	6.51
Q99LE6	ATP-binding cassette sub-family F member 2 OS=Mus musculus GN=Abcf2 PE=2 SV=1 - [ABCF2_MOUSE]	167.02	0.1099	1	5	5	8	628	71.7	7.05
Q8K268	ATP-binding cassette sub-family F member 3 OS=Mus musculus GN=Abcf3 PE=1 SV=1 - [ABCF3_MOUSE]	63.11	0.0437	1	2	2	3	709	79.8	6.16
Q7TMS5	ATP-binding cassette sub-family G member 2 OS=Mus musculus GN=Abcg2 PE=2 SV=1 - [ABCG2_MOUSE]	80.31	0.067	1	4	4	5	657	72.9	8.54
Q99LR1	Monoacylglycerol lipase ABHD12 OS=Mus musculus GN=Abhd12 PE=1 SV=2 - [ABD12_MOUSE]	43.8	0.0503	1	2	2	2	398	45.2	8.72
Q8R2Y0	Monoacylglycerol lipase ABHD6 OS=Mus musculus GN=Abhd6 PE=2 SV=1 - [ABHD6_MOUSE]	55.4	0.0446	1	1	1	1	336	38.2	8.47
Q6PE15	Mycophenolic acid acyl-glucuronide esterase, mitochondrial OS=Mus musculus GN=Abhd10 PE=2 SV=1 - [ABHDA_MOUSE]	56	0.0909	1	2	2	2	297	33	8.79
Q8VCR7	Alpha/beta hydrolase domain-containing protein 14B OS=Mus musculus GN=Abhd14b PE=2 SV=1 - [ABHEB_MOUSE]	226.88	0.2714	1	5	5	10	210	22.4	6.27
Q8K4G5	Actin-binding LIM protein 1 OS=Mus musculus GN=Ablim1 PE=1 SV=1 - [ABLM1_MOUSE]	219.95	0.0743	1	6	6	11	861	96.7	8.63
Q4KML4	Costars family protein ABRACL OS=Mus musculus GN=Abracl PE=3 SV=1 - [ABRAL_MOUSE]	103.98	0.4198	1	2	2	6	81	9	5.8
Q5SSL4	Active breakpoint cluster region-related protein OS=Mus musculus GN=Abr PE=1 SV=1 - [ABR_MOUSE]	31.59	0.0093	1	1	1	2	859	97.6	6.58
Q5SWU9	Acetyl-CoA carboxylase 1 OS=Mus musculus GN=Acaca PE=1 SV=1 - [ACACA_MOUSE]	429.88	0.0738	1	15	15	19	2345	265.1	6.39
Q8JZN5	Acyl-CoA dehydrogenase family member 9, mitochondrial OS=Mus musculus GN=Acad9 PE=1 SV=2 - [ACAD9_MOUSE]	77.37	0.0512	1	3	3	3	625	68.7	7.46
P51174	Long-chain specific acyl-CoA dehydrogenase, mitochondrial OS=Mus musculus GN=Acadl PE=1 SV=2 - [ACADL_MOUSE]	405.78	0.2465	1	10	10	28	430	47.9	8.31
P45952	Medium-chain specific acyl-CoA dehydrogenase, mitochondrial OS=Mus musculus GN=Acadm PE=1 SV=1 - [ACADM_MOUSE]	516.95	0.4157	1	14	14	26	421	46.5	8.37
Q07417	Short-chain specific acyl-CoA dehydrogenase, mitochondrial OS=Mus musculus GN=Acads PE=1 SV=2 - [ACADS_MOUSE]	380.91	0.25	1	8	8	26	412	44.9	8.47
P50544	Very long-chain specific acyl-CoA dehydrogenase, mitochondrial OS=Mus musculus GN=Acadvl PE=1 SV=3 - [ACADV_MOUSE]	499.98	0.343	1	15	15	26	656	70.8	8.75
Q99J27	Acetyl-coenzyme A transporter 1 OS=Mus musculus GN=Slc33a1 PE=1 SV=1 - [ACATN_MOUSE]	42.06	0.0236	1	1	1	1	550	61	8.16
P31786	Acyl-CoA-binding protein OS=Mus musculus GN=Dbi PE=1 SV=2 - [ACBP_MOUSE]	158.02	0.6207	1	5	5	26	87	10	8.82
Q9DBL1	Short/branched chain specific acyl-CoA dehydrogenase, mitochondrial OS=Mus musculus GN=Acadsb PE=1 SV=1 - [ACDSB_MOUSE]	45.9	0.0509	1	1	1	1	432	47.8	7.87
Q9JIX8	Apoptotic chromatin condensation inducer in the nucleus OS=Mus musculus GN=Acin1 PE=1 SV=3 - [ACINU_MOUSE]	221.17	0.071	1	9	9	14	1338	150.6	5.91
Q9Z2N8	Actin-like protein 6A OS=Mus musculus GN=Actl6a PE=1 SV=2 - [ACL6A_MOUSE]	206.56	0.2028	2	6	6	11	429	47.4	5.6
Q9CQR4	Acyl-coenzyme A thioesterase 13 OS=Mus musculus GN=Acot13 PE=1 SV=1 - [ACO13_MOUSE]	73.27	0.1786	1	2	2	3	140	15.2	8.82
P28271	Cytoplasmic aconitate hydratase OS=Mus musculus GN=Aco1 PE=1 SV=3 - [ACOC_MOUSE]	380.95	0.2115	1	12	13	20	889	98.1	7.5
P13516	Acyl-CoA desaturase 1 OS=Mus musculus GN=Scd1 PE=1 SV=2 - [ACOD1_MOUSE]	23.63	0.0366	1	1	1	1	355	41	9.07
Q99KI0	Aconitate hydratase, mitochondrial OS=Mus musculus GN=Aco2 PE=1 SV=1 - [ACON_MOUSE]	818.21	0.3577	1	23	23	68	780	85.4	7.93
Q9QYR9	Acyl-coenzyme A thioesterase 2, mitochondrial OS=Mus musculus GN=Acot2 PE=1 SV=2 - [ACOT2_MOUSE]	66.43	0.0817	1	2	2	2	453	49.6	7.36
Q9R0X4	Acyl-coenzyme A thioesterase 9, mitochondrial OS=Mus musculus GN=Acot9 PE=1 SV=1 - [ACOT9_MOUSE]	229.3	0.2073	2	8	8	15	439	50.5	8.59
Q9R0H0	Peroxisomal acyl-coenzyme A oxidase 1 OS=Mus musculus GN=Acox1 PE=1 SV=5 - [ACOX1_MOUSE]	61.7	0.062	1	3	3	4	661	74.6	8.48
Q9EPL9	Peroxisomal acyl-coenzyme A oxidase 3 OS=Mus musculus GN=Acox3 PE=2 SV=2 - [ACOX3_MOUSE]	54.7	0.0414	1	2	2	3	700	78.4	7.12
Q9CR21	Acyl carrier protein, mitochondrial OS=Mus musculus GN=Ndufab1 PE=1 SV=1 - [ACPM_MOUSE]	140.92	0.1923	1	4	4	10	156	17.4	5.21
Q8VCW8	Acyl-CoA synthetase family member 2, mitochondrial OS=Mus musculus GN=Acsf2 PE=1 SV=1 - [ACSF2_MOUSE]	122.49	0.0959	1	5	5	7	615	67.9	8.18
Q3URE1	Acyl-CoA synthetase family member 3, mitochondrial OS=Mus musculus GN=Acsf3 PE=2 SV=2 - [ACSF3_MOUSE]	10.46	0.0137	1	1	1	1	583	65	8.02
P41216	Long-chain-fatty-acid--CoA ligase 1 OS=Mus musculus GN=Acsl1 PE=1 SV=2 - [ACSL1_MOUSE]	97.78	0.0401	1	1	3	4	699	77.9	7.15
Q9QUJ7	Long-chain-fatty-acid--CoA ligase 4 OS=Mus musculus GN=Acsl4 PE=2 SV=2 - [ACSL4_MOUSE]	47.38	0.0408	1	2	2	2	711	79	8.28
Q8JZR0	Long-chain-fatty-acid--CoA ligase 5 OS=Mus musculus GN=Acsl5 PE=1 SV=1 - [ACSL5_MOUSE]	98.89	0.0586	1	1	3	5	683	76.2	7.09
Q7TPR4	Alpha-actinin-1 OS=Mus musculus GN=Actn1 PE=1 SV=1 - [ACTN1_MOUSE]	1947.33	0.5774	3	28	45	264	892	103	5.38
P57780	Alpha-actinin-4 OS=Mus musculus GN=Actn4 PE=1 SV=1 - [ACTN4_MOUSE]	1854.41	0.5669	1	27	44	244	912	104.9	5.41
Q8R5C5	Beta-centractin OS=Mus musculus GN=Actr1b PE=1 SV=1 - [ACTY_MOUSE]	283.78	0.3005	1	2	8	18	376	42.3	6.4
Q99JW2	Aminoacylase-1 OS=Mus musculus GN=Acy1 PE=1 SV=1 - [ACY1_MOUSE]	27.53	0.049	1	1	1	1	408	45.8	6.32
P56376	Acylphosphatase-1 OS=Mus musculus GN=Acyp1 PE=2 SV=2 - [ACYP1_MOUSE]	63.1	0.2121	1	2	2	2	99	11.2	9.04
Q61072	Disintegrin and metalloproteinase domain-containing protein 9 OS=Mus musculus GN=Adam9 PE=1 SV=2 - [ADAM9_MOUSE]	28.08	0.0166	1	1	1	1	845	92	7.47
Q8C0I1	Alkyldihydroxyacetonephosphate synthase, peroxisomal OS=Mus musculus GN=Agps PE=1 SV=1 - [ADAS_MOUSE]	172.36	0.1473	1	6	6	8	645	71.6	7.5
P03958	Adenosine deaminase OS=Mus musculus GN=Ada PE=1 SV=3 - [ADA_MOUSE]	55.75	0.0852	1	2	2	2	352	40	5.72
Q9QYC0	Alpha-adducin OS=Mus musculus GN=Add1 PE=1 SV=2 - [ADDA_MOUSE]	172.75	0.1293	1	7	7	8	735	80.6	5.9
Q9QYB5	Gamma-adducin OS=Mus musculus GN=Add3 PE=1 SV=2 - [ADDG_MOUSE]	105.99	0.0779	1	3	3	3	706	78.7	5.95
P00329	Alcohol dehydrogenase 1 OS=Mus musculus GN=Adh1 PE=2 SV=2 - [ADH1_MOUSE]	42.33	0.0267	1	1	2	3	375	39.7	8.1
Q64437	Alcohol dehydrogenase class 4 mu/sigma chain OS=Mus musculus GN=Adh7 PE=2 SV=2 - [ADH7_MOUSE]	549.91	0.4733	1	11	13	49	374	39.9	7.85
P28474	Alcohol dehydrogenase class-3 OS=Mus musculus GN=Adh5 PE=1 SV=3 - [ADHX_MOUSE]	497.07	0.4973	1	14	16	41	374	39.5	7.25
P55264	Adenosine kinase OS=Mus musculus GN=Adk PE=1 SV=2 - [ADK_MOUSE]	125.15	0.1108	1	4	4	6	361	40.1	6.21
Q9Z103	Activity-dependent neuroprotector homeobox protein OS=Mus musculus GN=Adnp PE=1 SV=1 - [ADNP_MOUSE]	75.86	0.029	1	2	2	4	828	92	6.06
Q8VDL4	ADP-dependent glucokinase OS=Mus musculus GN=Adpgk PE=1 SV=2 - [ADPGK_MOUSE]	123.68	0.1028	1	3	3	4	496	53.9	5.62
P54923	[Protein ADP-ribosylarginine] hydrolase OS=Mus musculus GN=Adprh PE=2 SV=1 - [ADPRH_MOUSE]	51.92	0.0193	1	1	1	1	362	40	5.76
Q9JKV1	Proteasomal ubiquitin receptor ADRM1 OS=Mus musculus GN=Adrm1 PE=1 SV=2 - [ADRM1_MOUSE]	75.74	0.1081	1	3	3	4	407	42	5.07
P48962	ADP/ATP translocase 1 OS=Mus musculus GN=Slc25a4 PE=1 SV=4 - [ADT1_MOUSE]	765.91	0.5537	2	9	18	107	298	32.9	9.72
P51881	ADP/ATP translocase 2 OS=Mus musculus GN=Slc25a5 PE=1 SV=3 - [ADT2_MOUSE]	721.44	0.5235	2	8	17	97	298	32.9	9.73
Q5DTU0	Actin filament-associated protein 1-like 2 OS=Mus musculus GN=Afap1l2 PE=1 SV=2 - [AF1L2_MOUSE]	314.46	0.1867	1	12	12	16	825	92.1	5.44
P97783	Protein AF1q OS=Mus musculus GN=Mllt11 PE=2 SV=1 - [AF1Q_MOUSE]	46.33	0.2778	1	1	1	1	90	10	4.41
Q9QZQ1	Afadin OS=Mus musculus GN=Mllt4 PE=1 SV=3 - [AFAD_MOUSE]	418.45	0.0841	1	12	12	18	1820	206.4	6.32
Q80YS6	Actin filament-associated protein 1 OS=Mus musculus GN=Afap1 PE=1 SV=1 - [AFAP1_MOUSE]	183.69	0.1122	2	7	7	10	731	80.6	8.68
Q920A7	AFG3-like protein 1 OS=Mus musculus GN=Afg3l1 PE=2 SV=2 - [AFG31_MOUSE]	123.14	0.0583	1	3	4	5	789	87	8.85
Q8JZQ2	AFG3-like protein 2 OS=Mus musculus GN=Afg3l2 PE=1 SV=1 - [AFG32_MOUSE]	123.22	0.0511	1	2	3	6	802	89.5	8.6
Q8VHH5	Arf-GAP with GTPase, ANK repeat and PH domain-containing protein 3 OS=Mus musculus GN=Agap3 PE=1 SV=1 - [AGAP3_MOUSE]	35.67	0.0154	1	1	1	1	910	97.9	7.75
Q80WC7	Arf-GAP domain and FG repeat-containing protein 2 OS=Mus musculus GN=Agfg2 PE=1 SV=1 - [AGFG2_MOUSE]	31.12	0.0376	1	1	1	1	479	48.9	9.1
Q9CYR6	Phosphoacetylglucosamine mutase OS=Mus musculus GN=Pgm3 PE=1 SV=1 - [AGM1_MOUSE]	172.83	0.1052	1	5	5	8	542	59.4	6.2
Q8CJG0	Protein argonaute-2 OS=Mus musculus GN=Ago2 PE=1 SV=3 - [AGO2_MOUSE]	32.11	0.0174	1	1	1	2	860	97.2	9.19
A2ASQ1	Agrin OS=Mus musculus GN=Agrn PE=1 SV=1 - [AGRIN_MOUSE]	240.6	0.0574	1	8	8	9	1950	207.4	6.32
Q6PAL7	AT-hook DNA-binding motif-containing protein 1 OS=Mus musculus GN=Ahdc1 PE=1 SV=1 - [AHDC1_MOUSE]	43.38	0.0075	1	1	1	1	1594	168	8.97
Q8BK64	Activator of 90 kDa heat shock protein ATPase homolog 1 OS=Mus musculus GN=Ahsa1 PE=2 SV=2 - [AHSA1_MOUSE]	298.68	0.3018	1	9	9	23	338	38.1	5.53
Q8N9S3	Activator of 90 kDa heat shock protein ATPase homolog 2 OS=Mus musculus GN=Ahsa2 PE=2 SV=2 - [AHSA2_MOUSE]	136.57	0.1178	1	4	4	4	331	37.6	6.44
Q8C4Q6	Axin interactor, dorsalization-associated protein OS=Mus musculus GN=Aida PE=1 SV=1 - [AIDA_MOUSE]	57.09	0.0721	1	2	2	2	305	34.9	6.74
Q9EQX4	Allograft inflammatory factor 1-like OS=Mus musculus GN=Aif1l PE=2 SV=1 - [AIF1L_MOUSE]	252.39	0.4733	3	8	8	21	150	17	7.18
Q9Z0X1	Apoptosis-inducing factor 1, mitochondrial OS=Mus musculus GN=Aifm1 PE=1 SV=1 - [AIFM1_MOUSE]	307.55	0.201	1	9	9	17	612	66.7	9.17
P31230	Aminoacyl tRNA synthase complex-interacting multifunctional protein 1 OS=Mus musculus GN=Aimp1 PE=1 SV=2 - [AIMP1_MOUSE]	370.8	0.4806	1	13	13	25	310	34	8.35
Q8R010	Aminoacyl tRNA synthase complex-interacting multifunctional protein 2 OS=Mus musculus GN=Aimp2 PE=1 SV=2 - [AIMP2_MOUSE]	138.74	0.2094	1	4	4	9	320	35.4	7.83
P46660	Alpha-internexin OS=Mus musculus GN=Ina PE=1 SV=2 - [AINX_MOUSE]	71.04	0.0476	4	1	2	17	504	55.7	5.27
O08915	AH receptor-interacting protein OS=Mus musculus GN=Aip PE=1 SV=1 - [AIP_MOUSE]	199.42	0.2485	1	6	6	12	330	37.6	6.4
Q9JII6	Alcohol dehydrogenase [NADP(+)] OS=Mus musculus GN=Akr1a1 PE=1 SV=3 - [AK1A1_MOUSE]	381.76	0.4154	1	11	11	36	325	36.6	7.39
Q8VC28	Aldo-keto reductase family 1 member C13 OS=Mus musculus GN=Akr1c13 PE=1 SV=2 - [AK1CD_MOUSE]	180.91	0.2136	1	4	5	10	323	37	7.08
Q9WTQ5	A-kinase anchor protein 12 OS=Mus musculus GN=Akap12 PE=1 SV=1 - [AKA12_MOUSE]	1872.96	0.3723	1	45	45	119	1684	180.6	4.44
O08715	A-kinase anchor protein 1, mitochondrial OS=Mus musculus GN=Akap1 PE=1 SV=4 - [AKAP1_MOUSE]	38.96	0.0152	1	1	1	1	857	92.1	5.02
O54931	A-kinase anchor protein 2 OS=Mus musculus GN=Akap2 PE=1 SV=3 - [AKAP2_MOUSE]	153.45	0.0952	1	5	5	6	893	98.5	5.21
Q9DBR0	A-kinase anchor protein 8 OS=Mus musculus GN=Akap8 PE=1 SV=1 - [AKAP8_MOUSE]	176.89	0.0873	1	5	5	9	687	76.2	5.14
Q9R0L7	A-kinase anchor protein 8-like OS=Mus musculus GN=Akap8l PE=1 SV=1 - [AKP8L_MOUSE]	34.81	0.0218	1	1	1	1	642	71.4	5.05
P31750	RAC-alpha serine/threonine-protein kinase OS=Mus musculus GN=Akt1 PE=1 SV=2 - [AKT1_MOUSE]	105.01	0.0958	1	4	4	6	480	55.7	5.9
Q62148	Retinal dehydrogenase 2 OS=Mus musculus GN=Aldh1a2 PE=2 SV=2 - [AL1A2_MOUSE]	345.32	0.2799	4	10	11	15	518	56.6	5.74
O35945	Aldehyde dehydrogenase, cytosolic 1 OS=Mus musculus GN=Aldh1a7 PE=2 SV=1 - [AL1A7_MOUSE]	56.26	0.0379	3	1	2	3	501	54.6	7.71
P47740	Fatty aldehyde dehydrogenase OS=Mus musculus GN=Aldh3a2 PE=2 SV=2 - [AL3A2_MOUSE]	103.47	0.0764	2	2	3	5	484	53.9	8.35
Q8CHT0	Delta-1-pyrroline-5-carboxylate dehydrogenase, mitochondrial OS=Mus musculus GN=Aldh4a1 PE=1 SV=3 - [AL4A1_MOUSE]	138.09	0.1032	1	4	4	7	562	61.8	8.24
Q9DBF1	Alpha-aminoadipic semialdehyde dehydrogenase OS=Mus musculus GN=Aldh7a1 PE=1 SV=4 - [AL7A1_MOUSE]	332.55	0.2468	1	11	11	15	539	58.8	7.47
Q9JLJ2	4-trimethylaminobutyraldehyde dehydrogenase OS=Mus musculus GN=Aldh9a1 PE=1 SV=1 - [AL9A1_MOUSE]	404.48	0.3178	1	11	11	20	494	53.5	6.98
P45377	Aldose reductase-related protein 2 OS=Mus musculus GN=Akr1b8 PE=1 SV=2 - [ALD2_MOUSE]	260.9	0.3576	2	9	11	21	316	36.1	6.37
P47738	Aldehyde dehydrogenase, mitochondrial OS=Mus musculus GN=Aldh2 PE=1 SV=1 - [ALDH2_MOUSE]	884.31	0.4971	3	19	21	64	519	56.5	7.62
P45376	Aldose reductase OS=Mus musculus GN=Akr1b1 PE=1 SV=3 - [ALDR_MOUSE]	603.12	0.6203	1	17	18	68	316	35.7	7.18
Q9DBE8	Alpha-1,3/1,6-mannosyltransferase ALG2 OS=Mus musculus GN=Alg2 PE=2 SV=2 - [ALG2_MOUSE]	25.22	0.0169	1	1	1	1	415	47.4	7.97
Q9DB25	Dolichyl-phosphate beta-glucosyltransferase OS=Mus musculus GN=Alg5 PE=2 SV=1 - [ALG5_MOUSE]	23.71	0.037	1	1	1	1	324	36.8	8.6
Q8K1E6	Alpha-ketoglutarate-dependent dioxygenase alkB homolog 3 OS=Mus musculus GN=Alkbh3 PE=1 SV=1 - [ALKB3_MOUSE]	57.59	0.0944	1	2	2	2	286	33	8.06
Q80Y20	Alkylated DNA repair protein alkB homolog 8 OS=Mus musculus GN=Alkbh8 PE=2 SV=1 - [ALKB8_MOUSE]	21.55	0.009	1	1	1	2	664	74.7	7.97
Q8VCT3	Aminopeptidase B OS=Mus musculus GN=Rnpep PE=2 SV=2 - [AMPB_MOUSE]	200.33	0.1369	1	7	7	14	650	72.4	5.35
O08739	AMP deaminase 3 OS=Mus musculus GN=Ampd3 PE=2 SV=2 - [AMPD3_MOUSE]	13.35	0.0091	1	1	1	1	766	88.6	7.33
P16406	Glutamyl aminopeptidase OS=Mus musculus GN=Enpep PE=1 SV=1 - [AMPE_MOUSE]	147.33	0.0857	1	6	6	9	945	107.9	5.44
Q9CPY7	Cytosol aminopeptidase OS=Mus musculus GN=Lap3 PE=1 SV=3 - [AMPL_MOUSE]	809.09	0.5222	1	21	21	57	519	56.1	7.72
Q8BP48	Methionine aminopeptidase 1 OS=Mus musculus GN=Metap1 PE=2 SV=1 - [MAP11_MOUSE]	318.9	0.3005	1	8	8	20	386	43.2	7.17
O08663	Methionine aminopeptidase 2 OS=Mus musculus GN=Metap2 PE=1 SV=1 - [MAP2_MOUSE]	181.81	0.1674	1	6	6	11	478	52.9	5.82
P55302	Alpha-2-macroglobulin receptor-associated protein OS=Mus musculus GN=Lrpap1 PE=1 SV=1 - [AMRP_MOUSE]	93.14	0.1194	1	4	4	6	360	42.2	7.87
Q80UP5	Ankyrin repeat domain-containing protein 13A OS=Mus musculus GN=Ankrd13a PE=1 SV=2 - [AN13A_MOUSE]	41.35	0.0323	1	1	1	2	588	67.1	5.08
O35381	Acidic leucine-rich nuclear phosphoprotein 32 family member A OS=Mus musculus GN=Anp32a PE=1 SV=1 - [AN32A_MOUSE]	227.73	0.2713	2	5	7	18	247	28.5	4.07
Q9EST5	Acidic leucine-rich nuclear phosphoprotein 32 family member B OS=Mus musculus GN=Anp32b PE=1 SV=1 - [AN32B_MOUSE]	145.48	0.1654	1	4	6	14	272	31.1	4.01
P97822	Acidic leucine-rich nuclear phosphoprotein 32 family member E OS=Mus musculus GN=Anp32e PE=1 SV=2 - [AN32E_MOUSE]	316.33	0.3192	2	7	7	20	260	29.6	3.88
Q8BZQ7	Anaphase-promoting complex subunit 2 OS=Mus musculus GN=Anapc2 PE=1 SV=2 - [ANC2_MOUSE]	75.48	0.049	1	4	4	4	837	95.2	5.31
Q810B6	Ankyrin repeat and FYVE domain-containing protein 1 OS=Mus musculus GN=Ankfy1 PE=2 SV=2 - [ANFY1_MOUSE]	340.98	0.1232	1	10	11	13	1169	128.6	5.91
Q8K298	Actin-binding protein anillin OS=Mus musculus GN=Anln PE=1 SV=2 - [ANLN_MOUSE]	91.58	0.0303	1	3	3	3	1121	122.7	6.98
Q3U3W5	Putative protein arginine N-methyltransferase 10 OS=Mus musculus GN=Prmt10 PE=2 SV=2 - [ANM10_MOUSE]	24.97	0.0201	1	1	1	1	846	94.2	5.36
Q9JIF0	Protein arginine N-methyltransferase 1 OS=Mus musculus GN=Prmt1 PE=1 SV=1 - [ANM1_MOUSE]	644.19	0.5391	2	18	18	51	371	42.4	5.43
Q922H1	Protein arginine N-methyltransferase 3 OS=Mus musculus GN=Prmt3 PE=1 SV=2 - [ANM3_MOUSE]	109.64	0.1034	1	4	4	4	532	59.9	5.3
Q8CIG8	Protein arginine N-methyltransferase 5 OS=Mus musculus GN=Prmt5 PE=1 SV=3 - [ANM5_MOUSE]	131.35	0.0911	1	5	5	6	637	72.6	6.42
Q8BH79	Anoctamin-10 OS=Mus musculus GN=Ano10 PE=2 SV=1 - [ANO10_MOUSE]	58.34	0.0182	1	1	1	2	659	76.1	6.7
Q6P9J9	Anoctamin-6 OS=Mus musculus GN=Ano6 PE=1 SV=1 - [ANO6_MOUSE]	76.58	0.0351	1	2	2	2	911	106.2	6.76
Q99NH0	Ankyrin repeat domain-containing protein 17 OS=Mus musculus GN=Ankrd17 PE=1 SV=2 - [ANR17_MOUSE]	131.93	0.0204	1	4	4	4	2603	274	6.52
Q3UMR0	Ankyrin repeat domain-containing protein 27 OS=Mus musculus GN=Ankrd27 PE=1 SV=2 - [ANR27_MOUSE]	20.65	0.0124	1	1	1	1	1048	116.7	6.65
B2RXR6	Serine/threonine-protein phosphatase 6 regulatory ankyrin repeat subunit B OS=Mus musculus GN=Ankrd44 PE=2 SV=1 - [ANR44_MOUSE]	43.9	0.0191	1	2	2	2	993	107.3	6.42
P97384	Annexin A11 OS=Mus musculus GN=Anxa11 PE=1 SV=2 - [ANX11_MOUSE]	264.28	0.1571	1	6	7	20	503	54	7.66
P10107	Annexin A1 OS=Mus musculus GN=Anxa1 PE=1 SV=2 - [ANXA1_MOUSE]	1282.37	0.6243	2	25	26	253	346	38.7	7.37
P07356	Annexin A2 OS=Mus musculus GN=Anxa2 PE=1 SV=2 - [ANXA2_MOUSE]	1357.86	0.7935	1	31	31	228	339	38.7	7.69
O35639	Annexin A3 OS=Mus musculus GN=Anxa3 PE=1 SV=4 - [ANXA3_MOUSE]	934.3	0.6904	1	23	24	104	323	36.4	5.76
P97429	Annexin A4 OS=Mus musculus GN=Anxa4 PE=2 SV=4 - [ANXA4_MOUSE]	847.39	0.5611	1	18	18	96	319	35.9	5.57
P48036	Annexin A5 OS=Mus musculus GN=Anxa5 PE=1 SV=1 - [ANXA5_MOUSE]	1202	0.7868	1	26	26	183	319	35.7	4.96
P14824	Annexin A6 OS=Mus musculus GN=Anxa6 PE=1 SV=3 - [ANXA6_MOUSE]	1142.46	0.5349	1	33	33	91	673	75.8	5.5
Q07076	Annexin A7 OS=Mus musculus GN=Anxa7 PE=2 SV=2 - [ANXA7_MOUSE]	455.66	0.2894	1	12	12	30	463	49.9	6.18
Q64133	Amine oxidase [flavin-containing] A OS=Mus musculus GN=Maoa PE=1 SV=3 - [AOFA_MOUSE]	51.45	0.0589	1	2	2	3	526	59.6	7.81
O35643	AP-1 complex subunit beta-1 OS=Mus musculus GN=Ap1b1 PE=1 SV=2 - [AP1B1_MOUSE]	605.51	0.2513	1	9	21	42	943	103.9	5.17
P22892	AP-1 complex subunit gamma-1 OS=Mus musculus GN=Ap1g1 PE=1 SV=3 - [AP1G1_MOUSE]	246.25	0.1314	2	9	9	17	822	91.3	6.8
P35585	AP-1 complex subunit mu-1 OS=Mus musculus GN=Ap1m1 PE=1 SV=3 - [AP1M1_MOUSE]	174.9	0.1797	2	6	6	11	423	48.5	7.3
P17426	AP-2 complex subunit alpha-1 OS=Mus musculus GN=Ap2a1 PE=1 SV=1 - [AP2A1_MOUSE]	392.17	0.1423	1	7	11	25	977	107.6	7.03
P17427	AP-2 complex subunit alpha-2 OS=Mus musculus GN=Ap2a2 PE=1 SV=2 - [AP2A2_MOUSE]	671.01	0.2697	1	16	20	46	938	104	6.93
Q9DBG3	AP-2 complex subunit beta OS=Mus musculus GN=Ap2b1 PE=1 SV=1 - [AP2B1_MOUSE]	671.25	0.2625	1	10	22	47	937	104.5	5.38
Q9Z1T1	AP-3 complex subunit beta-1 OS=Mus musculus GN=Ap3b1 PE=1 SV=2 - [AP3B1_MOUSE]	235.43	0.1041	2	10	10	13	1105	122.7	5.66
O54774	AP-3 complex subunit delta-1 OS=Mus musculus GN=Ap3d1 PE=1 SV=1 - [AP3D1_MOUSE]	174.11	0.0484	1	4	4	6	1199	135	7.37
Q8R2R9	AP-3 complex subunit mu-2 OS=Mus musculus GN=Ap3m2 PE=2 SV=1 - [AP3M2_MOUSE]	28.25	0.0239	2	1	1	1	418	46.9	7.56
P56380	Bis(5'-nucleosyl)-tetraphosphatase [asymmetrical] OS=Mus musculus GN=Nudt2 PE=1 SV=3 - [AP4A_MOUSE]	80.6	0.1837	1	2	2	3	147	17	6.28
P53995	Anaphase-promoting complex subunit 1 OS=Mus musculus GN=Anapc1 PE=2 SV=2 - [APC1_MOUSE]	67.36	0.0165	1	2	2	2	1944	215.9	6.35
Q91W96	Anaphase-promoting complex subunit 4 OS=Mus musculus GN=Anapc4 PE=1 SV=1 - [APC4_MOUSE]	44.28	0.0335	1	3	3	3	807	91.6	5.4
Q8BTZ4	Anaphase-promoting complex subunit 5 OS=Mus musculus GN=Anapc5 PE=2 SV=1 - [APC5_MOUSE]	60.54	0.0189	1	1	1	2	740	83	6.71
P28352	DNA-(apurinic or apyrimidinic site) lyase OS=Mus musculus GN=Apex1 PE=1 SV=2 - [APEX1_MOUSE]	354	0.4322	1	9	9	22	317	35.5	7.91
O35841	Apoptosis inhibitor 5 OS=Mus musculus GN=Api5 PE=1 SV=2 - [API5_MOUSE]	498.46	0.2976	1	14	14	28	504	56.7	5.92
Q01339	Beta-2-glycoprotein 1 OS=Mus musculus GN=Apoh PE=1 SV=1 - [APOH_MOUSE]	14.81	0.0261	1	1	1	1	345	38.6	8.22
Q78IK4	Apolipoprotein O-like OS=Mus musculus GN=Apool PE=2 SV=1 - [APOOL_MOUSE]	117.08	0.2528	1	4	4	6	265	29.2	9.31
P08030	Adenine phosphoribosyltransferase OS=Mus musculus GN=Aprt PE=1 SV=2 - [APT_MOUSE]	482.23	0.75	2	10	10	71	180	19.7	6.79
Q8CFQ3	Intron-binding protein aquarius OS=Mus musculus GN=Aqr PE=2 SV=2 - [AQR_MOUSE]	112.58	0.0378	4	3	4	8	1481	170.2	6.27
Q9JKW0	ADP-ribosylation factor-like protein 6-interacting protein 1 OS=Mus musculus GN=Arl6ip1 PE=2 SV=1 - [AR6P1_MOUSE]	15.1	0.0493	1	1	1	1	203	23.4	9.32
Q9WV32	Actin-related protein 2/3 complex subunit 1B OS=Mus musculus GN=Arpc1b PE=2 SV=4 - [ARC1B_MOUSE]	140.1	0.121	1	4	4	5	372	41	8.35
P61750	ADP-ribosylation factor 4 OS=Mus musculus GN=Arf4 PE=1 SV=2 - [ARF4_MOUSE]	395.93	0.6778	1	4	9	71	180	20.4	7.14
Q9EPJ9	ADP-ribosylation factor GTPase-activating protein 1 OS=Mus musculus GN=Arfgap1 PE=1 SV=2 - [ARFG1_MOUSE]	163.57	0.1908	1	6	6	8	414	45.3	5.57
Q99K28	ADP-ribosylation factor GTPase-activating protein 2 OS=Mus musculus GN=Arfgap2 PE=1 SV=1 - [ARFG2_MOUSE]	149.41	0.1192	1	5	5	5	520	56.6	8.18
Q61210	Rho guanine nucleotide exchange factor 1 OS=Mus musculus GN=Arhgef1 PE=1 SV=2 - [ARHG1_MOUSE]	90.48	0.0402	1	3	3	3	920	102.7	5.6
Q60875	Rho guanine nucleotide exchange factor 2 OS=Mus musculus GN=Arhgef2 PE=1 SV=4 - [ARHG2_MOUSE]	432.25	0.1584	1	14	14	20	985	111.9	7.25
Q9ES28	Rho guanine nucleotide exchange factor 7 OS=Mus musculus GN=Arhgef7 PE=1 SV=2 - [ARHG7_MOUSE]	139.57	0.0719	1	4	4	10	862	97	6.8
Q6P9R4	Rho guanine nucleotide exchange factor 18 OS=Mus musculus GN=Arhgef18 PE=2 SV=2 - [ARHGI_MOUSE]	154.11	0.0558	1	4	5	6	1021	114.3	6.21
Q8CG72	Poly(ADP-ribose) glycohydrolase ARH3 OS=Mus musculus GN=Adprhl2 PE=1 SV=1 - [ARHL2_MOUSE]	26.42	0.0243	1	1	1	1	370	39.4	4.96
Q8C142	Low density lipoprotein receptor adapter protein 1 OS=Mus musculus GN=Ldlrap1 PE=1 SV=3 - [ARH_MOUSE]	25.8	0.039	1	1	1	1	308	34	6.58
A2BH40	AT-rich interactive domain-containing protein 1A OS=Mus musculus GN=Arid1a PE=1 SV=1 - [ARI1A_MOUSE]	187.28	0.0232	1	3	4	12	2283	241.9	6.68
Q9Z1K5	E3 ubiquitin-protein ligase ARIH1 OS=Mus musculus GN=Arih1 PE=2 SV=3 - [ARI1_MOUSE]	62.05	0.0342	1	2	2	3	555	64	5.08
P61211	ADP-ribosylation factor-like protein 1 OS=Mus musculus GN=Arl1 PE=2 SV=1 - [ARL1_MOUSE]	135.58	0.1989	1	3	3	4	181	20.4	5.72
Q9D0J4	ADP-ribosylation factor-like protein 2 OS=Mus musculus GN=Arl2 PE=1 SV=1 - [ARL2_MOUSE]	61.34	0.1467	1	3	3	5	184	20.9	5.96
Q9WUL7	ADP-ribosylation factor-like protein 3 OS=Mus musculus GN=Arl3 PE=1 SV=1 - [ARL3_MOUSE]	340.79	0.6868	1	10	10	23	182	20.5	7.24
O88848	ADP-ribosylation factor-like protein 6 OS=Mus musculus GN=Arl6 PE=2 SV=1 - [ARL6_MOUSE]	74.83	0.2258	1	3	3	3	186	20.9	8.25
Q8VEH3	ADP-ribosylation factor-like protein 8A OS=Mus musculus GN=Arl8a PE=2 SV=1 - [ARL8A_MOUSE]	145.61	0.4839	1	2	6	8	186	21.4	7.77
Q91YI0	Argininosuccinate lyase OS=Mus musculus GN=Asl PE=2 SV=1 - [ARLY_MOUSE]	381.93	0.3082	1	14	14	20	464	51.7	6.96
Q9D0L7	Armadillo repeat-containing protein 10 OS=Mus musculus GN=Armc10 PE=1 SV=1 - [ARM10_MOUSE]	183.71	0.1961	1	5	5	12	306	33.3	7.99
Q8BNU0	Armadillo repeat-containing protein 6 OS=Mus musculus GN=Armc6 PE=2 SV=1 - [ARMC6_MOUSE]	70.86	0.0598	1	2	2	2	468	50.7	6
Q9DBR3	Armadillo repeat-containing protein 8 OS=Mus musculus GN=Armc8 PE=2 SV=2 - [ARMC8_MOUSE]	48.07	0.0282	1	1	1	1	673	75.3	6.73
Q8C6B9	Active regulator of SIRT1 OS=Mus musculus GN=Rps19bp1 PE=1 SV=1 - [AROS_MOUSE]	54.04	0.2238	1	2	2	2	143	16	10.83
Q9QZB7	Actin-related protein 10 OS=Mus musculus GN=Actr10 PE=1 SV=2 - [ARP10_MOUSE]	76.47	0.1271	1	3	3	3	417	46.2	7.61
P56212	cAMP-regulated phosphoprotein 19 OS=Mus musculus GN=Arpp19 PE=1 SV=2 - [ARP19_MOUSE]	70.38	0.4018	1	2	3	8	112	12.3	9.09
Q99JY9	Actin-related protein 3 OS=Mus musculus GN=Actr3 PE=1 SV=3 - [ARP3_MOUSE]	650.12	0.6842	2	20	20	50	418	47.3	5.88
Q9D898	Actin-related protein 2/3 complex subunit 5-like protein OS=Mus musculus GN=Arpc5l PE=1 SV=1 - [ARP5L_MOUSE]	88.68	0.1242	1	2	2	3	153	17	6.8
Q9CVB6	Actin-related protein 2/3 complex subunit 2 OS=Mus musculus GN=Arpc2 PE=1 SV=3 - [ARPC2_MOUSE]	326.48	0.35	1	9	9	30	300	34.3	7.36
Q9JM76	Actin-related protein 2/3 complex subunit 3 OS=Mus musculus GN=Arpc3 PE=1 SV=3 - [ARPC3_MOUSE]	285.91	0.3652	1	8	8	23	178	20.5	8.59
Q9CPW4	Actin-related protein 2/3 complex subunit 5 OS=Mus musculus GN=Arpc5 PE=2 SV=3 - [ARPC5_MOUSE]	171.3	0.3311	1	4	4	10	151	16.3	5.67
P50429	Arylsulfatase B OS=Mus musculus GN=Arsb PE=2 SV=3 - [ARSB_MOUSE]	78.55	0.0824	1	4	4	6	534	59.6	7.24
P98203	Armadillo repeat protein deleted in velo-cardio-facial syndrome homolog OS=Mus musculus GN=Arvcf PE=1 SV=2 - [ARVC_MOUSE]	49.67	0.0135	1	1	1	1	962	105	6.64
P50295	Arylamine N-acetyltransferase 2 OS=Mus musculus GN=Nat2 PE=1 SV=1 - [ARY2_MOUSE]	21.63	0.0414	1	1	1	1	290	33.7	5.88
Q9WV54	Acid ceramidase OS=Mus musculus GN=Asah1 PE=1 SV=1 - [ASAH1_MOUSE]	125.63	0.1548	1	5	5	5	394	44.6	8.46
Q9DAP7	Histone chaperone ASF1B OS=Mus musculus GN=Asf1b PE=1 SV=1 - [ASF1B_MOUSE]	22.48	0.099	1	1	1	1	202	22.5	4.44
Q91X20	Set1/Ash2 histone methyltransferase complex subunit ASH2 OS=Mus musculus GN=Ash2l PE=1 SV=1 - [ASH2L_MOUSE]	66.53	0.0706	1	3	3	3	623	68.2	5.69
O54984	ATPase Asna1 OS=Mus musculus GN=Asna1 PE=1 SV=2 - [ASNA_MOUSE]	272.64	0.3793	1	10	10	22	348	38.8	4.91
Q61024	Asparagine synthetase [glutamine-hydrolyzing] OS=Mus musculus GN=Asns PE=2 SV=3 - [ASNS_MOUSE]	428.5	0.2923	1	13	13	24	561	64.2	6.58
Q8VBT9	Tether containing UBX domain for GLUT4 OS=Mus musculus GN=Aspscr1 PE=1 SV=1 - [ASPC1_MOUSE]	28.58	0.0291	1	1	1	2	550	59.8	6.96
Q8BSY0	Aspartyl/asparaginyl beta-hydroxylase OS=Mus musculus GN=Asph PE=2 SV=1 - [ASPH_MOUSE]	73.51	0.0418	1	2	2	2	741	83	5.08
Q8CG79	Apoptosis-stimulating of p53 protein 2 OS=Mus musculus GN=Tp53bp2 PE=1 SV=3 - [ASPP2_MOUSE]	99.39	0.0222	1	2	2	2	1128	125.2	6.34
P98197	Probable phospholipid-transporting ATPase IH OS=Mus musculus GN=Atp11a PE=2 SV=1 - [AT11A_MOUSE]	121.67	0.0362	1	3	3	5	1187	135.4	6.48
Q8VDN2	Sodium/potassium-transporting ATPase subunit alpha-1 OS=Mus musculus GN=Atp1a1 PE=1 SV=1 - [AT1A1_MOUSE]	1083.98	0.305	6	26	26	69	1023	112.9	5.45
P14094	Sodium/potassium-transporting ATPase subunit beta-1 OS=Mus musculus GN=Atp1b1 PE=1 SV=1 - [AT1B1_MOUSE]	129.89	0.1612	1	4	4	9	304	35.2	8.65
P97370	Sodium/potassium-transporting ATPase subunit beta-3 OS=Mus musculus GN=Atp1b3 PE=1 SV=1 - [AT1B3_MOUSE]	145.54	0.1871	1	4	4	11	278	31.8	8.51
O55143	Sarcoplasmic/endoplasmic reticulum calcium ATPase 2 OS=Mus musculus GN=Atp2a2 PE=1 SV=2 - [AT2A2_MOUSE]	435.36	0.1648	3	13	13	26	1044	114.8	5.34
Q9CQQ7	ATP synthase F(0) complex subunit B1, mitochondrial OS=Mus musculus GN=Atp5f1 PE=1 SV=1 - [AT5F1_MOUSE]	188.21	0.2109	1	6	6	19	256	28.9	9.06
Q9CR84	ATP synthase F(0) complex subunit C1, mitochondrial OS=Mus musculus GN=Atp5g1 PE=2 SV=1 - [AT5G1_MOUSE]	28.84	0.0515	3	1	1	2	136	14.2	10.01
Q925I1	ATPase family AAA domain-containing protein 3 OS=Mus musculus GN=Atad3 PE=1 SV=1 - [ATAD3_MOUSE]	77.31	0.0558	1	3	3	5	591	66.7	9.29
Q9Z2A5	Arginyl-tRNA--protein transferase 1 OS=Mus musculus GN=Ate1 PE=1 SV=2 - [ATE1_MOUSE]	15.48	0.0233	1	1	1	1	516	59.1	8.19
Q9CPX6	Ubiquitin-like-conjugating enzyme ATG3 OS=Mus musculus GN=Atg3 PE=1 SV=1 - [ATG3_MOUSE]	105.43	0.1146	1	3	3	7	314	35.8	4.72
Q9D906	Ubiquitin-like modifier-activating enzyme ATG7 OS=Mus musculus GN=Atg7 PE=1 SV=1 - [ATG7_MOUSE]	58.57	0.0201	1	1	1	1	698	77.5	6.4
Q9D8Z6	Autophagy-related protein 101 OS=Mus musculus GN=Atg101 PE=2 SV=1 - [ATGA1_MOUSE]	50.59	0.078	1	1	1	1	218	25	6.15
Q6PA06	Atlastin-2 OS=Mus musculus GN=Atl2 PE=1 SV=1 - [ATLA2_MOUSE]	74.02	0.0532	1	2	3	4	583	66.2	5.43
Q91YH5	Atlastin-3 OS=Mus musculus GN=Atl3 PE=2 SV=1 - [ATLA3_MOUSE]	259.61	0.1922	1	6	7	12	541	60.5	6.1
O35126	Atrophin-1 OS=Mus musculus GN=Atn1 PE=1 SV=1 - [ATN1_MOUSE]	41.6	0.0128	1	1	1	1	1175	123.6	8.95
O08997	Copper transport protein ATOX1 OS=Mus musculus GN=Atox1 PE=2 SV=1 - [ATOX1_MOUSE]	129.09	0.5882	1	4	4	17	68	7.3	6.51
Q9DCX2	ATP synthase subunit d, mitochondrial OS=Mus musculus GN=Atp5h PE=1 SV=3 - [ATP5H_MOUSE]	256.44	0.6708	1	8	8	18	161	18.7	5.69
Q06185	ATP synthase subunit e, mitochondrial OS=Mus musculus GN=Atp5i PE=1 SV=2 - [ATP5I_MOUSE]	110.2	0.338	1	3	3	7	71	8.2	9.35
P97450	ATP synthase-coupling factor 6, mitochondrial OS=Mus musculus GN=Atp5j PE=1 SV=1 - [ATP5J_MOUSE]	54.36	0.2778	1	2	2	5	108	12.5	9.36
Q9CPQ8	ATP synthase subunit g, mitochondrial OS=Mus musculus GN=Atp5l PE=1 SV=1 - [ATP5L_MOUSE]	138.07	0.4951	1	5	5	17	103	11.4	9.74
P03930	ATP synthase protein 8 OS=Mus musculus GN=Mtatp8 PE=1 SV=1 - [ATP8_MOUSE]	43.12	0.2687	1	2	2	3	67	7.8	9.88
Q03265	ATP synthase subunit alpha, mitochondrial OS=Mus musculus GN=Atp5a1 PE=1 SV=1 - [ATPA_MOUSE]	1534.11	0.6763	1	34	34	192	553	59.7	9.19
Q9D3D9	ATP synthase subunit delta, mitochondrial OS=Mus musculus GN=Atp5d PE=1 SV=1 - [ATPD_MOUSE]	126.37	0.375	1	3	3	15	168	17.6	5.08
Q91VR2	ATP synthase subunit gamma, mitochondrial OS=Mus musculus GN=Atp5c1 PE=1 SV=1 - [ATPG_MOUSE]	386.15	0.3356	1	10	10	25	298	32.9	9.01
P56135	ATP synthase subunit f, mitochondrial OS=Mus musculus GN=Atp5j2 PE=1 SV=3 - [ATPK_MOUSE]	49.57	0.2614	1	2	2	6	88	10.3	9.95
Q9DB20	ATP synthase subunit O, mitochondrial OS=Mus musculus GN=Atp5o PE=1 SV=1 - [ATPO_MOUSE]	258.94	0.4836	1	9	9	22	213	23.3	9.99
Q61687	Transcriptional regulator ATRX OS=Mus musculus GN=Atrx PE=1 SV=3 - [ATRX_MOUSE]	128.43	0.0295	1	5	5	7	2476	278.4	6.68
P97857	A disintegrin and metalloproteinase with thrombospondin motifs 1 OS=Mus musculus GN=Adamts1 PE=1 SV=4 - [ATS1_MOUSE]	361.13	0.1415	1	9	9	16	968	105.7	7.83
Q8BNJ2	A disintegrin and metalloproteinase with thrombospondin motifs 4 OS=Mus musculus GN=Adamts4 PE=2 SV=2 - [ATS4_MOUSE]	31.95	0.0228	1	1	1	1	833	90	8.28
P28658	Ataxin-10 OS=Mus musculus GN=Atxn10 PE=1 SV=2 - [ATX10_MOUSE]	261.34	0.1958	1	7	7	22	475	53.7	5.25
Q7TQH0	Ataxin-2-like protein OS=Mus musculus GN=Atxn2l PE=1 SV=1 - [ATX2L_MOUSE]	125.92	0.0877	1	6	6	7	1049	110.6	8.85
O70305	Ataxin-2 OS=Mus musculus GN=Atxn2 PE=1 SV=1 - [ATX2_MOUSE]	192.02	0.0638	1	6	6	6	1285	136.4	9.55
Q62036	5-azacytidine-induced protein 1 OS=Mus musculus GN=Azi1 PE=1 SV=2 - [AZI1_MOUSE]	44.06	0.0189	1	2	2	2	1060	120.2	8.72
Q64373	Bcl-2-like protein 1 OS=Mus musculus GN=Bcl2l1 PE=1 SV=1 - [B2CL1_MOUSE]	38.67	0.0815	1	2	2	3	233	26.1	4.94
P59017	Bcl-2-like protein 13 OS=Mus musculus GN=Bcl2l13 PE=1 SV=2 - [B2L13_MOUSE]	93.68	0.1175	1	4	4	6	434	46.7	4.59
Q91V12	Cytosolic acyl coenzyme A thioester hydrolase OS=Mus musculus GN=Acot7 PE=1 SV=2 - [BACH_MOUSE]	251.89	0.2415	1	7	7	39	381	42.5	8.68
O54962	Barrier-to-autointegration factor OS=Mus musculus GN=Banf1 PE=1 SV=1 - [BAF_MOUSE]	201.67	0.618	1	6	6	32	89	10.1	6.09
Q60739	BAG family molecular chaperone regulator 1 OS=Mus musculus GN=Bag1 PE=1 SV=3 - [BAG1_MOUSE]	77.82	0.0535	1	2	2	2	355	39.7	8.46
Q91YN9	BAG family molecular chaperone regulator 2 OS=Mus musculus GN=Bag2 PE=1 SV=1 - [BAG2_MOUSE]	230.99	0.2762	1	5	5	16	210	23.5	6.42
Q9JLV1	BAG family molecular chaperone regulator 3 OS=Mus musculus GN=Bag3 PE=1 SV=2 - [BAG3_MOUSE]	269.67	0.1889	1	7	7	16	577	61.8	7.27
Q8CI61	BAG family molecular chaperone regulator 4 OS=Mus musculus GN=Bag4 PE=1 SV=2 - [BAG4_MOUSE]	76.64	0.0613	1	2	2	3	457	49.1	5.34
Q9Z1R2	Large proline-rich protein BAG6 OS=Mus musculus GN=Bag6 PE=1 SV=1 - [BAG6_MOUSE]	491.08	0.1967	1	16	16	26	1154	121	5.71
Q8BKX1	Brain-specific angiogenesis inhibitor 1-associated protein 2 OS=Mus musculus GN=Baiap2 PE=1 SV=2 - [BAIP2_MOUSE]	60.61	0.0841	1	3	3	3	535	59.2	9.04
Q80TT2	BAI1-associated protein 3 OS=Mus musculus GN=Baiap3 PE=2 SV=3 - [BAIP3_MOUSE]	24.44	0.0071	1	1	1	3	1134	127	6.2
P18572	Basigin OS=Mus musculus GN=Bsg PE=1 SV=2 - [BASI_MOUSE]	114.25	0.1183	1	4	4	6	389	42.4	5.85
Q91XV3	Brain acid soluble protein 1 OS=Mus musculus GN=Basp1 PE=1 SV=3 - [BASP1_MOUSE]	588.85	0.8894	1	15	15	66	226	22.1	4.51
Q07813	Apoptosis regulator BAX OS=Mus musculus GN=Bax PE=1 SV=1 - [BAX_MOUSE]	54.78	0.0677	1	1	1	3	192	21.4	4.98
Q9Z277	Tyrosine-protein kinase BAZ1B OS=Mus musculus GN=Baz1b PE=1 SV=2 - [BAZ1B_MOUSE]	71.4	0.023	1	3	3	4	1479	170.5	8.6
Q9R069	Basal cell adhesion molecule OS=Mus musculus GN=Bcam PE=2 SV=1 - [BCAM_MOUSE]	34.07	0.0225	1	1	1	1	622	67.6	6.25
Q61140	Breast cancer anti-estrogen resistance protein 1 OS=Mus musculus GN=Bcar1 PE=1 SV=2 - [BCAR1_MOUSE]	322.45	0.151	1	9	9	17	874	94.2	5.68
P24288	Branched-chain-amino-acid aminotransferase, cytosolic OS=Mus musculus GN=Bcat1 PE=2 SV=2 - [BCAT1_MOUSE]	241.82	0.1943	1	7	7	27	386	42.8	5.39
Q921K9	B-cell CLL/lymphoma 7 protein family member B OS=Mus musculus GN=Bcl7b PE=1 SV=1 - [BCL7B_MOUSE]	32.59	0.0743	1	1	1	1	202	22.2	4.75
Q8K019	Bcl-2-associated transcription factor 1 OS=Mus musculus GN=Bclaf1 PE=1 SV=2 - [BCLF1_MOUSE]	100.69	0.0544	1	6	6	8	919	105.9	9.99
Q8JZV9	3-hydroxybutyrate dehydrogenase type 2 OS=Mus musculus GN=Bdh2 PE=1 SV=1 - [BDH2_MOUSE]	36.39	0.0531	1	1	1	1	245	26.7	7.99
Q921C5	Protein bicaudal D homolog 2 OS=Mus musculus GN=Bicd2 PE=1 SV=1 - [BICD2_MOUSE]	85.93	0.05	2	3	4	5	820	93.3	5.44
P70444	BH3-interacting domain death agonist OS=Mus musculus GN=Bid PE=1 SV=2 - [BID_MOUSE]	205.03	0.3692	1	4	4	12	195	21.9	4.81
Q9CY64	Biliverdin reductase A OS=Mus musculus GN=Blvra PE=2 SV=1 - [BIEA_MOUSE]	141.08	0.2102	1	5	5	7	295	33.5	7.02
O08539	Myc box-dependent-interacting protein 1 OS=Mus musculus GN=Bin1 PE=1 SV=1 - [BIN1_MOUSE]	361.86	0.3418	1	13	13	26	588	64.4	5.03
Q62210	Baculoviral IAP repeat-containing protein 2 OS=Mus musculus GN=Birc2 PE=1 SV=1 - [BIRC2_MOUSE]	13.45	0.0278	1	1	1	2	612	69.6	6.54
O88738	Baculoviral IAP repeat-containing protein 6 OS=Mus musculus GN=Birc6 PE=1 SV=2 - [BIRC6_MOUSE]	260.13	0.0246	1	9	9	10	4882	531.8	6.07
Q8R016	Bleomycin hydrolase OS=Mus musculus GN=Blmh PE=2 SV=1 - [BLMH_MOUSE]	120.68	0.1033	1	4	4	5	455	52.5	6.48
Q9D8S9	BolA-like protein 1 OS=Mus musculus GN=Bola1 PE=1 SV=1 - [BOLA1_MOUSE]	130.45	0.292	1	4	4	6	137	14.4	8.76
Q8BGS2	BolA-like protein 2 OS=Mus musculus GN=Bola2 PE=1 SV=1 - [BOLA2_MOUSE]	63.98	0.3837	1	2	3	3	86	10.2	6.16
P97452	Ribosome biogenesis protein BOP1 OS=Mus musculus GN=Bop1 PE=1 SV=1 - [BOP1_MOUSE]	103.66	0.1066	1	5	5	7	732	82.5	6.28
Q9JM96	Cdc42 effector protein 4 OS=Mus musculus GN=Cdc42ep4 PE=1 SV=1 - [BORG4_MOUSE]	127.96	0.1347	1	3	3	3	349	37.8	5.36
Q91W92	Cdc42 effector protein 1 OS=Mus musculus GN=Cdc42ep1 PE=1 SV=1 - [BORG5_MOUSE]	24.17	0.0465	1	1	1	1	409	43.1	7.21
Q8R164	Valacyclovir hydrolase OS=Mus musculus GN=Bphl PE=1 SV=1 - [BPHL_MOUSE]	85.81	0.1271	1	3	3	6	291	32.8	8.94
Q9Z0S1	3'(2'),5'-bisphosphate nucleotidase 1 OS=Mus musculus GN=Bpnt1 PE=1 SV=2 - [BPNT1_MOUSE]	177.49	0.224	1	6	6	12	308	33.2	5.82
Q8C3R1	BRCA1-associated ATM activator 1 OS=Mus musculus GN=Brat1 PE=2 SV=1 - [BRAT1_MOUSE]	52.75	0.0462	1	2	2	3	822	89	5.31
Q8K2F0	Bromodomain-containing protein 3 OS=Mus musculus GN=Brd3 PE=1 SV=2 - [BRD3_MOUSE]	77.49	0.0702	1	2	4	5	726	79.7	9.36
Q3U319	E3 ubiquitin-protein ligase BRE1B OS=Mus musculus GN=Rnf40 PE=2 SV=2 - [BRE1B_MOUSE]	79.26	0.031	2	2	2	5	1001	113.9	6.48
Q8K3W0	BRCA1-A complex subunit BRE OS=Mus musculus GN=Bre PE=1 SV=2 - [BRE_MOUSE]	64.66	0.0731	1	2	2	3	383	43.5	5.94
Q9DCA5	Ribosome biogenesis protein BRX1 homolog OS=Mus musculus GN=Brix1 PE=2 SV=3 - [BRX1_MOUSE]	20.14	0.0198	1	1	1	1	353	41.2	10.02
Q64152	Transcription factor BTF3 OS=Mus musculus GN=Btf3 PE=1 SV=3 - [BTF3_MOUSE]	197.33	0.451	2	7	7	13	204	22	9.52
O08901	Mitotic checkpoint serine/threonine-protein kinase BUB1 OS=Mus musculus GN=Bub1 PE=2 SV=1 - [BUB1_MOUSE]	23.42	0.0161	1	1	1	1	1058	119.5	6.1
O54825	Bystin OS=Mus musculus GN=Bysl PE=1 SV=3 - [BYST_MOUSE]	103.51	0.1216	1	4	4	6	436	49.8	7.78
Q91VK1	Basic leucine zipper and W2 domain-containing protein 2 OS=Mus musculus GN=Bzw2 PE=1 SV=1 - [BZW2_MOUSE]	129.16	0.0979	1	2	4	9	419	48	6.68
O35127	Protein C10 OS=Mus musculus GN=Grcc10 PE=2 SV=1 - [C10_MOUSE]	68.32	0.1429	1	1	1	2	126	13.2	5.14
Q8CI33	CWF19-like protein 1 OS=Mus musculus GN=Cwf19l1 PE=2 SV=2 - [C19L1_MOUSE]	127.09	0.1229	1	5	5	5	537	60.2	7.14
O35658	Complement component 1 Q subcomponent-binding protein, mitochondrial OS=Mus musculus GN=C1qbp PE=1 SV=1 - [C1QBP_MOUSE]	171.45	0.2662	1	4	4	25	278	31	4.92
Q922D8	C-1-tetrahydrofolate synthase, cytoplasmic OS=Mus musculus GN=Mthfd1 PE=1 SV=4 - [C1TC_MOUSE]	573.17	0.231	1	17	17	28	935	101.1	7.14
Q3V3R1	Monofunctional C1-tetrahydrofolate synthase, mitochondrial OS=Mus musculus GN=Mthfd1l PE=1 SV=2 - [C1TM_MOUSE]	522.17	0.2108	1	14	14	23	977	105.7	7.02
Q8K1A6	Coiled-coil and C2 domain-containing protein 1A OS=Mus musculus GN=Cc2d1a PE=1 SV=2 - [C2D1A_MOUSE]	43.87	0.0212	1	1	1	1	943	103.6	7.84
Q9EQG9	Collagen type IV alpha-3-binding protein OS=Mus musculus GN=Col4a3bp PE=1 SV=1 - [C43BP_MOUSE]	65.35	0.0721	1	4	4	4	624	71.1	5.44
Q8BHG2	UPF0587 protein C1orf123 homolog OS=Mus musculus PE=2 SV=1 - [CA123_MOUSE]	25.81	0.1	1	1	1	1	160	18	5.12
Q6NXN1	SUZ domain-containing protein 1 OS=Mus musculus GN=Szrd1 PE=1 SV=1 - [SZRD1_MOUSE]	74.84	0.1316	1	2	2	3	152	17	9
Q8C3W1	Uncharacterized protein C1orf198 homolog OS=Mus musculus PE=2 SV=1 - [CA198_MOUSE]	52.4	0.0652	1	2	2	4	322	35.3	5.24
Q06138	Calcium-binding protein 39 OS=Mus musculus GN=Cab39 PE=1 SV=2 - [CAB39_MOUSE]	76.49	0.0821	2	3	3	3	341	39.8	6.89
Q8CGU1	Calcium-binding and coiled-coil domain-containing protein 1 OS=Mus musculus GN=Calcoco1 PE=1 SV=2 - [CACO1_MOUSE]	51.82	0.0376	1	2	2	2	691	77.2	4.82
P15116	Cadherin-2 OS=Mus musculus GN=Cdh2 PE=1 SV=2 - [CADH2_MOUSE]	106.22	0.0541	1	3	3	5	906	99.7	4.78
Q9QWF0	Chromatin assembly factor 1 subunit A OS=Mus musculus GN=Chaf1a PE=1 SV=1 - [CAF1A_MOUSE]	49.7	0.022	1	1	1	1	911	101.9	5.4
Q9D0N7	Chromatin assembly factor 1 subunit B OS=Mus musculus GN=Chaf1b PE=2 SV=1 - [CAF1B_MOUSE]	65.87	0.0647	1	3	3	3	572	63.1	6.55
P00920	Carbonic anhydrase 2 OS=Mus musculus GN=Ca2 PE=1 SV=4 - [CAH2_MOUSE]	82.11	0.1615	1	2	2	3	260	29	7.01
P14211	Calreticulin OS=Mus musculus GN=Calr PE=1 SV=1 - [CALR_MOUSE]	601.58	0.5096	1	19	19	109	416	48	4.49
O35887	Calumenin OS=Mus musculus GN=Calu PE=1 SV=1 - [CALU_MOUSE]	235.9	0.2921	1	8	8	30	315	37	4.67
P35564	Calnexin OS=Mus musculus GN=Canx PE=1 SV=1 - [CALX_MOUSE]	642.24	0.2995	1	21	21	57	591	67.2	4.64
P49070	Calcium signal-modulating cyclophilin ligand OS=Mus musculus GN=Camlg PE=1 SV=2 - [CAMLG_MOUSE]	57.28	0.0748	1	1	1	1	294	32.5	7.74
A2AHC3	Calmodulin-regulated spectrin-associated protein 1 OS=Mus musculus GN=Camsap1 PE=1 SV=1 - [CAMP1_MOUSE]	64.04	0.0127	1	1	1	2	1581	175.8	6.95
O35350	Calpain-1 catalytic subunit OS=Mus musculus GN=Capn1 PE=1 SV=1 - [CAN1_MOUSE]	367.11	0.1669	1	10	10	16	713	82.1	5.87
O08529	Calpain-2 catalytic subunit OS=Mus musculus GN=Capn2 PE=2 SV=4 - [CAN2_MOUSE]	691.07	0.3057	1	16	16	38	700	79.8	4.96
O08688	Calpain-5 OS=Mus musculus GN=Capn5 PE=2 SV=1 - [CAN5_MOUSE]	105.33	0.0953	1	4	4	5	640	72.9	7.36
Q6ZQ38	Cullin-associated NEDD8-dissociated protein 1 OS=Mus musculus GN=Cand1 PE=2 SV=2 - [CAND1_MOUSE]	973.35	0.3	1	27	27	68	1230	136.2	5.78
Q6ZQ73	Cullin-associated NEDD8-dissociated protein 2 OS=Mus musculus GN=Cand2 PE=1 SV=2 - [CAND2_MOUSE]	26.24	0.0065	1	1	1	1	1235	135.5	5.58
P40124	Adenylyl cyclase-associated protein 1 OS=Mus musculus GN=Cap1 PE=1 SV=4 - [CAP1_MOUSE]	563.16	0.4177	1	13	14	56	474	51.5	7.52
Q9CYT6	Adenylyl cyclase-associated protein 2 OS=Mus musculus GN=Cap2 PE=1 SV=1 - [CAP2_MOUSE]	46.12	0.0315	1	1	2	2	476	52.8	6.43
P24452	Macrophage-capping protein OS=Mus musculus GN=Capg PE=1 SV=2 - [CAPG_MOUSE]	294.71	0.2983	1	8	8	28	352	39.2	7.2
Q60865	Caprin-1 OS=Mus musculus GN=Caprin1 PE=1 SV=2 - [CAPR1_MOUSE]	393.76	0.1825	1	12	12	35	707	78.1	5.25
P47757	F-actin-capping protein subunit beta OS=Mus musculus GN=Capzb PE=1 SV=3 - [CAPZB_MOUSE]	343.21	0.4801	1	10	10	36	277	31.3	5.74
Q8BI72	CDKN2A-interacting protein OS=Mus musculus GN=Cdkn2aip PE=2 SV=1 - [CARF_MOUSE]	47.28	0.0782	1	2	2	3	563	59.7	9.16
Q9WVG6	Histone-arginine methyltransferase CARM1 OS=Mus musculus GN=Carm1 PE=1 SV=2 - [CARM1_MOUSE]	56.15	0.0362	1	1	1	1	608	65.8	6.77
P70677	Caspase-3 OS=Mus musculus GN=Casp3 PE=1 SV=1 - [CASP3_MOUSE]	512.03	0.4585	2	11	12	28	277	31.5	6.92
O08738	Caspase-6 OS=Mus musculus GN=Casp6 PE=2 SV=1 - [CASP6_MOUSE]	234.01	0.2645	2	6	7	19	276	31.6	6.89
P97864	Caspase-7 OS=Mus musculus GN=Casp7 PE=1 SV=2 - [CASP7_MOUSE]	31.4	0.0264	1	1	1	1	303	34	6.33
O89110	Caspase-8 OS=Mus musculus GN=Casp8 PE=1 SV=1 - [CASP8_MOUSE]	160.03	0.1292	1	6	6	12	480	55.3	5.25
P24270	Catalase OS=Mus musculus GN=Cat PE=1 SV=4 - [CATA_MOUSE]	370.96	0.296	1	12	12	22	527	59.8	7.88
P10605	Cathepsin B OS=Mus musculus GN=Ctsb PE=1 SV=2 - [CATB_MOUSE]	168.85	0.1858	1	4	4	12	339	37.3	5.91
P18242	Cathepsin D OS=Mus musculus GN=Ctsd PE=1 SV=1 - [CATD_MOUSE]	439.78	0.3317	1	10	10	34	410	44.9	7.15
P06797	Cathepsin L1 OS=Mus musculus GN=Ctsl PE=1 SV=2 - [CATL1_MOUSE]	91.73	0.0868	1	2	2	3	334	37.5	6.83
P49817	Caveolin-1 OS=Mus musculus GN=Cav1 PE=1 SV=1 - [CAV1_MOUSE]	93.19	0.2528	1	3	3	5	178	20.5	6.02
P47753	F-actin-capping protein subunit alpha-1 OS=Mus musculus GN=Capza1 PE=1 SV=4 - [CAZA1_MOUSE]	278.66	0.3566	1	6	7	19	286	32.9	5.55
P47754	F-actin-capping protein subunit alpha-2 OS=Mus musculus GN=Capza2 PE=1 SV=3 - [CAZA2_MOUSE]	201.98	0.3636	1	6	7	15	286	32.9	5.85
Q9CWN7	CCR4-NOT transcription complex subunit 11 OS=Mus musculus GN=Cnot11 PE=2 SV=1 - [CNO11_MOUSE]	39.61	0.0416	1	2	2	2	505	54.9	6.55
O89001	Carboxypeptidase D OS=Mus musculus GN=Cpd PE=1 SV=2 - [CBPD_MOUSE]	82.43	0.0232	1	3	3	5	1377	152.3	6.18
P48758	Carbonyl reductase [NADPH] 1 OS=Mus musculus GN=Cbr1 PE=1 SV=3 - [CBR1_MOUSE]	133.4	0.2274	1	5	5	6	277	30.6	8.31
Q8K354	Carbonyl reductase [NADPH] 3 OS=Mus musculus GN=Cbr3 PE=2 SV=1 - [CBR3_MOUSE]	131.97	0.2491	1	4	4	5	277	30.9	6.57
Q8VEH6	COBW domain-containing protein 1 OS=Mus musculus GN=Cbwd1 PE=2 SV=1 - [CBWD1_MOUSE]	115.91	0.145	1	4	4	4	393	43.7	4.89
P23198	Chromobox protein homolog 3 OS=Mus musculus GN=Cbx3 PE=1 SV=2 - [CBX3_MOUSE]	307.4	0.3607	1	5	6	41	183	20.8	5.22
Q61686	Chromobox protein homolog 5 OS=Mus musculus GN=Cbx5 PE=1 SV=1 - [CBX5_MOUSE]	146.96	0.2618	1	4	4	14	191	22.2	5.86
Q8VE99	Coiled-coil domain-containing protein 115 OS=Mus musculus GN=Ccdc115 PE=2 SV=1 - [CC115_MOUSE]	93.55	0.2444	1	3	3	4	180	19.7	8.81
Q9D8X2	Coiled-coil domain-containing protein 124 OS=Mus musculus GN=Ccdc124 PE=2 SV=1 - [CC124_MOUSE]	51.78	0.0599	1	1	1	1	217	25.3	9.64
Q8CI71	Coiled-coil domain-containing protein 132 OS=Mus musculus GN=Ccdc132 PE=2 SV=2 - [CC132_MOUSE]	31.85	0.0083	1	1	1	2	964	111.1	6.07
Q8VEK0	Cell cycle control protein 50A OS=Mus musculus GN=Tmem30a PE=1 SV=1 - [CC50A_MOUSE]	25.55	0.044	1	1	1	1	364	41	8.37
Q8CH18	Cell division cycle and apoptosis regulator protein 1 OS=Mus musculus GN=Ccar1 PE=1 SV=1 - [CCAR1_MOUSE]	114.79	0.0445	1	4	4	5	1146	132	5.76
Q9JIG7	Coiled-coil domain-containing protein 22 OS=Mus musculus GN=Ccdc22 PE=1 SV=1 - [CCD22_MOUSE]	60.47	0.0335	1	2	2	3	627	70.8	6.01
Q9D024	Coiled-coil domain-containing protein 47 OS=Mus musculus GN=Ccdc47 PE=2 SV=2 - [CCD47_MOUSE]	62.77	0.0704	1	3	3	3	483	55.8	4.84
Q810U5	Coiled-coil domain-containing protein 50 OS=Mus musculus GN=Ccdc50 PE=1 SV=1 - [CCD50_MOUSE]	81.91	0.0656	1	2	2	5	305	35.3	6.89
Q8R2G6	Coiled-coil domain-containing protein 80 OS=Mus musculus GN=Ccdc80 PE=1 SV=2 - [CCD80_MOUSE]	75.78	0.04	1	3	3	4	949	107.5	9.58
Q9D8L5	Coiled-coil domain-containing protein 91 OS=Mus musculus GN=Ccdc91 PE=2 SV=2 - [CCD91_MOUSE]	25.37	0.0181	1	1	1	1	442	50	5.07
Q7TQK5	Coiled-coil domain-containing protein 93 OS=Mus musculus GN=Ccdc93 PE=2 SV=1 - [CCD93_MOUSE]	63.83	0.0509	1	3	3	3	629	72.6	8.29
D3YZP9	Coiled-coil domain-containing protein 6 OS=Mus musculus GN=Ccdc6 PE=1 SV=1 - [CCDC6_MOUSE]	81.48	0.0768	1	3	3	3	469	52.9	7.34
Q9WU84	Copper chaperone for superoxide dismutase OS=Mus musculus GN=Ccs PE=2 SV=1 - [CCS_MOUSE]	56.76	0.1277	1	2	2	2	274	28.9	6.1
Q8CFE2	UPF0609 protein C4orf27 homolog OS=Mus musculus PE=2 SV=1 - [CD027_MOUSE]	89.18	0.0607	1	2	2	2	346	39.3	7.69
Q8CII2	Cell division cycle protein 123 homolog OS=Mus musculus GN=Cdc123 PE=2 SV=2 - [CD123_MOUSE]	118.39	0.0833	1	2	3	8	336	38.8	4.67
O35566	CD151 antigen OS=Mus musculus GN=Cd151 PE=2 SV=2 - [CD151_MOUSE]	26.32	0.0316	1	1	1	1	253	28.2	7.47
Q64364	Cyclin-dependent kinase inhibitor 2A, isoform 3 OS=Mus musculus GN=Cdkn2a PE=1 SV=1 - [CD2A2_MOUSE]	62.93	0.0828	1	1	1	5	169	19.2	12.16
Q9JLQ0	CD2-associated protein OS=Mus musculus GN=Cd2ap PE=1 SV=3 - [CD2AP_MOUSE]	444.6	0.2135	1	12	12	21	637	70.4	6.38
P15379	CD44 antigen OS=Mus musculus GN=Cd44 PE=1 SV=3 - [CD44_MOUSE]	113.1	0.0373	1	3	3	13	778	85.6	4.96
P41731	CD63 antigen OS=Mus musculus GN=Cd63 PE=1 SV=2 - [CD63_MOUSE]	45.44	0.0252	1	1	1	3	238	25.7	6.98
P40237	CD82 antigen OS=Mus musculus GN=Cd82 PE=1 SV=1 - [CD82_MOUSE]	33.34	0.0752	1	2	2	3	266	29.6	5.02
Q9Z0M6	CD97 antigen OS=Mus musculus GN=Cd97 PE=1 SV=2 - [CD97_MOUSE]	40.82	0.0147	1	1	1	1	818	90.4	7.39
P40240	CD9 antigen OS=Mus musculus GN=Cd9 PE=1 SV=2 - [CD9_MOUSE]	50.2	0.1106	1	1	1	8	226	25.2	7.23
Q8BGZ4	Cell division cycle protein 23 homolog OS=Mus musculus GN=Cdc23 PE=1 SV=2 - [CDC23_MOUSE]	29.03	0.0218	1	1	1	1	597	68.5	7.18
Q99JP4	Anaphase-promoting complex subunit CDC26 OS=Mus musculus GN=Cdc26 PE=2 SV=1 - [CDC26_MOUSE]	87.15	0.3882	1	2	2	3	85	9.8	6.81
Q61081	Hsp90 co-chaperone Cdc37 OS=Mus musculus GN=Cdc37 PE=2 SV=1 - [CDC37_MOUSE]	316.52	0.2929	1	8	8	35	379	44.6	5.34
Q6A068	Cell division cycle 5-like protein OS=Mus musculus GN=Cdc5l PE=1 SV=2 - [CDC5L_MOUSE]	412.62	0.2032	1	12	12	16	802	92.1	8.02
Q14AX6	Cyclin-dependent kinase 12 OS=Mus musculus GN=Cdk12 PE=1 SV=2 - [CDK12_MOUSE]	88.72	0.0142	14	1	2	7	1484	163.6	9.47
Q69ZA1	Cyclin-dependent kinase 13 OS=Mus musculus GN=Cdk13 PE=1 SV=3 - [CDK13_MOUSE]	72.14	0.0205	14	1	2	7	1511	164.5	9.69
Q04899	Cyclin-dependent kinase 18 OS=Mus musculus GN=Cdk18 PE=1 SV=1 - [CDK18_MOUSE]	85.05	0.0576	14	1	2	7	451	51.8	8.51
P11440	Cyclin-dependent kinase 1 OS=Mus musculus GN=Cdk1 PE=1 SV=3 - [CDK1_MOUSE]	384.84	0.3872	15	7	10	29	297	34.1	8.43
P97377	Cyclin-dependent kinase 2 OS=Mus musculus GN=Cdk2 PE=1 SV=2 - [CDK2_MOUSE]	218.42	0.2543	16	4	7	16	346	39	8.54
P30285	Cyclin-dependent kinase 4 OS=Mus musculus GN=Cdk4 PE=1 SV=1 - [CDK4_MOUSE]	143.11	0.1584	14	3	4	13	303	33.7	6.62
P49615	Cyclin-dependent kinase 5 OS=Mus musculus GN=Cdk5 PE=1 SV=1 - [CDK5_MOUSE]	78.56	0.1164	14	2	3	8	292	33.3	7.66
Q64261	Cyclin-dependent kinase 6 OS=Mus musculus GN=Cdk6 PE=1 SV=2 - [CDK6_MOUSE]	157.61	0.2638	14	5	6	12	326	37	6.62
Q99J95	Cyclin-dependent kinase 9 OS=Mus musculus GN=Cdk9 PE=1 SV=1 - [CDK9_MOUSE]	89.69	0.0618	14	1	2	7	372	42.7	8.79
Q8BLF2	Cyclin-dependent kinase-like 3 OS=Mus musculus GN=Cdkl3 PE=2 SV=2 - [CDKL3_MOUSE]	28.16	0.0101	2	1	1	1	595	67.7	9.31
Q99L43	Phosphatidate cytidylyltransferase 2 OS=Mus musculus GN=Cds2 PE=1 SV=1 - [CDS2_MOUSE]	42.57	0.0428	1	1	1	2	444	51.3	7.05
Q4VAA2	Protein CDV3 OS=Mus musculus GN=Cdv3 PE=1 SV=2 - [CDV3_MOUSE]	141.93	0.3096	1	5	5	11	281	29.7	6.1
Q6A065	Centrosomal protein of 170 kDa OS=Mus musculus GN=Cep170 PE=1 SV=2 - [CE170_MOUSE]	130.86	0.0302	1	4	4	5	1588	174.9	7.17
P53569	CCAAT/enhancer-binding protein zeta OS=Mus musculus GN=Cebpz PE=1 SV=2 - [CEBPZ_MOUSE]	131.67	0.0542	1	5	5	8	1052	120.2	5.74
Q91WM2	Cat eye syndrome critical region protein 5 homolog OS=Mus musculus GN=Cecr5 PE=2 SV=1 - [CECR5_MOUSE]	85.06	0.0597	1	2	2	3	419	46.3	7.88
P28659	CUGBP Elav-like family member 1 OS=Mus musculus GN=Celf1 PE=1 SV=2 - [CELF1_MOUSE]	133.28	0.0823	1	5	5	11	486	52.1	8.46
Q8BT07	Centrosomal protein of 55 kDa OS=Mus musculus GN=Cep55 PE=1 SV=2 - [CEP55_MOUSE]	77.77	0.0866	1	3	3	4	462	53.9	7.94
Q9R1K9	Centrin-2 OS=Mus musculus GN=Cetn2 PE=2 SV=1 - [CETN2_MOUSE]	89.79	0.2267	2	3	3	3	172	19.8	5
O88271	Craniofacial development protein 1 OS=Mus musculus GN=Cfdp1 PE=1 SV=1 - [CFDP1_MOUSE]	176.96	0.2712	1	5	5	13	295	32.9	4.86
Q8BHG9	CGG triplet repeat-binding protein 1 OS=Mus musculus GN=Cggbp1 PE=2 SV=1 - [CGBP1_MOUSE]	94.55	0.3054	1	4	4	4	167	18.7	8.95
Q6AW69	Cingulin-like protein 1 OS=Mus musculus GN=Cgnl1 PE=1 SV=2 - [CGNL1_MOUSE]	10.65	0.0085	1	1	1	1	1298	148.1	5.77
Q64433	10 kDa heat shock protein, mitochondrial OS=Mus musculus GN=Hspe1 PE=1 SV=2 - [CH10_MOUSE]	316.59	0.7255	1	9	9	53	102	11	8.35
Q99LU0	Charged multivesicular body protein 1b-1 OS=Mus musculus GN=Chmp1b1 PE=1 SV=1 - [CH1B1_MOUSE]	21.62	0.0452	2	1	1	1	199	22.1	8.1
P63038	60 kDa heat shock protein, mitochondrial OS=Mus musculus GN=Hspd1 PE=1 SV=1 - [CH60_MOUSE]	1707.76	0.6998	1	36	36	249	573	60.9	6.18
Q8K327	Chromosome alignment-maintaining phosphoprotein 1 OS=Mus musculus GN=Champ1 PE=1 SV=1 - [CHAP1_MOUSE]	51.45	0.0287	1	2	2	3	802	87.5	7.85
Q9D1L0	Coiled-coil-helix-coiled-coil-helix domain-containing protein 2, mitochondrial OS=Mus musculus GN=Chchd2 PE=2 SV=1 - [CHCH2_MOUSE]	148.66	0.3072	1	3	3	10	153	15.7	9.66
Q9CRB9	Coiled-coil-helix-coiled-coil-helix domain-containing protein 3, mitochondrial OS=Mus musculus GN=Chchd3 PE=1 SV=1 - [CHCH3_MOUSE]	176.94	0.2907	1	6	6	11	227	26.3	8.37
P40201	Chromodomain-helicase-DNA-binding protein 1 OS=Mus musculus GN=Chd1 PE=1 SV=3 - [CHD1_MOUSE]	29.33	0.014	1	2	2	2	1711	196.3	7.37
Q6PDQ2	Chromodomain-helicase-DNA-binding protein 4 OS=Mus musculus GN=Chd4 PE=1 SV=1 - [CHD4_MOUSE]	486.95	0.093	1	16	16	26	1915	217.6	5.81
Q8CGZ0	Calcium homeostasis endoplasmic reticulum protein OS=Mus musculus GN=Cherp PE=1 SV=1 - [CHERP_MOUSE]	190.5	0.078	1	6	6	10	936	106.1	9.14
Q9WUD1	STIP1 homology and U box-containing protein 1 OS=Mus musculus GN=Stub1 PE=1 SV=1 - [CHIP_MOUSE]	168.69	0.2697	1	5	6	8	304	34.9	6.01
Q921W0	Charged multivesicular body protein 1a OS=Mus musculus GN=Chmp1a PE=1 SV=1 - [CHM1A_MOUSE]	66.34	0.1224	1	3	3	4	196	21.6	8.06
Q9DB34	Charged multivesicular body protein 2a OS=Mus musculus GN=Chmp2a PE=1 SV=1 - [CHM2A_MOUSE]	66.45	0.1126	1	2	2	2	222	25.1	5.97
Q8BJF9	Charged multivesicular body protein 2b OS=Mus musculus GN=Chmp2b PE=1 SV=1 - [CHM2B_MOUSE]	35.56	0.0469	1	1	1	2	213	23.9	8.78
Q9D8B3	Charged multivesicular body protein 4b OS=Mus musculus GN=Chmp4b PE=2 SV=2 - [CHM4B_MOUSE]	122.47	0.1964	1	4	4	6	224	24.9	4.82
Q9CQ10	Charged multivesicular body protein 3 OS=Mus musculus GN=Chmp3 PE=1 SV=3 - [CHMP3_MOUSE]	43.25	0.0536	1	1	1	2	224	25.2	5.06
Q9D7S9	Charged multivesicular body protein 5 OS=Mus musculus GN=Chmp5 PE=2 SV=1 - [CHMP5_MOUSE]	114.49	0.1872	1	4	4	5	219	24.6	4.79
P61022	Calcineurin B homologous protein 1 OS=Mus musculus GN=Chp1 PE=1 SV=2 - [CHP1_MOUSE]	60.93	0.1128	1	2	2	2	195	22.4	5.1
Q9D1P4	Cysteine and histidine-rich domain-containing protein 1 OS=Mus musculus GN=Chordc1 PE=1 SV=1 - [CHRD1_MOUSE]	79.1	0.1208	1	4	4	7	331	37.3	7.9
Q9CR86	Calcium-regulated heat stable protein 1 OS=Mus musculus GN=Carhsp1 PE=1 SV=1 - [CHSP1_MOUSE]	93.02	0.1622	1	2	2	17	148	16.1	8.21
Q8VCE4	Uncharacterized protein C9orf40 homolog OS=Mus musculus PE=2 SV=1 - [CI040_MOUSE]	31.8	0.0859	1	1	1	3	163	18	4.75
Q80UY1	UPF0586 protein C9orf41 homolog OS=Mus musculus PE=2 SV=1 - [CI041_MOUSE]	56.86	0.0875	1	3	3	3	400	46.3	6.16
P59242	Cingulin OS=Mus musculus GN=Cgn PE=1 SV=1 - [CING_MOUSE]	68.17	0.0269	1	3	3	3	1191	136.4	5.91
Q8BWY9	Protein CIP2A OS=Mus musculus GN=Kiaa1524 PE=2 SV=3 - [CIP2A_MOUSE]	66.23	0.0298	1	3	3	3	907	102	6.28
Q8R2N2	Cirhin OS=Mus musculus GN=Cirh1a PE=2 SV=3 - [CIR1A_MOUSE]	22.61	0.0204	1	1	1	3	686	76.9	8.87
P60824	Cold-inducible RNA-binding protein OS=Mus musculus GN=Cirbp PE=1 SV=1 - [CIRBP_MOUSE]	80.79	0.2035	1	2	2	3	172	18.6	9.61
Q91WS0	CDGSH iron-sulfur domain-containing protein 1 OS=Mus musculus GN=Cisd1 PE=1 SV=1 - [CISD1_MOUSE]	33.07	0.0833	1	1	1	1	108	12.1	9.06
Q9CZU6	Citrate synthase, mitochondrial OS=Mus musculus GN=Cs PE=1 SV=1 - [CISY_MOUSE]	453.29	0.3621	1	12	12	48	464	51.7	8.57
Q91V76	Ester hydrolase C11orf54 homolog OS=Mus musculus PE=2 SV=1 - [CK054_MOUSE]	74.7	0.1302	1	2	2	3	315	35	6.29
Q8VD62	UPF0696 protein C11orf68 homolog OS=Mus musculus GN=Bles03 PE=2 SV=1 - [CK068_MOUSE]	32.69	0.0438	1	1	1	2	251	27.5	5.47
Q99LM2	CDK5 regulatory subunit-associated protein 3 OS=Mus musculus GN=Cdk5rap3 PE=2 SV=1 - [CK5P3_MOUSE]	92.95	0.0795	1	3	3	4	503	57	4.83
Q8BMK4	Cytoskeleton-associated protein 4 OS=Mus musculus GN=Ckap4 PE=2 SV=2 - [CKAP4_MOUSE]	340.69	0.2174	1	11	11	19	575	63.7	5.64
A2AGT5	Cytoskeleton-associated protein 5 OS=Mus musculus GN=Ckap5 PE=2 SV=1 - [CKAP5_MOUSE]	201.67	0.062	1	8	9	9	2032	225.5	7.96
P61025	Cyclin-dependent kinases regulatory subunit 1 OS=Mus musculus GN=Cks1b PE=2 SV=1 - [CKS1_MOUSE]	57.75	0.2785	1	2	2	5	79	9.7	8.94
Q8BRT1	CLIP-associating protein 2 OS=Mus musculus GN=Clasp2 PE=1 SV=1 - [CLAP2_MOUSE]	52.64	0.0288	1	2	2	2	1286	140.7	8.63
Q6IRU5	Clathrin light chain B OS=Mus musculus GN=Cltb PE=2 SV=1 - [CLCB_MOUSE]	92.57	0.2052	1	5	5	8	229	25.2	4.63
Q9WVD4	H(+)/Cl(-) exchange transporter 5 OS=Mus musculus GN=Clcn5 PE=2 SV=1 - [CLCN5_MOUSE]	44.16	0.0188	2	2	2	2	746	83	7.01
Q68FD5	Clathrin heavy chain 1 OS=Mus musculus GN=Cltc PE=1 SV=3 - [CLH1_MOUSE]	2617.74	0.4579	1	62	62	235	1675	191.4	5.69
Q9Z1Q5	Chloride intracellular channel protein 1 OS=Mus musculus GN=Clic1 PE=1 SV=3 - [CLIC1_MOUSE]	635.26	0.556	1	12	12	63	241	27	5.17
Q9QYB1	Chloride intracellular channel protein 4 OS=Mus musculus GN=Clic4 PE=1 SV=3 - [CLIC4_MOUSE]	187.85	0.2885	1	5	6	13	253	28.7	5.59
Q8BXK9	Chloride intracellular channel protein 5 OS=Mus musculus GN=Clic5 PE=1 SV=1 - [CLIC5_MOUSE]	57.25	0.0996	2	1	2	3	251	28.3	5.94
Q922J3	CAP-Gly domain-containing linker protein 1 OS=Mus musculus GN=Clip1 PE=1 SV=1 - [CLIP1_MOUSE]	193.23	0.0575	1	3	6	6	1391	155.7	5.24
Q9Z0H8	CAP-Gly domain-containing linker protein 2 OS=Mus musculus GN=Clip2 PE=1 SV=2 - [CLIP2_MOUSE]	215.36	0.0831	1	3	6	7	1047	115.8	6.48
O35492	Dual specificity protein kinase CLK3 OS=Mus musculus GN=Clk3 PE=1 SV=2 - [CLK3_MOUSE]	43.63	0.0313	1	1	1	1	638	73.8	9.94
Q3UMW8	Ceroid-lipofuscinosis neuronal protein 5 homolog OS=Mus musculus GN=Cln5 PE=2 SV=1 - [CLN5_MOUSE]	26.4	0.0264	1	1	1	1	341	39.3	8.68
Q99LI9	Polyribonucleotide 5'-hydroxyl-kinase Clp1 OS=Mus musculus GN=Clp1 PE=2 SV=1 - [CLP1_MOUSE]	34.7	0.0259	1	1	1	1	425	47.7	6.62
O88696	Putative ATP-dependent Clp protease proteolytic subunit, mitochondrial OS=Mus musculus GN=Clpp PE=1 SV=1 - [CLPP_MOUSE]	150.06	0.261	1	5	5	14	272	29.8	7.47
Q9JHS4	ATP-dependent Clp protease ATP-binding subunit clpX-like, mitochondrial OS=Mus musculus GN=Clpx PE=1 SV=2 - [CLPX_MOUSE]	111.44	0.0789	1	4	4	5	634	69.2	7.71
Q06890	Clusterin OS=Mus musculus GN=Clu PE=1 SV=1 - [CLUS_MOUSE]	31.46	0.0268	1	1	1	2	448	51.6	5.67
Q8BH59	Calcium-binding mitochondrial carrier protein Aralar1 OS=Mus musculus GN=Slc25a12 PE=1 SV=1 - [CMC1_MOUSE]	376.71	0.2304	1	6	9	16	677	74.5	8.25
Q9QXX4	Calcium-binding mitochondrial carrier protein Aralar2 OS=Mus musculus GN=Slc25a13 PE=1 SV=1 - [CMC2_MOUSE]	365.93	0.2678	1	10	13	17	676	74.4	8.6
P0C8B4	Uncharacterized protein C14orf142 homolog OS=Mus musculus PE=2 SV=1 - [CN142_MOUSE]	54.36	0.2143	1	1	1	1	98	10.3	4.09
Q9CQE8	UPF0568 protein C14orf166 homolog OS=Mus musculus PE=2 SV=1 - [CN166_MOUSE]	308.82	0.4877	1	9	9	18	244	28.1	6.89
Q8K2Z4	Condensin complex subunit 1 OS=Mus musculus GN=Ncapd2 PE=1 SV=2 - [CND1_MOUSE]	335.91	0.1106	1	13	13	17	1392	155.6	6.38
Q8C156	Condensin complex subunit 2 OS=Mus musculus GN=Ncaph PE=2 SV=1 - [CND2_MOUSE]	105.53	0.093	1	5	5	7	731	82.3	4.96
Q6DFV1	Condensin-2 complex subunit G2 OS=Mus musculus GN=Ncapg2 PE=2 SV=2 - [CNDG2_MOUSE]	31.19	0.0079	1	1	1	1	1138	130.8	6.93
Q9D1A2	Cytosolic non-specific dipeptidase OS=Mus musculus GN=Cndp2 PE=1 SV=1 - [CNDP2_MOUSE]	424.04	0.3495	1	12	12	31	475	52.7	5.66
Q08093	Calponin-2 OS=Mus musculus GN=Cnn2 PE=2 SV=1 - [CNN2_MOUSE]	359.89	0.4393	1	9	10	44	305	33.1	7.62
Q9DAW9	Calponin-3 OS=Mus musculus GN=Cnn3 PE=1 SV=1 - [CNN3_MOUSE]	476.96	0.4485	1	11	12	43	330	36.4	5.72
Q6ZQ08	CCR4-NOT transcription complex subunit 1 OS=Mus musculus GN=Cnot1 PE=1 SV=2 - [CNOT1_MOUSE]	211.62	0.0282	1	5	5	11	2375	266.6	7.11
Q9D8X5	CCR4-NOT transcription complex subunit 8 OS=Mus musculus GN=Cnot8 PE=2 SV=1 - [CNOT8_MOUSE]	35.22	0.0377	1	1	1	1	292	33.6	4.81
Q8BH15	CCR4-NOT transcription complex subunit 10 OS=Mus musculus GN=Cnot10 PE=2 SV=1 - [CNO10_MOUSE]	38.88	0.0134	1	1	1	1	744	81.8	7.68
Q9QXT0	Protein canopy homolog 2 OS=Mus musculus GN=Cnpy2 PE=1 SV=1 - [CNPY2_MOUSE]	157.68	0.2088	1	3	3	10	182	20.8	5.07
Q9DAU1	Protein canopy homolog 3 OS=Mus musculus GN=Cnpy3 PE=1 SV=1 - [CNPY3_MOUSE]	42.88	0.0652	1	2	2	3	276	30.5	5.62
Q8BQ47	Protein canopy homolog 4 OS=Mus musculus GN=Cnpy4 PE=1 SV=1 - [CNPY4_MOUSE]	154.94	0.3143	1	5	5	7	245	28.1	4.77
P51642	Ciliary neurotrophic factor OS=Mus musculus GN=Cntf PE=2 SV=1 - [CNTF_MOUSE]	57.85	0.1162	1	2	2	3	198	22.6	6.52
Q9D0A3	Arpin OS=Mus musculus GN=Arpin PE=1 SV=1 - [ARPIN_MOUSE]	94.31	0.1991	1	4	4	5	226	25.2	5.19
P01027	Complement C3 OS=Mus musculus GN=C3 PE=1 SV=3 - [CO3_MOUSE]	43.17	0.0138	1	2	2	2	1663	186.4	6.73
P02463	Collagen alpha-1(IV) chain OS=Mus musculus GN=Col4a1 PE=2 SV=4 - [CO4A1_MOUSE]	83.21	0.0198	1	3	3	3	1669	160.6	8.24
Q9DBL7	Bifunctional coenzyme A synthase OS=Mus musculus GN=Coasy PE=1 SV=2 - [COASY_MOUSE]	131.02	0.1101	1	4	4	6	563	62	7.11
Q61245	Collagen alpha-1(XI) chain OS=Mus musculus GN=Col11a1 PE=1 SV=2 - [COBA1_MOUSE]	30.15	0.0067	2	1	1	1	1804	180.9	5.21
Q3UMF0	Cordon-bleu protein-like 1 OS=Mus musculus GN=Cobll1 PE=1 SV=2 - [COBL1_MOUSE]	54.02	0.0204	1	3	3	3	1273	137.3	8.16
P18760	Cofilin-1 OS=Mus musculus GN=Cfl1 PE=1 SV=3 - [COF1_MOUSE]	745.99	0.759	1	15	17	271	166	18.5	8.09
P45591	Cofilin-2 OS=Mus musculus GN=Cfl2 PE=1 SV=1 - [COF2_MOUSE]	364.28	0.5843	1	6	8	88	166	18.7	7.88
Q921L5	Conserved oligomeric Golgi complex subunit 2 OS=Mus musculus GN=Cog2 PE=2 SV=2 - [COG2_MOUSE]	110.1	0.0616	1	3	3	3	731	82	6.21
Q8R1U1	Conserved oligomeric Golgi complex subunit 4 OS=Mus musculus GN=Cog4 PE=2 SV=1 - [COG4_MOUSE]	66.74	0.042	1	2	2	3	785	88.6	5.15
P39061	Collagen alpha-1(XVIII) chain OS=Mus musculus GN=Col18a1 PE=1 SV=4 - [COIA1_MOUSE]	234.14	0.0581	1	7	7	14	1774	182.1	5.62
Q63829	COMM domain-containing protein 3 OS=Mus musculus GN=Commd3 PE=2 SV=1 - [COMD3_MOUSE]	82.02	0.1846	1	2	2	4	195	22	5.59
Q9CQ02	COMM domain-containing protein 4 OS=Mus musculus GN=Commd4 PE=2 SV=1 - [COMD4_MOUSE]	34.32	0.1005	1	1	1	1	199	21.8	6.67
Q3V4B5	COMM domain-containing protein 6 OS=Mus musculus GN=Commd6 PE=2 SV=1 - [COMD6_MOUSE]	48.29	0.1034	1	1	1	5	87	9.8	5.38
Q8K2Q0	COMM domain-containing protein 9 OS=Mus musculus GN=Commd9 PE=2 SV=3 - [COMD9_MOUSE]	67.29	0.2172	1	3	3	3	198	21.8	5.82
Q8JZY2	COMM domain-containing protein 10 OS=Mus musculus GN=Commd10 PE=2 SV=1 - [COMDA_MOUSE]	27.34	0.0693	1	1	1	1	202	22.8	6.65
Q8CIE6	Coatomer subunit alpha OS=Mus musculus GN=Copa PE=1 SV=2 - [COPA_MOUSE]	734.88	0.2239	1	23	23	36	1224	138.3	7.65
O55029	Coatomer subunit beta' OS=Mus musculus GN=Copb2 PE=2 SV=2 - [COPB2_MOUSE]	620.84	0.2331	1	20	20	38	905	102.4	5.3
Q9JIF7	Coatomer subunit beta OS=Mus musculus GN=Copb1 PE=1 SV=1 - [COPB_MOUSE]	870.62	0.3127	1	24	24	57	953	107	6
Q5XJY5	Coatomer subunit delta OS=Mus musculus GN=Arcn1 PE=2 SV=2 - [COPD_MOUSE]	316.2	0.2211	1	10	10	22	511	57.2	6.21
O89079	Coatomer subunit epsilon OS=Mus musculus GN=Cope PE=2 SV=3 - [COPE_MOUSE]	204.88	0.2532	1	6	6	9	308	34.5	5.06
Q9QZE5	Coatomer subunit gamma-1 OS=Mus musculus GN=Copg1 PE=2 SV=1 - [COPG1_MOUSE]	778.71	0.3009	1	17	18	41	874	97.5	5.35
Q9QXK3	Coatomer subunit gamma-2 OS=Mus musculus GN=Copg2 PE=2 SV=1 - [COPG2_MOUSE]	223.5	0.1389	1	6	7	14	871	97.6	5.8
Q9CQ13	Coordinator of PRMT5 and differentiation stimulator OS=Mus musculus GN=Coprs PE=1 SV=1 - [COPRS_MOUSE]	22.44	0.1156	1	1	1	1	173	18.7	4.08
Q8R1S0	Ubiquinone biosynthesis monooxygenase COQ6 OS=Mus musculus GN=Coq6 PE=2 SV=3 - [COQ6_MOUSE]	78.19	0.0945	1	3	4	4	476	51.4	7.17
Q8K1Z0	Ubiquinone biosynthesis protein COQ9, mitochondrial OS=Mus musculus GN=Coq9 PE=1 SV=1 - [COQ9_MOUSE]	127.84	0.1534	1	3	3	5	313	35.1	5.92
Q9WUM3	Coronin-1B OS=Mus musculus GN=Coro1b PE=1 SV=1 - [COR1B_MOUSE]	409.78	0.3347	1	14	14	23	484	53.9	5.78
Q9WUM4	Coronin-1C OS=Mus musculus GN=Coro1c PE=1 SV=2 - [COR1C_MOUSE]	478.41	0.3586	2	17	17	46	474	53.1	7.08
Q9D2V7	Coronin-7 OS=Mus musculus GN=Coro7 PE=2 SV=2 - [CORO7_MOUSE]	54.34	0.0315	1	2	2	2	922	100.7	5.77
P43135	COUP transcription factor 2 OS=Mus musculus GN=Nr2f2 PE=1 SV=2 - [COT2_MOUSE]	37.76	0.0338	2	1	1	1	414	45.5	8.28
Q9CQI6	Coactosin-like protein OS=Mus musculus GN=Cotl1 PE=1 SV=3 - [COTL1_MOUSE]	449.13	0.7958	1	13	13	54	142	15.9	5.4
Q8K0C8	Cytochrome c oxidase assembly protein COX19 OS=Mus musculus GN=Cox19 PE=3 SV=1 - [COX19_MOUSE]	27.53	0.1087	1	1	1	1	92	10.8	8.07
P00405	Cytochrome c oxidase subunit 2 OS=Mus musculus GN=Mtco2 PE=1 SV=1 - [COX2_MOUSE]	126.63	0.163	1	3	3	16	227	26	4.73
P19783	Cytochrome c oxidase subunit 4 isoform 1, mitochondrial OS=Mus musculus GN=Cox4i1 PE=1 SV=2 - [COX41_MOUSE]	177.53	0.3491	1	4	5	19	169	19.5	9.23
P12787	Cytochrome c oxidase subunit 5A, mitochondrial OS=Mus musculus GN=Cox5a PE=1 SV=2 - [COX5A_MOUSE]	221.39	0.5274	1	6	7	22	146	16.1	6.54
P19536	Cytochrome c oxidase subunit 5B, mitochondrial OS=Mus musculus GN=Cox5b PE=1 SV=1 - [COX5B_MOUSE]	117.74	0.25	1	4	4	12	128	13.8	8.38
Q9CPQ1	Cytochrome c oxidase subunit 6C OS=Mus musculus GN=Cox6c PE=1 SV=3 - [COX6C_MOUSE]	85.57	0.2105	1	3	3	9	76	8.5	10.14
Q9DCS2	UPF0585 protein C16orf13 homolog OS=Mus musculus PE=1 SV=1 - [CP013_MOUSE]	61.59	0.0882	1	1	1	2	204	22.7	6.52
Q8BTU1	UPF0468 protein C16orf80 homolog OS=Mus musculus GN=Gtl3 PE=2 SV=1 - [CP080_MOUSE]	26.35	0.0622	1	1	1	1	193	22.7	9.76
Q8K0C4	Lanosterol 14-alpha demethylase OS=Mus musculus GN=Cyp51a1 PE=2 SV=1 - [CP51A_MOUSE]	85.36	0.0656	1	4	4	4	503	56.7	8.41
Q8WTY4	Anamorsin OS=Mus musculus GN=Ciapin1 PE=1 SV=1 - [CPIN1_MOUSE]	184.78	0.288	1	6	6	11	309	33.4	5.2
Q8C166	Copine-1 OS=Mus musculus GN=Cpne1 PE=1 SV=1 - [CPNE1_MOUSE]	189.88	0.1269	1	5	6	13	536	58.8	5.66
P59108	Copine-2 OS=Mus musculus GN=Cpne2 PE=2 SV=1 - [CPNE2_MOUSE]	94.85	0.0438	7	1	2	4	548	61	5.96
Q8BT60	Copine-3 OS=Mus musculus GN=Cpne3 PE=2 SV=2 - [CPNE3_MOUSE]	275.15	0.1782	7	5	7	11	533	59.5	5.78
O88456	Calpain small subunit 1 OS=Mus musculus GN=Capns1 PE=2 SV=1 - [CPNS1_MOUSE]	270.9	0.3457	2	7	7	19	269	28.4	5.63
Q9EPU4	Cleavage and polyadenylation specificity factor subunit 1 OS=Mus musculus GN=Cpsf1 PE=1 SV=1 - [CPSF1_MOUSE]	81.67	0.0389	1	4	4	4	1441	160.7	6.39
O35218	Cleavage and polyadenylation specificity factor subunit 2 OS=Mus musculus GN=Cpsf2 PE=1 SV=1 - [CPSF2_MOUSE]	86.06	0.0614	1	3	3	3	782	88.3	5.11
Q9QXK7	Cleavage and polyadenylation specificity factor subunit 3 OS=Mus musculus GN=Cpsf3 PE=1 SV=2 - [CPSF3_MOUSE]	114.5	0.0526	1	3	3	4	684	77.5	5.6
Q9CQF3	Cleavage and polyadenylation specificity factor subunit 5 OS=Mus musculus GN=Nudt21 PE=2 SV=1 - [CPSF5_MOUSE]	253.01	0.4758	1	9	9	12	227	26.2	8.82
Q6NVF9	Cleavage and polyadenylation specificity factor subunit 6 OS=Mus musculus GN=Cpsf6 PE=2 SV=1 - [CPSF6_MOUSE]	266.44	0.1996	1	7	7	22	551	59.1	7.15
Q8BTV2	Cleavage and polyadenylation specificity factor subunit 7 OS=Mus musculus GN=Cpsf7 PE=1 SV=2 - [CPSF7_MOUSE]	101.23	0.0977	1	3	3	5	471	52	8
Q8C196	Carbamoyl-phosphate synthase [ammonia], mitochondrial OS=Mus musculus GN=Cps1 PE=1 SV=2 - [CPSM_MOUSE]	43.91	0.0107	1	2	2	3	1500	164.5	6.92
P52825	Carnitine O-palmitoyltransferase 2, mitochondrial OS=Mus musculus GN=Cpt2 PE=1 SV=2 - [CPT2_MOUSE]	81.65	0.0593	1	3	3	3	658	73.9	8.37
Q8BZR9	Uncharacterized protein C17orf85 homolog OS=Mus musculus PE=2 SV=1 - [CQ085_MOUSE]	50.32	0.0211	1	1	1	2	615	70	5.8
Q64735	Complement component receptor 1-like protein OS=Mus musculus GN=Cr1l PE=1 SV=1 - [CR1L_MOUSE]	36.46	0.0228	1	1	1	2	483	53.7	6.65
Q8C7D2	Protein cereblon OS=Mus musculus GN=Crbn PE=2 SV=1 - [CRBN_MOUSE]	31.76	0.0225	1	1	1	1	445	50.8	5.33
O88668	Protein CREG1 OS=Mus musculus GN=Creg1 PE=2 SV=1 - [CREG1_MOUSE]	26.54	0.05	1	1	1	1	220	24.4	6.42
Q91XD7	Cysteine-rich with EGF-like domain protein 1 OS=Mus musculus GN=Creld1 PE=2 SV=1 - [CREL1_MOUSE]	65	0.0786	1	2	2	3	420	45.7	5.02
Q9CYA0	Cysteine-rich with EGF-like domain protein 2 OS=Mus musculus GN=Creld2 PE=2 SV=1 - [CREL2_MOUSE]	70.95	0.0886	1	2	2	3	350	38.2	4.58
Q9DCT8	Cysteine-rich protein 2 OS=Mus musculus GN=Crip2 PE=1 SV=1 - [CRIP2_MOUSE]	168.46	0.3702	1	4	4	15	208	22.7	8.63
P47941	Crk-like protein OS=Mus musculus GN=Crkl PE=1 SV=2 - [CRKL_MOUSE]	184.66	0.2937	1	6	6	13	303	33.8	6.74
Q64010	Adapter molecule crk OS=Mus musculus GN=Crk PE=1 SV=1 - [CRK_MOUSE]	189.38	0.1645	1	4	4	12	304	33.8	5.55
Q9JM58	Cytokine receptor-like factor 1 OS=Mus musculus GN=Crlf1 PE=1 SV=1 - [CRLF1_MOUSE]	22.67	0.0259	1	1	1	2	425	46.6	8.94
Q80ZM8	Cardiolipin synthase OS=Mus musculus GN=Crls1 PE=2 SV=1 - [CRLS1_MOUSE]	27.69	0.066	1	1	1	1	303	32.5	9.86
P63154	Crooked neck-like protein 1 OS=Mus musculus GN=Crnkl1 PE=1 SV=1 - [CRNL1_MOUSE]	100.07	0.0696	1	4	4	4	690	83.4	6.93
Q9CYD3	Cartilage-associated protein OS=Mus musculus GN=Crtap PE=2 SV=3 - [CRTAP_MOUSE]	105.08	0.08	1	3	3	3	400	46.1	5.71
Q68ED7	CREB-regulated transcription coactivator 1 OS=Mus musculus GN=Crtc1 PE=2 SV=1 - [CRTC1_MOUSE]	25.6	0.0206	1	1	1	1	630	66.9	6.05
P23927	Alpha-crystallin B chain OS=Mus musculus GN=Cryab PE=1 SV=2 - [CRYAB_MOUSE]	275.34	0.4514	1	8	8	34	175	20.1	7.33
Q9CPT4	UPF0556 protein C19orf10 homolog OS=Mus musculus GN=D17Wsu104e PE=2 SV=1 - [CS010_MOUSE]	35.8	0.0542	1	1	1	2	166	18	6.79
Q9D7E4	UPF0449 protein C19orf25 homolog OS=Mus musculus PE=1 SV=1 - [CS025_MOUSE]	29.5	0.1468	1	1	1	3	109	12.1	5.25
Q9D735	Uncharacterized protein C19orf43 homolog OS=Mus musculus PE=2 SV=1 - [CS043_MOUSE]	79.7	0.2948	1	3	3	5	173	18.4	9.67
Q9DBE0	Cysteine sulfinic acid decarboxylase OS=Mus musculus GN=Csad PE=2 SV=1 - [CSAD_MOUSE]	33.19	0.0223	1	1	1	1	493	55.1	6.61
Q91W50	Cold shock domain-containing protein E1 OS=Mus musculus GN=Csde1 PE=2 SV=1 - [CSDE1_MOUSE]	635.94	0.2895	1	22	22	37	798	88.7	6.37
P07141	Macrophage colony-stimulating factor 1 OS=Mus musculus GN=Csf1 PE=1 SV=2 - [CSF1_MOUSE]	29.44	0.0254	1	1	1	1	552	60.6	5.24
Q60737	Casein kinase II subunit alpha OS=Mus musculus GN=Csnk2a1 PE=1 SV=2 - [CSK21_MOUSE]	156.34	0.1483	1	5	5	18	391	45.1	7.74
O54833	Casein kinase II subunit alpha' OS=Mus musculus GN=Csnk2a2 PE=2 SV=1 - [CSK22_MOUSE]	134.92	0.1771	1	4	4	7	350	41.2	8.56
P41241	Tyrosine-protein kinase CSK OS=Mus musculus GN=Csk PE=1 SV=2 - [CSK_MOUSE]	171.41	0.1289	1	5	5	6	450	50.7	7.06
Q99LD4	COP9 signalosome complex subunit 1 OS=Mus musculus GN=Gps1 PE=1 SV=1 - [CSN1_MOUSE]	136.62	0.1253	1	4	4	6	471	53.4	6.84
O88543	COP9 signalosome complex subunit 3 OS=Mus musculus GN=Cops3 PE=1 SV=3 - [CSN3_MOUSE]	281.96	0.2388	1	7	7	15	423	47.8	6.65
O88544	COP9 signalosome complex subunit 4 OS=Mus musculus GN=Cops4 PE=1 SV=1 - [CSN4_MOUSE]	339.56	0.2537	1	7	7	17	406	46.3	5.83
O35864	COP9 signalosome complex subunit 5 OS=Mus musculus GN=Cops5 PE=1 SV=3 - [CSN5_MOUSE]	143.69	0.1677	1	5	5	7	334	37.5	6.54
O88545	COP9 signalosome complex subunit 6 OS=Mus musculus GN=Cops6 PE=1 SV=1 - [CSN6_MOUSE]	106.57	0.0833	1	3	3	9	324	35.9	5.73
Q9CZ04	COP9 signalosome complex subunit 7a OS=Mus musculus GN=Cops7a PE=1 SV=2 - [CSN7A_MOUSE]	108.03	0.1709	1	4	4	4	275	30.2	7.87
Q8BV13	COP9 signalosome complex subunit 7b OS=Mus musculus GN=Cops7b PE=1 SV=1 - [CSN7B_MOUSE]	45.38	0.0833	1	1	1	2	264	29.7	6.32
Q8VBV7	COP9 signalosome complex subunit 8 OS=Mus musculus GN=Cops8 PE=1 SV=1 - [CSN8_MOUSE]	183.38	0.3493	1	5	5	11	209	23.2	5.2
P97315	Cysteine and glycine-rich protein 1 OS=Mus musculus GN=Csrp1 PE=1 SV=3 - [CSRP1_MOUSE]	342.72	0.5078	1	8	8	21	193	20.6	8.57
P97314	Cysteine and glycine-rich protein 2 OS=Mus musculus GN=Csrp2 PE=1 SV=3 - [CSRP2_MOUSE]	207.66	0.3109	1	5	5	10	193	20.9	8.62
Q8BIQ5	Cleavage stimulation factor subunit 2 OS=Mus musculus GN=Cstf2 PE=1 SV=2 - [CSTF2_MOUSE]	175.42	0.1431	1	2	4	6	580	61.3	6.83
Q99LI7	Cleavage stimulation factor subunit 3 OS=Mus musculus GN=Cstf3 PE=1 SV=1 - [CSTF3_MOUSE]	222.93	0.113	1	6	6	10	717	82.8	8.12
Q8C7E9	Cleavage stimulation factor subunit 2 tau variant OS=Mus musculus GN=Cstf2t PE=1 SV=2 - [CSTFT_MOUSE]	130.13	0.0839	1	1	3	4	632	65.8	7.25
Q9D1K7	UPF0687 protein C20orf27 homolog OS=Mus musculus PE=2 SV=3 - [CT027_MOUSE]	39.96	0.0805	1	1	1	3	174	19.5	6.68
Q6DIB4	Uncharacterized protein C20orf112 homolog OS=Mus musculus PE=2 SV=1 - [CT112_MOUSE]	46.15	0.0466	1	2	2	2	494	53.9	4.96
Q99LJ0	CTTNBP2 N-terminal-like protein OS=Mus musculus GN=Cttnbp2nl PE=1 SV=1 - [CT2NL_MOUSE]	224.67	0.105	1	5	5	8	638	69.8	7.71
Q9CWL8	Beta-catenin-like protein 1 OS=Mus musculus GN=Ctnnbl1 PE=2 SV=1 - [CTBL1_MOUSE]	135.62	0.0693	1	5	5	7	563	64.9	5.07
O88712	C-terminal-binding protein 1 OS=Mus musculus GN=Ctbp1 PE=1 SV=2 - [CTBP1_MOUSE]	95.46	0.1451	1	4	5	6	441	47.7	6.77
P56546	C-terminal-binding protein 2 OS=Mus musculus GN=Ctbp2 PE=1 SV=2 - [CTBP2_MOUSE]	75.8	0.0831	1	2	3	4	445	48.9	6.95
Q7TSG2	RNA polymerase II subunit A C-terminal domain phosphatase OS=Mus musculus GN=Ctdp1 PE=1 SV=1 - [CTDP1_MOUSE]	53.98	0.0281	1	2	2	3	960	104.5	5.39
Q6X893	Choline transporter-like protein 1 OS=Mus musculus GN=Slc44a1 PE=1 SV=3 - [CTL1_MOUSE]	20.19	0.0214	1	1	1	1	653	73	8.75
P26231	Catenin alpha-1 OS=Mus musculus GN=Ctnna1 PE=1 SV=1 - [CTNA1_MOUSE]	763.59	0.3377	1	20	24	38	906	100	6.23
Q61301	Catenin alpha-2 OS=Mus musculus GN=Ctnna2 PE=1 SV=3 - [CTNA2_MOUSE]	167.2	0.0776	1	1	5	9	953	105.2	5.71
Q02248	Catenin beta-1 OS=Mus musculus GN=Ctnnb1 PE=1 SV=1 - [CTNB1_MOUSE]	391.57	0.2612	1	10	13	22	781	85.4	5.86
P30999	Catenin delta-1 OS=Mus musculus GN=Ctnnd1 PE=1 SV=2 - [CTND1_MOUSE]	537.88	0.1834	1	15	15	37	938	104.9	6.87
Q09143	High affinity cationic amino acid transporter 1 OS=Mus musculus GN=Slc7a1 PE=1 SV=1 - [CTR1_MOUSE]	15.39	0.0161	1	1	1	2	622	67	7.06
Q9WTX6	Cullin-1 OS=Mus musculus GN=Cul1 PE=1 SV=1 - [CUL1_MOUSE]	101.16	0.0631	1	5	5	7	776	89.6	8
Q9D4H8	Cullin-2 OS=Mus musculus GN=Cul2 PE=1 SV=2 - [CUL2_MOUSE]	105.06	0.0711	1	4	4	4	745	86.8	7.01
Q3TCH7	Cullin-4A OS=Mus musculus GN=Cul4a PE=1 SV=1 - [CUL4A_MOUSE]	144.9	0.0738	1	2	5	11	759	87.7	8.35
A2A432	Cullin-4B OS=Mus musculus GN=Cul4b PE=1 SV=1 - [CUL4B_MOUSE]	178.81	0.067	1	3	6	10	970	110.6	8.37
Q9D5V5	Cullin-5 OS=Mus musculus GN=Cul5 PE=1 SV=3 - [CUL5_MOUSE]	95.77	0.059	1	4	4	5	780	90.9	7.81
Q9CQ89	Protein CutA OS=Mus musculus GN=Cuta PE=2 SV=3 - [CUTA_MOUSE]	104.55	0.2599	1	3	3	6	177	18.9	6.77
P53564	Homeobox protein cut-like 1 OS=Mus musculus GN=Cux1 PE=1 SV=3 - [CUX1_MOUSE]	69.42	0.035	2	4	4	4	1515	165.5	6.32
Q9JHS9	Spliceosome-associated protein CWC15 homolog OS=Mus musculus GN=Cwc15 PE=2 SV=1 - [CWC15_MOUSE]	45.83	0.0873	1	2	2	2	229	26.6	5.71
Q3TKY6	Peptidyl-prolyl cis-trans isomerase CWC27 homolog OS=Mus musculus GN=Cwc27 PE=2 SV=1 - [CWC27_MOUSE]	77.17	0.0746	1	2	2	3	469	53.5	5.53
Q9D0B6	Protein PBDC1 OS=Mus musculus GN=Pbdc1 PE=2 SV=1 - [PBDC1_MOUSE]	164.16	0.3687	1	6	6	9	198	22.2	4.55
P56391	Cytochrome c oxidase subunit 6B1 OS=Mus musculus GN=Cox6b1 PE=1 SV=2 - [CX6B1_MOUSE]	194.93	0.5349	1	5	5	20	86	10.1	8.72
P48771	Cytochrome c oxidase subunit 7A2, mitochondrial OS=Mus musculus GN=Cox7a2 PE=1 SV=2 - [CX7A2_MOUSE]	60.55	0.1205	1	1	1	2	83	9.3	10.27
P97792	Coxsackievirus and adenovirus receptor homolog OS=Mus musculus GN=Cxadr PE=1 SV=1 - [CXAR_MOUSE]	171.33	0.263	1	7	7	9	365	39.9	6.96
Q9D0M3	Cytochrome c1, heme protein, mitochondrial OS=Mus musculus GN=Cyc1 PE=1 SV=1 - [CY1_MOUSE]	75.23	0.0985	1	3	3	3	325	35.3	9.16
Q9CQX2	Cytochrome b5 type B OS=Mus musculus GN=Cyb5b PE=1 SV=1 - [CYB5B_MOUSE]	163.31	0.4041	1	3	3	13	146	16.3	4.89
P56395	Cytochrome b5 OS=Mus musculus GN=Cyb5a PE=1 SV=2 - [CYB5_MOUSE]	187.83	0.4776	1	5	5	9	134	15.2	5.07
Q9CXW3	Calcyclin-binding protein OS=Mus musculus GN=Cacybp PE=1 SV=1 - [CYBP_MOUSE]	146.39	0.4236	1	9	9	12	229	26.5	7.87
P00015	Cytochrome c, testis-specific OS=Mus musculus GN=Cyct PE=1 SV=3 - [CYC2_MOUSE]	72.34	0.2	1	1	2	3	105	11.7	9.51
P62897	Cytochrome c, somatic OS=Mus musculus GN=Cycs PE=1 SV=2 - [CYC_MOUSE]	345.61	0.5619	1	6	7	32	105	11.6	9.58
Q7TMB8	Cytoplasmic FMR1-interacting protein 1 OS=Mus musculus GN=Cyfip1 PE=1 SV=1 - [CYFP1_MOUSE]	389.82	0.1397	2	13	13	22	1253	145.1	6.9
Q80TQ2	Ubiquitin carboxyl-terminal hydrolase CYLD OS=Mus musculus GN=Cyld PE=1 SV=2 - [CYLD_MOUSE]	52.01	0.0263	1	2	2	2	952	106.5	5.63
P18406	Protein CYR61 OS=Mus musculus GN=Cyr61 PE=1 SV=1 - [CYR61_MOUSE]	302.61	0.2533	1	10	10	21	379	41.7	8.12
Q62426	Cystatin-B OS=Mus musculus GN=Cstb PE=1 SV=1 - [CYTB_MOUSE]	118.18	0.4184	1	3	3	11	98	11	7.39
Q2KN98	Cytospin-A OS=Mus musculus GN=Specc1l PE=1 SV=1 - [CYTSA_MOUSE]	20.5	0.0107	1	1	1	1	1118	124.4	5.76
Q5SXY1	Cytospin-B OS=Mus musculus GN=Specc1 PE=1 SV=2 - [CYTSB_MOUSE]	194.69	0.0665	1	6	6	9	1067	118	6.64
P98078	Disabled homolog 2 OS=Mus musculus GN=Dab2 PE=1 SV=2 - [DAB2_MOUSE]	183.58	0.1018	1	7	7	12	766	82.3	6.1
Q62165	Dystroglycan OS=Mus musculus GN=Dag1 PE=1 SV=4 - [DAG1_MOUSE]	28.23	0.0168	1	1	1	1	893	96.8	8.44
Q9JII5	DAZ-associated protein 1 OS=Mus musculus GN=Dazap1 PE=2 SV=2 - [DAZP1_MOUSE]	220.66	0.2069	1	6	6	14	406	43.2	8.56
Q62418	Drebrin-like protein OS=Mus musculus GN=Dbnl PE=1 SV=2 - [DBNL_MOUSE]	199.99	0.2546	1	8	8	10	436	48.7	4.92
Q9JKB3	Y-box-binding protein 3 OS=Mus musculus GN=Ybx3 PE=1 SV=2 - [YBOX3_MOUSE]	211.59	0.2022	2	3	6	18	361	38.8	9.69
O88487	Cytoplasmic dynein 1 intermediate chain 2 OS=Mus musculus GN=Dync1i2 PE=1 SV=1 - [DC1I2_MOUSE]	268.54	0.1863	1	7	7	12	612	68.4	5.29
Q8R1Q8	Cytoplasmic dynein 1 light intermediate chain 1 OS=Mus musculus GN=Dync1li1 PE=1 SV=1 - [DC1L1_MOUSE]	281.54	0.2581	1	9	9	14	523	56.6	6.42
Q6PDL0	Cytoplasmic dynein 1 light intermediate chain 2 OS=Mus musculus GN=Dync1li2 PE=1 SV=2 - [DC1L2_MOUSE]	107.43	0.0935	1	3	3	7	492	54.2	6.28
Q8K0T2	Cytoplasmic dynein 2 light intermediate chain 1 OS=Mus musculus GN=Dync2li1 PE=1 SV=1 - [DC2L1_MOUSE]	49.23	0.094	1	2	2	2	351	39.4	8.09
Q6PAC3	DDB1- and CUL4-associated factor 13 OS=Mus musculus GN=Dcaf13 PE=2 SV=2 - [DCA13_MOUSE]	42.42	0.036	1	1	1	2	445	51.4	9.32
Q8N7N5	DDB1- and CUL4-associated factor 8 OS=Mus musculus GN=Dcaf8 PE=1 SV=1 - [DCAF8_MOUSE]	35.87	0.0271	1	1	1	1	591	66	5.87
Q8BHC4	Dephospho-CoA kinase domain-containing protein OS=Mus musculus GN=Dcakd PE=2 SV=1 - [DCAKD_MOUSE]	89.67	0.1169	1	2	2	9	231	26.5	9.58
P43346	Deoxycytidine kinase OS=Mus musculus GN=Dck PE=1 SV=1 - [DCK_MOUSE]	68.14	0.0962	1	3	3	4	260	30.3	5.43
Q9JLM8	Serine/threonine-protein kinase DCLK1 OS=Mus musculus GN=Dclk1 PE=1 SV=1 - [DCLK1_MOUSE]	30.69	0.0397	1	2	2	2	756	84.1	8.87
Q9QZ73	DCN1-like protein 1 OS=Mus musculus GN=Dcun1d1 PE=2 SV=1 - [DCNL1_MOUSE]	110.2	0.1429	1	3	3	4	259	30.1	5.34
Q9DAR7	m7GpppX diphosphatase OS=Mus musculus GN=Dcps PE=1 SV=1 - [DCPS_MOUSE]	304.16	0.3432	1	9	9	18	338	39	6.48
O08788	Dynactin subunit 1 OS=Mus musculus GN=Dctn1 PE=1 SV=3 - [DCTN1_MOUSE]	680.55	0.2006	1	19	20	36	1281	141.6	5.9
Q99KJ8	Dynactin subunit 2 OS=Mus musculus GN=Dctn2 PE=1 SV=3 - [DCTN2_MOUSE]	465.93	0.3358	1	12	12	25	402	44.1	5.26
Q9Z0Y1	Dynactin subunit 3 OS=Mus musculus GN=Dctn3 PE=2 SV=2 - [DCTN3_MOUSE]	74.43	0.172	1	3	3	4	186	21	6.06
Q9QZB9	Dynactin subunit 5 OS=Mus musculus GN=Dctn5 PE=1 SV=1 - [DCTN5_MOUSE]	29.97	0.0385	1	1	1	2	182	20.1	8.02
Q9WUB4	Dynactin subunit 6 OS=Mus musculus GN=Dctn6 PE=1 SV=1 - [DCTN6_MOUSE]	47.97	0.0737	1	1	1	3	190	20.7	6.67
Q61655	ATP-dependent RNA helicase DDX19A OS=Mus musculus GN=Ddx19a PE=2 SV=2 - [DD19A_MOUSE]	277.72	0.2971	2	12	12	17	478	53.9	6.67
Q9CWS0	N(G),N(G)-dimethylarginine dimethylaminohydrolase 1 OS=Mus musculus GN=Ddah1 PE=1 SV=3 - [DDAH1_MOUSE]	329.25	0.5088	1	9	10	21	285	31.4	5.97
Q99LD8	N(G),N(G)-dimethylarginine dimethylaminohydrolase 2 OS=Mus musculus GN=Ddah2 PE=1 SV=1 - [DDAH2_MOUSE]	323.77	0.3789	1	6	7	17	285	29.6	6.01
Q3U1J4	DNA damage-binding protein 1 OS=Mus musculus GN=Ddb1 PE=1 SV=2 - [DDB1_MOUSE]	903.73	0.3228	1	32	32	70	1140	126.8	5.26
A2ADY9	Protein DDI1 homolog 2 OS=Mus musculus GN=Ddi2 PE=1 SV=1 - [DDI2_MOUSE]	115.81	0.1353	1	4	4	4	399	44.6	5.05
Q501J6	Probable ATP-dependent RNA helicase DDX17 OS=Mus musculus GN=Ddx17 PE=2 SV=1 - [DDX17_MOUSE]	759.8	0.3677	1	13	20	62	650	72.4	8.59
Q8K363	ATP-dependent RNA helicase DDX18 OS=Mus musculus GN=Ddx18 PE=2 SV=1 - [DDX18_MOUSE]	55.05	0.0667	1	3	3	3	660	74.1	9.52
Q91VR5	ATP-dependent RNA helicase DDX1 OS=Mus musculus GN=Ddx1 PE=1 SV=1 - [DDX1_MOUSE]	566.41	0.3297	1	18	18	35	740	82.4	7.21
Q9JJY4	Probable ATP-dependent RNA helicase DDX20 OS=Mus musculus GN=Ddx20 PE=1 SV=2 - [DDX20_MOUSE]	54.95	0.0545	1	2	2	2	825	91.7	6.74
Q9JIK5	Nucleolar RNA helicase 2 OS=Mus musculus GN=Ddx21 PE=1 SV=3 - [DDX21_MOUSE]	481.35	0.2315	1	15	15	28	851	93.5	9.11
Q9ESV0	ATP-dependent RNA helicase DDX24 OS=Mus musculus GN=Ddx24 PE=1 SV=2 - [DDX24_MOUSE]	80.09	0.0338	1	2	2	2	857	96.4	9.36
Q921N6	Probable ATP-dependent RNA helicase DDX27 OS=Mus musculus GN=Ddx27 PE=1 SV=3 - [DDX27_MOUSE]	146.17	0.1053	1	7	7	7	760	85.9	9.25
Q62167	ATP-dependent RNA helicase DDX3X OS=Mus musculus GN=Ddx3x PE=1 SV=3 - [DDX3X_MOUSE]	984.02	0.5363	4	29	30	82	662	73.1	7.18
Q810A7	ATP-dependent RNA helicase DDX42 OS=Mus musculus GN=Ddx42 PE=1 SV=3 - [DDX42_MOUSE]	237.93	0.084	1	7	7	8	929	101.9	6.98
Q569Z5	Probable ATP-dependent RNA helicase DDX46 OS=Mus musculus GN=Ddx46 PE=1 SV=2 - [DDX46_MOUSE]	473.35	0.1647	1	16	16	24	1032	117.4	9.26
Q9CWX9	Probable ATP-dependent RNA helicase DDX47 OS=Mus musculus GN=Ddx47 PE=2 SV=2 - [DDX47_MOUSE]	55.72	0.044	1	2	2	3	455	50.6	9.1
Q4FZF3	Probable ATP-dependent RNA helicase DDX49 OS=Mus musculus GN=Ddx49 PE=2 SV=1 - [DDX49_MOUSE]	37.7	0.0208	1	1	1	3	480	54.1	8.78
Q6P9R1	ATP-dependent RNA helicase DDX51 OS=Mus musculus GN=Ddx51 PE=2 SV=1 - [DDX51_MOUSE]	70.52	0.0485	1	2	2	3	639	70.3	9.47
Q9D0R4	Probable ATP-dependent RNA helicase DDX56 OS=Mus musculus GN=Ddx56 PE=2 SV=1 - [DDX56_MOUSE]	74.8	0.0366	1	1	2	2	546	61.2	9.17
Q6Q899	Probable ATP-dependent RNA helicase DDX58 OS=Mus musculus GN=Ddx58 PE=1 SV=2 - [DDX58_MOUSE]	32.2	0.0173	1	1	1	1	926	105.9	6.65
Q61656	Probable ATP-dependent RNA helicase DDX5 OS=Mus musculus GN=Ddx5 PE=1 SV=2 - [DDX5_MOUSE]	977.27	0.5	1	20	27	99	614	69.2	8.92
P54823	Probable ATP-dependent RNA helicase DDX6 OS=Mus musculus GN=Ddx6 PE=1 SV=1 - [DDX6_MOUSE]	489.27	0.4141	4	16	16	31	483	54.2	8.66
Q9CQ62	2,4-dienoyl-CoA reductase, mitochondrial OS=Mus musculus GN=Decr1 PE=1 SV=1 - [DECR_MOUSE]	103.91	0.1343	1	4	4	5	335	36.2	8.95
O09005	Sphingolipid delta(4)-desaturase DES1 OS=Mus musculus GN=Degs1 PE=2 SV=1 - [DEGS1_MOUSE]	32.64	0.0495	1	1	1	2	323	38.2	7.77
Q7TNV0	Protein DEK OS=Mus musculus GN=Dek PE=1 SV=1 - [DEK_MOUSE]	349.91	0.2211	1	10	10	22	380	43.1	6.86
Q9CQJ6	Density-regulated protein OS=Mus musculus GN=Denr PE=2 SV=1 - [DENR_MOUSE]	109.8	0.1919	1	3	3	8	198	22.2	5.3
Q91YP3	Putative deoxyribose-phosphate aldolase OS=Mus musculus GN=Dera PE=2 SV=1 - [DEOC_MOUSE]	51.45	0.0818	1	2	2	2	318	35	8.72
Q9R0P5	Destrin OS=Mus musculus GN=Dstn PE=1 SV=3 - [DEST_MOUSE]	526.4	0.6727	1	11	12	120	165	18.5	7.97
O70279	Protein DGCR14 OS=Mus musculus GN=Dgcr14 PE=2 SV=2 - [DGC14_MOUSE]	77.33	0.0772	1	2	2	2	479	52.6	6.7
Q8VC30	Bifunctional ATP-dependent dihydroxyacetone kinase/FAD-AMP lyase (cyclizing) OS=Mus musculus GN=Dak PE=2 SV=1 - [DHAK_MOUSE]	173.14	0.1228	1	6	6	7	578	59.7	6.92
O70503	Estradiol 17-beta-dehydrogenase 12 OS=Mus musculus GN=Hsd17b12 PE=2 SV=1 - [DHB12_MOUSE]	183.15	0.2372	1	6	6	12	312	34.7	9.52
P51660	Peroxisomal multifunctional enzyme type 2 OS=Mus musculus GN=Hsd17b4 PE=1 SV=3 - [DHB4_MOUSE]	276.43	0.1592	1	9	9	13	735	79.4	8.57
O88736	3-keto-steroid reductase OS=Mus musculus GN=Hsd17b7 PE=2 SV=1 - [DHB7_MOUSE]	14.29	0.0299	1	1	1	1	334	37.3	6.73
P50171	Estradiol 17-beta-dehydrogenase 8 OS=Mus musculus GN=Hsd17b8 PE=1 SV=2 - [DHB8_MOUSE]	73.84	0.1313	1	2	2	2	259	26.6	6.54
O88455	7-dehydrocholesterol reductase OS=Mus musculus GN=Dhcr7 PE=2 SV=1 - [DHCR7_MOUSE]	49.22	0.0361	1	2	2	2	471	53.9	8.35
P26443	Glutamate dehydrogenase 1, mitochondrial OS=Mus musculus GN=Glud1 PE=1 SV=1 - [DHE3_MOUSE]	789.12	0.4104	1	21	21	65	558	61.3	8
Q8BVI4	Dihydropteridine reductase OS=Mus musculus GN=Qdpr PE=1 SV=2 - [DHPR_MOUSE]	54.97	0.1286	1	2	2	3	241	25.6	7.81
Q8K2B3	Succinate dehydrogenase [ubiquinone] flavoprotein subunit, mitochondrial OS=Mus musculus GN=Sdha PE=1 SV=1 - [DHSA_MOUSE]	455.84	0.241	1	13	13	27	664	72.5	7.37
Q9CQA3	Succinate dehydrogenase [ubiquinone] iron-sulfur subunit, mitochondrial OS=Mus musculus GN=Sdhb PE=1 SV=1 - [DHSB_MOUSE]	34.91	0.0426	1	1	1	2	282	31.8	8.68
O35286	Putative pre-mRNA-splicing factor ATP-dependent RNA helicase DHX15 OS=Mus musculus GN=Dhx15 PE=2 SV=2 - [DHX15_MOUSE]	730.52	0.3497	1	23	23	57	795	90.9	7.46
Q99PU8	Putative ATP-dependent RNA helicase DHX30 OS=Mus musculus GN=Dhx30 PE=2 SV=1 - [DHX30_MOUSE]	67.01	0.0419	1	4	4	4	1217	136.6	8.75
O70133	ATP-dependent RNA helicase A OS=Mus musculus GN=Dhx9 PE=1 SV=2 - [DHX9_MOUSE]	1069.72	0.2594	1	28	28	71	1380	149.4	6.83
Q3TXU5	Deoxyhypusine synthase OS=Mus musculus GN=Dhps PE=2 SV=2 - [DHYS_MOUSE]	91.32	0.122	1	3	3	5	369	40.6	5.67
O08808	Protein diaphanous homolog 1 OS=Mus musculus GN=Diaph1 PE=1 SV=1 - [DIAP1_MOUSE]	115.79	0.0574	1	6	6	8	1255	139.3	5.57
Q9QZD8	Mitochondrial dicarboxylate carrier OS=Mus musculus GN=Slc25a10 PE=1 SV=2 - [DIC_MOUSE]	97.78	0.122	1	2	2	4	287	31.7	9.32
Q8C9B9	Death-inducer obliterator 1 OS=Mus musculus GN=Dido1 PE=1 SV=4 - [DIDO1_MOUSE]	53.34	0.0115	1	2	2	3	2256	247	7.91
Q99KV1	DnaJ homolog subfamily B member 11 OS=Mus musculus GN=Dnajb11 PE=1 SV=1 - [DJB11_MOUSE]	92.29	0.1341	1	3	3	3	358	40.5	6.32
Q9DC23	DnaJ homolog subfamily C member 10 OS=Mus musculus GN=Dnajc10 PE=1 SV=2 - [DJC10_MOUSE]	108.76	0.0593	1	4	4	7	793	90.5	6.96
Q5U458	DnaJ homolog subfamily C member 11 OS=Mus musculus GN=Dnajc11 PE=2 SV=2 - [DJC11_MOUSE]	59.28	0.059	1	2	2	2	559	63.2	8.32
Q9ESX5	H/ACA ribonucleoprotein complex subunit 4 OS=Mus musculus GN=Dkc1 PE=1 SV=4 - [DKC1_MOUSE]	86.6	0.1041	1	3	3	7	509	57.4	9.28
O08749	Dihydrolipoyl dehydrogenase, mitochondrial OS=Mus musculus GN=Dld PE=1 SV=2 - [DLDH_MOUSE]	210.08	0.1886	1	7	7	12	509	54.2	7.9
Q811D0	Disks large homolog 1 OS=Mus musculus GN=Dlg1 PE=1 SV=1 - [DLG1_MOUSE]	98.93	0.0751	1	3	3	8	905	100.1	5.8
P62627	Dynein light chain roadblock-type 1 OS=Mus musculus GN=Dynlrb1 PE=1 SV=3 - [DLRB1_MOUSE]	95.48	0.2917	1	2	2	3	96	11	7.25
Q9JI44	DNA methyltransferase 1-associated protein 1 OS=Mus musculus GN=Dmap1 PE=1 SV=1 - [DMAP1_MOUSE]	47.98	0.0342	1	1	1	1	468	53.1	9.5
P63037	DnaJ homolog subfamily A member 1 OS=Mus musculus GN=Dnaja1 PE=1 SV=1 - [DNJA1_MOUSE]	399.41	0.3703	4	11	12	31	397	44.8	7.08
Q9QYJ0	DnaJ homolog subfamily A member 2 OS=Mus musculus GN=Dnaja2 PE=1 SV=1 - [DNJA2_MOUSE]	333.88	0.301	1	10	10	31	412	45.7	6.48
Q99M87	DnaJ homolog subfamily A member 3, mitochondrial OS=Mus musculus GN=Dnaja3 PE=1 SV=1 - [DNJA3_MOUSE]	77.69	0.0917	1	3	3	3	480	52.4	9.22
Q9QYJ3	DnaJ homolog subfamily B member 1 OS=Mus musculus GN=Dnajb1 PE=2 SV=3 - [DNJB1_MOUSE]	246.06	0.2147	1	5	6	16	340	38.1	8.63
Q9D832	DnaJ homolog subfamily B member 4 OS=Mus musculus GN=Dnajb4 PE=2 SV=1 - [DNJB4_MOUSE]	322.72	0.4243	1	10	11	18	337	37.8	8.59
O54946	DnaJ homolog subfamily B member 6 OS=Mus musculus GN=Dnajb6 PE=1 SV=4 - [DNJB6_MOUSE]	82.23	0.0658	2	2	2	4	365	39.8	9.36
P54103	DnaJ homolog subfamily C member 2 OS=Mus musculus GN=Dnajc2 PE=1 SV=2 - [DNJC2_MOUSE]	42.27	0.0209	1	1	1	2	621	71.7	8.7
Q91YW3	DnaJ homolog subfamily C member 3 OS=Mus musculus GN=Dnajc3 PE=1 SV=1 - [DNJC3_MOUSE]	176.82	0.1488	1	6	6	10	504	57.4	5.85
P60904	DnaJ homolog subfamily C member 5 OS=Mus musculus GN=Dnajc5 PE=1 SV=1 - [DNJC5_MOUSE]	77.66	0.1263	1	1	1	2	198	22.1	5.07
Q9QYI3	DnaJ homolog subfamily C member 7 OS=Mus musculus GN=Dnajc7 PE=1 SV=2 - [DNJC7_MOUSE]	227.75	0.1538	1	8	8	18	494	56.4	6.49
Q6NZB0	DnaJ homolog subfamily C member 8 OS=Mus musculus GN=Dnajc8 PE=2 SV=2 - [DNJC8_MOUSE]	152.79	0.3202	1	6	6	14	253	29.8	9.06
Q91WN1	DnaJ homolog subfamily C member 9 OS=Mus musculus GN=Dnajc9 PE=2 SV=2 - [DNJC9_MOUSE]	21.58	0.0425	1	1	1	2	259	30	5.94
P37913	DNA ligase 1 OS=Mus musculus GN=Lig1 PE=1 SV=2 - [DNLI1_MOUSE]	161.64	0.0797	1	5	5	9	916	102.2	6.81
Q8K1M6	Dynamin-1-like protein OS=Mus musculus GN=Dnm1l PE=1 SV=2 - [DNM1L_MOUSE]	634.08	0.2156	1	12	12	26	742	82.6	7.05
O88508	DNA (cytosine-5)-methyltransferase 3A OS=Mus musculus GN=Dnmt3a PE=1 SV=2 - [DNM3A_MOUSE]	26.67	0.0198	1	1	1	1	908	101.6	6.65
P13864	DNA (cytosine-5)-methyltransferase 1 OS=Mus musculus GN=Dnmt1 PE=1 SV=5 - [DNMT1_MOUSE]	242.85	0.0667	1	9	9	11	1620	183.1	7.74
Q9Z2W0	Aspartyl aminopeptidase OS=Mus musculus GN=Dnpep PE=2 SV=2 - [DNPEP_MOUSE]	377.65	0.3298	1	12	12	23	473	52.2	7.25
A2AF47	Dedicator of cytokinesis protein 11 OS=Mus musculus GN=Dock11 PE=1 SV=1 - [DOC11_MOUSE]	24.21	0.0043	1	1	1	1	2073	237.6	7.78
Q8BUR4	Dedicator of cytokinesis protein 1 OS=Mus musculus GN=Dock1 PE=1 SV=3 - [DOCK1_MOUSE]	61.86	0.0118	1	2	2	2	1865	214.9	7.62
Q8R1A4	Dedicator of cytokinesis protein 7 OS=Mus musculus GN=Dock7 PE=1 SV=3 - [DOCK7_MOUSE]	290.92	0.0479	1	7	7	9	2130	241.3	6.71
Q99LN9	Deoxyhypusine hydroxylase OS=Mus musculus GN=Dohh PE=2 SV=2 - [DOHH_MOUSE]	200.04	0.2649	1	5	5	10	302	32.9	4.84
O35215	D-dopachrome decarboxylase OS=Mus musculus GN=Ddt PE=1 SV=3 - [DOPD_MOUSE]	171.82	0.661	1	6	6	8	118	13.1	6.54
Q9CR25	Diphthamide biosynthesis protein 2 OS=Mus musculus GN=Dph2 PE=1 SV=1 - [DPH2_MOUSE]	45.41	0.0389	1	1	1	1	489	52.3	5.53
O70152	Dolichol-phosphate mannosyltransferase OS=Mus musculus GN=Dpm1 PE=2 SV=1 - [DPM1_MOUSE]	57.48	0.1192	1	2	2	2	260	29.2	9.51
O35654	DNA polymerase delta subunit 2 OS=Mus musculus GN=Pold2 PE=2 SV=2 - [DPOD2_MOUSE]	41.71	0.064	1	2	2	3	469	51.3	5.78
Q9EQ28	DNA polymerase delta subunit 3 OS=Mus musculus GN=Pold3 PE=1 SV=2 - [DPOD3_MOUSE]	31.53	0.0541	1	2	2	2	462	50.8	9.32
Q9JKP7	DNA polymerase epsilon subunit 3 OS=Mus musculus GN=Pole3 PE=2 SV=1 - [DPOE3_MOUSE]	51.81	0.1241	1	1	1	1	145	16.6	4.74
Q9CQ36	DNA polymerase epsilon subunit 4 OS=Mus musculus GN=Pole4 PE=2 SV=1 - [DPOE4_MOUSE]	85.54	0.2966	1	2	2	2	118	12.2	4.92
Q8K409	DNA polymerase beta OS=Mus musculus GN=Polb PE=2 SV=3 - [DPOLB_MOUSE]	18.92	0.0448	1	1	1	1	335	38.3	8.85
Q9ET22	Dipeptidyl peptidase 2 OS=Mus musculus GN=Dpp7 PE=2 SV=2 - [DPP2_MOUSE]	20.16	0.0277	1	1	1	1	506	56.2	5.39
Q99KK7	Dipeptidyl peptidase 3 OS=Mus musculus GN=Dpp3 PE=2 SV=2 - [DPP3_MOUSE]	904.51	0.3794	1	19	19	55	738	82.8	5.38
Q99LT0	Protein dpy-30 homolog OS=Mus musculus GN=Dpy30 PE=1 SV=1 - [DPY30_MOUSE]	143.99	0.4747	1	4	4	20	99	11.2	4.88
O08553	Dihydropyrimidinase-related protein 2 OS=Mus musculus GN=Dpysl2 PE=1 SV=2 - [DPYL2_MOUSE]	825.47	0.4948	1	15	19	56	572	62.2	6.38
Q62188	Dihydropyrimidinase-related protein 3 OS=Mus musculus GN=Dpysl3 PE=1 SV=1 - [DPYL3_MOUSE]	589.85	0.4211	1	12	16	31	570	61.9	6.49
O35098	Dihydropyrimidinase-related protein 4 OS=Mus musculus GN=Dpysl4 PE=1 SV=1 - [DPYL4_MOUSE]	38.77	0.028	1	1	1	3	572	61.9	6.98
Q9QXS6	Drebrin OS=Mus musculus GN=Dbn1 PE=1 SV=4 - [DREB_MOUSE]	706.99	0.3414	1	19	19	46	706	77.2	4.49
P32233	Developmentally-regulated GTP-binding protein 1 OS=Mus musculus GN=Drg1 PE=1 SV=1 - [DRG1_MOUSE]	247.41	0.188	1	5	5	10	367	40.5	8.9
Q9QXB9	Developmentally-regulated GTP-binding protein 2 OS=Mus musculus GN=Drg2 PE=1 SV=1 - [DRG2_MOUSE]	147.94	0.1703	1	4	4	7	364	40.7	8.88
Q9CYC5	Kinetochore-associated protein DSN1 homolog OS=Mus musculus GN=Dsn1 PE=2 SV=1 - [DSN1_MOUSE]	45.17	0.0431	1	1	1	1	348	39.5	6.21
Q99MU3	Double-stranded RNA-specific adenosine deaminase OS=Mus musculus GN=Adar PE=1 SV=2 - [DSRAD_MOUSE]	53.45	0.0093	1	1	1	1	1178	130.4	8.7
Q9DD18	D-tyrosyl-tRNA(Tyr) deacylase 1 OS=Mus musculus GN=Dtd1 PE=1 SV=2 - [DTD1_MOUSE]	73.24	0.1483	1	2	2	2	209	23.4	7.87
Q3UIR3	E3 ubiquitin-protein ligase DTX3L OS=Mus musculus GN=Dtx3l PE=2 SV=1 - [DTX3L_MOUSE]	21.24	0.0214	1	1	1	1	748	83	8.09
Q91XI1	tRNA-dihydrouridine(47) synthase [NAD(P)(+)]-like OS=Mus musculus GN=Dus3l PE=2 SV=1 - [DUS3L_MOUSE]	49.11	0.0471	1	2	2	3	637	71	7.97
Q9D7X3	Dual specificity protein phosphatase 3 OS=Mus musculus GN=Dusp3 PE=1 SV=1 - [DUS3_MOUSE]	101.71	0.1351	1	2	2	3	185	20.5	6.54
Q60838	Segment polarity protein dishevelled homolog DVL-2 OS=Mus musculus GN=Dvl2 PE=1 SV=2 - [DVL2_MOUSE]	23.35	0.0204	1	1	1	1	736	78.8	5.96
Q8VDW0	ATP-dependent RNA helicase DDX39A OS=Mus musculus GN=Ddx39a PE=2 SV=1 - [DX39A_MOUSE]	485.29	0.3443	1	6	15	55	427	49	5.68
Q9Z1N5	Spliceosome RNA helicase Ddx39b OS=Mus musculus GN=Ddx39b PE=1 SV=1 - [DX39B_MOUSE]	568.74	0.4393	1	9	17	54	428	49	5.67
Q9JHU4	Cytoplasmic dynein 1 heavy chain 1 OS=Mus musculus GN=Dync1h1 PE=1 SV=2 - [DYHC1_MOUSE]	3162.07	0.259	2	94	94	171	4644	531.7	6.42
P51807	Dynein light chain Tctex-type 1 OS=Mus musculus GN=Dynlt1 PE=1 SV=1 - [DYLT1_MOUSE]	39.93	0.1593	1	1	1	1	113	12.5	5.08
P39054	Dynamin-2 OS=Mus musculus GN=Dnm2 PE=1 SV=2 - [DYN2_MOUSE]	193.06	0.0943	1	6	6	11	870	98.1	7.43
P00375	Dihydrofolate reductase OS=Mus musculus GN=Dhfr PE=1 SV=3 - [DYR_MOUSE]	244.74	0.5027	1	7	7	18	187	21.6	8.53
Q9ESD7	Dysferlin OS=Mus musculus GN=Dysf PE=1 SV=3 - [DYSF_MOUSE]	186.95	0.0411	1	4	6	6	2090	237.8	5.6
Q91ZU6	Dystonin OS=Mus musculus GN=Dst PE=1 SV=1 - [DYST_MOUSE]	25.54	0.0015	1	1	1	2	7389	833.1	5.31
Q9Z2H5	Band 4.1-like protein 1 OS=Mus musculus GN=Epb41l1 PE=1 SV=2 - [E41L1_MOUSE]	68.86	0.0307	1	2	2	2	879	98.3	5.62
Q9WV92	Band 4.1-like protein 3 OS=Mus musculus GN=Epb41l3 PE=1 SV=1 - [E41L3_MOUSE]	669.97	0.2487	1	19	19	39	929	103.3	5.31
Q8BGS1	Band 4.1-like protein 5 OS=Mus musculus GN=Epb41l5 PE=1 SV=1 - [E41L5_MOUSE]	64.73	0.0328	2	2	2	3	731	81.6	6.39
Q9D903	Probable rRNA-processing protein EBP2 OS=Mus musculus GN=Ebna1bp2 PE=2 SV=1 - [EBP2_MOUSE]	45.92	0.0915	1	3	3	4	306	34.7	10.08
O35459	Delta(3,5)-Delta(2,4)-dienoyl-CoA isomerase, mitochondrial OS=Mus musculus GN=Ech1 PE=1 SV=1 - [ECH1_MOUSE]	107.95	0.1651	1	4	4	5	327	36.1	7.71
Q8BMS1	Trifunctional enzyme subunit alpha, mitochondrial OS=Mus musculus GN=Hadha PE=1 SV=1 - [ECHA_MOUSE]	934.33	0.4089	2	23	23	56	763	82.6	9.14
Q99JY0	Trifunctional enzyme subunit beta, mitochondrial OS=Mus musculus GN=Hadhb PE=1 SV=1 - [ECHB_MOUSE]	433.13	0.3263	1	13	14	20	475	51.4	9.38
Q9D9V3	Ethylmalonyl-CoA decarboxylase OS=Mus musculus GN=Echdc1 PE=1 SV=2 - [ECHD1_MOUSE]	27.55	0.0311	1	1	1	1	322	35.4	7.01
Q3TLP5	Enoyl-CoA hydratase domain-containing protein 2, mitochondrial OS=Mus musculus GN=Echdc2 PE=1 SV=2 - [ECHD2_MOUSE]	83.65	0.1081	1	2	2	4	296	31.8	8.72
Q8BH95	Enoyl-CoA hydratase, mitochondrial OS=Mus musculus GN=Echs1 PE=1 SV=1 - [ECHM_MOUSE]	209.6	0.2483	1	6	6	19	290	31.5	8.48
Q9WUR2	Enoyl-CoA delta isomerase 2, mitochondrial OS=Mus musculus GN=Eci2 PE=1 SV=2 - [ECI2_MOUSE]	75.07	0.1304	1	4	4	4	391	43.2	8.92
Q6PDI5	Proteasome-associated protein ECM29 homolog OS=Mus musculus GN=Ecm29 PE=1 SV=3 - [ECM29_MOUSE]	239.69	0.0701	1	9	9	9	1840	203.6	7.06
Q3UJB9	Enhancer of mRNA-decapping protein 4 OS=Mus musculus GN=Edc4 PE=1 SV=2 - [EDC4_MOUSE]	650.52	0.1579	1	15	15	27	1406	152.4	5.78
Q8BL66	Early endosome antigen 1 OS=Mus musculus GN=Eea1 PE=1 SV=2 - [EEA1_MOUSE]	69.38	0.0354	1	4	4	5	1411	160.8	5.77
P10126	Elongation factor 1-alpha 1 OS=Mus musculus GN=Eef1a1 PE=1 SV=3 - [EF1A1_MOUSE]	1056.63	0.6407	2	28	28	508	462	50.1	9.01
O70251	Elongation factor 1-beta OS=Mus musculus GN=Eef1b PE=1 SV=5 - [EF1B_MOUSE]	421.58	0.64	1	10	11	66	225	24.7	4.69
P57776	Elongation factor 1-delta OS=Mus musculus GN=Eef1d PE=1 SV=3 - [EF1D_MOUSE]	473.58	0.4733	1	9	10	52	281	31.3	5.02
Q8K0D5	Elongation factor G, mitochondrial OS=Mus musculus GN=Gfm1 PE=2 SV=1 - [EFGM_MOUSE]	278.97	0.1491	1	10	10	16	751	83.5	6.92
Q9D8Y0	EF-hand domain-containing protein D2 OS=Mus musculus GN=Efhd2 PE=1 SV=1 - [EFHD2_MOUSE]	134.43	0.1875	2	5	5	10	240	26.8	5.06
P52795	Ephrin-B1 OS=Mus musculus GN=Efnb1 PE=1 SV=1 - [EFNB1_MOUSE]	37.62	0.0377	1	1	1	1	345	37.8	9.03
Q9CZR8	Elongation factor Ts, mitochondrial OS=Mus musculus GN=Tsfm PE=2 SV=1 - [EFTS_MOUSE]	66.66	0.0401	1	1	1	2	324	35.3	7.06
Q8BFR5	Elongation factor Tu, mitochondrial OS=Mus musculus GN=Tufm PE=1 SV=1 - [EFTU_MOUSE]	662	0.4712	2	20	21	51	452	49.5	7.56
Q01279	Epidermal growth factor receptor OS=Mus musculus GN=Egfr PE=1 SV=1 - [EGFR_MOUSE]	101.42	0.0421	3	5	5	6	1210	134.8	6.86
Q99MS7	EH domain-binding protein 1-like protein 1 OS=Mus musculus GN=Ehbp1l1 PE=1 SV=1 - [EH1L1_MOUSE]	136.77	0.039	1	4	4	4	1716	184.7	4.73
Q9WVK4	EH domain-containing protein 1 OS=Mus musculus GN=Ehd1 PE=1 SV=1 - [EHD1_MOUSE]	792.42	0.5618	1	21	24	48	534	60.6	6.83
Q8BH64	EH domain-containing protein 2 OS=Mus musculus GN=Ehd2 PE=1 SV=1 - [EHD2_MOUSE]	66.66	0.0718	1	3	4	5	543	61.1	6.51
Q9EQP2	EH domain-containing protein 4 OS=Mus musculus GN=Ehd4 PE=1 SV=1 - [EHD4_MOUSE]	320.57	0.1959	1	7	9	21	541	61.4	6.76
Q99LD9	Translation initiation factor eIF-2B subunit beta OS=Mus musculus GN=Eif2b2 PE=2 SV=1 - [EI2BB_MOUSE]	124.94	0.114	1	3	3	5	351	38.9	6.24
Q61749	Translation initiation factor eIF-2B subunit delta OS=Mus musculus GN=Eif2b4 PE=2 SV=2 - [EI2BD_MOUSE]	98.28	0.0916	1	3	3	3	524	57.6	9.25
Q8CHW4	Translation initiation factor eIF-2B subunit epsilon OS=Mus musculus GN=Eif2b5 PE=1 SV=1 - [EI2BE_MOUSE]	137.53	0.0725	2	5	5	7	717	80	5.07
P48024	Eukaryotic translation initiation factor 1 OS=Mus musculus GN=Eif1 PE=2 SV=2 - [EIF1_MOUSE]	182.21	0.4336	2	5	5	11	113	12.7	7.44
Q8BJW6	Eukaryotic translation initiation factor 2A OS=Mus musculus GN=Eif2a PE=2 SV=2 - [EIF2A_MOUSE]	283.04	0.2031	1	9	9	20	581	64.4	8.91
Q61211	Eukaryotic translation initiation factor 2D OS=Mus musculus GN=Eif2d PE=2 SV=3 - [EIF2D_MOUSE]	20.61	0.0193	1	1	1	1	570	62.8	8.24
P23116	Eukaryotic translation initiation factor 3 subunit A OS=Mus musculus GN=Eif3a PE=1 SV=5 - [EIF3A_MOUSE]	1349.2	0.2969	1	39	39	95	1344	161.8	6.77
Q8JZQ9	Eukaryotic translation initiation factor 3 subunit B OS=Mus musculus GN=Eif3b PE=1 SV=1 - [EIF3B_MOUSE]	801.76	0.335	1	21	21	46	803	91.3	5.02
Q8R1B4	Eukaryotic translation initiation factor 3 subunit C OS=Mus musculus GN=Eif3c PE=1 SV=1 - [EIF3C_MOUSE]	792.41	0.2854	1	23	23	62	911	105.5	5.78
O70194	Eukaryotic translation initiation factor 3 subunit D OS=Mus musculus GN=Eif3d PE=1 SV=2 - [EIF3D_MOUSE]	451.72	0.2245	1	9	9	20	548	63.9	6.05
Q9DCH4	Eukaryotic translation initiation factor 3 subunit F OS=Mus musculus GN=Eif3f PE=1 SV=2 - [EIF3F_MOUSE]	401.02	0.3186	1	9	9	32	361	38	5.58
Q9Z1D1	Eukaryotic translation initiation factor 3 subunit G OS=Mus musculus GN=Eif3g PE=1 SV=2 - [EIF3G_MOUSE]	279.57	0.3406	1	10	10	21	320	35.6	5.9
Q91WK2	Eukaryotic translation initiation factor 3 subunit H OS=Mus musculus GN=Eif3h PE=1 SV=1 - [EIF3H_MOUSE]	561.74	0.446	1	15	15	37	352	39.8	6.67
Q9QZD9	Eukaryotic translation initiation factor 3 subunit I OS=Mus musculus GN=Eif3i PE=1 SV=1 - [EIF3I_MOUSE]	323	0.3538	1	10	10	19	325	36.4	5.64
Q9DBZ5	Eukaryotic translation initiation factor 3 subunit K OS=Mus musculus GN=Eif3k PE=1 SV=1 - [EIF3K_MOUSE]	200.13	0.3807	1	6	6	15	218	25.1	4.93
Q8QZY1	Eukaryotic translation initiation factor 3 subunit L OS=Mus musculus GN=Eif3l PE=1 SV=1 - [EIF3L_MOUSE]	359.04	0.1631	1	9	9	23	564	66.6	6.44
Q99JX4	Eukaryotic translation initiation factor 3 subunit M OS=Mus musculus GN=Eif3m PE=2 SV=1 - [EIF3M_MOUSE]	202.21	0.1791	1	5	5	14	374	42.5	5.74
P70372	ELAV-like protein 1 OS=Mus musculus GN=Elavl1 PE=1 SV=2 - [ELAV1_MOUSE]	365.84	0.3742	1	10	10	28	326	36.1	9.04
Q8BHL5	Engulfment and cell motility protein 2 OS=Mus musculus GN=Elmo2 PE=1 SV=1 - [ELMO2_MOUSE]	104.82	0.0574	1	3	3	6	732	83.8	5.95
P62869	Transcription elongation factor B polypeptide 2 OS=Mus musculus GN=Tceb2 PE=1 SV=1 - [ELOB_MOUSE]	260.93	0.6017	1	8	8	24	118	13.2	5.01
Q7TT37	Elongator complex protein 1 OS=Mus musculus GN=Ikbkap PE=2 SV=2 - [ELP1_MOUSE]	92.56	0.0338	1	4	4	4	1333	149.5	6
Q91WG4	Elongator complex protein 2 OS=Mus musculus GN=Elp2 PE=1 SV=1 - [ELP2_MOUSE]	73.52	0.0445	1	2	2	2	831	93	5.82
Q9CZX0	Elongator complex protein 3 OS=Mus musculus GN=Elp3 PE=2 SV=1 - [ELP3_MOUSE]	81.32	0.0713	1	4	4	5	547	62.3	8.9
Q9ER73	Elongator complex protein 4 OS=Mus musculus GN=Elp4 PE=2 SV=2 - [ELP4_MOUSE]	137.72	0.0782	1	2	2	3	422	46.3	8.78
P70290	55 kDa erythrocyte membrane protein OS=Mus musculus GN=Mpp1 PE=1 SV=1 - [EM55_MOUSE]	67.76	0.0622	1	2	2	2	466	52.2	7.2
Q8VC03	Echinoderm microtubule-associated protein-like 3 OS=Mus musculus GN=Eml3 PE=1 SV=1 - [EMAL3_MOUSE]	38.41	0.029	1	2	2	2	897	95.6	7.05
P21995	Embigin OS=Mus musculus GN=Emb PE=1 SV=2 - [EMB_MOUSE]	46.81	0.0667	1	2	2	3	330	37	6.02
Q8C7X2	ER membrane protein complex subunit 1 OS=Mus musculus GN=Emc1 PE=1 SV=1 - [EMC1_MOUSE]	94.31	0.0371	1	3	3	4	997	111.5	7.43
Q9CRD2	ER membrane protein complex subunit 2 OS=Mus musculus GN=Emc2 PE=2 SV=1 - [EMC2_MOUSE]	80.09	0.1246	1	3	3	9	297	34.9	6.81
Q99KI3	ER membrane protein complex subunit 3 OS=Mus musculus GN=Emc3 PE=2 SV=3 - [EMC3_MOUSE]	23.58	0.0651	1	1	1	1	261	30	6.81
Q9CZX9	ER membrane protein complex subunit 4 OS=Mus musculus GN=Emc4 PE=2 SV=1 - [EMC4_MOUSE]	56.98	0.1202	1	2	2	3	183	20.1	8.62
O08579	Emerin OS=Mus musculus GN=Emd PE=1 SV=1 - [EMD_MOUSE]	33.86	0.1004	1	2	2	2	259	29.4	5.01
Q03173	Protein enabled homolog OS=Mus musculus GN=Enah PE=1 SV=2 - [ENAH_MOUSE]	35.13	0.0312	1	2	2	2	802	85.8	7.72
P17182	Alpha-enolase OS=Mus musculus GN=Eno1 PE=1 SV=3 - [ENOA_MOUSE]	1509.85	0.7005	1	23	28	499	434	47.1	6.8
P21550	Beta-enolase OS=Mus musculus GN=Eno3 PE=1 SV=3 - [ENOB_MOUSE]	697.12	0.5184	1	10	15	175	434	47	7.18
P17183	Gamma-enolase OS=Mus musculus GN=Eno2 PE=1 SV=2 - [ENOG_MOUSE]	376.83	0.2304	1	2	7	162	434	47.3	5.11
Q8BGB7	Enolase-phosphatase E1 OS=Mus musculus GN=Enoph1 PE=2 SV=1 - [ENOPH_MOUSE]	59.51	0.1323	1	2	2	2	257	28.6	4.92
P08113	Endoplasmin OS=Mus musculus GN=Hsp90b1 PE=1 SV=2 - [ENPL_MOUSE]	1108.28	0.4414	1	32	34	104	802	92.4	4.82
Q8BTJ4	Bis(5'-adenosyl)-triphosphatase enpp4 OS=Mus musculus GN=Enpp4 PE=1 SV=1 - [ENPP4_MOUSE]	41.87	0.0219	1	1	1	2	456	51.6	6.73
P60840	Alpha-endosulfine OS=Mus musculus GN=Ensa PE=1 SV=1 - [ENSA_MOUSE]	137.33	0.3306	1	3	4	10	121	13.3	7.24
Q9WUZ9	Ectonucleoside triphosphate diphosphohydrolase 5 OS=Mus musculus GN=Entpd5 PE=1 SV=1 - [ENTP5_MOUSE]	125.13	0.1194	1	3	3	5	427	47.1	5.29
P10404	MLV-related proviral Env polyprotein OS=Mus musculus PE=2 SV=3 - [ENV1_MOUSE]	220.99	0.0905	2	5	5	13	641	69.6	7.96
Q60902	Epidermal growth factor receptor substrate 15-like 1 OS=Mus musculus GN=Eps15l1 PE=1 SV=3 - [EP15R_MOUSE]	357.08	0.1786	1	11	11	18	907	99.2	5.02
Q99M71	Mammalian ependymin-related protein 1 OS=Mus musculus GN=Epdr1 PE=2 SV=1 - [EPDR1_MOUSE]	101.54	0.192	1	4	4	7	224	25.5	7.58
Q03145	Ephrin type-A receptor 2 OS=Mus musculus GN=Epha2 PE=1 SV=3 - [EPHA2_MOUSE]	108.46	0.0563	1	4	4	5	977	108.8	6.23
Q8VEH5	EPM2A-interacting protein 1 OS=Mus musculus GN=Epm2aip1 PE=2 SV=1 - [EPMIP_MOUSE]	38.83	0.0297	1	1	1	2	606	70.1	5.87
Q8CHU3	Epsin-2 OS=Mus musculus GN=Epn2 PE=1 SV=1 - [EPN2_MOUSE]	44.79	0.0168	2	1	1	1	595	63.4	8.16
Q99KN9	Clathrin interactor 1 OS=Mus musculus GN=Clint1 PE=1 SV=2 - [EPN4_MOUSE]	82.59	0.0571	1	3	3	4	631	68.5	6.25
P42567	Epidermal growth factor receptor substrate 15 OS=Mus musculus GN=Eps15 PE=1 SV=1 - [EPS15_MOUSE]	136.66	0.0424	1	3	3	5	897	98.4	4.6
Q9EQH2	Endoplasmic reticulum aminopeptidase 1 OS=Mus musculus GN=Erap1 PE=2 SV=2 - [ERAP1_MOUSE]	91.55	0.0591	1	4	4	5	930	106.5	6.2
P49135	TFIIH basal transcription factor complex helicase XPB subunit OS=Mus musculus GN=Ercc3 PE=2 SV=1 - [ERCC3_MOUSE]	47.02	0.0268	1	1	1	1	783	89.1	7.18
Q8R1L4	ER lumen protein retaining receptor 3 OS=Mus musculus GN=Kdelr3 PE=2 SV=1 - [ERD23_MOUSE]	50.33	0.0374	1	2	2	2	214	25.1	9.06
Q8R050	Eukaryotic peptide chain release factor GTP-binding subunit ERF3A OS=Mus musculus GN=Gspt1 PE=1 SV=2 - [ERF3A_MOUSE]	470.93	0.3318	2	17	17	26	636	68.6	5.21
Q8BLN5	Lanosterol synthase OS=Mus musculus GN=Lss PE=2 SV=2 - [ERG7_MOUSE]	95.37	0.0668	1	4	4	4	733	83.1	6.4
Q9DC16	Endoplasmic reticulum-Golgi intermediate compartment protein 1 OS=Mus musculus GN=Ergic1 PE=1 SV=1 - [ERGI1_MOUSE]	108.65	0.1724	1	4	4	10	290	32.5	7.06
Q91X78	Erlin-1 OS=Mus musculus GN=Erlin1 PE=1 SV=1 - [ERLN1_MOUSE]	180.21	0.1532	1	2	5	13	346	38.9	7.21
Q8BFZ9	Erlin-2 OS=Mus musculus GN=Erlin2 PE=1 SV=1 - [ERLN2_MOUSE]	344.8	0.2794	1	7	10	20	340	37.8	5.5
Q3UVK0	Endoplasmic reticulum metallopeptidase 1 OS=Mus musculus GN=Ermp1 PE=2 SV=2 - [ERMP1_MOUSE]	63.76	0.0601	1	3	3	3	898	100.1	7.49
Q8R180	ERO1-like protein alpha OS=Mus musculus GN=Ero1l PE=1 SV=2 - [ERO1A_MOUSE]	56.57	0.0496	1	2	2	3	464	54.1	6.54
P57759	Endoplasmic reticulum resident protein 29 OS=Mus musculus GN=Erp29 PE=1 SV=2 - [ERP29_MOUSE]	194.33	0.3053	1	6	6	18	262	28.8	6.15
Q9D1Q6	Endoplasmic reticulum resident protein 44 OS=Mus musculus GN=Erp44 PE=1 SV=1 - [ERP44_MOUSE]	224.08	0.2414	1	6	7	11	406	46.8	5.27
Q3V1V3	ESF1 homolog OS=Mus musculus GN=Esf1 PE=1 SV=1 - [ESF1_MOUSE]	129.26	0.0828	1	6	6	7	845	98	5.05
Q9R0P3	S-formylglutathione hydrolase OS=Mus musculus GN=Esd PE=2 SV=1 - [ESTD_MOUSE]	481.28	0.7163	1	12	12	57	282	31.3	7.12
Q3U7R1	Extended synaptotagmin-1 OS=Mus musculus GN=Esyt1 PE=2 SV=2 - [ESYT1_MOUSE]	764.03	0.2775	1	22	22	51	1092	121.5	5.95
Q3TZZ7	Extended synaptotagmin-2 OS=Mus musculus GN=Esyt2 PE=1 SV=1 - [ESYT2_MOUSE]	64.8	0.0485	1	3	3	3	845	94.1	7.75
Q99LC5	Electron transfer flavoprotein subunit alpha, mitochondrial OS=Mus musculus GN=Etfa PE=1 SV=2 - [ETFA_MOUSE]	495.01	0.6036	1	13	13	37	333	35	8.38
Q9DCW4	Electron transfer flavoprotein subunit beta OS=Mus musculus GN=Etfb PE=1 SV=3 - [ETFB_MOUSE]	396.46	0.4667	1	11	11	31	255	27.6	8.1
Q921G7	Electron transfer flavoprotein-ubiquinone oxidoreductase, mitochondrial OS=Mus musculus GN=Etfdh PE=1 SV=1 - [ETFD_MOUSE]	96.72	0.0714	1	3	3	5	616	68	7.58
Q9DCM0	Persulfide dioxygenase ETHE1, mitochondrial OS=Mus musculus GN=Ethe1 PE=1 SV=2 - [ETHE1_MOUSE]	166.28	0.2323	1	5	5	9	254	27.7	7.23
Q61545	RNA-binding protein EWS OS=Mus musculus GN=Ewsr1 PE=1 SV=2 - [EWS_MOUSE]	193.19	0.0962	1	5	5	12	655	68.4	9.33
Q9D4H1	Exocyst complex component 2 OS=Mus musculus GN=Exoc2 PE=1 SV=1 - [EXOC2_MOUSE]	76.48	0.0292	1	2	2	3	924	103.9	7.18
Q6KAR6	Exocyst complex component 3 OS=Mus musculus GN=Exoc3 PE=1 SV=2 - [EXOC3_MOUSE]	51.56	0.0278	1	2	2	2	755	86.4	6.2
O35382	Exocyst complex component 4 OS=Mus musculus GN=Exoc4 PE=1 SV=2 - [EXOC4_MOUSE]	123.66	0.0533	1	4	4	5	975	110.5	6.49
Q3TPX4	Exocyst complex component 5 OS=Mus musculus GN=Exoc5 PE=1 SV=2 - [EXOC5_MOUSE]	100.84	0.0579	1	3	3	3	708	81.7	6.71
Q6PGF7	Exocyst complex component 8 OS=Mus musculus GN=Exoc8 PE=1 SV=1 - [EXOC8_MOUSE]	60.34	0.0642	1	2	2	3	716	81	5.4
Q9DAA6	Exosome complex component CSL4 OS=Mus musculus GN=Exosc1 PE=2 SV=1 - [EXOS1_MOUSE]	15.23	0.0564	1	1	1	1	195	21.4	8.24
Q8VBV3	Exosome complex component RRP4 OS=Mus musculus GN=Exosc2 PE=2 SV=1 - [EXOS2_MOUSE]	86.76	0.1126	1	2	2	3	293	32.6	7.5
Q921I9	Exosome complex component RRP41 OS=Mus musculus GN=Exosc4 PE=2 SV=3 - [EXOS4_MOUSE]	162.81	0.2245	1	4	4	5	245	26.2	6.15
Q9CRA8	Exosome complex component RRP46 OS=Mus musculus GN=Exosc5 PE=1 SV=1 - [EXOS5_MOUSE]	103.57	0.2	1	3	3	3	235	25.2	7.56
Q8BTW3	Exosome complex component MTR3 OS=Mus musculus GN=Exosc6 PE=1 SV=1 - [EXOS6_MOUSE]	117.15	0.1538	1	3	3	4	273	28.4	6.11
Q9D753	Exosome complex component RRP43 OS=Mus musculus GN=Exosc8 PE=2 SV=1 - [EXOS8_MOUSE]	104.99	0.2101	1	4	4	6	276	29.9	5.2
Q9JHI7	Exosome complex component RRP45 OS=Mus musculus GN=Exosc9 PE=2 SV=1 - [EXOS9_MOUSE]	74.49	0.0799	1	3	3	4	438	48.9	5.11
P56960	Exosome component 10 OS=Mus musculus GN=Exosc10 PE=1 SV=2 - [EXOSX_MOUSE]	47.49	0.0135	1	1	1	2	887	100.9	8.29
P26040	Ezrin OS=Mus musculus GN=Ezr PE=1 SV=3 - [EZRI_MOUSE]	1037.69	0.5034	2	21	31	121	586	69.4	6.1
Q3UCV8	Ubiquitin thioesterase otulin OS=Mus musculus GN=Fam105b PE=1 SV=1 - [OTUL_MOUSE]	47.14	0.071	1	2	2	2	352	40.3	5.68
Q3TGF2	Protein FAM107B OS=Mus musculus GN=Fam107b PE=2 SV=2 - [F107B_MOUSE]	144.67	0.2443	1	3	3	4	131	15.6	8.31
Q99L47	Hsc70-interacting protein OS=Mus musculus GN=St13 PE=2 SV=1 - [F10A1_MOUSE]	474.84	0.3181	1	11	11	53	371	41.6	5.26
Q8VE88	Protein FAM114A2 OS=Mus musculus GN=Fam114a2 PE=2 SV=2 - [F1142_MOUSE]	229.91	0.1911	1	6	6	7	497	54	4.93
Q8BNE1	Protein FAM115A OS=Mus musculus GN=Fam115a PE=2 SV=1 - [F115A_MOUSE]	55.2	0.0184	1	1	1	1	924	102.7	6.96
Q921K8	Protein FAM115C OS=Mus musculus GN=Fam115c PE=2 SV=1 - [F115C_MOUSE]	42.53	0.0087	1	1	1	2	919	101.5	6.52
Q6A0A9	Constitutive coactivator of PPAR-gamma-like protein 1 OS=Mus musculus GN=FAM120A PE=1 SV=2 - [F120A_MOUSE]	269.79	0.0935	1	8	8	12	1112	121.6	8.92
Q9D6U8	Protein FAM162A OS=Mus musculus GN=Fam162a PE=2 SV=1 - [F162A_MOUSE]	38.91	0.1548	1	2	2	2	155	17.7	9.88
Q8CDM8	Protein FAM160B1 OS=Mus musculus GN=Fam160b1 PE=2 SV=2 - [F16B1_MOUSE]	46.07	0.0393	1	2	2	2	764	86	5.25
Q8BR63	Protein FAM177A1 OS=Mus musculus GN=Fam177a1 PE=2 SV=1 - [F177A_MOUSE]	87.51	0.0918	1	1	1	3	207	23.6	4.59
Q91WE2	Protein FAM192A OS=Mus musculus GN=Fam192a PE=2 SV=1 - [F192A_MOUSE]	118.19	0.1614	1	4	4	6	254	28.7	5.14
Q9CYH2	Redox-regulatory protein FAM213A OS=Mus musculus GN=Fam213a PE=1 SV=2 - [F213A_MOUSE]	30.45	0.0505	1	1	1	1	218	24.4	9.17
Q3UVG3	Protein FAM91A1 OS=Mus musculus GN=Fam91a1 PE=2 SV=1 - [F91A1_MOUSE]	24.14	0.0084	1	1	1	1	837	93.4	6.35
Q8C079	Striatin-interacting protein 1 OS=Mus musculus GN=Strip1 PE=1 SV=2 - [STRP1_MOUSE]	69.05	0.0538	1	3	3	3	837	95.5	6.25
Q8C152	Protein FAM46B OS=Mus musculus GN=Fam46b PE=2 SV=3 - [FA46B_MOUSE]	12.93	0.0141	1	1	1	1	427	47	7.78
Q921M7	Protein FAM49B OS=Mus musculus GN=Fam49b PE=2 SV=1 - [FA49B_MOUSE]	86.08	0.0741	1	2	2	3	324	36.8	6.06
O88783	Coagulation factor V OS=Mus musculus GN=F5 PE=1 SV=1 - [FA5_MOUSE]	102.64	0.0188	1	4	4	4	2183	247.1	6.05
Q922G2	Protein FAM76A OS=Mus musculus GN=Fam76a PE=2 SV=1 - [FA76A_MOUSE]	37.76	0.0228	1	1	1	1	307	35.1	9.19
Q148V8	Protein FAM83H OS=Mus musculus GN=Fam83h PE=1 SV=1 - [FA83H_MOUSE]	71.96	0.0273	1	2	2	2	1209	131	7.24
Q9DCL2	MIP18 family protein FAM96A OS=Mus musculus GN=Fam96a PE=2 SV=1 - [FA96A_MOUSE]	57.09	0.0688	1	1	1	2	160	18.4	4.82
Q3TJZ6	Protein FAM98A OS=Mus musculus GN=Fam98a PE=2 SV=1 - [FA98A_MOUSE]	131.58	0.0932	1	3	4	6	515	55	8.95
Q80VD1	Protein FAM98B OS=Mus musculus GN=Fam98b PE=2 SV=1 - [FA98B_MOUSE]	191.44	0.2308	1	6	7	11	429	45.3	8.5
P35505	Fumarylacetoacetase OS=Mus musculus GN=Fah PE=1 SV=2 - [FAAA_MOUSE]	353.44	0.2721	1	9	9	22	419	46.1	7.18
Q8R3F5	Malonyl-CoA-acyl carrier protein transacylase, mitochondrial OS=Mus musculus GN=Mcat PE=2 SV=3 - [FABD_MOUSE]	75.07	0.0971	1	2	2	4	381	41.9	8.1
Q05816	Fatty acid-binding protein, epidermal OS=Mus musculus GN=Fabp5 PE=1 SV=3 - [FABP5_MOUSE]	266.07	0.4667	1	6	6	21	135	15.1	6.54
Q80W54	CAAX prenyl protease 1 homolog OS=Mus musculus GN=Zmpste24 PE=1 SV=2 - [FACE1_MOUSE]	46.42	0.0232	1	1	1	2	475	54.7	6.95
Q922J9	Fatty acyl-CoA reductase 1 OS=Mus musculus GN=Far1 PE=1 SV=1 - [FACR1_MOUSE]	104.93	0.0816	1	4	4	5	515	59.4	9.19
Q61160	Protein FADD OS=Mus musculus GN=Fadd PE=1 SV=1 - [FADD_MOUSE]	23.47	0.0829	1	1	1	1	205	22.9	6.04
Q920L1	Fatty acid desaturase 1 OS=Mus musculus GN=Fads1 PE=2 SV=1 - [FADS1_MOUSE]	20.17	0.0224	1	1	1	1	447	52.3	9.29
Q9Z0R9	Fatty acid desaturase 2 OS=Mus musculus GN=Fads2 PE=2 SV=1 - [FADS2_MOUSE]	53.08	0.0428	1	2	2	2	444	52.4	8.82
Q9JJE7	Fatty acid desaturase 3 OS=Mus musculus GN=Fads3 PE=2 SV=2 - [FADS3_MOUSE]	27.65	0.0312	1	1	1	2	449	51.4	7.49
P54731	FAS-associated factor 1 OS=Mus musculus GN=Faf1 PE=2 SV=2 - [FAF1_MOUSE]	45.32	0.0385	1	2	2	2	649	73.8	4.86
Q3TDN2	FAS-associated factor 2 OS=Mus musculus GN=Faf2 PE=2 SV=2 - [FAF2_MOUSE]	134.66	0.1213	1	4	4	9	445	52.4	5.47
P34152	Focal adhesion kinase 1 OS=Mus musculus GN=Ptk2 PE=1 SV=3 - [FAK1_MOUSE]	97.58	0.0284	2	3	3	6	1090	123.5	6.68
Q7TMV3	FAST kinase domain-containing protein 5 OS=Mus musculus GN=Fastkd5 PE=2 SV=1 - [FAKD5_MOUSE]	20.48	0.0184	1	1	1	1	762	86.5	8.38
Q91VU0	Protein FAM3C OS=Mus musculus GN=Fam3c PE=1 SV=1 - [FAM3C_MOUSE]	203.77	0.2907	1	5	5	5	227	24.7	8.29
P19096	Fatty acid synthase OS=Mus musculus GN=Fasn PE=1 SV=2 - [FAS_MOUSE]	2812.18	0.4625	1	85	85	223	2504	272.3	6.58
Q71FD7	Filamin-binding LIM protein 1 OS=Mus musculus GN=Fblim1 PE=1 SV=2 - [FBLI1_MOUSE]	235.04	0.1707	1	5	5	11	375	41	6.51
Q8K012	Formin-binding protein 1-like OS=Mus musculus GN=Fnbp1l PE=1 SV=2 - [FBP1L_MOUSE]	71.25	0.0661	1	3	3	5	605	69.8	6.64
P35550	rRNA 2'-O-methyltransferase fibrillarin OS=Mus musculus GN=Fbl PE=2 SV=2 - [FBRL_MOUSE]	348.06	0.37	2	9	9	21	327	34.3	10.24
Q8VDH1	F-box only protein 21 OS=Mus musculus GN=Fbxo21 PE=2 SV=1 - [FBX21_MOUSE]	25.51	0.0287	1	1	1	1	627	72.1	6.06
Q78JE5	F-box only protein 22 OS=Mus musculus GN=Fbxo22 PE=2 SV=2 - [FBX22_MOUSE]	128.18	0.1244	1	5	5	6	402	44.2	7.61
Q8BJL1	F-box only protein 30 OS=Mus musculus GN=Fbxo30 PE=2 SV=2 - [FBX30_MOUSE]	42.71	0.0241	1	1	1	1	746	82.6	5.26
Q8BMI0	F-box only protein 38 OS=Mus musculus GN=Fbxo38 PE=1 SV=1 - [FBX38_MOUSE]	25.07	0.0142	1	1	1	1	1194	133.8	6.09
Q3UQN2	FCH domain only protein 2 OS=Mus musculus GN=Fcho2 PE=1 SV=1 - [FCHO2_MOUSE]	66.63	0.0408	1	2	2	2	809	88.7	6.89
P23591	GDP-L-fucose synthase OS=Mus musculus GN=Tsta3 PE=2 SV=3 - [FCL_MOUSE]	109.41	0.1963	1	4	4	6	321	35.9	6.74
P39749	Flap endonuclease 1 OS=Mus musculus GN=Fen1 PE=1 SV=1 - [FEN1_MOUSE]	200.08	0.2249	1	7	7	16	378	42.3	8.34
Q8CIB5	Fermitin family homolog 2 OS=Mus musculus GN=Fermt2 PE=1 SV=1 - [FERM2_MOUSE]	207.85	0.125	1	6	6	10	680	77.8	6.7
Q3UVL4	Vacuolar protein sorting-associated protein 51 homolog OS=Mus musculus GN=Vps51 PE=2 SV=2 - [VPS51_MOUSE]	27.37	0.0179	1	1	1	1	782	86.1	6.24
Q69ZL1	FYVE, RhoGEF and PH domain-containing protein 6 OS=Mus musculus GN=Fgd6 PE=1 SV=2 - [FGD6_MOUSE]	32.1	0.0064	1	1	1	2	1399	155.1	7.87
P97447	Four and a half LIM domains protein 1 OS=Mus musculus GN=Fhl1 PE=2 SV=3 - [FHL1_MOUSE]	322.44	0.4429	1	10	10	21	280	31.9	8.37
O70433	Four and a half LIM domains protein 2 OS=Mus musculus GN=Fhl2 PE=1 SV=1 - [FHL2_MOUSE]	82.66	0.129	1	3	3	5	279	32.1	7.3
Q6P9Q4	FH1/FH2 domain-containing protein 1 OS=Mus musculus GN=Fhod1 PE=1 SV=3 - [FHOD1_MOUSE]	274.6	0.0952	1	7	7	11	1197	129.5	6.28
Q76LL6	FH1/FH2 domain-containing protein 3 OS=Mus musculus GN=Fhod3 PE=1 SV=1 - [FHOD3_MOUSE]	16.01	0.0089	1	1	1	1	1578	175.5	5.55
Q6P6L0	Filamin A-interacting protein 1-like OS=Mus musculus GN=Filip1l PE=1 SV=2 - [FIL1L_MOUSE]	37.72	0.0141	1	1	1	1	1131	129.7	6.37
Q9D824	Pre-mRNA 3'-end-processing factor FIP1 OS=Mus musculus GN=Fip1l1 PE=1 SV=1 - [FIP1_MOUSE]	208.81	0.1033	1	4	4	9	581	64.9	5.77
Q9CQ92	Mitochondrial fission 1 protein OS=Mus musculus GN=Fis1 PE=1 SV=1 - [FIS1_MOUSE]	158.01	0.2434	1	4	4	14	152	17	8.53
Q6P9Q6	FK506-binding protein 15 OS=Mus musculus GN=Fkbp15 PE=1 SV=2 - [FKB15_MOUSE]	87.32	0.0452	1	3	3	3	1216	132.9	5.07
P26883	Peptidyl-prolyl cis-trans isomerase FKBP1A OS=Mus musculus GN=Fkbp1a PE=1 SV=2 - [FKB1A_MOUSE]	140.1	0.4074	1	3	3	24	108	11.9	8.16
P45878	Peptidyl-prolyl cis-trans isomerase FKBP2 OS=Mus musculus GN=Fkbp2 PE=1 SV=1 - [FKBP2_MOUSE]	135.5	0.4857	1	5	5	14	140	15.3	8.88
Q62446	Peptidyl-prolyl cis-trans isomerase FKBP3 OS=Mus musculus GN=Fkbp3 PE=1 SV=2 - [FKBP3_MOUSE]	150.17	0.2411	1	6	6	9	224	25.1	9.28
P30416	Peptidyl-prolyl cis-trans isomerase FKBP4 OS=Mus musculus GN=Fkbp4 PE=1 SV=5 - [FKBP4_MOUSE]	660.46	0.4782	1	17	17	68	458	51.5	5.72
O54998	Peptidyl-prolyl cis-trans isomerase FKBP7 OS=Mus musculus GN=Fkbp7 PE=1 SV=1 - [FKBP7_MOUSE]	30.93	0.0505	1	1	1	1	218	24.9	6.04
O35465	Peptidyl-prolyl cis-trans isomerase FKBP8 OS=Mus musculus GN=Fkbp8 PE=1 SV=2 - [FKBP8_MOUSE]	125.71	0.1368	1	4	4	6	402	43.5	5.16
Q9Z247	Peptidyl-prolyl cis-trans isomerase FKBP9 OS=Mus musculus GN=Fkbp9 PE=1 SV=1 - [FKBP9_MOUSE]	173.19	0.1333	1	7	7	12	570	63	5.21
Q9ER69	Pre-mRNA-splicing regulator WTAP OS=Mus musculus GN=Wtap PE=2 SV=3 - [FL2D_MOUSE]	76.45	0.0682	1	2	2	2	396	44.1	5.25
Q9JJ28	Protein flightless-1 homolog OS=Mus musculus GN=Flii PE=1 SV=1 - [FLII_MOUSE]	271.55	0.0952	1	9	9	12	1271	144.7	6.06
Q8BTM8	Filamin-A OS=Mus musculus GN=Flna PE=1 SV=5 - [FLNA_MOUSE]	4738.84	0.5538	1	98	107	464	2647	281	6.04
Q80X90	Filamin-B OS=Mus musculus GN=Flnb PE=1 SV=3 - [FLNB_MOUSE]	3613.97	0.4712	1	80	89	289	2602	277.7	5.71
Q8VHX6	Filamin-C OS=Mus musculus GN=Flnc PE=1 SV=3 - [FLNC_MOUSE]	3613.58	0.4296	2	76	90	276	2726	290.9	5.95
O08917	Flotillin-1 OS=Mus musculus GN=Flot1 PE=1 SV=1 - [FLOT1_MOUSE]	179.41	0.1636	1	5	5	5	428	47.5	7.15
Q60634	Flotillin-2 OS=Mus musculus GN=Flot2 PE=1 SV=2 - [FLOT2_MOUSE]	358.03	0.3435	1	11	11	16	428	47	5.2
Q6ZPF4	Formin-like protein 3 OS=Mus musculus GN=Fmnl3 PE=1 SV=2 - [FMNL3_MOUSE]	114.75	0.0691	2	6	6	8	1028	117.1	6.67
P35922	Fragile X mental retardation protein 1 homolog OS=Mus musculus GN=Fmr1 PE=1 SV=1 - [FMR1_MOUSE]	267.52	0.1205	2	5	7	14	614	68.9	7.62
Q80TY0	Formin-binding protein 1 OS=Mus musculus GN=Fnbp1 PE=1 SV=2 - [FNBP1_MOUSE]	17.11	0.013	1	1	1	1	616	71.3	5.67
Q61239	Protein farnesyltransferase/geranylgeranyltransferase type-1 subunit alpha OS=Mus musculus GN=Fnta PE=1 SV=1 - [FNTA_MOUSE]	99.46	0.1034	1	3	3	3	377	44	4.93
Q8K2I1	Protein farnesyltransferase subunit beta OS=Mus musculus GN=Fntb PE=1 SV=1 - [FNTB_MOUSE]	53.53	0.0801	1	2	2	3	437	48.8	5.8
Q9CY57	Chromatin target of PRMT1 protein OS=Mus musculus GN=Chtop PE=1 SV=2 - [CHTOP_MOUSE]	60.03	0.0522	1	1	1	1	249	26.6	12.23
Q61572	Forkhead box protein C1 OS=Mus musculus GN=Foxc1 PE=2 SV=3 - [FOXC1_MOUSE]	35.47	0.0416	1	1	1	1	553	56.9	8.51
Q920E5	Farnesyl pyrophosphate synthase OS=Mus musculus GN=Fdps PE=1 SV=1 - [FPPS_MOUSE]	428.55	0.3739	1	12	12	52	353	40.6	5.66
Q9WV91	Prostaglandin F2 receptor negative regulator OS=Mus musculus GN=Ptgfrn PE=1 SV=2 - [FPRP_MOUSE]	81.35	0.0535	1	3	3	5	879	98.7	6.61
O35943	Frataxin, mitochondrial OS=Mus musculus GN=Fxn PE=1 SV=1 - [FRDA_MOUSE]	77.37	0.1159	1	2	2	3	207	22.9	8.02
P97376	Protein FRG1 OS=Mus musculus GN=Frg1 PE=1 SV=2 - [FRG1_MOUSE]	31.1	0.062	1	1	1	1	258	29.1	8.92
Q61553	Fascin OS=Mus musculus GN=Fscn1 PE=1 SV=4 - [FSCN1_MOUSE]	1109.93	0.6836	1	26	26	127	493	54.5	6.89
Q62356	Follistatin-related protein 1 OS=Mus musculus GN=Fstl1 PE=1 SV=2 - [FSTL1_MOUSE]	51.81	0.0588	1	2	2	3	306	34.5	5.85
Q8BGW1	Alpha-ketoglutarate-dependent dioxygenase FTO OS=Mus musculus GN=Fto PE=1 SV=1 - [FTO_MOUSE]	94.87	0.0757	1	3	3	4	502	58	5.12
Q91WJ8	Far upstream element-binding protein 1 OS=Mus musculus GN=Fubp1 PE=1 SV=1 - [FUBP1_MOUSE]	400.62	0.2335	1	12	16	34	651	68.5	7.93
Q3U0V1	Far upstream element-binding protein 2 OS=Mus musculus GN=Khsrp PE=1 SV=2 - [FUBP2_MOUSE]	978.06	0.389	1	24	28	81	748	76.7	7.33
Q99LJ1	Tissue alpha-L-fucosidase OS=Mus musculus GN=Fuca1 PE=2 SV=1 - [FUCO_MOUSE]	57.97	0.0863	1	3	3	3	452	52.2	6.95
P97807	Fumarate hydratase, mitochondrial OS=Mus musculus GN=Fh PE=1 SV=3 - [FUMH_MOUSE]	415.96	0.3452	1	12	12	23	507	54.3	9.04
Q9D6K8	FUN14 domain-containing protein 2 OS=Mus musculus GN=Fundc2 PE=2 SV=1 - [FUND2_MOUSE]	43.95	0.1589	1	2	2	2	151	16.6	9.7
P56959	RNA-binding protein FUS OS=Mus musculus GN=Fus PE=2 SV=1 - [FUS_MOUSE]	301.45	0.1351	1	8	8	38	518	52.6	9.36
Q61584	Fragile X mental retardation syndrome-related protein 1 OS=Mus musculus GN=Fxr1 PE=1 SV=2 - [FXR1_MOUSE]	681.42	0.2969	1	14	15	41	677	76.2	6.98
Q9WVR4	Fragile X mental retardation syndrome-related protein 2 OS=Mus musculus GN=Fxr2 PE=1 SV=1 - [FXR2_MOUSE]	94.39	0.0684	1	3	4	5	673	73.7	6.23
Q8VDC1	FYVE and coiled-coil domain-containing protein 1 OS=Mus musculus GN=Fyco1 PE=1 SV=1 - [FYCO1_MOUSE]	27.01	0.007	1	1	1	1	1437	162.2	4.98
P97855	Ras GTPase-activating protein-binding protein 1 OS=Mus musculus GN=G3bp1 PE=1 SV=1 - [G3BP1_MOUSE]	368.51	0.3032	1	10	11	34	465	51.8	5.59
P97379	Ras GTPase-activating protein-binding protein 2 OS=Mus musculus GN=G3bp2 PE=1 SV=2 - [G3BP2_MOUSE]	216.84	0.1743	1	6	7	19	482	54.1	5.62
Q00612	Glucose-6-phosphate 1-dehydrogenase X OS=Mus musculus GN=G6pdx PE=1 SV=3 - [G6PD1_MOUSE]	618.11	0.4388	2	18	18	47	515	59.2	6.49
Q8CFX1	GDH/6PGL endoplasmic bifunctional protein OS=Mus musculus GN=H6pd PE=2 SV=2 - [G6PE_MOUSE]	508.47	0.2548	1	16	17	34	789	88.9	6.93
P06745	Glucose-6-phosphate isomerase OS=Mus musculus GN=Gpi PE=1 SV=4 - [G6PI_MOUSE]	633.4	0.3566	1	19	19	66	558	62.7	8.13
Q9QYY0	GRB2-associated-binding protein 1 OS=Mus musculus GN=Gab1 PE=1 SV=2 - [GAB1_MOUSE]	27.86	0.0144	1	1	1	1	695	76.8	5.67
Q00422	GA-binding protein alpha chain OS=Mus musculus GN=Gabpa PE=1 SV=2 - [GABPA_MOUSE]	63.72	0.1013	1	3	3	4	454	51.3	5
Q99KY4	Cyclin-G-associated kinase OS=Mus musculus GN=Gak PE=1 SV=2 - [GAK_MOUSE]	80.55	0.0322	2	5	5	5	1305	143.6	5.73
Q8R059	UDP-glucose 4-epimerase OS=Mus musculus GN=Gale PE=2 SV=1 - [GALE_MOUSE]	75.66	0.1124	1	3	3	3	347	38.2	6.74
Q68FH4	N-acetylgalactosamine kinase OS=Mus musculus GN=Galk2 PE=1 SV=1 - [GALK2_MOUSE]	44.49	0.0742	1	2	2	2	458	50.5	6.9
Q6PB93	Polypeptide N-acetylgalactosaminyltransferase 2 OS=Mus musculus GN=Galnt2 PE=2 SV=1 - [GALT2_MOUSE]	207.93	0.1684	1	8	8	9	570	64.5	8.53
O35969	Guanidinoacetate N-methyltransferase OS=Mus musculus GN=Gamt PE=1 SV=1 - [GAMT_MOUSE]	40.14	0.072	1	1	1	1	236	26.3	5.71
Q8BHN3	Neutral alpha-glucosidase AB OS=Mus musculus GN=Ganab PE=1 SV=1 - [GANAB_MOUSE]	993.6	0.4036	1	30	30	74	944	106.8	6.06
Q6PAR5	GTPase-activating protein and VPS9 domain-containing protein 1 OS=Mus musculus GN=Gapvd1 PE=1 SV=2 - [GAPD1_MOUSE]	57.48	0.0096	1	1	1	1	1458	162.3	5.19
Q9CYL5	Golgi-associated plant pathogenesis-related protein 1 OS=Mus musculus GN=Glipr2 PE=2 SV=3 - [GAPR1_MOUSE]	231.62	0.5519	1	7	7	16	154	17.1	9.51
Q9CY66	H/ACA ribonucleoprotein complex subunit 1 OS=Mus musculus GN=Gar1 PE=2 SV=1 - [GAR1_MOUSE]	42.25	0.1082	1	2	2	5	231	23.5	11.02
Q9DAS9	Guanine nucleotide-binding protein G(I)/G(S)/G(O) subunit gamma-12 OS=Mus musculus GN=Gng12 PE=1 SV=3 - [GBG12_MOUSE]	73.18	0.5139	1	3	3	3	72	8	8.97
Q80SZ7	Guanine nucleotide-binding protein G(I)/G(S)/G(O) subunit gamma-5 OS=Mus musculus GN=Gng5 PE=2 SV=2 - [GBG5_MOUSE]	20.99	0.1324	1	1	1	1	68	7.3	9.85
Q9Z0E6	Interferon-induced guanylate-binding protein 2 OS=Mus musculus GN=Gbp2 PE=1 SV=1 - [GBP2_MOUSE]	79.22	0.0543	1	2	2	5	589	66.7	5.71
Q8R3R8	Gamma-aminobutyric acid receptor-associated protein-like 1 OS=Mus musculus GN=Gabarapl1 PE=1 SV=2 - [GBRL1_MOUSE]	29.39	0.1538	2	1	1	1	117	14	8.73
Q60759	Glutaryl-CoA dehydrogenase, mitochondrial OS=Mus musculus GN=Gcdh PE=1 SV=2 - [GCDH_MOUSE]	60.36	0.0662	1	2	2	2	438	48.6	8.73
P58854	Gamma-tubulin complex component 3 OS=Mus musculus GN=Tubgcp3 PE=2 SV=2 - [GCP3_MOUSE]	125.89	0.063	1	5	5	6	905	103.4	8.32
Q8BMP6	Golgi resident protein GCP60 OS=Mus musculus GN=Acbd3 PE=1 SV=3 - [GCP60_MOUSE]	174.78	0.0705	1	3	3	9	525	60.1	5.11
P50396	Rab GDP dissociation inhibitor alpha OS=Mus musculus GN=Gdi1 PE=1 SV=3 - [GDIA_MOUSE]	384	0.3333	1	8	11	43	447	50.5	5.08
Q61598	Rab GDP dissociation inhibitor beta OS=Mus musculus GN=Gdi2 PE=1 SV=1 - [GDIB_MOUSE]	947.68	0.618	1	20	23	137	445	50.5	6.25
Q99PT1	Rho GDP-dissociation inhibitor 1 OS=Mus musculus GN=Arhgdia PE=1 SV=3 - [GDIR1_MOUSE]	370.49	0.4853	1	9	9	51	204	23.4	5.2
Q61599	Rho GDP-dissociation inhibitor 2 OS=Mus musculus GN=Arhgdib PE=1 SV=3 - [GDIR2_MOUSE]	21.92	0.105	1	1	1	1	200	22.8	5.11
P13020	Gelsolin OS=Mus musculus GN=Gsn PE=1 SV=3 - [GELS_MOUSE]	677.74	0.2679	1	18	18	68	780	85.9	6.18
Q8BX17	Gem-associated protein 5 OS=Mus musculus GN=Gemin5 PE=2 SV=2 - [GEMI5_MOUSE]	129.26	0.0379	1	5	5	5	1502	166.5	6.71
Q8BHE1	Gem-associated protein 8 OS=Mus musculus GN=Gemin8 PE=1 SV=1 - [GEMI8_MOUSE]	21.21	0.0378	1	1	1	2	238	28.4	7.18
Q8BUV3	Gephyrin OS=Mus musculus GN=Gphn PE=1 SV=2 - [GEPH_MOUSE]	65.23	0.0455	1	2	3	3	769	83.2	5.6
Q9D1H7	Golgi to ER traffic protein 4 homolog OS=Mus musculus GN=Get4 PE=2 SV=2 - [GET4_MOUSE]	121.61	0.1162	1	3	3	7	327	36.5	5.41
P47856	Glutamine--fructose-6-phosphate aminotransferase [isomerizing] 1 OS=Mus musculus GN=Gfpt1 PE=1 SV=3 - [GFPT1_MOUSE]	152.32	0.0933	1	5	5	7	697	78.5	6.84
Q9Z0G0	PDZ domain-containing protein GIPC1 OS=Mus musculus GN=Gipc1 PE=1 SV=1 - [GIPC1_MOUSE]	180.24	0.1712	2	5	5	6	333	36.1	5.91
Q68FF6	ARF GTPase-activating protein GIT1 OS=Mus musculus GN=Git1 PE=1 SV=1 - [GIT1_MOUSE]	45.39	0.0312	1	1	2	2	770	85.2	6.93
Q9JLQ2	ARF GTPase-activating protein GIT2 OS=Mus musculus GN=Git2 PE=1 SV=2 - [GIT2_MOUSE]	84.77	0.048	1	2	3	4	708	78.7	7.72
Q9EPS3	D-glucuronyl C5-epimerase OS=Mus musculus GN=Glce PE=1 SV=2 - [GLCE_MOUSE]	28.62	0.021	1	1	1	1	618	70	8.85
Q9D6Y9	1,4-alpha-glucan-branching enzyme OS=Mus musculus GN=Gbe1 PE=2 SV=1 - [GLGB_MOUSE]	144.38	0.0812	1	4	4	9	702	80.3	6.43
Q9CPV4	Glyoxalase domain-containing protein 4 OS=Mus musculus GN=Glod4 PE=2 SV=1 - [GLOD4_MOUSE]	381.2	0.4698	1	12	12	23	298	33.3	5.47
Q9CQM9	Glutaredoxin-3 OS=Mus musculus GN=Glrx3 PE=1 SV=1 - [GLRX3_MOUSE]	345.81	0.27	1	9	9	18	337	37.8	5.59
Q80Y14	Glutaredoxin-related protein 5, mitochondrial OS=Mus musculus GN=Glrx5 PE=2 SV=2 - [GLRX5_MOUSE]	159.51	0.3355	2	4	4	4	152	16.3	6.55
D3Z7P3	Glutaminase kidney isoform, mitochondrial OS=Mus musculus GN=Gls PE=1 SV=1 - [GLSK_MOUSE]	409.46	0.2745	1	12	13	18	674	73.9	7.99
O08795	Glucosidase 2 subunit beta OS=Mus musculus GN=Prkcsh PE=1 SV=1 - [GLU2B_MOUSE]	430.87	0.2169	1	14	14	44	521	58.8	4.46
P50431	Serine hydroxymethyltransferase, cytosolic OS=Mus musculus GN=Shmt1 PE=1 SV=3 - [GLYC_MOUSE]	139.51	0.1088	1	4	4	6	478	52.6	6.95
Q9R062	Glycogenin-1 OS=Mus musculus GN=Gyg1 PE=2 SV=3 - [GLYG_MOUSE]	78.85	0.1231	1	4	4	6	333	37.4	5.29
Q8K0C9	GDP-mannose 4,6 dehydratase OS=Mus musculus GN=Gmds PE=2 SV=1 - [GMDS_MOUSE]	203.3	0.2043	1	7	7	10	372	42	7.03
Q9CQI3	Glia maturation factor beta OS=Mus musculus GN=Gmfb PE=1 SV=3 - [GMFB_MOUSE]	63.92	0.2254	2	2	2	4	142	16.7	5.16
Q922H4	Mannose-1-phosphate guanyltransferase alpha OS=Mus musculus GN=Gmppa PE=2 SV=1 - [GMPPA_MOUSE]	73.7	0.0952	1	3	3	3	420	46.2	7.62
Q8BTZ7	Mannose-1-phosphate guanyltransferase beta OS=Mus musculus GN=Gmppb PE=2 SV=1 - [GMPPB_MOUSE]	53.52	0.05	1	1	1	1	360	39.9	6.74
Q9DCZ1	GMP reductase 1 OS=Mus musculus GN=Gmpr PE=2 SV=1 - [GMPR1_MOUSE]	38.11	0.0348	1	1	1	2	345	37.5	7.09
P21278	Guanine nucleotide-binding protein subunit alpha-11 OS=Mus musculus GN=Gna11 PE=1 SV=1 - [GNA11_MOUSE]	139.83	0.1922	2	3	5	10	359	42	5.97
P27601	Guanine nucleotide-binding protein subunit alpha-13 OS=Mus musculus GN=Gna13 PE=1 SV=1 - [GNA13_MOUSE]	103.09	0.1061	2	2	3	10	377	44	8.21
Q9JK38	Glucosamine 6-phosphate N-acetyltransferase OS=Mus musculus GN=Gnpnat1 PE=2 SV=1 - [GNA1_MOUSE]	84.51	0.2337	1	3	3	3	184	20.8	7.69
P08752	Guanine nucleotide-binding protein G(i) subunit alpha-2 OS=Mus musculus GN=Gnai2 PE=1 SV=5 - [GNAI2_MOUSE]	534.17	0.4451	7	8	13	42	355	40.5	5.45
Q9DC51	Guanine nucleotide-binding protein G(k) subunit alpha OS=Mus musculus GN=Gnai3 PE=1 SV=3 - [GNAI3_MOUSE]	275.6	0.2514	7	3	8	20	354	40.5	5.69
P21279	Guanine nucleotide-binding protein G(q) subunit alpha OS=Mus musculus GN=Gnaq PE=1 SV=4 - [GNAQ_MOUSE]	87.93	0.1393	2	1	3	6	359	42.1	5.68
P63094	Guanine nucleotide-binding protein G(s) subunit alpha isoforms short OS=Mus musculus GN=Gnas PE=1 SV=1 - [GNAS2_MOUSE]	210.15	0.2462	4	7	8	16	394	45.6	5.96
P36916	Guanine nucleotide-binding protein-like 1 OS=Mus musculus GN=Gnl1 PE=2 SV=4 - [GNL1_MOUSE]	104.11	0.0692	1	3	3	4	607	68.7	5.68
Q8CI11	Guanine nucleotide-binding protein-like 3 OS=Mus musculus GN=Gnl3 PE=1 SV=2 - [GNL3_MOUSE]	240.26	0.132	1	6	6	7	538	60.7	9.11
P98192	Dihydroxyacetone phosphate acyltransferase OS=Mus musculus GN=Gnpat PE=2 SV=1 - [GNPAT_MOUSE]	88.96	0.0531	1	2	2	2	678	76.8	8.13
Q8BFR4	N-acetylglucosamine-6-sulfatase OS=Mus musculus GN=Gns PE=2 SV=1 - [GNS_MOUSE]	151.35	0.1158	1	6	6	6	544	61.1	8.24
Q921M4	Golgin subfamily A member 2 OS=Mus musculus GN=Golga2 PE=2 SV=3 - [GOGA2_MOUSE]	51.65	0.022	1	2	2	2	999	113.2	5
P55937	Golgin subfamily A member 3 OS=Mus musculus GN=Golga3 PE=1 SV=3 - [GOGA3_MOUSE]	212.45	0.0538	1	7	7	7	1487	167.1	5.4
Q8BXA1	Golgi integral membrane protein 4 OS=Mus musculus GN=Golim4 PE=1 SV=1 - [GOLI4_MOUSE]	36.28	0.0443	1	2	2	2	655	76.7	4.83
Q9CRA5	Golgi phosphoprotein 3 OS=Mus musculus GN=Golph3 PE=1 SV=1 - [GOLP3_MOUSE]	116.72	0.1678	2	3	3	5	298	33.7	6.44
Q99JX3	Golgi reassembly-stacking protein 2 OS=Mus musculus GN=Gorasp2 PE=1 SV=3 - [GORS2_MOUSE]	162.76	0.1552	1	4	4	8	451	47	4.79
O35166	Golgi SNAP receptor complex member 2 OS=Mus musculus GN=Gosr2 PE=2 SV=2 - [GOSR2_MOUSE]	28.33	0.0519	1	1	1	1	212	24.7	8.21
Q9CR60	Vesicle transport protein GOT1B OS=Mus musculus GN=Golt1b PE=2 SV=1 - [GOT1B_MOUSE]	32.99	0.1087	1	1	1	2	138	15.4	10.58
Q9QZF2	Glypican-1 OS=Mus musculus GN=Gpc1 PE=1 SV=1 - [GPC1_MOUSE]	61.15	0.0539	1	2	2	2	557	61.3	7.05
P51655	Glypican-4 OS=Mus musculus GN=Gpc4 PE=2 SV=2 - [GPC4_MOUSE]	56.37	0.07	1	3	3	3	557	62.5	6.33
Q3ULJ0	Glycerol-3-phosphate dehydrogenase 1-like protein OS=Mus musculus GN=Gpd1l PE=1 SV=2 - [GPD1L_MOUSE]	301.82	0.3675	2	9	9	16	351	38.2	6.77
Q64521	Glycerol-3-phosphate dehydrogenase, mitochondrial OS=Mus musculus GN=Gpd2 PE=1 SV=2 - [GPDM_MOUSE]	336.26	0.1541	1	8	8	13	727	80.9	6.61
Q9D3W4	GPN-loop GTPase 3 OS=Mus musculus GN=Gpn3 PE=2 SV=1 - [GPN3_MOUSE]	29.91	0.0634	1	1	1	1	284	32.8	4.53
Q8K209	G-protein coupled receptor 56 OS=Mus musculus GN=Gpr56 PE=1 SV=1 - [GPR56_MOUSE]	22.61	0.0247	1	1	1	1	687	77.2	8.59
Q8VDU0	G-protein-signaling modulator 2 OS=Mus musculus GN=Gpsm2 PE=1 SV=2 - [GPSM2_MOUSE]	21.96	0.0221	1	1	1	1	679	75.5	6.95
Q8VD04	GRIP1-associated protein 1 OS=Mus musculus GN=Gripap1 PE=1 SV=1 - [GRAP1_MOUSE]	15.24	0.0124	1	1	1	1	806	92.7	5.25
Q60631	Growth factor receptor-bound protein 2 OS=Mus musculus GN=Grb2 PE=1 SV=1 - [GRB2_MOUSE]	101.12	0.1751	1	4	4	7	217	25.2	6.32
Q91Z53	Glyoxylate reductase/hydroxypyruvate reductase OS=Mus musculus GN=Grhpr PE=1 SV=1 - [GRHPR_MOUSE]	37.45	0.0366	1	1	1	3	328	35.3	7.65
P28798	Granulins OS=Mus musculus GN=Grn PE=1 SV=2 - [GRN_MOUSE]	334.09	0.1969	1	8	8	16	589	63.4	6.8
Q99LP6	GrpE protein homolog 1, mitochondrial OS=Mus musculus GN=Grpel1 PE=1 SV=1 - [GRPE1_MOUSE]	223.44	0.3779	1	7	7	16	217	24.3	8.38
Q8C5Q4	G-rich sequence factor 1 OS=Mus musculus GN=Grsf1 PE=1 SV=2 - [GRSF1_MOUSE]	94.21	0.1942	1	5	5	7	479	53	6.67
O09172	Glutamate--cysteine ligase regulatory subunit OS=Mus musculus GN=Gclm PE=2 SV=1 - [GSH0_MOUSE]	216.07	0.2847	1	6	6	11	274	30.5	5.52
P97494	Glutamate--cysteine ligase catalytic subunit OS=Mus musculus GN=Gclc PE=2 SV=4 - [GSH1_MOUSE]	80.04	0.0989	1	4	4	5	637	72.5	5.9
P51855	Glutathione synthetase OS=Mus musculus GN=Gss PE=2 SV=1 - [GSHB_MOUSE]	168.9	0.1519	1	6	6	10	474	52.2	5.8
P47791	Glutathione reductase, mitochondrial OS=Mus musculus GN=Gsr PE=1 SV=3 - [GSHR_MOUSE]	397.93	0.266	1	10	10	22	500	53.6	7.99
Q61543	Golgi apparatus protein 1 OS=Mus musculus GN=Glg1 PE=1 SV=1 - [GSLG1_MOUSE]	552.35	0.1838	1	19	19	28	1175	133.6	6.84
P24472	Glutathione S-transferase A4 OS=Mus musculus GN=Gsta4 PE=1 SV=3 - [GSTA4_MOUSE]	98.06	0.1847	1	4	4	8	222	25.5	7.39
P10649	Glutathione S-transferase Mu 1 OS=Mus musculus GN=Gstm1 PE=1 SV=2 - [GSTM1_MOUSE]	556	0.7156	1	11	15	95	218	26	7.94
P15626	Glutathione S-transferase Mu 2 OS=Mus musculus GN=Gstm2 PE=1 SV=2 - [GSTM2_MOUSE]	202.13	0.2615	3	2	6	32	218	25.7	7.39
P48774	Glutathione S-transferase Mu 5 OS=Mus musculus GN=Gstm5 PE=1 SV=1 - [GSTM5_MOUSE]	131.18	0.2455	1	4	5	7	224	26.6	7.21
O09131	Glutathione S-transferase omega-1 OS=Mus musculus GN=Gsto1 PE=2 SV=2 - [GSTO1_MOUSE]	413.36	0.5958	2	14	14	43	240	27.5	7.36
P19157	Glutathione S-transferase P 1 OS=Mus musculus GN=Gstp1 PE=1 SV=2 - [GSTP1_MOUSE]	290.59	0.4095	2	6	6	32	210	23.6	7.87
Q8K297	Procollagen galactosyltransferase 1 OS=Mus musculus GN=Colgalt1 PE=1 SV=2 - [GT251_MOUSE]	372.66	0.2156	1	12	12	26	617	71	7.28
Q9ESZ8	General transcription factor II-I OS=Mus musculus GN=Gtf2i PE=1 SV=3 - [GTF2I_MOUSE]	206.12	0.0982	1	9	9	13	998	112.2	6.55
O08582	GTP-binding protein 1 OS=Mus musculus GN=Gtpbp1 PE=1 SV=2 - [GTPB1_MOUSE]	108.64	0.0838	1	4	4	6	668	72.3	8.29
Q923K4	tRNA modification GTPase GTPBP3, mitochondrial OS=Mus musculus GN=Gtpbp3 PE=2 SV=1 - [GTPB3_MOUSE]	55.01	0.0285	1	1	1	2	492	52.1	6.05
P17809	Solute carrier family 2, facilitated glucose transporter member 1 OS=Mus musculus GN=Slc2a1 PE=1 SV=4 - [GTR1_MOUSE]	12.99	0.0203	1	1	1	1	492	53.9	8.87
Q3THK7	GMP synthase [glutamine-hydrolyzing] OS=Mus musculus GN=Gmps PE=1 SV=2 - [GUAA_MOUSE]	848.35	0.4618	1	24	24	58	693	76.7	6.73
Q9Z1E4	Glycogen [starch] synthase, muscle OS=Mus musculus GN=Gys1 PE=1 SV=2 - [GYS1_MOUSE]	85.11	0.0393	1	2	2	3	738	83.9	6.11
P43275	Histone H1.1 OS=Mus musculus GN=Hist1h1a PE=1 SV=2 - [H11_MOUSE]	169.05	0.1737	1	2	5	20	213	21.8	10.93
P15864	Histone H1.2 OS=Mus musculus GN=Hist1h1c PE=1 SV=2 - [H12_MOUSE]	358.36	0.3726	2	6	11	43	212	21.3	11
P43274	Histone H1.4 OS=Mus musculus GN=Hist1h1e PE=1 SV=2 - [H14_MOUSE]	290.87	0.3105	2	3	10	33	219	22	11.11
P43276	Histone H1.5 OS=Mus musculus GN=Hist1h1b PE=1 SV=2 - [H15_MOUSE]	199.08	0.296	1	4	7	18	223	22.6	10.92
Q3TC93	HCLS1-binding protein 3 OS=Mus musculus GN=Hs1bp3 PE=1 SV=2 - [H1BP3_MOUSE]	179.64	0.2152	1	4	4	8	395	43.7	4.98
Q8CGP6	Histone H2A type 1-H OS=Mus musculus GN=Hist1h2ah PE=1 SV=3 - [H2A1H_MOUSE]	267.51	0.4141	6	2	7	163	128	13.9	11.03
P27661	Histone H2AX OS=Mus musculus GN=H2afx PE=1 SV=2 - [H2AX_MOUSE]	365.05	0.4965	2	6	10	65	143	15.1	10.74
Q9QZQ8	Core histone macro-H2A.1 OS=Mus musculus GN=H2afy PE=1 SV=3 - [H2AY_MOUSE]	151.3	0.1586	1	4	4	9	372	39.7	9.8
Q64524	Histone H2B type 2-E OS=Mus musculus GN=Hist2h2be PE=1 SV=3 - [H2B2E_MOUSE]	283.47	0.5079	3	1	7	158	126	14	10.32
P02301	Histone H3.3C OS=Mus musculus GN=H3f3c PE=3 SV=3 - [H3C_MOUSE]	241.51	0.6029	2	2	9	55	136	15.3	11.14
P01901	H-2 class I histocompatibility antigen, K-B alpha chain OS=Mus musculus GN=H2-K1 PE=1 SV=1 - [HA1B_MOUSE]	90.2	0.1301	4	3	3	5	369	41.3	6.39
P01897	H-2 class I histocompatibility antigen, L-D alpha chain OS=Mus musculus GN=H2-L PE=1 SV=2 - [HA1L_MOUSE]	36.64	0.0359	2	1	1	1	362	40.7	6.25
Q8K2C9	Very-long-chain (3R)-3-hydroxyacyl-[acyl-carrier protein] dehydratase 3 OS=Mus musculus GN=ptplad1 PE=1 SV=2 - [HACD3_MOUSE]	53.72	0.0884	1	2	2	3	362	43.1	9.13
Q61039	Heart- and neural crest derivatives-expressed protein 2 OS=Mus musculus GN=Hand2 PE=1 SV=3 - [HAND2_MOUSE]	18.86	0.0323	1	1	1	1	217	23.7	9.17
Q3UHX2	28 kDa heat- and acid-stable phosphoprotein OS=Mus musculus GN=Pdap1 PE=1 SV=1 - [HAP28_MOUSE]	400.16	0.3923	1	8	8	34	181	20.6	7.39
Q8BY71	Histone acetyltransferase type B catalytic subunit OS=Mus musculus GN=Hat1 PE=2 SV=1 - [HAT1_MOUSE]	228.98	0.2548	1	7	7	15	416	49.2	6.33
Q8QZX2	HAUS augmin-like complex subunit 3 OS=Mus musculus GN=Haus3 PE=2 SV=1 - [HAUS3_MOUSE]	27.91	0.0175	1	1	1	1	570	66.3	5.29
Q8BKT8	HAUS augmin-like complex subunit 7 OS=Mus musculus GN=Haus7 PE=1 SV=2 - [HAUS7_MOUSE]	38.47	0.0522	1	2	2	2	364	40.6	5.06
P01942	Hemoglobin subunit alpha OS=Mus musculus GN=Hba PE=1 SV=2 - [HBA_MOUSE]	128.24	0.4859	2	5	5	15	142	15.1	8.22
P04443	Hemoglobin subunit beta-H0 OS=Mus musculus GN=Hbb-bh0 PE=2 SV=5 - [HBB0_MOUSE]	27.71	0.068	2	1	1	1	147	16.4	8.62
P02088	Hemoglobin subunit beta-1 OS=Mus musculus GN=Hbb-b1 PE=1 SV=2 - [HBB1_MOUSE]	157.4	0.3469	1	2	4	18	147	15.8	7.65
P02089	Hemoglobin subunit beta-2 OS=Mus musculus GN=Hbb-b2 PE=1 SV=2 - [HBB2_MOUSE]	107.28	0.2313	2	2	4	15	147	15.9	8.05
Q69ZS7	HBS1-like protein OS=Mus musculus GN=Hbs1l PE=1 SV=2 - [HBS1L_MOUSE]	76.03	0.0557	1	2	2	2	682	75.1	6.46
O08756	3-hydroxyacyl-CoA dehydrogenase type-2 OS=Mus musculus GN=Hsd17b10 PE=1 SV=4 - [HCD2_MOUSE]	136.78	0.2146	1	3	3	5	261	27.4	8.41
Q61425	Hydroxyacyl-coenzyme A dehydrogenase, mitochondrial OS=Mus musculus GN=Hadh PE=1 SV=2 - [HCDH_MOUSE]	273.03	0.2548	3	7	7	27	314	34.4	8.65
Q61191	Host cell factor 1 OS=Mus musculus GN=Hcfc1 PE=1 SV=2 - [HCFC1_MOUSE]	253.62	0.068	1	13	13	16	2045	210.3	7.18
O09106	Histone deacetylase 1 OS=Mus musculus GN=Hdac1 PE=1 SV=1 - [HDAC1_MOUSE]	315.76	0.2054	2	4	7	14	482	55	5.48
P70288	Histone deacetylase 2 OS=Mus musculus GN=Hdac2 PE=1 SV=1 - [HDAC2_MOUSE]	181.24	0.1393	2	2	5	7	488	55.3	5.91
Q9Z2V5	Histone deacetylase 6 OS=Mus musculus GN=Hdac6 PE=1 SV=3 - [HDAC6_MOUSE]	257.14	0.0748	1	6	6	10	1149	125.7	5.78
Q3SXD3	HD domain-containing protein 2 OS=Mus musculus GN=Hddc2 PE=2 SV=1 - [HDDC2_MOUSE]	87.68	0.1508	1	2	2	4	199	22.7	5.02
P51859	Hepatoma-derived growth factor OS=Mus musculus GN=Hdgf PE=1 SV=2 - [HDGF_MOUSE]	447.62	0.4388	1	12	13	47	237	26.3	4.83
Q3UMU9	Hepatoma-derived growth factor-related protein 2 OS=Mus musculus GN=Hdgfrp2 PE=1 SV=1 - [HDGR2_MOUSE]	148.07	0.1241	1	6	7	11	669	74.2	8.66
Q9JMG7	Hepatoma-derived growth factor-related protein 3 OS=Mus musculus GN=Hdgfrp3 PE=1 SV=2 - [HDGR3_MOUSE]	56.3	0.0792	1	1	2	3	202	22.4	8.4
Q3UGR5	Haloacid dehalogenase-like hydrolase domain-containing protein 2 OS=Mus musculus GN=Hdhd2 PE=1 SV=2 - [HDHD2_MOUSE]	128.83	0.1969	1	4	4	4	259	28.7	6.05
P42859	Huntingtin OS=Mus musculus GN=Htt PE=1 SV=2 - [HD_MOUSE]	66.14	0.0083	1	2	2	2	3119	344.5	6.29
Q8BQM4	HEAT repeat-containing protein 3 OS=Mus musculus GN=Heatr3 PE=2 SV=1 - [HEAT3_MOUSE]	214.87	0.0913	1	6	6	10	679	74.3	5.01
Q69ZR2	E3 ubiquitin-protein ligase HECTD1 OS=Mus musculus GN=Hectd1 PE=1 SV=2 - [HECD1_MOUSE]	47.16	0.0126	1	3	3	3	2618	289.9	5.41
Q60848	Lymphocyte-specific helicase OS=Mus musculus GN=Hells PE=1 SV=2 - [HELLS_MOUSE]	135.04	0.0658	1	4	4	5	821	95.1	8
P10518	Delta-aminolevulinic acid dehydratase OS=Mus musculus GN=Alad PE=1 SV=1 - [HEM2_MOUSE]	431.86	0.403	1	12	12	25	330	36	6.79
P22907	Porphobilinogen deaminase OS=Mus musculus GN=Hmbs PE=2 SV=2 - [HEM3_MOUSE]	221.21	0.2161	1	4	4	7	361	39.3	6.87
P36552	Coproporphyrinogen-III oxidase, mitochondrial OS=Mus musculus GN=Cpox PE=1 SV=2 - [HEM6_MOUSE]	80.35	0.1512	1	5	5	5	443	49.7	8.53
P20060	Beta-hexosaminidase subunit beta OS=Mus musculus GN=Hexb PE=2 SV=2 - [HEXB_MOUSE]	84.46	0.1119	1	4	4	5	536	61.1	8.12
Q8R409	Protein HEXIM1 OS=Mus musculus GN=Hexim1 PE=1 SV=1 - [HEXI1_MOUSE]	87.15	0.1152	1	4	4	5	356	40.2	5.38
Q99LI8	Hepatocyte growth factor-regulated tyrosine kinase substrate OS=Mus musculus GN=Hgs PE=1 SV=2 - [HGS_MOUSE]	151.84	0.0877	1	7	7	7	775	86	6.16
Q8QZS1	3-hydroxyisobutyryl-CoA hydrolase, mitochondrial OS=Mus musculus GN=Hibch PE=1 SV=1 - [HIBCH_MOUSE]	43.79	0.026	1	1	1	2	385	43	8.06
P70349	Histidine triad nucleotide-binding protein 1 OS=Mus musculus GN=Hint1 PE=1 SV=3 - [HINT1_MOUSE]	189.37	0.627	1	5	5	16	126	13.8	6.87
Q9D0S9	Histidine triad nucleotide-binding protein 2, mitochondrial OS=Mus musculus GN=Hint2 PE=1 SV=1 - [HINT2_MOUSE]	100.73	0.319	1	3	3	5	163	17.3	9.82
Q8VD75	Huntingtin-interacting protein 1 OS=Mus musculus GN=Hip1 PE=1 SV=2 - [HIP1_MOUSE]	196.59	0.0758	1	6	7	8	1029	115.1	5.43
Q8BLH7	HIRA-interacting protein 3 OS=Mus musculus GN=Hirip3 PE=1 SV=1 - [HIRP3_MOUSE]	43.25	0.0316	1	2	2	2	601	65.2	7.84
Q9D8V0	Minor histocompatibility antigen H13 OS=Mus musculus GN=Hm13 PE=1 SV=1 - [HM13_MOUSE]	82.69	0.0847	1	3	3	6	378	41.7	6.04
Q9DC33	High mobility group protein 20A OS=Mus musculus GN=Hmg20a PE=2 SV=1 - [HM20A_MOUSE]	53.31	0.0751	1	2	2	3	346	39.9	6.4
Q9Z104	SWI/SNF-related matrix-associated actin-dependent regulator of chromatin subfamily E member 1-related OS=Mus musculus GN=Hmg20b PE=1 SV=1 - [HM20B_MOUSE]	23.96	0.0379	1	1	1	1	317	35.8	9.29
Q8JZK9	Hydroxymethylglutaryl-CoA synthase, cytoplasmic OS=Mus musculus GN=Hmgcs1 PE=1 SV=1 - [HMCS1_MOUSE]	331.96	0.225	2	10	10	14	520	57.5	5.99
P17095	High mobility group protein HMG-I/HMG-Y OS=Mus musculus GN=Hmga1 PE=1 SV=4 - [HMGA1_MOUSE]	41.14	0.2243	1	2	2	3	107	11.6	10.32
P52927	High mobility group protein HMGI-C OS=Mus musculus GN=Hmga2 PE=1 SV=1 - [HMGA2_MOUSE]	79.8	0.4907	1	4	4	7	108	11.8	10.62
P63158	High mobility group protein B1 OS=Mus musculus GN=Hmgb1 PE=1 SV=2 - [HMGB1_MOUSE]	306.06	0.5442	1	11	13	70	215	24.9	5.74
P30681	High mobility group protein B2 OS=Mus musculus GN=Hmgb2 PE=1 SV=3 - [HMGB2_MOUSE]	311.99	0.4095	1	8	10	61	210	24.1	7.31
O54879	High mobility group protein B3 OS=Mus musculus GN=Hmgb3 PE=2 SV=3 - [HMGB3_MOUSE]	110.15	0.275	1	3	4	12	200	23	8.37
P38060	Hydroxymethylglutaryl-CoA lyase, mitochondrial OS=Mus musculus GN=Hmgcl PE=1 SV=2 - [HMGCL_MOUSE]	69.73	0.12	1	3	3	3	325	34.2	8.41
P18608	Non-histone chromosomal protein HMG-14 OS=Mus musculus GN=Hmgn1 PE=1 SV=2 - [HMGN1_MOUSE]	60.64	0.1875	1	3	3	14	96	10.1	9.76
P09602	Non-histone chromosomal protein HMG-17 OS=Mus musculus GN=Hmgn2 PE=1 SV=2 - [HMGN2_MOUSE]	76.08	0.3667	1	3	3	4	90	9.4	9.99
Q9JL35	High mobility group nucleosome-binding domain-containing protein 5 OS=Mus musculus GN=Hmgn5 PE=1 SV=2 - [HMGN5_MOUSE]	61.97	0.0443	1	2	2	2	406	45.3	4.37
P14901	Heme oxygenase 1 OS=Mus musculus GN=Hmox1 PE=1 SV=1 - [HMOX1_MOUSE]	87.41	0.1869	1	3	3	4	289	32.9	6.54
O70252	Heme oxygenase 2 OS=Mus musculus GN=Hmox2 PE=2 SV=1 - [HMOX2_MOUSE]	57.95	0.0667	1	2	2	3	315	35.7	5.87
Q6PGH2	Hematological and neurological expressed 1-like protein OS=Mus musculus GN=Hn1l PE=1 SV=1 - [HN1L_MOUSE]	243.7	0.5474	1	9	9	19	190	20	8.62
P97825	Hematological and neurological expressed 1 protein OS=Mus musculus GN=Hn1 PE=1 SV=3 - [HN1_MOUSE]	149.62	0.2792	1	3	3	7	154	16.1	5.31
P27889	Hepatocyte nuclear factor 1-beta OS=Mus musculus GN=Hnf1b PE=1 SV=2 - [HNF1B_MOUSE]	41.06	0.0251	1	1	1	1	558	61.5	7.75
Q9Z130	Heterogeneous nuclear ribonucleoprotein D-like OS=Mus musculus GN=Hnrnpdl PE=1 SV=1 - [HNRDL_MOUSE]	274.59	0.3189	1	7	9	34	301	33.5	7.31
O35737	Heterogeneous nuclear ribonucleoprotein H OS=Mus musculus GN=Hnrnph1 PE=1 SV=3 - [HNRH1_MOUSE]	412.56	0.3118	1	2	10	53	449	49.2	6.3
P70333	Heterogeneous nuclear ribonucleoprotein H2 OS=Mus musculus GN=Hnrnph2 PE=2 SV=1 - [HNRH2_MOUSE]	347.97	0.3118	1	3	10	34	449	49.2	6.3
Q8VDM6	Heterogeneous nuclear ribonucleoprotein U-like protein 1 OS=Mus musculus GN=Hnrnpul1 PE=1 SV=1 - [HNRL1_MOUSE]	134.96	0.0966	1	5	5	8	859	95.9	6.58
Q921F4	Heterogeneous nuclear ribonucleoprotein L-like OS=Mus musculus GN=Hnrnpll PE=1 SV=3 - [HNRLL_MOUSE]	256.52	0.1387	1	6	6	12	591	64.1	5.85
Q9Z204	Heterogeneous nuclear ribonucleoproteins C1/C2 OS=Mus musculus GN=Hnrnpc PE=1 SV=1 - [HNRPC_MOUSE]	573.65	0.4856	2	15	15	64	313	34.4	5.05
Q60668	Heterogeneous nuclear ribonucleoprotein D0 OS=Mus musculus GN=Hnrnpd PE=1 SV=2 - [HNRPD_MOUSE]	374.84	0.2676	1	8	10	54	355	38.3	7.81
Q9Z2X1	Heterogeneous nuclear ribonucleoprotein F OS=Mus musculus GN=Hnrnpf PE=1 SV=3 - [HNRPF_MOUSE]	497.43	0.4554	1	11	13	123	415	45.7	5.49
Q8R081	Heterogeneous nuclear ribonucleoprotein L OS=Mus musculus GN=Hnrnpl PE=1 SV=2 - [HNRPL_MOUSE]	446.24	0.2696	1	12	12	46	586	63.9	8.1
Q9D0E1	Heterogeneous nuclear ribonucleoprotein M OS=Mus musculus GN=Hnrnpm PE=1 SV=3 - [HNRPM_MOUSE]	1013.44	0.3909	1	25	25	77	729	77.6	8.63
Q7TMK9	Heterogeneous nuclear ribonucleoprotein Q OS=Mus musculus GN=Syncrip PE=1 SV=2 - [HNRPQ_MOUSE]	773.74	0.3291	1	20	20	49	623	69.6	8.59
Q8VEK3	Heterogeneous nuclear ribonucleoprotein U OS=Mus musculus GN=Hnrnpu PE=1 SV=1 - [HNRPU_MOUSE]	1003.9	0.3475	1	29	29	99	800	87.9	6.24
Q9DCU9	4-hydroxy-2-oxoglutarate aldolase, mitochondrial OS=Mus musculus GN=Hoga1 PE=2 SV=1 - [HOGA1_MOUSE]	63.2	0.1059	1	2	2	2	321	34.6	7.72
Q99JP6	Homer protein homolog 3 OS=Mus musculus GN=Homer3 PE=1 SV=2 - [HOME3_MOUSE]	191.24	0.2107	3	6	6	7	356	39.7	5.36
Q8BUK6	Protein Hook homolog 3 OS=Mus musculus GN=Hook3 PE=1 SV=2 - [HOOK3_MOUSE]	229.32	0.124	1	7	7	11	718	83.2	5.19
Q3TEA8	Heterochromatin protein 1-binding protein 3 OS=Mus musculus GN=Hp1bp3 PE=1 SV=1 - [HP1B3_MOUSE]	148.99	0.1119	1	5	5	9	554	60.8	9.7
Q99P31	Hsp70-binding protein 1 OS=Mus musculus GN=Hspbp1 PE=2 SV=1 - [HPBP1_MOUSE]	205.73	0.2353	1	5	5	6	357	39.1	5.36
P62748	Hippocalcin-like protein 1 OS=Mus musculus GN=Hpcal1 PE=2 SV=2 - [HPCL1_MOUSE]	131.02	0.2228	2	4	4	9	193	22.3	5.5
Q64531	Hypoxanthine-guanine phosphoribosyltransferase (Fragment) OS=Mus spretus GN=Hprt1 PE=1 SV=3 - [HPRT_MUSSP]	204.35	0.285	2	6	6	9	214	24.1	6.14
Q9D8M3	Heme transporter HRG1 OS=Mus musculus GN=Slc48a1 PE=2 SV=1 - [HRG1_MOUSE]	33.6	0.0822	1	1	1	1	146	16.5	9.45
Q61699	Heat shock protein 105 kDa OS=Mus musculus GN=Hsph1 PE=1 SV=2 - [HS105_MOUSE]	1128.93	0.373	2	25	27	78	858	96.3	5.53
Q8R3H7	Heparan sulfate 2-O-sulfotransferase 1 OS=Mus musculus GN=Hs2st1 PE=1 SV=2 - [HS2ST_MOUSE]	38.89	0.0478	1	1	1	1	356	41.8	8.57
P16627	Heat shock 70 kDa protein 1-like OS=Mus musculus GN=Hspa1l PE=2 SV=4 - [HS71L_MOUSE]	313.57	0.1232	1	1	7	56	641	70.6	6.24
P48722	Heat shock 70 kDa protein 4L OS=Mus musculus GN=Hspa4l PE=1 SV=2 - [HS74L_MOUSE]	548.07	0.2983	1	16	18	32	838	94.3	5.74
P07901	Heat shock protein HSP 90-alpha OS=Mus musculus GN=Hsp90aa1 PE=1 SV=4 - [HS90A_MOUSE]	2023.2	0.603	2	28	45	371	733	84.7	5.01
P11499	Heat shock protein HSP 90-beta OS=Mus musculus GN=Hsp90ab1 PE=1 SV=3 - [HS90B_MOUSE]	2172.42	0.6423	2	29	48	568	724	83.2	5.03
Q8K3A0	Iron-sulfur cluster co-chaperone protein HscB, mitochondrial OS=Mus musculus GN=Hscb PE=2 SV=2 - [HSC20_MOUSE]	61.5	0.1068	1	1	2	3	234	26.6	7.37
Q2TPA8	Hydroxysteroid dehydrogenase-like protein 2 OS=Mus musculus GN=Hsdl2 PE=1 SV=1 - [HSDL2_MOUSE]	59.35	0.0673	1	2	2	3	490	54.2	6.74
Q8BM72	Heat shock 70 kDa protein 13 OS=Mus musculus GN=Hspa13 PE=2 SV=1 - [HSP13_MOUSE]	43.92	0.0552	1	2	2	2	471	51.7	5.63
P17156	Heat shock-related 70 kDa protein 2 OS=Mus musculus GN=Hspa2 PE=1 SV=2 - [HSP72_MOUSE]	608.6	0.2638	1	3	15	106	633	69.6	5.67
Q61316	Heat shock 70 kDa protein 4 OS=Mus musculus GN=Hspa4 PE=1 SV=1 - [HSP74_MOUSE]	1162.79	0.4911	1	27	30	116	841	94.1	5.24
Q99M31	Heat shock 70 kDa protein 14 OS=Mus musculus GN=Hspa14 PE=2 SV=2 - [HSP7E_MOUSE]	249.82	0.1631	1	7	7	11	509	54.6	5.92
P14602	Heat shock protein beta-1 OS=Mus musculus GN=Hspb1 PE=1 SV=3 - [HSPB1_MOUSE]	725.88	0.9091	1	16	16	251	209	23	6.55
Q5PRF0	HEAT repeat-containing protein 5A OS=Mus musculus GN=Heatr5a PE=2 SV=2 - [HTR5A_MOUSE]	64.05	0.0206	1	3	3	3	2038	219.8	6.76
Q8C547	HEAT repeat-containing protein 5B OS=Mus musculus GN=Heatr5b PE=2 SV=3 - [HTR5B_MOUSE]	111.59	0.0266	1	4	4	4	2070	224.2	7.14
Q9R118	Serine protease HTRA1 OS=Mus musculus GN=Htra1 PE=1 SV=2 - [HTRA1_MOUSE]	100.97	0.0771	1	3	3	4	480	51.2	7.65
Q9JIY5	Serine protease HTRA2, mitochondrial OS=Mus musculus GN=Htra2 PE=1 SV=2 - [HTRA2_MOUSE]	96.39	0.1135	1	3	3	3	458	49.3	9.6
Q8BGC0	HIV Tat-specific factor 1 homolog OS=Mus musculus GN=Htatsf1 PE=1 SV=1 - [HTSF1_MOUSE]	24.65	0.0106	1	1	1	1	757	86.2	4.4
Q7TMY8	E3 ubiquitin-protein ligase HUWE1 OS=Mus musculus GN=Huwe1 PE=1 SV=5 - [HUWE1_MOUSE]	207.48	0.026	1	7	7	8	4377	482.3	5.22
P17710	Hexokinase-1 OS=Mus musculus GN=Hk1 PE=1 SV=3 - [HXK1_MOUSE]	650.7	0.2146	1	17	19	32	974	108.2	6.8
O08528	Hexokinase-2 OS=Mus musculus GN=Hk2 PE=2 SV=1 - [HXK2_MOUSE]	525.91	0.1919	2	13	15	29	917	102.5	6.11
Q9D379	Epoxide hydrolase 1 OS=Mus musculus GN=Ephx1 PE=1 SV=2 - [HYEP_MOUSE]	44.32	0.0176	1	1	1	1	455	52.5	8.35
Q9JKR6	Hypoxia up-regulated protein 1 OS=Mus musculus GN=Hyou1 PE=1 SV=1 - [HYOU1_MOUSE]	919.14	0.3894	1	27	27	67	999	111.1	5.19
Q9CR41	Huntingtin-interacting protein K OS=Mus musculus GN=Hypk PE=2 SV=2 - [HYPK_MOUSE]	167.96	0.3178	1	5	5	13	129	14.7	4.93
Q8R3Y8	Interferon regulatory factor 2-binding protein 1 OS=Mus musculus GN=Irf2bp1 PE=1 SV=2 - [I2BP1_MOUSE]	61.15	0.0805	1	2	3	4	584	61.7	8.18
E9Q1P8	Interferon regulatory factor 2-binding protein 2 OS=Mus musculus GN=Irf2bp2 PE=1 SV=1 - [I2BP2_MOUSE]	162.94	0.1368	1	3	5	12	570	59.3	8.69
Q8K3X4	Interferon regulatory factor 2-binding protein-like OS=Mus musculus GN=Irf2bpl PE=1 SV=1 - [I2BPL_MOUSE]	107.59	0.0658	1	2	4	4	775	80.5	8.24
Q9DB29	Isoamyl acetate-hydrolyzing esterase 1 homolog OS=Mus musculus GN=Iah1 PE=2 SV=1 - [IAH1_MOUSE]	85.66	0.1767	1	3	3	3	249	28	5.52
P51125	Calpastatin OS=Mus musculus GN=Cast PE=1 SV=2 - [ICAL_MOUSE]	490.43	0.2487	1	14	14	29	788	84.9	5.52
Q61189	Methylosome subunit pICln OS=Mus musculus GN=Clns1a PE=2 SV=1 - [ICLN_MOUSE]	38.91	0.1059	1	2	2	3	236	26	4.12
Q8R035	Peptidyl-tRNA hydrolase ICT1, mitochondrial OS=Mus musculus GN=Ict1 PE=1 SV=1 - [ICT1_MOUSE]	50.84	0.1311	1	2	2	3	206	23.5	10.18
Q9JHR7	Insulin-degrading enzyme OS=Mus musculus GN=Ide PE=1 SV=1 - [IDE_MOUSE]	489.81	0.2345	1	20	20	30	1019	117.7	6.54
Q9D6R2	Isocitrate dehydrogenase [NAD] subunit alpha, mitochondrial OS=Mus musculus GN=Idh3a PE=1 SV=1 - [IDH3A_MOUSE]	377.8	0.3716	1	12	12	35	366	39.6	6.73
O88844	Isocitrate dehydrogenase [NADP] cytoplasmic OS=Mus musculus GN=Idh1 PE=1 SV=2 - [IDHC_MOUSE]	325.03	0.3623	1	12	13	26	414	46.6	7.17
P70404	Isocitrate dehydrogenase [NAD] subunit gamma 1, mitochondrial OS=Mus musculus GN=Idh3g PE=1 SV=1 - [IDHG1_MOUSE]	114.63	0.1272	1	4	4	5	393	42.8	9.01
P54071	Isocitrate dehydrogenase [NADP], mitochondrial OS=Mus musculus GN=Idh2 PE=1 SV=3 - [IDHP_MOUSE]	667.08	0.4535	2	17	18	64	452	50.9	8.69
P58044	Isopentenyl-diphosphate Delta-isomerase 1 OS=Mus musculus GN=Idi1 PE=2 SV=1 - [IDI1_MOUSE]	227.4	0.2907	1	5	5	14	227	26.3	6.16
Q60872	Eukaryotic translation initiation factor 1A OS=Mus musculus GN=Eif1a PE=2 SV=3 - [IF1A_MOUSE]	219.03	0.5417	2	1	7	15	144	16.5	5.24
Q6ZWX6	Eukaryotic translation initiation factor 2 subunit 1 OS=Mus musculus GN=Eif2s1 PE=1 SV=3 - [IF2A_MOUSE]	521.06	0.4984	1	15	15	38	315	36.1	5.08
O88477	Insulin-like growth factor 2 mRNA-binding protein 1 OS=Mus musculus GN=Igf2bp1 PE=1 SV=1 - [IF2B1_MOUSE]	98.14	0.0572	1	3	3	5	577	63.4	9.2
Q5SF07	Insulin-like growth factor 2 mRNA-binding protein 2 OS=Mus musculus GN=Igf2bp2 PE=1 SV=1 - [IF2B2_MOUSE]	298.46	0.1926	1	8	9	14	592	65.5	8.03
Q9CPN8	Insulin-like growth factor 2 mRNA-binding protein 3 OS=Mus musculus GN=Igf2bp3 PE=1 SV=1 - [IF2B3_MOUSE]	71.81	0.0691	1	2	3	4	579	63.5	8.87
Q99L45	Eukaryotic translation initiation factor 2 subunit 2 OS=Mus musculus GN=Eif2s2 PE=1 SV=1 - [IF2B_MOUSE]	221.06	0.2931	1	8	8	11	331	38.1	5.8
Q9Z0N1	Eukaryotic translation initiation factor 2 subunit 3, X-linked OS=Mus musculus GN=Eif2s3x PE=1 SV=2 - [IF2G_MOUSE]	347.28	0.3665	2	12	12	25	472	51	8.4
Q05D44	Eukaryotic translation initiation factor 5B OS=Mus musculus GN=Eif5b PE=1 SV=2 - [IF2P_MOUSE]	279.68	0.1308	1	12	12	17	1216	137.5	5.59
Q91VC3	Eukaryotic initiation factor 4A-III OS=Mus musculus GN=Eif4a3 PE=2 SV=3 - [IF4A3_MOUSE]	549.33	0.4404	1	14	16	47	411	46.8	6.73
Q8BGD9	Eukaryotic translation initiation factor 4B OS=Mus musculus GN=Eif4b PE=1 SV=1 - [IF4B_MOUSE]	423.73	0.257	1	13	13	35	611	68.8	5.67
Q8BMB3	Eukaryotic translation initiation factor 4E type 2 OS=Mus musculus GN=Eif4e2 PE=1 SV=1 - [IF4E2_MOUSE]	60.71	0.098	1	2	2	3	245	28.2	8.87
P63073	Eukaryotic translation initiation factor 4E OS=Mus musculus GN=Eif4e PE=1 SV=1 - [IF4E_MOUSE]	194.98	0.2396	1	6	6	19	217	25	6.15
Q6NZJ6	Eukaryotic translation initiation factor 4 gamma 1 OS=Mus musculus GN=Eif4g1 PE=1 SV=1 - [IF4G1_MOUSE]	1040.51	0.1969	1	24	27	67	1600	176	5.4
Q62448	Eukaryotic translation initiation factor 4 gamma 2 OS=Mus musculus GN=Eif4g2 PE=1 SV=2 - [IF4G2_MOUSE]	281.95	0.1236	1	9	9	14	906	102	7.14
Q80XI3	Eukaryotic translation initiation factor 4 gamma 3 OS=Mus musculus GN=Eif4g3 PE=1 SV=2 - [IF4G3_MOUSE]	139.53	0.0342	1	2	5	15	1579	174.8	5.53
Q9WUK2	Eukaryotic translation initiation factor 4H OS=Mus musculus GN=Eif4h PE=1 SV=3 - [IF4H_MOUSE]	346.11	0.4113	1	8	8	25	248	27.3	7.23
P59325	Eukaryotic translation initiation factor 5 OS=Mus musculus GN=Eif5 PE=1 SV=1 - [IF5_MOUSE]	260.89	0.2238	2	9	9	16	429	48.9	5.52
O55135	Eukaryotic translation initiation factor 6 OS=Mus musculus GN=Eif6 PE=1 SV=2 - [IF6_MOUSE]	184.44	0.4122	1	5	5	20	245	26.5	4.74
P15092	Interferon-activable protein 204 OS=Mus musculus GN=Ifi204 PE=1 SV=2 - [IFI4_MOUSE]	100.16	0.05	1	1	2	3	640	71.6	8.69
Q8CGE8	Interferon-activable protein 205-A OS=Mus musculus GN=Ifi205a PE=2 SV=1 - [IFI5A_MOUSE]	42.88	0.0891	1	1	3	3	404	45.1	8.48
Q64345	Interferon-induced protein with tetratricopeptide repeats 3 OS=Mus musculus GN=Ifit3 PE=2 SV=1 - [IFIT3_MOUSE]	23.83	0.0323	1	1	1	1	403	47.2	5.64
O35594	Intraflagellar transport protein 81 homolog OS=Mus musculus GN=Ift81 PE=1 SV=4 - [IFT81_MOUSE]	21.73	0.0133	1	1	1	4	676	79.2	8.75
Q61249	Immunoglobulin-binding protein 1 OS=Mus musculus GN=Igbp1 PE=1 SV=1 - [IGBP1_MOUSE]	60.28	0.1265	1	3	3	3	340	38.9	6.18
P09535	Insulin-like growth factor II OS=Mus musculus GN=Igf2 PE=1 SV=1 - [IGF2_MOUSE]	48.2	0.0889	1	1	1	2	180	20	9.16
Q9Z1E3	NF-kappa-B inhibitor alpha OS=Mus musculus GN=Nfkbia PE=1 SV=2 - [IKBA_MOUSE]	33.05	0.0637	1	1	1	1	314	35	4.78
Q60680	Inhibitor of nuclear factor kappa-B kinase subunit alpha OS=Mus musculus GN=Chuk PE=1 SV=1 - [IKKA_MOUSE]	47.82	0.0228	1	1	2	2	745	84.7	6.77
O88351	Inhibitor of nuclear factor kappa-B kinase subunit beta OS=Mus musculus GN=Ikbkb PE=1 SV=1 - [IKKB_MOUSE]	99.25	0.0608	1	3	4	4	757	86.6	6.4
Q61730	Interleukin-1 receptor accessory protein OS=Mus musculus GN=Il1rap PE=1 SV=1 - [IL1AP_MOUSE]	38.13	0.0123	1	1	1	1	570	65.7	7.77
P25085	Interleukin-1 receptor antagonist protein OS=Mus musculus GN=Il1rn PE=2 SV=1 - [IL1RA_MOUSE]	34.69	0.073	1	1	1	1	178	20.3	6.19
Q9Z1X4	Interleukin enhancer-binding factor 3 OS=Mus musculus GN=Ilf3 PE=1 SV=2 - [ILF3_MOUSE]	368.4	0.1314	2	10	10	30	898	96	8.76
Q8R0F6	Integrin-linked kinase-associated serine/threonine phosphatase 2C OS=Mus musculus GN=Ilkap PE=2 SV=1 - [ILKAP_MOUSE]	60.53	0.1097	1	3	3	3	392	42.7	7.36
O55222	Integrin-linked protein kinase OS=Mus musculus GN=Ilk PE=1 SV=2 - [ILK_MOUSE]	245.44	0.1637	1	7	7	17	452	51.3	8.07
Q8BU33	Acetolactate synthase-like protein OS=Mus musculus GN=Ilvbl PE=2 SV=1 - [ILVBL_MOUSE]	20.08	0.0269	1	1	1	1	632	68.1	8.69
P52293	Importin subunit alpha-1 OS=Mus musculus GN=Kpna2 PE=1 SV=2 - [IMA1_MOUSE]	396.06	0.2949	1	11	11	27	529	57.9	5.68
O35344	Importin subunit alpha-4 OS=Mus musculus GN=Kpna3 PE=1 SV=1 - [IMA4_MOUSE]	155.26	0.1459	1	3	5	8	521	57.7	4.94
O35343	Importin subunit alpha-3 OS=Mus musculus GN=Kpna4 PE=1 SV=1 - [IMA3_MOUSE]	230.49	0.215	1	5	7	13	521	57.9	4.94
O35345	Importin subunit alpha-7 OS=Mus musculus GN=Kpna6 PE=1 SV=2 - [IMA7_MOUSE]	67.39	0.0634	2	2	2	2	536	59.9	4.94
P70168	Importin subunit beta-1 OS=Mus musculus GN=Kpnb1 PE=1 SV=2 - [IMB1_MOUSE]	1033.88	0.3961	1	26	26	76	876	97.1	4.78
P50096	Inosine-5'-monophosphate dehydrogenase 1 OS=Mus musculus GN=Impdh1 PE=2 SV=2 - [IMDH1_MOUSE]	131.07	0.1304	1	4	6	8	514	55.2	6.8
P24547	Inosine-5'-monophosphate dehydrogenase 2 OS=Mus musculus GN=Impdh2 PE=1 SV=2 - [IMDH2_MOUSE]	633.63	0.4241	1	17	19	34	514	55.8	7.28
Q8CAQ8	Mitochondrial inner membrane protein OS=Mus musculus GN=Immt PE=1 SV=1 - [IMMT_MOUSE]	681.69	0.3659	1	27	27	44	757	83.8	6.61
Q9CQU8	Mitochondrial inner membrane protease subunit 1 OS=Mus musculus GN=Immp1l PE=2 SV=1 - [IMP1L_MOUSE]	23.69	0.0422	1	1	1	1	166	18.5	8.16
O55023	Inositol monophosphatase 1 OS=Mus musculus GN=Impa1 PE=1 SV=1 - [IMPA1_MOUSE]	250.31	0.2924	1	7	7	19	277	30.4	5.19
Q9D8C4	Interferon-induced 35 kDa protein homolog OS=Mus musculus GN=Ifi35 PE=2 SV=3 - [IN35_MOUSE]	97.33	0.1783	1	3	3	3	286	31.9	5.87
Q0GNC1	Inverted formin-2 OS=Mus musculus GN=Inf2 PE=1 SV=1 - [INF2_MOUSE]	47.33	0.033	1	3	3	3	1273	138.5	5.21
Q9JHU9	Inositol-3-phosphate synthase 1 OS=Mus musculus GN=Isyna1 PE=2 SV=1 - [INO1_MOUSE]	234.78	0.1364	1	8	8	23	557	60.9	6.42
P49442	Inositol polyphosphate 1-phosphatase OS=Mus musculus GN=Inpp1 PE=1 SV=2 - [INPP_MOUSE]	56.45	0.0631	1	2	2	3	396	43.3	5.01
Q80UK8	Integrator complex subunit 2 OS=Mus musculus GN=Ints2 PE=2 SV=2 - [INT2_MOUSE]	54.15	0.015	1	1	1	1	1198	133.4	6.11
Q8CIM8	Integrator complex subunit 4 OS=Mus musculus GN=Ints4 PE=2 SV=1 - [INT4_MOUSE]	38.18	0.0166	1	1	1	1	964	108.1	6.42
Q8CHT3	Integrator complex subunit 5 OS=Mus musculus GN=Ints5 PE=2 SV=1 - [INT5_MOUSE]	65.31	0.0196	1	2	2	2	1018	108.3	7.06
Q80V86	Integrator complex subunit 8 OS=Mus musculus GN=Ints8 PE=2 SV=1 - [INT8_MOUSE]	41.44	0.0221	1	1	1	1	995	113.3	6.96
P63248	cAMP-dependent protein kinase inhibitor alpha OS=Mus musculus GN=Pkia PE=1 SV=2 - [IPKA_MOUSE]	32.14	0.1974	1	1	1	1	76	8	4.54
O70139	cAMP-dependent protein kinase inhibitor gamma OS=Mus musculus GN=Pkig PE=1 SV=1 - [IPKG_MOUSE]	27.66	0.2105	1	1	1	1	76	7.9	4.21
Q8K2V6	Importin-11 OS=Mus musculus GN=Ipo11 PE=1 SV=1 - [IPO11_MOUSE]	79.76	0.039	1	2	2	4	975	112.3	5.26
Q8VI75	Importin-4 OS=Mus musculus GN=Ipo4 PE=1 SV=1 - [IPO4_MOUSE]	307.18	0.1137	1	9	9	13	1082	119.2	5.03
Q8BKC5	Importin-5 OS=Mus musculus GN=Ipo5 PE=1 SV=3 - [IPO5_MOUSE]	717.57	0.2078	1	18	18	44	1097	123.5	4.93
Q9EPL8	Importin-7 OS=Mus musculus GN=Ipo7 PE=1 SV=2 - [IPO7_MOUSE]	430.85	0.1493	1	10	11	19	1038	119.4	4.82
Q7TMY7	Importin-8 OS=Mus musculus GN=Ipo8 PE=1 SV=3 - [IPO8_MOUSE]	215.68	0.0693	1	5	6	8	1010	117	5.16
Q91YE6	Importin-9 OS=Mus musculus GN=Ipo9 PE=1 SV=3 - [IPO9_MOUSE]	459.95	0.171	1	13	13	23	1041	116	4.81
Q9DCL8	Protein phosphatase inhibitor 2 OS=Mus musculus GN=Ppp1r2 PE=1 SV=3 - [IPP2_MOUSE]	22.03	0.0534	1	1	1	3	206	23.1	4.83
Q91VM9	Inorganic pyrophosphatase 2, mitochondrial OS=Mus musculus GN=Ppa2 PE=1 SV=1 - [IPYR2_MOUSE]	79.97	0.1212	1	3	3	3	330	38.1	6.98
Q9D819	Inorganic pyrophosphatase OS=Mus musculus GN=Ppa1 PE=1 SV=1 - [IPYR_MOUSE]	258.05	0.4602	1	10	10	22	289	32.6	5.6
Q811J3	Iron-responsive element-binding protein 2 OS=Mus musculus GN=Ireb2 PE=2 SV=2 - [IREB2_MOUSE]	58.5	0.0395	1	2	3	4	963	104.9	6.93
Q60766	Immunity-related GTPase family M protein 1 OS=Mus musculus GN=Irgm1 PE=1 SV=1 - [IRGM1_MOUSE]	118.11	0.1663	1	5	5	11	409	46.5	8.28
Q8VIM9	Immunity-related GTPase family Q protein OS=Mus musculus GN=Irgq PE=2 SV=1 - [IRGQ_MOUSE]	107.88	0.0858	1	3	3	3	583	59.3	4.83
Q64339	Ubiquitin-like protein ISG15 OS=Mus musculus GN=Isg15 PE=1 SV=4 - [ISG15_MOUSE]	34.96	0.1118	1	1	1	2	161	17.9	7.9
Q9CX00	IST1 homolog OS=Mus musculus GN=Ist1 PE=2 SV=1 - [IST1_MOUSE]	163.87	0.1188	1	4	4	11	362	39.4	5.44
Q62470	Integrin alpha-3 OS=Mus musculus GN=Itga3 PE=1 SV=1 - [ITA3_MOUSE]	492.69	0.1586	1	13	13	38	1053	116.7	6.57
P11688	Integrin alpha-5 OS=Mus musculus GN=Itga5 PE=1 SV=3 - [ITA5_MOUSE]	86.39	0.0408	1	4	4	4	1053	115	5.95
P43406	Integrin alpha-V OS=Mus musculus GN=Itgav PE=1 SV=2 - [ITAV_MOUSE]	286.91	0.1188	1	11	11	16	1044	115.3	5.63
P09055	Integrin beta-1 OS=Mus musculus GN=Itgb1 PE=1 SV=1 - [ITB1_MOUSE]	638.05	0.2782	1	18	18	66	798	88.2	5.94
O54890	Integrin beta-3 OS=Mus musculus GN=Itgb3 PE=1 SV=2 - [ITB3_MOUSE]	28.96	0.0191	1	1	1	2	787	86.7	5.24
O70309	Integrin beta-5 OS=Mus musculus GN=Itgb5 PE=1 SV=2 - [ITB5_MOUSE]	55.31	0.0426	1	2	2	2	798	87.9	6.16
Q61703	Inter-alpha-trypsin inhibitor heavy chain H2 OS=Mus musculus GN=Itih2 PE=1 SV=1 - [ITIH2_MOUSE]	69.66	0.037	1	3	3	3	946	105.9	7.27
Q9D892	Inosine triphosphate pyrophosphatase OS=Mus musculus GN=Itpa PE=1 SV=2 - [ITPA_MOUSE]	311.05	0.5152	1	6	6	16	198	21.9	5.87
Q9Z329	Inositol 1,4,5-trisphosphate receptor type 2 OS=Mus musculus GN=Itpr2 PE=1 SV=4 - [ITPR2_MOUSE]	16.49	0.0037	2	1	1	1	2701	307.3	6.44
P70227	Inositol 1,4,5-trisphosphate receptor type 3 OS=Mus musculus GN=Itpr3 PE=1 SV=3 - [ITPR3_MOUSE]	50.25	0.009	1	1	1	1	2670	304.1	6.54
Q9QXX0	Protein jagged-1 OS=Mus musculus GN=Jag1 PE=1 SV=1 - [JAG1_MOUSE]	38.82	0.0115	1	1	1	1	1218	134.1	6.25
Q5DTX6	Junctional protein associated with coronary artery disease OS=Mus musculus GN=Jcad PE=1 SV=2 - [JCAD_MOUSE]	30.74	0.0121	1	1	1	1	1320	144.7	6.52
Q58A65	C-Jun-amino-terminal kinase-interacting protein 4 OS=Mus musculus GN=Spag9 PE=1 SV=2 - [JIP4_MOUSE]	47.33	0.0242	1	2	2	2	1321	146.1	5.15
Q8BKS9	Pumilio domain-containing protein KIAA0020 OS=Mus musculus GN=Kiaa0020 PE=2 SV=2 - [K0020_MOUSE]	95.59	0.0526	1	2	2	2	647	72.8	9.66
Q80U49	Centrosomal protein of 170 kDa protein B OS=Mus musculus GN=Cep170b PE=1 SV=2 - [C170B_MOUSE]	59.43	0.0089	1	1	1	1	1574	170.7	6.87
Q5SW19	Clustered mitochondria protein homolog OS=Mus musculus GN=Cluh PE=2 SV=2 - [CLU_MOUSE]	184.56	0.0684	1	7	7	8	1315	148	6.02
Q3UHH1	Zinc finger SWIM domain-containing protein 8 OS=Mus musculus GN=Zswim8 PE=1 SV=1 - [ZSWM8_MOUSE]	59.73	0.0175	1	2	2	2	1832	196.9	6.84
Q148V7	LisH domain and HEAT repeat-containing protein KIAA1468 OS=Mus musculus GN=Kiaa1468 PE=1 SV=1 - [K1468_MOUSE]	20.07	0.0099	1	1	1	1	1216	134.5	5.34
Q8VDP4	Cell cycle and apoptosis regulator protein 2 OS=Mus musculus GN=Ccar2 PE=1 SV=2 - [CCAR2_MOUSE]	204.36	0.103	1	7	7	12	922	102.9	5.25
P02535	Keratin, type I cytoskeletal 10 OS=Mus musculus GN=Krt10 PE=1 SV=3 - [K1C10_MOUSE]	45.91	0.0211	1	1	1	3	570	57.7	5.11
P19001	Keratin, type I cytoskeletal 19 OS=Mus musculus GN=Krt19 PE=1 SV=1 - [K1C19_MOUSE]	32.08	0.0174	5	1	1	1	403	44.5	5.39
Q6IME9	Keratin, type II cytoskeletal 72 OS=Mus musculus GN=Krt72 PE=3 SV=1 - [K2C72_MOUSE]	10.68	0.0231	1	1	1	1	520	56.7	7.4
P47857	6-phosphofructokinase, muscle type OS=Mus musculus GN=Pfkm PE=1 SV=3 - [K6PF_MOUSE]	205.09	0.0949	1	3	6	8	780	85.2	8
P12382	6-phosphofructokinase, liver type OS=Mus musculus GN=Pfkl PE=1 SV=4 - [K6PL_MOUSE]	180.5	0.0936	1	3	6	9	780	85.3	7.17
Q9WUA3	6-phosphofructokinase type C OS=Mus musculus GN=Pfkp PE=1 SV=1 - [K6PP_MOUSE]	119.1	0.0714	1	2	4	4	784	85.4	7.11
Q9R0Y5	Adenylate kinase isoenzyme 1 OS=Mus musculus GN=Ak1 PE=1 SV=1 - [KAD1_MOUSE]	98.55	0.134	1	2	2	3	194	21.5	5.81
Q9WTP6	Adenylate kinase 2, mitochondrial OS=Mus musculus GN=Ak2 PE=1 SV=5 - [KAD2_MOUSE]	448.74	0.5481	1	10	10	41	239	26.5	7.39
Q9WTP7	GTP:AMP phosphotransferase AK3, mitochondrial OS=Mus musculus GN=Ak3 PE=1 SV=3 - [KAD3_MOUSE]	308.25	0.489	1	9	9	20	227	25.4	8.84
Q8VCP8	Adenylate kinase isoenzyme 6 OS=Mus musculus GN=Taf9 PE=2 SV=1 - [KAD6_MOUSE]	42.52	0.1337	1	2	2	2	172	19.9	4.74
Q8BX02	KN motif and ankyrin repeat domain-containing protein 2 OS=Mus musculus GN=Kank2 PE=1 SV=1 - [KANK2_MOUSE]	157.19	0.0842	1	5	5	6	843	90.2	5.55
Q9DBC7	cAMP-dependent protein kinase type I-alpha regulatory subunit OS=Mus musculus GN=Prkar1a PE=1 SV=3 - [KAP0_MOUSE]	421.72	0.3543	2	11	11	22	381	43.2	5.35
P12367	cAMP-dependent protein kinase type II-alpha regulatory subunit OS=Mus musculus GN=Prkar2a PE=1 SV=2 - [KAP2_MOUSE]	210.47	0.2993	1	6	9	11	401	45.4	4.89
P31324	cAMP-dependent protein kinase type II-beta regulatory subunit OS=Mus musculus GN=Prkar2b PE=1 SV=3 - [KAP3_MOUSE]	177.69	0.2043	1	3	6	8	416	46.1	4.98
P05132	cAMP-dependent protein kinase catalytic subunit alpha OS=Mus musculus GN=Prkaca PE=1 SV=3 - [KAPCA_MOUSE]	125.05	0.2564	1	3	6	11	351	40.5	8.79
P68181	cAMP-dependent protein kinase catalytic subunit beta OS=Mus musculus GN=Prkacb PE=1 SV=2 - [KAPCB_MOUSE]	106.71	0.1396	1	1	4	12	351	40.7	8.56
Q5SVQ0	Histone acetyltransferase KAT7 OS=Mus musculus GN=Kat7 PE=2 SV=1 - [KAT7_MOUSE]	111.49	0.0865	1	4	4	5	613	70.6	8.72
Q9DC28	Casein kinase I isoform delta OS=Mus musculus GN=Csnk1d PE=1 SV=2 - [KC1D_MOUSE]	101.11	0.1205	2	4	4	5	415	47.3	9.74
Q6WVG3	BTB/POZ domain-containing protein KCTD12 OS=Mus musculus GN=Kctd12 PE=1 SV=1 - [KCD12_MOUSE]	131.67	0.1254	1	3	3	5	327	35.9	5.81
Q80UY2	E3 ubiquitin-protein ligase KCMF1 OS=Mus musculus GN=Kcmf1 PE=2 SV=1 - [KCMF1_MOUSE]	75.81	0.0446	1	1	1	2	381	41.8	5.76
Q9DBP5	UMP-CMP kinase OS=Mus musculus GN=Cmpk1 PE=1 SV=1 - [KCY_MOUSE]	251.42	0.4592	1	7	7	15	196	22.2	5.83
Q9JHP7	KDEL motif-containing protein 1 OS=Mus musculus GN=Kdelc1 PE=1 SV=1 - [KDEL1_MOUSE]	141.23	0.1414	1	5	5	6	502	57.9	7.9
Q6ZQ88	Lysine-specific histone demethylase 1A OS=Mus musculus GN=Kdm1a PE=1 SV=2 - [KDM1A_MOUSE]	151.31	0.0914	1	6	6	9	853	92.8	6.52
P59997	Lysine-specific demethylase 2A OS=Mus musculus GN=Kdm2a PE=1 SV=2 - [KDM2A_MOUSE]	69.74	0.0207	1	2	2	2	1161	132.6	7.44
Q6PCM1	Lysine-specific demethylase 3A OS=Mus musculus GN=Kdm3a PE=1 SV=1 - [KDM3A_MOUSE]	11.12	0.0038	1	1	1	1	1323	147.8	7.74
Q9Z2X8	Kelch-like ECH-associated protein 1 OS=Mus musculus GN=Keap1 PE=1 SV=1 - [KEAP1_MOUSE]	38.69	0.0288	1	1	1	1	624	69.5	6.44
Q64520	Guanylate kinase OS=Mus musculus GN=Guk1 PE=1 SV=2 - [KGUA_MOUSE]	84.1	0.1111	1	2	2	5	198	21.9	6.55
Q60749	KH domain-containing, RNA-binding, signal transduction-associated protein 1 OS=Mus musculus GN=Khdrbs1 PE=1 SV=2 - [KHDR1_MOUSE]	131.22	0.1332	2	5	5	11	443	48.3	8.72
P97329	Kinesin-like protein KIF20A OS=Mus musculus GN=Kif20a PE=2 SV=1 - [KI20A_MOUSE]	50.8	0.0271	1	2	2	2	887	99.8	6.99
Q6P9P6	Kinesin-like protein KIF11 OS=Mus musculus GN=Kif11 PE=2 SV=1 - [KIF11_MOUSE]	49.94	0.02	1	2	2	3	1052	118	6
P28740	Kinesin-like protein KIF2A OS=Mus musculus GN=Kif2a PE=1 SV=2 - [KIF2A_MOUSE]	65.34	0.0369	1	3	3	3	705	79.7	6.73
P28741	Kinesin-like protein KIF3A OS=Mus musculus GN=Kif3a PE=1 SV=2 - [KIF3A_MOUSE]	60.28	0.0271	1	1	1	2	701	80.1	6.54
P70188	Kinesin-associated protein 3 OS=Mus musculus GN=Kifap3 PE=1 SV=1 - [KIFA3_MOUSE]	34.53	0.0404	1	2	2	2	793	91.2	5.11
Q9QWT9	Kinesin-like protein KIFC1 OS=Mus musculus GN=Kifc1 PE=1 SV=2 - [KIFC1_MOUSE]	62.12	0.0549	1	3	3	3	674	74.1	8.72
Q9R008	Mevalonate kinase OS=Mus musculus GN=Mvk PE=2 SV=1 - [KIME_MOUSE]	61.16	0.0861	1	2	2	2	395	41.9	6.68
Q61768	Kinesin-1 heavy chain OS=Mus musculus GN=Kif5b PE=1 SV=3 - [KINH_MOUSE]	497.8	0.2295	3	17	17	25	963	109.5	6.44
Q80W68	Kin of IRRE-like protein 1 OS=Mus musculus GN=Kirrel PE=1 SV=1 - [KIRR1_MOUSE]	204.99	0.0773	1	4	4	8	789	87.1	5.92
Q9CR64	Protein kish-A OS=Mus musculus GN=Tmem167a PE=2 SV=1 - [KISHA_MOUSE]	32.59	0.125	1	1	1	3	72	8.1	8.95
P04184	Thymidine kinase, cytosolic OS=Mus musculus GN=Tk1 PE=2 SV=3 - [KITH_MOUSE]	25.12	0.0773	1	1	1	1	233	25.8	8.59
O88447	Kinesin light chain 1 OS=Mus musculus GN=Klc1 PE=1 SV=3 - [KLC1_MOUSE]	20.8	0.0203	1	1	1	1	541	61.4	5.68
O88448	Kinesin light chain 2 OS=Mus musculus GN=Klc2 PE=1 SV=1 - [KLC2_MOUSE]	58.88	0.0367	1	1	2	2	599	66.6	7.21
Q9DBS5	Kinesin light chain 4 OS=Mus musculus GN=Klc4 PE=1 SV=1 - [KLC4_MOUSE]	116.39	0.0969	1	3	4	4	619	68.6	6.09
Q4G5Y1	Kelch domain-containing protein 2 OS=Mus musculus GN=Klhdc2 PE=2 SV=3 - [KLDC2_MOUSE]	23.72	0.032	1	1	1	1	406	45.9	6.61
Q921I2	Kelch domain-containing protein 4 OS=Mus musculus GN=Klhdc4 PE=2 SV=2 - [KLDC4_MOUSE]	106.08	0.0805	1	3	3	5	584	64.8	5.73
P20444	Protein kinase C alpha type OS=Mus musculus GN=Prkca PE=1 SV=3 - [KPCA_MOUSE]	66.74	0.0476	2	2	3	4	672	76.8	7.14
P28867	Protein kinase C delta type OS=Mus musculus GN=Prkcd PE=1 SV=3 - [KPCD_MOUSE]	329.55	0.1439	1	8	9	13	674	77.5	7.39
Q62074	Protein kinase C iota type OS=Mus musculus GN=Prkci PE=1 SV=3 - [KPCI_MOUSE]	117.56	0.0824	1	3	3	6	595	68.2	5.85
Q9D0M1	Phosphoribosyl pyrophosphate synthase-associated protein 1 OS=Mus musculus GN=Prpsap1 PE=1 SV=1 - [KPRA_MOUSE]	227.08	0.2135	1	5	6	9	356	39.4	7.2
Q8R574	Phosphoribosyl pyrophosphate synthase-associated protein 2 OS=Mus musculus GN=Prpsap2 PE=1 SV=1 - [KPRB_MOUSE]	155.89	0.2033	1	4	5	6	369	40.9	7.17
P52480	Pyruvate kinase PKM OS=Mus musculus GN=Pkm PE=1 SV=4 - [KPYM_MOUSE]	1648.43	0.7137	1	34	36	319	531	57.8	7.47
P53657	Pyruvate kinase PKLR OS=Mus musculus GN=Pklr PE=2 SV=1 - [KPYR_MOUSE]	102.87	0.0732	1	1	3	15	574	62.3	7.09
P18653	Ribosomal protein S6 kinase alpha-1 OS=Mus musculus GN=Rps6ka1 PE=1 SV=1 - [KS6A1_MOUSE]	88.76	0.0912	2	2	5	5	724	81.5	8.1
P18654	Ribosomal protein S6 kinase alpha-3 OS=Mus musculus GN=Rps6ka3 PE=1 SV=2 - [KS6A3_MOUSE]	118.52	0.1	2	3	6	6	740	83.6	6.89
P97930	Thymidylate kinase OS=Mus musculus GN=Dtymk PE=2 SV=2 - [KTHY_MOUSE]	41.34	0.0613	1	1	1	1	212	23.9	7.9
Q61595	Kinectin OS=Mus musculus GN=Ktn1 PE=2 SV=1 - [KTN1_MOUSE]	747.61	0.2223	1	20	21	34	1327	152.5	5.86
Q8C8H8	Kyphoscoliosis peptidase OS=Mus musculus GN=Ky PE=1 SV=1 - [KY_MOUSE]	24	0.0091	1	1	1	2	661	75	7.59
P11627	Neural cell adhesion molecule L1 OS=Mus musculus GN=L1cam PE=1 SV=1 - [L1CAM_MOUSE]	151.64	0.0429	1	3	3	5	1260	140.9	5.97
Q80Y17	Lethal(2) giant larvae protein homolog 1 OS=Mus musculus GN=Llgl1 PE=1 SV=1 - [L2GL1_MOUSE]	80.87	0.0367	1	3	3	3	1036	112.5	6.48
Q3TJ91	Lethal(2) giant larvae protein homolog 2 OS=Mus musculus GN=Llgl2 PE=1 SV=2 - [L2GL2_MOUSE]	114.06	0.0487	1	4	4	5	1027	114.3	7.46
Q91YP0	L-2-hydroxyglutarate dehydrogenase, mitochondrial OS=Mus musculus GN=L2hgdh PE=1 SV=1 - [L2HDH_MOUSE]	46.81	0.0496	1	2	2	2	464	50.9	8.29
Q99KR3	Beta-lactamase-like protein 2 OS=Mus musculus GN=Lactb2 PE=1 SV=1 - [LACB2_MOUSE]	24.04	0.0382	1	1	1	1	288	32.7	6.33
P57016	Ladinin-1 OS=Mus musculus GN=Lad1 PE=2 SV=1 - [LAD1_MOUSE]	258.15	0.178	1	10	10	15	528	58.8	9.73
Q61001	Laminin subunit alpha-5 OS=Mus musculus GN=Lama5 PE=1 SV=4 - [LAMA5_MOUSE]	80.75	0.0086	1	2	2	2	3718	403.8	6.73
P02469	Laminin subunit beta-1 OS=Mus musculus GN=Lamb1 PE=1 SV=3 - [LAMB1_MOUSE]	352.32	0.0834	1	12	12	22	1786	197	4.94
Q61292	Laminin subunit beta-2 OS=Mus musculus GN=Lamb2 PE=2 SV=2 - [LAMB2_MOUSE]	27.25	0.0056	1	1	1	1	1799	196.5	6.67
P02468	Laminin subunit gamma-1 OS=Mus musculus GN=Lamc1 PE=1 SV=2 - [LAMC1_MOUSE]	64.1	0.0361	1	4	4	4	1607	177.2	5.21
P11438	Lysosome-associated membrane glycoprotein 1 OS=Mus musculus GN=Lamp1 PE=1 SV=2 - [LAMP1_MOUSE]	192.97	0.1478	1	5	5	12	406	43.8	8.4
P17047	Lysosome-associated membrane glycoprotein 2 OS=Mus musculus GN=Lamp2 PE=2 SV=2 - [LAMP2_MOUSE]	151.3	0.0867	1	4	4	22	415	45.7	7.39
O89112	LanC-like protein 1 OS=Mus musculus GN=Lancl1 PE=1 SV=1 - [LANC1_MOUSE]	105.24	0.1228	1	3	3	3	399	45.3	7.77
Q9JJK2	LanC-like protein 2 OS=Mus musculus GN=Lancl2 PE=1 SV=1 - [LANC2_MOUSE]	115.43	0.1156	1	4	4	6	450	50.7	7.28
Q61033	Lamina-associated polypeptide 2, isoforms alpha/zeta OS=Mus musculus GN=Tmpo PE=1 SV=4 - [LAP2A_MOUSE]	752.46	0.4156	1	12	19	40	693	75.1	8.05
Q61029	Lamina-associated polypeptide 2, isoforms beta/delta/epsilon/gamma OS=Mus musculus GN=Tmpo PE=1 SV=4 - [LAP2B_MOUSE]	487.2	0.3584	1	3	10	25	452	50.3	9.45
Q6ZQ58	La-related protein 1 OS=Mus musculus GN=Larp1 PE=1 SV=2 - [LARP1_MOUSE]	170.85	0.0914	1	6	6	8	1072	121.1	8.79
Q8BWW4	La-related protein 4 OS=Mus musculus GN=Larp4 PE=2 SV=2 - [LARP4_MOUSE]	109.23	0.0487	1	3	3	7	719	79.7	6.39
Q05CL8	La-related protein 7 OS=Mus musculus GN=Larp7 PE=1 SV=2 - [LARP7_MOUSE]	153.99	0.114	1	5	5	8	570	64.8	9.54
A2BE28	Ribosomal biogenesis protein LAS1L OS=Mus musculus GN=Las1l PE=1 SV=1 - [LAS1L_MOUSE]	122.6	0.058	1	4	4	5	776	89.4	4.44
Q61792	LIM and SH3 domain protein 1 OS=Mus musculus GN=Lasp1 PE=1 SV=1 - [LASP1_MOUSE]	400.56	0.3916	1	12	12	47	263	30	7.05
Q9Z127	Large neutral amino acids transporter small subunit 1 OS=Mus musculus GN=Slc7a5 PE=1 SV=2 - [LAT1_MOUSE]	155.86	0.0762	1	3	3	9	512	55.8	7.9
P32067	Lupus La protein homolog OS=Mus musculus GN=Ssb PE=2 SV=1 - [LA_MOUSE]	635.91	0.4289	1	19	19	66	415	47.7	9.77
Q3U9G9	Lamin-B receptor OS=Mus musculus GN=Lbr PE=1 SV=2 - [LBR_MOUSE]	92.23	0.0591	1	4	4	5	626	71.4	9.36
Q7TNC4	Putative RNA-binding protein Luc7-like 2 OS=Mus musculus GN=Luc7l2 PE=1 SV=1 - [LC7L2_MOUSE]	373.6	0.3265	1	9	12	20	392	46.6	10.1
Q5SUF2	Luc7-like protein 3 OS=Mus musculus GN=Luc7l3 PE=1 SV=1 - [LC7L3_MOUSE]	159.78	0.1435	1	5	5	6	432	51.4	9.77
Q8C129	Leucyl-cystinyl aminopeptidase OS=Mus musculus GN=Lnpep PE=1 SV=1 - [LCAP_MOUSE]	116.37	0.039	2	3	4	10	1025	117.2	5.96
P06151	L-lactate dehydrogenase A chain OS=Mus musculus GN=Ldha PE=1 SV=3 - [LDHA_MOUSE]	823.98	0.5873	1	19	21	112	332	36.5	7.74
P16125	L-lactate dehydrogenase B chain OS=Mus musculus GN=Ldhb PE=1 SV=2 - [LDHB_MOUSE]	881.15	0.6766	1	17	18	97	334	36.5	6.05
P00342	L-lactate dehydrogenase C chain OS=Mus musculus GN=Ldhc PE=1 SV=2 - [LDHC_MOUSE]	171.92	0.1145	1	1	3	16	332	35.9	8.21
P16045	Galectin-1 OS=Mus musculus GN=Lgals1 PE=1 SV=3 - [LEG1_MOUSE]	453.47	0.9407	1	12	12	104	135	14.9	5.49
P16110	Galectin-3 OS=Mus musculus GN=Lgals3 PE=1 SV=3 - [LEG3_MOUSE]	109.34	0.1705	1	4	4	14	264	27.5	8.38
O08573	Galectin-9 OS=Mus musculus GN=Lgals9 PE=1 SV=1 - [LEG9_MOUSE]	191.81	0.1671	1	4	4	6	353	40	9.31
Q8VED9	Galectin-related protein OS=Mus musculus GN=Lgalsl PE=2 SV=1 - [LEGL_MOUSE]	46.05	0.1395	1	2	2	2	172	18.9	5.35
Q5XJE5	RNA polymerase-associated protein LEO1 OS=Mus musculus GN=Leo1 PE=1 SV=2 - [LEO1_MOUSE]	24.12	0.018	1	1	1	1	667	75.6	4.46
Q9Z2I0	LETM1 and EF-hand domain-containing protein 1, mitochondrial OS=Mus musculus GN=Letm1 PE=2 SV=1 - [LETM1_MOUSE]	48.5	0.0393	1	2	2	3	738	82.9	6.52
Q91YX5	Acyl-CoA:lysophosphatidylglycerol acyltransferase 1 OS=Mus musculus GN=Lpgat1 PE=2 SV=1 - [LGAT1_MOUSE]	23.68	0.0378	1	1	1	1	370	43.1	8.79
O89017	Legumain OS=Mus musculus GN=Lgmn PE=1 SV=1 - [LGMN_MOUSE]	174.02	0.1425	1	6	6	10	435	49.3	6.39
Q9CPU0	Lactoylglutathione lyase OS=Mus musculus GN=Glo1 PE=1 SV=3 - [LGUL_MOUSE]	303.51	0.462	1	9	9	34	184	20.8	5.47
Q9ERG0	LIM domain and actin-binding protein 1 OS=Mus musculus GN=Lima1 PE=1 SV=3 - [LIMA1_MOUSE]	559.92	0.2829	1	18	18	37	753	84	6.6
Q99JW4	LIM and senescent cell antigen-like-containing domain protein 1 OS=Mus musculus GN=Lims1 PE=1 SV=3 - [LIMS1_MOUSE]	25.87	0.0338	2	1	1	2	325	37.2	8.05
Q8BSS9	Liprin-alpha-2 OS=Mus musculus GN=Ppfia2 PE=1 SV=2 - [LIPA2_MOUSE]	68.48	0.0263	3	2	3	3	1257	143.1	6.11
Q8C8U0	Liprin-beta-1 OS=Mus musculus GN=Ppfibp1 PE=1 SV=3 - [LIPB1_MOUSE]	210.58	0.1053	1	7	7	9	969	108.5	5.49
P63005	Platelet-activating factor acetylhydrolase IB subunit alpha OS=Mus musculus GN=Pafah1b1 PE=1 SV=2 - [LIS1_MOUSE]	215.76	0.2415	1	8	9	16	410	46.6	7.37
P24527	Leukotriene A-4 hydrolase OS=Mus musculus GN=Lta4h PE=1 SV=4 - [LKHA4_MOUSE]	648.95	0.3666	1	17	17	30	611	69	6.42
Q9D0F3	Protein ERGIC-53 OS=Mus musculus GN=Lman1 PE=2 SV=1 - [LMAN1_MOUSE]	95.4	0.0619	1	3	4	8	517	57.8	6.34
Q9DBH5	Vesicular integral-membrane protein VIP36 OS=Mus musculus GN=Lman2 PE=2 SV=2 - [LMAN2_MOUSE]	143.57	0.1536	1	5	5	10	358	40.4	6.95
Q8VEE1	LIM and cysteine-rich domains protein 1 OS=Mus musculus GN=Lmcd1 PE=1 SV=1 - [LMCD1_MOUSE]	32.2	0.0384	1	1	1	2	365	41	7.93
Q8C3X8	Lipase maturation factor 2 OS=Mus musculus GN=Lmf2 PE=2 SV=1 - [LMF2_MOUSE]	56.71	0.0256	1	1	1	2	702	79.9	9.99
P48678	Prelamin-A/C OS=Mus musculus GN=Lmna PE=1 SV=2 - [LMNA_MOUSE]	1870.11	0.6602	1	41	43	232	665	74.2	6.98
P14733	Lamin-B1 OS=Mus musculus GN=Lmnb1 PE=1 SV=3 - [LMNB1_MOUSE]	707.26	0.4558	1	22	26	66	588	66.7	5.16
P21619	Lamin-B2 OS=Mus musculus GN=Lmnb2 PE=1 SV=2 - [LMNB2_MOUSE]	299.43	0.2148	1	9	13	25	596	67.3	5.5
Q7TQ95	Protein lunapark OS=Mus musculus GN=Lnp PE=1 SV=1 - [LNP_MOUSE]	43.78	0.0894	1	2	2	2	425	47.5	5.27
Q8CGK3	Lon protease homolog, mitochondrial OS=Mus musculus GN=Lonp1 PE=1 SV=2 - [LONM_MOUSE]	299.55	0.1191	1	8	8	14	949	105.8	6.57
Q9DBN5	Lon protease homolog 2, peroxisomal OS=Mus musculus GN=Lonp2 PE=2 SV=1 - [LONP2_MOUSE]	37.24	0.0141	1	1	1	1	852	94.5	7.23
Q924C6	Lysyl oxidase homolog 4 OS=Mus musculus GN=Loxl4 PE=2 SV=2 - [LOXL4_MOUSE]	51.07	0.0159	1	1	1	1	757	84.7	7.99
Q6PB66	Leucine-rich PPR motif-containing protein, mitochondrial OS=Mus musculus GN=Lrpprc PE=1 SV=2 - [LPPRC_MOUSE]	919.55	0.2205	1	25	25	51	1392	156.5	6.83
Q8BFW7	Lipoma-preferred partner homolog OS=Mus musculus GN=Lpp PE=1 SV=1 - [LPP_MOUSE]	313.78	0.186	1	9	9	23	613	65.8	7.37
Q6EDY6	Leucine-rich repeat-containing protein 16A OS=Mus musculus GN=Lrrc16a PE=1 SV=2 - [LR16A_MOUSE]	53.67	0.0335	1	3	3	3	1374	151.8	7.8
Q9ESE1	Lipopolysaccharide-responsive and beige-like anchor protein OS=Mus musculus GN=Lrba PE=1 SV=1 - [LRBA_MOUSE]	31.53	0.0098	1	2	2	2	2856	316.9	5.69
Q9CRC8	Leucine-rich repeat-containing protein 40 OS=Mus musculus GN=Lrrc40 PE=2 SV=2 - [LRC40_MOUSE]	339.35	0.2292	1	10	10	14	602	68	6.89
Q3V0L5	Leucine-rich repeat-containing protein 43 OS=Mus musculus GN=Lrrc43 PE=2 SV=1 - [LRC43_MOUSE]	23.94	0.012	1	1	1	1	667	74.9	5.69
Q505F5	Leucine-rich repeat-containing protein 47 OS=Mus musculus GN=Lrrc47 PE=2 SV=1 - [LRC47_MOUSE]	210.6	0.1343	1	7	7	12	581	63.6	8.1
Q3UGP9	Leucine-rich repeat-containing protein 58 OS=Mus musculus GN=Lrrc58 PE=2 SV=1 - [LRC58_MOUSE]	98.94	0.082	1	2	2	3	366	40.1	6.62
Q922Q8	Leucine-rich repeat-containing protein 59 OS=Mus musculus GN=Lrrc59 PE=2 SV=1 - [LRC59_MOUSE]	200.29	0.3094	1	9	9	21	307	34.9	9.52
Q8R502	Leucine-rich repeat-containing protein 8C OS=Mus musculus GN=Lrrc8c PE=2 SV=1 - [LRC8C_MOUSE]	57.49	0.0374	2	2	2	2	803	92.3	7.81
Q8BVU0	Leucine-rich repeat and calponin homology domain-containing protein 3 OS=Mus musculus GN=Lrch3 PE=2 SV=3 - [LRCH3_MOUSE]	24.95	0.0206	1	1	1	1	778	86.3	7.03
A2ARV4	Low-density lipoprotein receptor-related protein 2 OS=Mus musculus GN=Lrp2 PE=1 SV=1 - [LRP2_MOUSE]	427.33	0.0504	1	19	19	24	4660	518.9	5.15
Q3UZ39	Leucine-rich repeat flightless-interacting protein 1 OS=Mus musculus GN=Lrrfip1 PE=1 SV=2 - [LRRF1_MOUSE]	207.63	0.1523	1	7	7	10	729	79.2	4.82
Q91WK0	Leucine-rich repeat flightless-interacting protein 2 OS=Mus musculus GN=Lrrfip2 PE=1 SV=1 - [LRRF2_MOUSE]	99.98	0.0867	1	3	3	4	415	47.1	5.68
Q8BUI3	Leucine-rich repeat and WD repeat-containing protein 1 OS=Mus musculus GN=LRWD1 PE=2 SV=1 - [LRWD1_MOUSE]	13.38	0.0201	1	1	1	1	648	71.5	7.87
Q8K2F8	Protein LSM14 homolog A OS=Mus musculus GN=Lsm14a PE=1 SV=1 - [LS14A_MOUSE]	35.67	0.039	1	1	2	2	462	50.5	9.52
Q8CGC4	Protein LSM14 homolog B OS=Mus musculus GN=Lsm14b PE=2 SV=3 - [LS14B_MOUSE]	83.94	0.0597	1	2	3	4	385	42.3	9.63
Q8VC85	U6 snRNA-associated Sm-like protein LSm1 OS=Mus musculus GN=Lsm1 PE=2 SV=1 - [LSM1_MOUSE]	128.14	0.3158	1	3	3	4	133	15.2	5.38
Q9QXA5	U6 snRNA-associated Sm-like protein LSm4 OS=Mus musculus GN=Lsm4 PE=2 SV=1 - [LSM4_MOUSE]	59.86	0.219	1	3	3	6	137	15.1	10.05
P62313	U6 snRNA-associated Sm-like protein LSm6 OS=Mus musculus GN=Lsm6 PE=2 SV=1 - [LSM6_MOUSE]	27.31	0.1	1	1	1	2	80	9.1	9.58
Q9CQQ8	U6 snRNA-associated Sm-like protein LSm7 OS=Mus musculus GN=Lsm7 PE=3 SV=1 - [LSM7_MOUSE]	86.62	0.5728	1	3	3	5	103	11.6	5.27
Q9D2U5	LSM domain-containing protein 1 OS=Mus musculus GN=Lsmd1 PE=2 SV=1 - [LSMD1_MOUSE]	26.29	0.072	1	1	1	2	125	13.4	5.5
Q6A009	E3 ubiquitin-protein ligase listerin OS=Mus musculus GN=Ltn1 PE=1 SV=3 - [LTN1_MOUSE]	21.97	0.0057	1	1	1	1	1767	198.8	6.55
Q9CQ22	Ragulator complex protein LAMTOR1 OS=Mus musculus GN=Lamtor1 PE=1 SV=1 - [LTOR1_MOUSE]	51.86	0.1615	1	2	2	3	161	17.7	5.15
Q9JHS3	Ragulator complex protein LAMTOR2 OS=Mus musculus GN=Lamtor2 PE=1 SV=1 - [LTOR2_MOUSE]	92.89	0.216	1	2	2	4	125	13.5	5.4
Q9CYI4	Putative RNA-binding protein Luc7-like 1 OS=Mus musculus GN=Luc7l PE=2 SV=2 - [LUC7L_MOUSE]	190.1	0.221	1	5	7	9	371	43.9	9.88
Q8R4U7	Leucine zipper protein 1 OS=Mus musculus GN=Luzp1 PE=1 SV=2 - [LUZP1_MOUSE]	58.87	0.0178	1	1	1	1	1068	119.2	7.99
P70202	Latexin OS=Mus musculus GN=Lxn PE=1 SV=2 - [LXN_MOUSE]	178.49	0.2027	1	4	4	11	222	25.5	5.74
Q60767	Lymphocyte antigen 75 OS=Mus musculus GN=Ly75 PE=1 SV=2 - [LY75_MOUSE]	118.54	0.0319	1	5	5	5	1723	197.2	6.39
P70699	Lysosomal alpha-glucosidase OS=Mus musculus GN=Gaa PE=1 SV=2 - [LYAG_MOUSE]	58.92	0.0325	1	2	2	2	953	106.2	5.83
Q08288	Cell growth-regulating nucleolar protein OS=Mus musculus GN=Lyar PE=1 SV=2 - [LYAR_MOUSE]	120.52	0.1366	1	4	4	6	388	43.7	9.5
P97823	Acyl-protein thioesterase 1 OS=Mus musculus GN=Lypla1 PE=1 SV=1 - [LYPA1_MOUSE]	199.75	0.3217	1	4	4	6	230	24.7	6.62
Q9WTL7	Acyl-protein thioesterase 2 OS=Mus musculus GN=Lypla2 PE=1 SV=1 - [LYPA2_MOUSE]	48.7	0.1472	1	2	2	4	231	24.8	7.23
Q80WJ7	Protein LYRIC OS=Mus musculus GN=Mtdh PE=1 SV=1 - [LYRIC_MOUSE]	175.52	0.0933	1	3	3	5	579	63.8	9.33
Q8K3C3	Protein LZIC OS=Mus musculus GN=Lzic PE=1 SV=1 - [LZIC_MOUSE]	92.73	0.2211	1	3	3	4	190	21.5	4.96
Q9CQ20	Mid1-interacting protein 1 OS=Mus musculus GN=Mid1ip1 PE=1 SV=1 - [M1IP1_MOUSE]	30.25	0.044	1	1	1	1	182	20.3	5.5
Q9CR62	Mitochondrial 2-oxoglutarate/malate carrier protein OS=Mus musculus GN=Slc25a11 PE=1 SV=3 - [M2OM_MOUSE]	168.59	0.2611	1	6	6	9	314	34.1	9.94
Q61083	Mitogen-activated protein kinase kinase kinase 2 OS=Mus musculus GN=Map3k2 PE=1 SV=2 - [M3K2_MOUSE]	15.46	0.0145	1	1	1	1	619	69.5	8.46
Q62073	Mitogen-activated protein kinase kinase kinase 7 OS=Mus musculus GN=Map3k7 PE=1 SV=1 - [M3K7_MOUSE]	71.59	0.019	1	1	1	1	579	64.2	6.67
P97820	Mitogen-activated protein kinase kinase kinase kinase 4 OS=Mus musculus GN=Map4k4 PE=1 SV=1 - [M4K4_MOUSE]	97.84	0.03	3	4	4	5	1233	140.5	7.47
Q8BPM2	Mitogen-activated protein kinase kinase kinase kinase 5 OS=Mus musculus GN=Map4k5 PE=1 SV=2 - [M4K5_MOUSE]	59.24	0.046	1	3	3	4	847	95	7.83
P39098	Mannosyl-oligosaccharide 1,2-alpha-mannosidase IB OS=Mus musculus GN=Man1a2 PE=2 SV=1 - [MA1A2_MOUSE]	75.25	0.0343	1	2	2	2	641	72.8	8.28
A2AJ15	Endoplasmic reticulum mannosyl-oligosaccharide 1,2-alpha-mannosidase OS=Mus musculus GN=Man1b1 PE=2 SV=1 - [MA1B1_MOUSE]	22.93	0.0198	1	1	1	2	658	75.1	8.48
P27046	Alpha-mannosidase 2 OS=Mus musculus GN=Man2a1 PE=1 SV=2 - [MA2A1_MOUSE]	33.63	0.0191	1	2	2	2	1150	131.5	8.03
O09159	Lysosomal alpha-mannosidase OS=Mus musculus GN=Man2b1 PE=2 SV=4 - [MA2B1_MOUSE]	83.51	0.0385	1	3	3	3	1013	114.6	8.13
A2AJI0	MAP7 domain-containing protein 1 OS=Mus musculus GN=Map7d1 PE=1 SV=1 - [MA7D1_MOUSE]	187.36	0.0875	1	6	6	7	846	93.2	10.15
Q9QXZ0	Microtubule-actin cross-linking factor 1 OS=Mus musculus GN=Macf1 PE=1 SV=2 - [MACF1_MOUSE]	182.3	0.0088	1	5	6	10	7354	831.4	5.43
O54791	Transcription factor MafF OS=Mus musculus GN=Maff PE=2 SV=1 - [MAFF_MOUSE]	34.43	0.0962	1	1	1	1	156	16.9	9.8
Q9CPR8	Melanoma-associated antigen G1 OS=Mus musculus GN=Ndnl2 PE=1 SV=1 - [MAGG1_MOUSE]	38.42	0.0394	1	1	1	1	279	31.4	9.07
Q9CQY5	Magnesium transporter protein 1 OS=Mus musculus GN=Magt1 PE=2 SV=1 - [MAGT1_MOUSE]	26.92	0.0299	1	1	1	1	335	37.9	9.76
Q8BGS0	Protein MAK16 homolog OS=Mus musculus GN=Mak16 PE=1 SV=1 - [MAK16_MOUSE]	55.53	0.1149	1	3	3	3	296	35.2	5.31
Q9CXI5	Mesencephalic astrocyte-derived neurotrophic factor OS=Mus musculus GN=Manf PE=1 SV=1 - [MANF_MOUSE]	157.98	0.3687	1	6	6	10	179	20.4	8.07
Q99KE1	NAD-dependent malic enzyme, mitochondrial OS=Mus musculus GN=Me2 PE=2 SV=1 - [MAOM_MOUSE]	149.77	0.107	1	4	4	7	589	65.8	7.61
P06801	NADP-dependent malic enzyme OS=Mus musculus GN=Me1 PE=1 SV=2 - [MAOX_MOUSE]	428.79	0.2552	1	10	10	22	572	63.9	7.44
P14873	Microtubule-associated protein 1B OS=Mus musculus GN=Map1b PE=1 SV=2 - [MAP1B_MOUSE]	907.18	0.1567	2	28	29	42	2464	270.1	4.83
Q8C052	Microtubule-associated protein 1S OS=Mus musculus GN=Map1s PE=1 SV=2 - [MAP1S_MOUSE]	219.39	0.1131	1	8	8	13	973	102.9	7.02
P27546	Microtubule-associated protein 4 OS=Mus musculus GN=Map4 PE=1 SV=3 - [MAP4_MOUSE]	606.13	0.2222	1	18	18	41	1125	117.4	4.98
P49138	MAP kinase-activated protein kinase 2 OS=Mus musculus GN=Mapkapk2 PE=1 SV=2 - [MAPK2_MOUSE]	87.4	0.0674	1	2	2	2	386	44	8.57
P26645	Myristoylated alanine-rich C-kinase substrate OS=Mus musculus GN=Marcks PE=1 SV=2 - [MARCS_MOUSE]	274.48	0.3107	1	7	7	19	309	29.6	4.34
Q61166	Microtubule-associated protein RP/EB family member 1 OS=Mus musculus GN=Mapre1 PE=1 SV=3 - [MARE1_MOUSE]	318.35	0.4104	1	8	10	29	268	30	5.22
Q8R001	Microtubule-associated protein RP/EB family member 2 OS=Mus musculus GN=Mapre2 PE=1 SV=1 - [MARE2_MOUSE]	48.55	0.0368	1	1	1	1	326	36.9	5.38
Q6PER3	Microtubule-associated protein RP/EB family member 3 OS=Mus musculus GN=Mapre3 PE=1 SV=1 - [MARE3_MOUSE]	69.69	0.0854	1	2	4	4	281	31.9	5.54
Q05512	Serine/threonine-protein kinase MARK2 OS=Mus musculus GN=Mark2 PE=1 SV=3 - [MARK2_MOUSE]	42.48	0.0219	1	2	2	3	776	86.3	9.67
Q9CWV0	Mitochondrial assembly of ribosomal large subunit protein 1 OS=Mus musculus GN=Malsu1 PE=2 SV=1 - [MASU1_MOUSE]	61.42	0.1009	1	2	2	2	228	26	6.73
P51949	CDK-activating kinase assembly factor MAT1 OS=Mus musculus GN=Mnat1 PE=2 SV=2 - [MAT1_MOUSE]	106.36	0.1165	1	2	2	3	309	35.8	5.82
Q99LB6	Methionine adenosyltransferase 2 subunit beta OS=Mus musculus GN=Mat2b PE=2 SV=1 - [MAT2B_MOUSE]	150.47	0.1347	1	5	5	7	334	37.4	6.95
Q8K310	Matrin-3 OS=Mus musculus GN=Matr3 PE=1 SV=1 - [MATR3_MOUSE]	551.79	0.221	1	15	15	32	846	94.6	6.25
Q8VCF0	Mitochondrial antiviral-signaling protein OS=Mus musculus GN=Mavs PE=1 SV=1 - [MAVS_MOUSE]	87.66	0.0676	1	3	3	3	503	53.4	6.37
Q7TPV4	Myb-binding protein 1A OS=Mus musculus GN=Mybbp1a PE=1 SV=2 - [MBB1A_MOUSE]	1439.32	0.3743	1	39	39	110	1344	151.9	8.95
Q9Z2D8	Methyl-CpG-binding domain protein 3 OS=Mus musculus GN=Mbd3 PE=1 SV=1 - [MBD3_MOUSE]	212.94	0.2561	1	6	6	13	285	32.1	5.82
Q99MR8	Methylcrotonoyl-CoA carboxylase subunit alpha, mitochondrial OS=Mus musculus GN=Mccc1 PE=1 SV=2 - [MCCA_MOUSE]	92.68	0.06	1	3	3	5	717	79.3	7.83
Q3ULD5	Methylcrotonoyl-CoA carboxylase beta chain, mitochondrial OS=Mus musculus GN=Mccc2 PE=1 SV=1 - [MCCB_MOUSE]	31.95	0.0231	1	1	1	3	563	61.3	8
O55236	mRNA-capping enzyme OS=Mus musculus GN=Rngtt PE=1 SV=1 - [MCE1_MOUSE]	26.08	0.0201	1	1	1	1	597	68.6	8.16
Q9D0L8	mRNA cap guanine-N7 methyltransferase OS=Mus musculus GN=Rnmt PE=1 SV=1 - [MCES_MOUSE]	115.27	0.114	1	5	5	6	465	53.3	6.48
P97287	Induced myeloid leukemia cell differentiation protein Mcl-1 homolog OS=Mus musculus GN=Mcl1 PE=1 SV=3 - [MCL1_MOUSE]	33.07	0.0634	1	1	1	1	331	35.2	6.2
P97310	DNA replication licensing factor MCM2 OS=Mus musculus GN=Mcm2 PE=1 SV=3 - [MCM2_MOUSE]	947.42	0.3982	1	26	26	58	904	102	5.72
P25206	DNA replication licensing factor MCM3 OS=Mus musculus GN=Mcm3 PE=1 SV=2 - [MCM3_MOUSE]	814.03	0.3448	1	21	21	41	812	91.5	5.55
P49717	DNA replication licensing factor MCM4 OS=Mus musculus GN=Mcm4 PE=2 SV=1 - [MCM4_MOUSE]	852.7	0.3213	1	22	22	52	862	96.7	7.2
P49718	DNA replication licensing factor MCM5 OS=Mus musculus GN=Mcm5 PE=2 SV=1 - [MCM5_MOUSE]	546.1	0.2647	1	17	17	29	733	82.3	8.43
P97311	DNA replication licensing factor MCM6 OS=Mus musculus GN=Mcm6 PE=1 SV=1 - [MCM6_MOUSE]	882.69	0.419	1	29	29	62	821	92.8	5.45
Q61881	DNA replication licensing factor MCM7 OS=Mus musculus GN=Mcm7 PE=1 SV=1 - [MCM7_MOUSE]	767.55	0.3964	1	21	21	52	719	81.2	6.37
Q9DB27	Malignant T-cell-amplified sequence 1 OS=Mus musculus GN=Mcts1 PE=2 SV=1 - [MCTS1_MOUSE]	94.97	0.1989	2	2	2	2	181	20.5	8.82
Q3UMR5	Calcium uniporter protein, mitochondrial OS=Mus musculus GN=Mcu PE=1 SV=2 - [MCU_MOUSE]	83.63	0.1029	1	3	3	4	350	39.7	8.56
Q9WTX8	Mitotic spindle assembly checkpoint protein MAD1 OS=Mus musculus GN=Mad1l1 PE=2 SV=1 - [MD1L1_MOUSE]	90.76	0.0628	1	4	4	5	717	83.5	5.66
Q9Z1B5	Mitotic spindle assembly checkpoint protein MAD2A OS=Mus musculus GN=Mad2l1 PE=1 SV=2 - [MD2L1_MOUSE]	105.95	0.1659	1	3	3	6	205	23.6	5.2
Q5PSV9	Mediator of DNA damage checkpoint protein 1 OS=Mus musculus GN=Mdc1 PE=1 SV=1 - [MDC1_MOUSE]	59.06	0.0164	1	2	2	3	1707	184.6	5.19
P14152	Malate dehydrogenase, cytoplasmic OS=Mus musculus GN=Mdh1 PE=1 SV=3 - [MDHC_MOUSE]	319.42	0.2994	1	11	11	33	334	36.5	6.58
P08249	Malate dehydrogenase, mitochondrial OS=Mus musculus GN=Mdh2 PE=1 SV=3 - [MDHM_MOUSE]	970.39	0.6627	1	20	20	226	338	35.6	8.68
Q8VCD5	Mediator of RNA polymerase II transcription subunit 17 OS=Mus musculus GN=Med17 PE=1 SV=1 - [MED17_MOUSE]	94.15	0.0401	1	2	2	4	649	72.4	7.3
Q99K74	Mediator of RNA polymerase II transcription subunit 24 OS=Mus musculus GN=Med24 PE=1 SV=1 - [MED24_MOUSE]	68.17	0.0294	1	2	2	2	987	109.9	6.83
Q9DB91	Mediator of RNA polymerase II transcription subunit 29 OS=Mus musculus GN=Med29 PE=2 SV=1 - [MED29_MOUSE]	20.25	0.0603	1	1	1	1	199	21	6.29
Q9CQA5	Mediator of RNA polymerase II transcription subunit 4 OS=Mus musculus GN=Med4 PE=2 SV=1 - [MED4_MOUSE]	75.79	0.0963	1	2	2	2	270	29.8	5.05
Q80V70	Multiple epidermal growth factor-like domains protein 6 OS=Mus musculus GN=Megf6 PE=2 SV=3 - [MEGF6_MOUSE]	31.62	0.0102	1	1	1	1	1572	164.6	6.28
Q60954	Homeobox protein Meis1 OS=Mus musculus GN=Meis1 PE=1 SV=1 - [MEIS1_MOUSE]	20.54	0.0615	2	1	1	1	390	43	6.33
Q61846	Maternal embryonic leucine zipper kinase OS=Mus musculus GN=Melk PE=1 SV=2 - [MELK_MOUSE]	24.22	0.0264	1	1	1	1	643	72.7	8.72
Q91VH6	Protein MEMO1 OS=Mus musculus GN=Memo1 PE=1 SV=1 - [MEMO1_MOUSE]	100.95	0.1987	1	5	5	5	297	33.7	7.14
O88559	Menin OS=Mus musculus GN=Men1 PE=1 SV=2 - [MEN1_MOUSE]	45.91	0.0262	1	1	1	2	611	67.5	6.39
Q99J09	Methylosome protein 50 OS=Mus musculus GN=Wdr77 PE=1 SV=1 - [MEP50_MOUSE]	156.28	0.1374	1	4	4	6	342	36.9	5.27
Q9ERE7	LDLR chaperone MESD OS=Mus musculus GN=Mesdc2 PE=1 SV=1 - [MESD_MOUSE]	96.38	0.2991	1	5	5	7	224	25.2	6.34
Q9CQG2	Methyltransferase-like protein 16 OS=Mus musculus GN=Mettl16 PE=2 SV=1 - [MET16_MOUSE]	69.88	0.0452	1	2	2	3	553	62.3	7.36
Q3THS6	S-adenosylmethionine synthase isoform type-2 OS=Mus musculus GN=Mat2a PE=2 SV=2 - [METK2_MOUSE]	308.05	0.281	2	10	10	25	395	43.7	6.48
P16056	Hepatocyte growth factor receptor OS=Mus musculus GN=Met PE=1 SV=1 - [MET_MOUSE]	45.22	0.008	1	1	1	1	1379	153.5	7.05
Q9CQU1	Microfibrillar-associated protein 1 OS=Mus musculus GN=Mfap1 PE=1 SV=1 - [MFAP1_MOUSE]	167.64	0.0979	1	4	4	5	439	51.9	4.98
P21956	Lactadherin OS=Mus musculus GN=Mfge8 PE=1 SV=3 - [MFGM_MOUSE]	209.83	0.1274	1	5	5	13	463	51.2	6.52
Q811U4	Mitofusin-1 OS=Mus musculus GN=Mfn1 PE=1 SV=3 - [MFN1_MOUSE]	30.19	0.0189	1	1	1	1	741	83.7	6.51
P27808	Alpha-1,3-mannosyl-glycoprotein 2-beta-N-acetylglucosaminyltransferase OS=Mus musculus GN=Mgat1 PE=2 SV=1 - [MGAT1_MOUSE]	52.37	0.0313	1	1	1	1	447	51.7	8.9
Q9D967	Magnesium-dependent phosphatase 1 OS=Mus musculus GN=Mdp1 PE=1 SV=1 - [MGDP1_MOUSE]	35.04	0.1098	1	1	1	1	164	18.6	6.8
Q9CPU4	Microsomal glutathione S-transferase 3 OS=Mus musculus GN=Mgst3 PE=1 SV=1 - [MGST3_MOUSE]	49.79	0.085	1	1	1	1	153	16.9	9.5
Q8VDP3	Protein-methionine sulfoxide oxidase MICAL1 OS=Mus musculus GN=Mical1 PE=1 SV=1 - [MICA1_MOUSE]	99.27	0.0601	1	5	5	5	1048	116.7	6.05
Q8VCX5	Calcium uptake protein 1, mitochondrial OS=Mus musculus GN=Micu1 PE=1 SV=1 - [MICU1_MOUSE]	33.05	0.0314	1	1	1	1	477	54.3	8.59
Q9CWG8	NADH dehydrogenase [ubiquinone] complex I, assembly factor 7 OS=Mus musculus GN=Ndufaf7 PE=2 SV=4 - [NDUF7_MOUSE]	24.5	0.0344	1	1	1	1	436	48.4	6.95
P34884	Macrophage migration inhibitory factor OS=Mus musculus GN=Mif PE=1 SV=2 - [MIF_MOUSE]	110.76	0.1739	1	2	2	8	115	12.5	7.34
Q8BGT6	MICAL-like protein 1 OS=Mus musculus GN=Micall1 PE=1 SV=3 - [MILK1_MOUSE]	64.94	0.0448	1	2	3	3	870	94	6.68
Q59J78	Mimitin, mitochondrial OS=Mus musculus GN=Ndufaf2 PE=2 SV=1 - [MIMIT_MOUSE]	69.31	0.1726	1	2	2	3	168	19.6	8.25
Q9D187	Mitotic spindle-associated MMXD complex subunit MIP18 OS=Mus musculus GN=Fam96b PE=2 SV=1 - [MIP18_MOUSE]	31.23	0.1288	1	1	1	1	163	17.7	4.98
Q8BG51	Mitochondrial Rho GTPase 1 OS=Mus musculus GN=Rhot1 PE=2 SV=1 - [MIRO1_MOUSE]	90.57	0.065	1	3	4	4	631	72.2	6.49
Q8JZN7	Mitochondrial Rho GTPase 2 OS=Mus musculus GN=Rhot2 PE=2 SV=1 - [MIRO2_MOUSE]	76.48	0.0323	1	1	2	2	620	69	6
Q9CY25	Protein MIS12 homolog OS=Mus musculus GN=Mis12 PE=2 SV=1 - [MIS12_MOUSE]	26.41	0.068	1	1	1	1	206	24.1	4.98
P63085	Mitogen-activated protein kinase 1 OS=Mus musculus GN=Mapk1 PE=1 SV=3 - [MK01_MOUSE]	244.64	0.324	2	6	9	18	358	41.2	6.98
Q63844	Mitogen-activated protein kinase 3 OS=Mus musculus GN=Mapk3 PE=1 SV=5 - [MK03_MOUSE]	162.39	0.2395	2	4	7	10	380	43	6.61
P47811	Mitogen-activated protein kinase 14 OS=Mus musculus GN=Mapk14 PE=1 SV=3 - [MK14_MOUSE]	49.76	0.0639	1	2	2	3	360	41.3	5.88
Q6ZQI3	Malectin OS=Mus musculus GN=Mlec PE=2 SV=2 - [MLEC_MOUSE]	180.03	0.2268	1	6	6	9	291	32.3	6.05
Q99KX1	Myeloid leukemia factor 2 OS=Mus musculus GN=Mlf2 PE=1 SV=1 - [MLF2_MOUSE]	35.6	0.081	1	2	2	2	247	28	6.98
Q9D2Y4	Mixed lineage kinase domain-like protein OS=Mus musculus GN=Mlkl PE=1 SV=1 - [MLKL_MOUSE]	82.22	0.0784	1	3	3	4	472	54.3	8.25
Q9ESL4	Mitogen-activated protein kinase kinase kinase MLT OS=Mus musculus GN=Mltk PE=1 SV=1 - [MLTK_MOUSE]	182.95	0.0835	1	5	5	8	802	91.7	7.74
P33435	Collagenase 3 OS=Mus musculus GN=Mmp13 PE=1 SV=1 - [MMP13_MOUSE]	13.14	0.0318	1	1	1	1	472	54.1	5.34
Q9D071	MMS19 nucleotide excision repair protein homolog OS=Mus musculus GN=Mms19 PE=2 SV=1 - [MMS19_MOUSE]	100.27	0.0291	1	2	2	3	1031	113	6.21
Q9EQ20	Methylmalonate-semialdehyde dehydrogenase [acylating], mitochondrial OS=Mus musculus GN=Aldh6a1 PE=1 SV=1 - [MMSA_MOUSE]	68.91	0.0636	1	3	3	4	535	57.9	8.07
D0QMC3	Myeloid cell nuclear differentiation antigen-like protein OS=Mus musculus GN=Mndal PE=1 SV=1 - [MNDAL_MOUSE]	53.7	0.0669	1	2	4	5	538	60.5	9.28
A2BDX3	Adenylyltransferase and sulfurtransferase MOCS3 OS=Mus musculus GN=Mocs3 PE=2 SV=1 - [MOCS3_MOUSE]	84.51	0.0739	1	2	3	7	460	49.3	7.49
P26041	Moesin OS=Mus musculus GN=Msn PE=1 SV=3 - [MOES_MOUSE]	1773.13	0.6551	1	35	47	211	577	67.7	6.6
Q80UM7	Mannosyl-oligosaccharide glucosidase OS=Mus musculus GN=Mogs PE=2 SV=1 - [MOGS_MOUSE]	52.55	0.0288	1	2	2	2	834	91.8	9
Q80TL7	Protein MON2 homolog OS=Mus musculus GN=Mon2 PE=2 SV=2 - [MON2_MOUSE]	73.73	0.014	1	2	2	2	1715	189	6.13
Q922Q1	MOSC domain-containing protein 2, mitochondrial OS=Mus musculus GN=Marc2 PE=1 SV=1 - [MOSC2_MOUSE]	119.84	0.1154	1	5	5	7	338	38.2	8.68
P53986	Monocarboxylate transporter 1 OS=Mus musculus GN=Slc16a1 PE=1 SV=1 - [MOT1_MOUSE]	49.75	0.0264	1	1	1	1	493	53.2	7.47
P23249	Putative helicase MOV-10 OS=Mus musculus GN=Mov10 PE=1 SV=2 - [MOV10_MOUSE]	532.08	0.2201	1	16	16	30	1004	113.5	9.01
O09110	Dual specificity mitogen-activated protein kinase kinase 3 OS=Mus musculus GN=Map2k3 PE=1 SV=2 - [MP2K3_MOUSE]	24.29	0.049	1	1	1	1	347	39.3	7.43
P47809	Dual specificity mitogen-activated protein kinase kinase 4 OS=Mus musculus GN=Map2k4 PE=1 SV=2 - [MP2K4_MOUSE]	22.02	0.0403	1	1	1	1	397	44.1	8.07
Q8VEM8	Phosphate carrier protein, mitochondrial OS=Mus musculus GN=Slc25a3 PE=1 SV=1 - [MPCP_MOUSE]	263.47	0.2633	1	9	9	19	357	39.6	9.26
Q8VBX6	Multiple PDZ domain protein OS=Mus musculus GN=Mpdz PE=1 SV=2 - [MPDZ_MOUSE]	32.75	0.0097	1	1	1	1	2055	218.6	5.02
Q924M7	Mannose-6-phosphate isomerase OS=Mus musculus GN=Mpi PE=2 SV=1 - [MPI_MOUSE]	60.48	0.0709	1	2	2	2	423	46.5	5.95
Q9JLB0	MAGUK p55 subfamily member 6 OS=Mus musculus GN=Mpp6 PE=1 SV=1 - [MPP6_MOUSE]	34.44	0.0217	1	1	1	1	553	62.6	6.4
Q9DC61	Mitochondrial-processing peptidase subunit alpha OS=Mus musculus GN=Pmpca PE=1 SV=1 - [MPPA_MOUSE]	208.36	0.1469	1	6	6	19	524	58.2	6.83
Q9CXT8	Mitochondrial-processing peptidase subunit beta OS=Mus musculus GN=Pmpcb PE=2 SV=1 - [MPPB_MOUSE]	152.52	0.1472	1	6	6	11	489	54.6	6.99
P24668	Cation-dependent mannose-6-phosphate receptor OS=Mus musculus GN=M6pr PE=1 SV=1 - [MPRD_MOUSE]	163.11	0.223	1	4	4	7	278	31.2	5.39
P97434	Myosin phosphatase Rho-interacting protein OS=Mus musculus GN=Mprip PE=1 SV=2 - [MPRIP_MOUSE]	160.61	0.0791	1	6	6	6	1024	116.3	6.21
Q07113	Cation-independent mannose-6-phosphate receptor OS=Mus musculus GN=Igf2r PE=1 SV=1 - [MPRI_MOUSE]	14.95	0.0089	1	1	1	1	2483	273.6	5.71
P19258	Protein Mpv17 OS=Mus musculus GN=Mpv17 PE=2 SV=1 - [MPV17_MOUSE]	90.63	0.1761	1	2	2	2	176	19.7	9.44
Q7TT50	Serine/threonine-protein kinase MRCK beta OS=Mus musculus GN=Cdc42bpb PE=1 SV=2 - [MRCKB_MOUSE]	107.5	0.0274	2	4	4	4	1713	194.6	6.46
Q61216	Double-strand break repair protein MRE11A OS=Mus musculus GN=Mre11a PE=1 SV=1 - [MRE11_MOUSE]	41.34	0.0482	1	2	2	2	706	80.2	6.01
O35379	Multidrug resistance-associated protein 1 OS=Mus musculus GN=Abcc1 PE=1 SV=1 - [MRP1_MOUSE]	28.83	0.0105	1	1	1	1	1528	171.1	7.36
P28667	MARCKS-related protein OS=Mus musculus GN=Marcksl1 PE=1 SV=2 - [MRP_MOUSE]	253.27	0.56	1	6	6	20	200	20.2	4.61
Q9D0I8	mRNA turnover protein 4 homolog OS=Mus musculus GN=Mrto4 PE=2 SV=1 - [MRT4_MOUSE]	49.95	0.1004	1	2	2	3	239	27.5	8.54
P43247	DNA mismatch repair protein Msh2 OS=Mus musculus GN=Msh2 PE=2 SV=1 - [MSH2_MOUSE]	454.17	0.2214	1	14	14	25	935	104.1	5.96
P54276	DNA mismatch repair protein Msh6 OS=Mus musculus GN=Msh6 PE=1 SV=3 - [MSH6_MOUSE]	243.4	0.0795	1	8	8	15	1358	151	6.73
Q920Q6	RNA-binding protein Musashi homolog 2 OS=Mus musculus GN=Msi2 PE=1 SV=1 - [MSI2H_MOUSE]	215.69	0.2197	1	6	6	8	346	36.9	8.47
Q9D6Y7	Mitochondrial peptide methionine sulfoxide reductase OS=Mus musculus GN=Msra PE=1 SV=1 - [MSRA_MOUSE]	35.52	0.0472	1	1	1	1	233	26	8.41
Q8BU85	Methionine-R-sulfoxide reductase B3, mitochondrial OS=Mus musculus GN=Msrb3 PE=1 SV=2 - [MSRB3_MOUSE]	30.22	0.0474	1	1	1	1	253	26.8	7.99
Q99JT2	Serine/threonine-protein kinase MST4 OS=Mus musculus GN=Mst4 PE=2 SV=1 - [MST4_MOUSE]	125.84	0.125	2	1	4	8	416	46.6	5.24
Q2YDW2	Protein misato homolog 1 OS=Mus musculus GN=Msto1 PE=2 SV=1 - [MSTO1_MOUSE]	322.86	0.2158	1	10	10	14	556	61.2	6.49
P02802	Metallothionein-1 OS=Mus musculus GN=Mt1 PE=1 SV=1 - [MT1_MOUSE]	51.39	0.2131	1	2	2	5	61	6	7.96
P02798	Metallothionein-2 OS=Mus musculus GN=Mt2 PE=1 SV=2 - [MT2_MOUSE]	92.22	0.541	1	3	3	8	61	6.1	7.83
Q9R190	Metastasis-associated protein MTA2 OS=Mus musculus GN=Mta2 PE=1 SV=1 - [MTA2_MOUSE]	335.23	0.1916	1	11	11	16	668	75	9.67
Q8C3P7	N6-adenosine-methyltransferase 70 kDa subunit OS=Mus musculus GN=Mettl3 PE=2 SV=2 - [MTA70_MOUSE]	25.57	0.0362	1	1	1	1	580	64.6	6.49
Q9CQ65	S-methyl-5'-thioadenosine phosphorylase OS=Mus musculus GN=Mtap PE=2 SV=1 - [MTAP_MOUSE]	338.67	0.4205	1	9	9	27	283	31	7.14
Q791T5	Mitochondrial carrier homolog 1 OS=Mus musculus GN=Mtch1 PE=2 SV=1 - [MTCH1_MOUSE]	84.2	0.0591	1	3	3	3	389	41.5	9.32
Q791V5	Mitochondrial carrier homolog 2 OS=Mus musculus GN=Mtch2 PE=1 SV=1 - [MTCH2_MOUSE]	157.39	0.231	1	5	5	6	303	33.5	8.25
P18155	Bifunctional methylenetetrahydrofolate dehydrogenase/cyclohydrolase, mitochondrial OS=Mus musculus GN=Mthfd2 PE=1 SV=1 - [MTDC_MOUSE]	62.94	0.0457	1	1	1	2	350	37.8	8.88
Q9CQT1	Methylthioribose-1-phosphate isomerase OS=Mus musculus GN=Mri1 PE=2 SV=1 - [MTNA_MOUSE]	129.24	0.1274	1	2	2	4	369	39.4	5.91
Q9WVQ5	Methylthioribulose-1-phosphate dehydratase OS=Mus musculus GN=Apip PE=1 SV=1 - [MTNB_MOUSE]	96.48	0.1286	1	3	3	6	241	26.9	6.9
Q9JLN9	Serine/threonine-protein kinase mTOR OS=Mus musculus GN=Mtor PE=1 SV=2 - [MTOR_MOUSE]	75.67	0.0173	1	3	3	4	2549	288.6	7.17
P62774	Myotrophin OS=Mus musculus GN=Mtpn PE=1 SV=2 - [MTPN_MOUSE]	261.4	0.4831	1	5	5	10	118	12.9	5.52
Q9DBC3	Cap-specific mRNA (nucleoside-2'-O-)-methyltransferase 1 OS=Mus musculus GN=Cmtr1 PE=1 SV=1 - [CMTR1_MOUSE]	77.61	0.0609	1	4	4	5	837	95.6	7.27
P47802	Metaxin-1 OS=Mus musculus GN=Mtx1 PE=1 SV=1 - [MTX1_MOUSE]	259.25	0.2808	1	7	7	11	317	35.6	6.18
O88441	Metaxin-2 OS=Mus musculus GN=Mtx2 PE=1 SV=1 - [MTX2_MOUSE]	88.7	0.1559	1	2	2	5	263	29.7	5.63
Q8R2Y2	Cell surface glycoprotein MUC18 OS=Mus musculus GN=Mcam PE=1 SV=1 - [MUC18_MOUSE]	334.18	0.1728	1	7	7	20	648	71.5	5.83
P16332	Methylmalonyl-CoA mutase, mitochondrial OS=Mus musculus GN=Mut PE=1 SV=2 - [MUTA_MOUSE]	36.89	0.0134	1	1	1	1	748	82.8	6.89
Q99JF5	Diphosphomevalonate decarboxylase OS=Mus musculus GN=Mvd PE=1 SV=2 - [MVD1_MOUSE]	134.73	0.1047	1	4	4	5	401	44	6.3
Q9EQK5	Major vault protein OS=Mus musculus GN=Mvp PE=1 SV=4 - [MVP_MOUSE]	855.31	0.4228	1	25	25	44	861	95.9	5.59
Q9JMH9	Unconventional myosin-XVIIIa OS=Mus musculus GN=Myo18a PE=1 SV=2 - [MY18A_MOUSE]	611.76	0.1185	1	18	18	28	2050	232.6	6.28
O35682	Myeloid-associated differentiation marker OS=Mus musculus GN=Myadm PE=2 SV=2 - [MYADM_MOUSE]	109.91	0.1	1	2	2	9	320	35.3	8.31
Q8C854	Myelin expression factor 2 OS=Mus musculus GN=Myef2 PE=1 SV=1 - [MYEF2_MOUSE]	462.93	0.2707	1	15	15	26	591	63.3	8.87
Q9JK81	UPF0160 protein MYG1, mitochondrial OS=Mus musculus GN=Myg1 PE=2 SV=1 - [MYG1_MOUSE]	299.3	0.3026	1	8	8	14	380	42.7	7.02
Q61879	Myosin-10 OS=Mus musculus GN=Myh10 PE=1 SV=2 - [MYH10_MOUSE]	2997.59	0.4251	1	60	77	267	1976	228.9	5.54
Q8VDD5	Myosin-9 OS=Mus musculus GN=Myh9 PE=1 SV=4 - [MYH9_MOUSE]	5767.59	0.6056	2	115	132	857	1960	226.2	5.66
Q9CQ19	Myosin regulatory light polypeptide 9 OS=Mus musculus GN=Myl9 PE=1 SV=3 - [MYL9_MOUSE]	192.95	0.2791	1	1	5	15	172	19.8	4.92
P46735	Unconventional myosin-Ib OS=Mus musculus GN=Myo1b PE=2 SV=3 - [MYO1B_MOUSE]	118.02	0.0524	1	5	5	8	1107	128.5	9.26
Q9WTI7	Unconventional myosin-Ic OS=Mus musculus GN=Myo1c PE=1 SV=2 - [MYO1C_MOUSE]	815.63	0.2568	1	20	20	57	1063	121.9	9.35
E9Q634	Unconventional myosin-Ie OS=Mus musculus GN=Myo1e PE=1 SV=1 - [MYO1E_MOUSE]	69.39	0.0262	1	2	2	3	1107	126.7	9.07
Q64331	Unconventional myosin-VI OS=Mus musculus GN=Myo6 PE=1 SV=1 - [MYO6_MOUSE]	112.58	0.0292	1	2	2	4	1265	146.3	8.85
Q9QY06	Unconventional myosin-IXb OS=Mus musculus GN=Myo9b PE=1 SV=2 - [MYO9B_MOUSE]	130.02	0.0293	1	5	5	8	2114	238.7	8.63
Q69ZN7	Myoferlin OS=Mus musculus GN=Myof PE=1 SV=2 - [MYOF_MOUSE]	1680.96	0.3184	1	53	55	93	2048	233.2	6.16
Q3U898	Myeloma-overexpressed gene 2 protein homolog OS=Mus musculus GN=Myeov2 PE=2 SV=1 - [MYOV2_MOUSE]	47.77	0.3509	1	1	1	1	57	6.2	3.83
Q9DBR7	Protein phosphatase 1 regulatory subunit 12A OS=Mus musculus GN=Ppp1r12a PE=1 SV=2 - [MYPT1_MOUSE]	95.58	0.0369	1	3	3	3	1029	114.9	5.49
Q8BG95	Protein phosphatase 1 regulatory subunit 12B OS=Mus musculus GN=Ppp1r12b PE=1 SV=2 - [MYPT2_MOUSE]	26.81	0.0082	1	1	1	1	976	109	5.74
Q9CQ25	Mitotic-spindle organizing protein 2 OS=Mus musculus GN=Mzt2 PE=1 SV=1 - [MZT2_MOUSE]	43.32	0.1321	1	1	1	1	159	16.5	10.18
Q9CY45	N(6)-adenine-specific DNA methyltransferase 2 OS=Mus musculus GN=N6amt2 PE=2 SV=1 - [N6MT2_MOUSE]	38.63	0.0935	1	1	1	1	214	24.5	4.67
Q3UX61	N-alpha-acetyltransferase 11 OS=Mus musculus GN=Naa11 PE=2 SV=1 - [NAA11_MOUSE]	23.22	0.0321	2	1	1	1	218	24.7	5.63
Q80UM3	N-alpha-acetyltransferase 15, NatA auxiliary subunit OS=Mus musculus GN=Naa15 PE=1 SV=1 - [NAA15_MOUSE]	391.86	0.222	2	17	17	26	865	100.9	7.62
Q8BWZ3	N-alpha-acetyltransferase 25, NatB auxiliary subunit OS=Mus musculus GN=Naa25 PE=2 SV=1 - [NAA25_MOUSE]	153.49	0.0525	1	4	4	5	972	111.6	6.52
Q8CES0	N-alpha-acetyltransferase 30 OS=Mus musculus GN=Naa30 PE=1 SV=2 - [NAA30_MOUSE]	20.13	0.033	1	1	1	1	364	39.4	5.64
Q6PHQ8	N-alpha-acetyltransferase 35, NatC auxiliary subunit OS=Mus musculus GN=Naa35 PE=1 SV=1 - [NAA35_MOUSE]	27.82	0.0303	1	1	1	1	725	83.3	7.3
Q6PGB6	N-alpha-acetyltransferase 50 OS=Mus musculus GN=Naa50 PE=1 SV=1 - [NAA50_MOUSE]	101.09	0.355	1	6	6	8	169	19.4	8.81
Q60817	Nascent polypeptide-associated complex subunit alpha OS=Mus musculus GN=Naca PE=1 SV=1 - [NACA_MOUSE]	238.07	0.2558	2	4	4	36	215	23.4	4.56
Q7TSZ8	Nucleus accumbens-associated protein 1 OS=Mus musculus GN=Nacc1 PE=1 SV=1 - [NACC1_MOUSE]	43.12	0.0253	1	1	1	2	514	56.5	5.73
Q9DCM7	Nucleus accumbens-associated protein 2 OS=Mus musculus GN=Nacc2 PE=2 SV=1 - [NACC2_MOUSE]	39.52	0.0273	1	1	1	1	586	63.2	5.9
Q9QWR8	Alpha-N-acetylgalactosaminidase OS=Mus musculus GN=Naga PE=2 SV=2 - [NAGAB_MOUSE]	42.8	0.0337	1	1	1	1	415	47.2	6.44
Q8JZV7	Putative N-acetylglucosamine-6-phosphate deacetylase OS=Mus musculus GN=Amdhd2 PE=2 SV=1 - [NAGA_MOUSE]	53.11	0.0342	1	1	1	2	409	43.5	6.23
Q8C5H8	NAD kinase 2, mitochondrial OS=Mus musculus GN=Nadk2 PE=1 SV=2 - [NAKD2_MOUSE]	75.28	0.0885	1	3	3	3	452	50.8	8.07
Q8C6J9	NACHT, LRR and PYD domains-containing protein 4B OS=Mus musculus GN=Nlrp4b PE=2 SV=1 - [NAL4B_MOUSE]	34.09	0.0081	1	1	1	1	863	99.9	5.55
Q99KQ4	Nicotinamide phosphoribosyltransferase OS=Mus musculus GN=Nampt PE=1 SV=1 - [NAMPT_MOUSE]	170.5	0.169	1	6	6	7	491	55.4	7.15
Q9CPT3	N-acylneuraminate-9-phosphatase OS=Mus musculus GN=Nanp PE=1 SV=1 - [NANP_MOUSE]	56.34	0.0726	1	1	1	1	248	27.8	6.07
Q99MD9	Nuclear autoantigenic sperm protein OS=Mus musculus GN=Nasp PE=1 SV=2 - [NASP_MOUSE]	664.72	0.2768	1	18	18	42	773	83.9	4.37
Q8K224	N-acetyltransferase 10 OS=Mus musculus GN=Nat10 PE=2 SV=1 - [NAT10_MOUSE]	194.32	0.0781	1	5	5	7	1024	115.3	8.32
Q9DB73	NADH-cytochrome b5 reductase 1 OS=Mus musculus GN=Cyb5r1 PE=2 SV=1 - [NB5R1_MOUSE]	29.59	0.0525	1	1	1	1	305	34.1	8.87
Q9DCN2	NADH-cytochrome b5 reductase 3 OS=Mus musculus GN=Cyb5r3 PE=1 SV=3 - [NB5R3_MOUSE]	359.3	0.4551	1	9	9	43	301	34.1	8.38
Q9D6N5	Dr1-associated corepressor OS=Mus musculus GN=Drap1 PE=2 SV=3 - [NC2A_MOUSE]	107.86	0.1171	1	2	2	5	205	22.3	5.26
Q91WV0	Protein Dr1 OS=Mus musculus GN=Dr1 PE=2 SV=1 - [NC2B_MOUSE]	61.85	0.1193	1	2	2	5	176	19.4	4.75
P13595	Neural cell adhesion molecule 1 OS=Mus musculus GN=Ncam1 PE=1 SV=3 - [NCAM1_MOUSE]	69.45	0.0233	1	2	2	3	1115	119.4	4.83
Q3UYV9	Nuclear cap-binding protein subunit 1 OS=Mus musculus GN=Ncbp1 PE=1 SV=2 - [NCBP1_MOUSE]	92.47	0.0532	1	3	3	5	790	91.9	6.64
Q9Z0E0	Neurochondrin OS=Mus musculus GN=Ncdn PE=1 SV=1 - [NCDN_MOUSE]	27.26	0.0165	1	1	1	1	729	78.8	5.54
Q8BLF1	Neutral cholesterol ester hydrolase 1 OS=Mus musculus GN=Nceh1 PE=1 SV=1 - [NCEH1_MOUSE]	56.56	0.1078	1	2	2	4	408	45.7	7.05
P28660	Nck-associated protein 1 OS=Mus musculus GN=Nckap1 PE=1 SV=2 - [NCKP1_MOUSE]	129.01	0.0727	1	6	6	8	1128	128.7	6.62
Q8VCM8	Nicalin OS=Mus musculus GN=Ncln PE=2 SV=2 - [NCLN_MOUSE]	79.78	0.0782	1	3	3	3	563	62.9	6.49
Q91W39	Nuclear receptor coactivator 5 OS=Mus musculus GN=Ncoa5 PE=1 SV=1 - [NCOA5_MOUSE]	72.16	0.0415	1	2	2	4	579	65.3	9.82
Q9EQQ9	Bifunctional protein NCOAT OS=Mus musculus GN=Mgea5 PE=1 SV=2 - [NCOAT_MOUSE]	401.75	0.1485	1	12	12	20	916	103.1	4.92
Q9WU42	Nuclear receptor corepressor 2 OS=Mus musculus GN=Ncor2 PE=1 SV=3 - [NCOR2_MOUSE]	26.02	0.0044	1	1	1	1	2472	269.6	7.44
P37040	NADPH--cytochrome P450 reductase OS=Mus musculus GN=Por PE=1 SV=2 - [NCPR_MOUSE]	169.67	0.1372	1	6	6	11	678	77	5.53
Q9JHJ3	Lysosomal protein NCU-G1 OS=Mus musculus PE=1 SV=1 - [NCUG1_MOUSE]	88.35	0.1312	1	3	3	7	404	43.8	6.14
Q9CZA6	Nuclear distribution protein nudE homolog 1 OS=Mus musculus GN=Nde1 PE=1 SV=1 - [NDE1_MOUSE]	135.29	0.1424	1	3	4	4	344	38.5	5.34
Q9ERR1	Nuclear distribution protein nudE-like 1 OS=Mus musculus GN=Ndel1 PE=1 SV=2 - [NDEL1_MOUSE]	76.46	0.1217	1	2	3	3	345	38.3	5.24
P15532	Nucleoside diphosphate kinase A OS=Mus musculus GN=Nme1 PE=1 SV=1 - [NDKA_MOUSE]	423.32	0.75	1	6	11	106	152	17.2	7.37
Q01768	Nucleoside diphosphate kinase B OS=Mus musculus GN=Nme2 PE=1 SV=1 - [NDKB_MOUSE]	375.18	0.7961	1	6	11	98	152	17.4	7.5
Q62433	Protein NDRG1 OS=Mus musculus GN=Ndrg1 PE=1 SV=1 - [NDRG1_MOUSE]	192.89	0.132	1	4	4	10	394	43	6.1
Q9QYF9	Protein NDRG3 OS=Mus musculus GN=Ndrg3 PE=1 SV=1 - [NDRG3_MOUSE]	65.23	0.0587	1	1	1	1	375	41.5	5.25
Q62425	NADH dehydrogenase [ubiquinone] 1 alpha subcomplex subunit 4 OS=Mus musculus GN=Ndufa4 PE=1 SV=2 - [NDUA4_MOUSE]	109	0.378	1	3	3	13	82	9.3	9.52
Q9CPP6	NADH dehydrogenase [ubiquinone] 1 alpha subcomplex subunit 5 OS=Mus musculus GN=Ndufa5 PE=1 SV=3 - [NDUA5_MOUSE]	39.49	0.1724	1	1	1	3	116	13.4	8.1
Q9CQZ5	NADH dehydrogenase [ubiquinone] 1 alpha subcomplex subunit 6 OS=Mus musculus GN=Ndufa6 PE=1 SV=1 - [NDUA6_MOUSE]	45.25	0.1908	1	2	2	2	131	15.3	10.11
Q9DCJ5	NADH dehydrogenase [ubiquinone] 1 alpha subcomplex subunit 8 OS=Mus musculus GN=Ndufa8 PE=1 SV=3 - [NDUA8_MOUSE]	25.48	0.0988	1	1	1	1	172	20	8.46
Q9DC69	NADH dehydrogenase [ubiquinone] 1 alpha subcomplex subunit 9, mitochondrial OS=Mus musculus GN=Ndufa9 PE=1 SV=2 - [NDUA9_MOUSE]	197.22	0.1538	1	4	4	6	377	42.5	9.74
Q99LC3	NADH dehydrogenase [ubiquinone] 1 alpha subcomplex subunit 10, mitochondrial OS=Mus musculus GN=Ndufa10 PE=1 SV=1 - [NDUAA_MOUSE]	105.03	0.1211	1	3	3	5	355	40.6	7.78
Q9ERS2	NADH dehydrogenase [ubiquinone] 1 alpha subcomplex subunit 13 OS=Mus musculus GN=Ndufa13 PE=1 SV=3 - [NDUAD_MOUSE]	93.09	0.2292	1	3	3	4	144	16.8	9.48
Q3UIU2	NADH dehydrogenase [ubiquinone] 1 beta subcomplex subunit 6 OS=Mus musculus GN=Ndufb6 PE=1 SV=3 - [NDUB6_MOUSE]	21.89	0.0547	1	1	1	1	128	15.5	9.79
Q9CR61	NADH dehydrogenase [ubiquinone] 1 beta subcomplex subunit 7 OS=Mus musculus GN=Ndufb7 PE=1 SV=3 - [NDUB7_MOUSE]	81.3	0.1168	1	1	1	2	137	16.3	8.18
Q9DCS9	NADH dehydrogenase [ubiquinone] 1 beta subcomplex subunit 10 OS=Mus musculus GN=Ndufb10 PE=1 SV=3 - [NDUBA_MOUSE]	99.49	0.2727	1	4	4	7	176	21	8.03
A2APY7	NADH dehydrogenase [ubiquinone] 1 alpha subcomplex assembly factor 5 OS=Mus musculus GN=Ndufaf5 PE=2 SV=1 - [NDUF5_MOUSE]	49.07	0.035	1	1	1	1	343	38.4	6.1
Q91VD9	NADH-ubiquinone oxidoreductase 75 kDa subunit, mitochondrial OS=Mus musculus GN=Ndufs1 PE=1 SV=2 - [NDUS1_MOUSE]	212.72	0.0867	1	4	4	8	727	79.7	5.72
Q91WD5	NADH dehydrogenase [ubiquinone] iron-sulfur protein 2, mitochondrial OS=Mus musculus GN=Ndufs2 PE=1 SV=1 - [NDUS2_MOUSE]	64.29	0.0605	1	2	2	2	463	52.6	6.99
Q9DCT2	NADH dehydrogenase [ubiquinone] iron-sulfur protein 3, mitochondrial OS=Mus musculus GN=Ndufs3 PE=1 SV=2 - [NDUS3_MOUSE]	108.92	0.1407	1	3	3	6	263	30.1	7.17
Q9CXZ1	NADH dehydrogenase [ubiquinone] iron-sulfur protein 4, mitochondrial OS=Mus musculus GN=Ndufs4 PE=1 SV=3 - [NDUS4_MOUSE]	33.49	0.0571	1	1	1	1	175	19.8	9.99
Q99LY9	NADH dehydrogenase [ubiquinone] iron-sulfur protein 5 OS=Mus musculus GN=Ndufs5 PE=1 SV=3 - [NDUS5_MOUSE]	31.65	0.1132	1	1	1	1	106	12.6	8.92
Q9DC70	NADH dehydrogenase [ubiquinone] iron-sulfur protein 7, mitochondrial OS=Mus musculus GN=Ndufs7 PE=1 SV=1 - [NDUS7_MOUSE]	55.95	0.0625	1	1	1	2	224	24.7	9.92
Q8K3J1	NADH dehydrogenase [ubiquinone] iron-sulfur protein 8, mitochondrial OS=Mus musculus GN=Ndufs8 PE=1 SV=1 - [NDUS8_MOUSE]	31.47	0.0425	1	1	1	3	212	24	6.21
Q91YT0	NADH dehydrogenase [ubiquinone] flavoprotein 1, mitochondrial OS=Mus musculus GN=Ndufv1 PE=1 SV=1 - [NDUV1_MOUSE]	124.32	0.1444	1	4	4	6	464	50.8	8.21
Q9D6J6	NADH dehydrogenase [ubiquinone] flavoprotein 2, mitochondrial OS=Mus musculus GN=Ndufv2 PE=1 SV=2 - [NDUV2_MOUSE]	87.58	0.129	1	3	3	5	248	27.3	7.4
Q8BK30	NADH dehydrogenase [ubiquinone] flavoprotein 3, mitochondrial OS=Mus musculus GN=Ndufv3 PE=2 SV=1 - [NDUV3_MOUSE]	31.31	0.0673	1	1	1	1	104	11.8	9.35
Q6R891	Neurabin-2 OS=Mus musculus GN=Ppp1r9b PE=1 SV=1 - [NEB2_MOUSE]	95	0.0869	1	4	5	6	817	89.5	4.92
Q9CR95	Adaptin ear-binding coat-associated protein 1 OS=Mus musculus GN=Necap1 PE=1 SV=2 - [NECP1_MOUSE]	98.61	0.1927	1	3	3	3	275	29.6	6.38
Q9D1J1	Adaptin ear-binding coat-associated protein 2 OS=Mus musculus GN=Necap2 PE=1 SV=1 - [NECP2_MOUSE]	109.66	0.2256	1	3	3	4	266	28.6	7.94
Q8CFI0	E3 ubiquitin-protein ligase NEDD4-like OS=Mus musculus GN=Nedd4l PE=1 SV=2 - [NED4L_MOUSE]	148.57	0.0618	1	2	6	12	1004	115.3	6.15
P29595	NEDD8 OS=Mus musculus GN=Nedd8 PE=1 SV=2 - [NEDD8_MOUSE]	137.42	0.4198	1	4	4	12	81	9	7.25
Q9ES74	Serine/threonine-protein kinase Nek7 OS=Mus musculus GN=Nek7 PE=2 SV=1 - [NEK7_MOUSE]	50.11	0.0861	1	2	2	3	302	34.5	8.25
Q8K1R7	Serine/threonine-protein kinase Nek9 OS=Mus musculus GN=Nek9 PE=1 SV=2 - [NEK9_MOUSE]	28.61	0.0152	1	1	1	1	984	107.1	5.63
Q8C4Y3	Negative elongation factor B OS=Mus musculus GN=Nelfb PE=1 SV=2 - [NELFB_MOUSE]	44.77	0.05	1	2	2	3	580	65.6	6.02
Q922L6	Negative elongation factor D OS=Mus musculus GN=Nelfcd PE=2 SV=2 - [NELFD_MOUSE]	12.35	0.022	1	1	1	1	591	66.2	5.16
P19426	Negative elongation factor E OS=Mus musculus GN=Nelfe PE=1 SV=2 - [NELFE_MOUSE]	113.73	0.1067	1	3	3	3	375	42.5	9.38
O88522	NF-kappa-B essential modulator OS=Mus musculus GN=Ikbkg PE=1 SV=2 - [NEMO_MOUSE]	106.84	0.1359	1	4	4	4	412	47.9	5.85
Q9CQ45	Neudesin OS=Mus musculus GN=Nenf PE=1 SV=1 - [NENF_MOUSE]	46.99	0.117	1	2	2	2	171	18.9	5.27
O35130	Ribosomal RNA small subunit methyltransferase NEP1 OS=Mus musculus GN=Emg1 PE=2 SV=1 - [NEP1_MOUSE]	144.46	0.1967	1	3	3	6	244	27	8.91
Q61391	Neprilysin OS=Mus musculus GN=Mme PE=1 SV=3 - [NEP_MOUSE]	55.24	0.0267	1	2	2	2	750	85.6	5.81
Q6P5H2	Nestin OS=Mus musculus GN=Nes PE=1 SV=1 - [NEST_MOUSE]	1829.55	0.3423	1	50	50	125	1864	207	4.34
Q9R1A3	Netrin-3 OS=Mus musculus GN=Ntn3 PE=2 SV=1 - [NET3_MOUSE]	21.65	0.0207	2	1	1	1	580	62	8.59
Q91YP2	Neurolysin, mitochondrial OS=Mus musculus GN=Nln PE=2 SV=1 - [NEUL_MOUSE]	197.1	0.0994	1	6	6	11	704	80.4	6.44
P97863	Nuclear factor 1 B-type OS=Mus musculus GN=Nfib PE=1 SV=2 - [NFIB_MOUSE]	23.84	0.0316	1	1	1	1	570	63.5	8.66
P25799	Nuclear factor NF-kappa-B p105 subunit OS=Mus musculus GN=Nfkb1 PE=1 SV=2 - [NFKB1_MOUSE]	44.81	0.0309	1	2	2	3	971	105.5	5.39
Q9WTK5	Nuclear factor NF-kappa-B p100 subunit OS=Mus musculus GN=Nfkb2 PE=1 SV=1 - [NFKB2_MOUSE]	289.84	0.1146	1	7	7	12	899	96.8	6.37
Q9QZ23	NFU1 iron-sulfur cluster scaffold homolog, mitochondrial OS=Mus musculus GN=Nfu1 PE=1 SV=2 - [NFU1_MOUSE]	100.93	0.1412	1	3	3	5	255	28.5	5.03
P70353	Nuclear transcription factor Y subunit gamma OS=Mus musculus GN=Nfyc PE=2 SV=2 - [NFYC_MOUSE]	25.91	0.0358	1	1	1	1	335	37.2	4.98
Q99KS2	Neugrin OS=Mus musculus GN=Ngrn PE=2 SV=3 - [NGRN_MOUSE]	21.28	0.0444	1	1	1	1	293	32.4	8.9
Q8BZW8	NHL repeat-containing protein 2 OS=Mus musculus GN=Nhlrc2 PE=2 SV=1 - [NHLC2_MOUSE]	63.09	0.0469	1	2	2	3	725	78.4	5.54
Q9CRB2	H/ACA ribonucleoprotein complex subunit 2 OS=Mus musculus GN=Nhp2 PE=2 SV=1 - [NHP2_MOUSE]	110.61	0.2353	1	3	3	8	153	17.2	8.41
P70441	Na(+)/H(+) exchange regulatory cofactor NHE-RF1 OS=Mus musculus GN=Slc9a3r1 PE=1 SV=3 - [NHRF1_MOUSE]	268.85	0.3183	1	7	7	16	355	38.6	5.9
Q9JHL1	Na(+)/H(+) exchange regulatory cofactor NHE-RF2 OS=Mus musculus GN=Slc9a3r2 PE=1 SV=2 - [NHRF2_MOUSE]	66.55	0.092	1	3	3	3	337	37.4	7.59
Q8R1F1	Niban-like protein 1 OS=Mus musculus GN=Fam129b PE=2 SV=2 - [NIBL1_MOUSE]	289.03	0.1549	1	9	9	19	749	84.8	5.94
P57716	Nicastrin OS=Mus musculus GN=Ncstn PE=1 SV=3 - [NICA_MOUSE]	206.42	0.1158	1	5	5	7	708	78.4	6.09
Q9EQ80	Putative GTP cyclohydrolase 1 type 2 Nif3l1 OS=Mus musculus GN=Nif3l1 PE=1 SV=4 - [GTPC1_MOUSE]	67.1	0.0346	1	1	1	1	376	41.7	6.76
Q6ZQ12	Ninein-like protein OS=Mus musculus GN=Ninl PE=2 SV=3 - [NINL_MOUSE]	13.14	0.005	1	1	1	1	1394	157.7	5.01
Q9CXK8	60S ribosome subunit biogenesis protein NIP7 homolog OS=Mus musculus GN=Nip7 PE=2 SV=1 - [NIP7_MOUSE]	34.12	0.1111	1	1	1	2	180	20.4	8.24
Q80YV2	Nuclear-interacting partner of ALK OS=Mus musculus GN=Zc3hc1 PE=1 SV=1 - [NIPA_MOUSE]	191.04	0.1377	1	5	5	5	501	55.2	5.38
Q6KCD5	Nipped-B-like protein OS=Mus musculus GN=Nipbl PE=1 SV=1 - [NIPBL_MOUSE]	45.71	0.0086	1	2	2	2	2798	315.3	7.91
O55125	Protein NipSnap homolog 1 OS=Mus musculus GN=Nipsnap1 PE=1 SV=1 - [NIPS1_MOUSE]	42.38	0.0493	1	1	1	1	284	33.3	9.44
O55126	Protein NipSnap homolog 2 OS=Mus musculus GN=Gbas PE=2 SV=1 - [NIPS2_MOUSE]	10.81	0.0285	1	1	1	1	281	32.9	9.26
Q80TM9	Nischarin OS=Mus musculus GN=Nisch PE=1 SV=2 - [NISCH_MOUSE]	339.32	0.1092	1	13	13	18	1593	174.9	5.16
Q8VDK1	Nitrilase homolog 1 OS=Mus musculus GN=Nit1 PE=2 SV=2 - [NIT1_MOUSE]	37.86	0.065	1	2	2	2	323	35.7	7.94
Q9JHW2	Omega-amidase NIT2 OS=Mus musculus GN=Nit2 PE=1 SV=1 - [NIT2_MOUSE]	105.38	0.163	1	3	3	6	276	30.5	6.9
P32020	Non-specific lipid-transfer protein OS=Mus musculus GN=Scp2 PE=1 SV=3 - [NLTP_MOUSE]	239.18	0.1079	1	7	7	11	547	59.1	7.44
Q99L48	60S ribosomal export protein NMD3 OS=Mus musculus GN=Nmd3 PE=2 SV=1 - [NMD3_MOUSE]	51.92	0.0338	1	1	1	2	503	57.6	7.17
Q99JR6	Nicotinamide mononucleotide adenylyltransferase 3 OS=Mus musculus GN=Nmnat3 PE=2 SV=1 - [NMNA3_MOUSE]	37.61	0.102	1	2	2	5	245	27.7	8.56
Q8K2T1	NmrA-like family domain-containing protein 1 OS=Mus musculus GN=Nmral1 PE=1 SV=1 - [NMRL1_MOUSE]	323.3	0.301	1	8	8	13	309	34.4	6.86
O70310	Glycylpeptide N-tetradecanoyltransferase 1 OS=Mus musculus GN=Nmt1 PE=1 SV=1 - [NMT1_MOUSE]	222.16	0.1331	1	4	6	10	496	56.9	8
O70311	Glycylpeptide N-tetradecanoyltransferase 2 OS=Mus musculus GN=Nmt2 PE=2 SV=1 - [NMT2_MOUSE]	209.27	0.1248	1	4	6	10	529	60.4	7.8
O55239	Nicotinamide N-methyltransferase OS=Mus musculus GN=Nnmt PE=1 SV=1 - [NNMT_MOUSE]	20.63	0.0833	1	1	1	1	264	29.6	5.39
Q8K4Z3	NAD(P)H-hydrate epimerase OS=Mus musculus GN=Apoa1bp PE=1 SV=1 - [NNRE_MOUSE]	86.52	0.1667	1	4	4	4	282	31	7.69
Q61941	NAD(P) transhydrogenase, mitochondrial OS=Mus musculus GN=Nnt PE=1 SV=2 - [NNTM_MOUSE]	474.16	0.1713	1	16	16	28	1086	113.8	7.64
Q9WV70	Nucleolar complex protein 2 homolog OS=Mus musculus GN=Noc2l PE=1 SV=2 - [NOC2L_MOUSE]	116.66	0.0562	1	3	3	4	747	85.4	5.97
Q8BHY2	Nucleolar complex protein 4 homolog OS=Mus musculus GN=Noc4l PE=2 SV=1 - [NOC4L_MOUSE]	30.62	0.0174	1	1	1	1	516	58.6	6.77
Q99ME9	Nucleolar GTP-binding protein 1 OS=Mus musculus GN=Gtpbp4 PE=2 SV=3 - [NOG1_MOUSE]	24.27	0.0142	1	1	1	1	634	74.1	9.52
Q99LH1	Nucleolar GTP-binding protein 2 OS=Mus musculus GN=Gnl2 PE=2 SV=2 - [NOG2_MOUSE]	33.75	0.0206	1	1	1	1	728	83.3	9.2
Q8BJW5	Nucleolar protein 11 OS=Mus musculus GN=Nol11 PE=2 SV=1 - [NOL11_MOUSE]	69.84	0.0526	1	3	3	3	723	80.8	5.92
Q9D7Z3	Nucleolar protein 7 OS=Mus musculus GN=Nol7 PE=1 SV=1 - [NOL7_MOUSE]	46.16	0.0787	1	1	1	2	254	29	9.61
Q6GQT9	Nodal modulator 1 OS=Mus musculus GN=Nomo1 PE=1 SV=1 - [NOMO1_MOUSE]	311.43	0.1096	1	9	9	12	1214	133.3	6.09
Q99K48	Non-POU domain-containing octamer-binding protein OS=Mus musculus GN=Nono PE=1 SV=3 - [NONO_MOUSE]	577.2	0.3911	1	14	16	68	473	54.5	8.95
Q8R3N1	Nucleolar protein 14 OS=Mus musculus GN=Nop14 PE=1 SV=2 - [NOP14_MOUSE]	88.99	0.0535	1	3	3	4	860	98.7	7.59
Q9CPT5	Nucleolar protein 16 OS=Mus musculus GN=Nop16 PE=2 SV=1 - [NOP16_MOUSE]	59.95	0.1292	1	2	2	3	178	21.1	9.91
Q922K7	Putative ribosomal RNA methyltransferase NOP2 OS=Mus musculus GN=Nop2 PE=2 SV=1 - [NOP2_MOUSE]	170.45	0.0807	1	6	6	8	793	86.7	9.22
Q9D6Z1	Nucleolar protein 56 OS=Mus musculus GN=Nop56 PE=1 SV=2 - [NOP56_MOUSE]	281.67	0.1603	1	7	7	17	580	64.4	9.14
Q6DFW4	Nucleolar protein 58 OS=Mus musculus GN=Nop58 PE=1 SV=1 - [NOP58_MOUSE]	337.82	0.2612	1	10	10	20	536	60.3	8.34
Q9D6T0	Nitric oxide synthase-interacting protein OS=Mus musculus GN=Nosip PE=2 SV=1 - [NOSIP_MOUSE]	37.8	0.0498	1	1	1	1	301	33.2	8.62
O35516	Neurogenic locus notch homolog protein 2 OS=Mus musculus GN=Notch2 PE=1 SV=1 - [NOTC2_MOUSE]	88.95	0.0162	1	3	3	5	2470	265.1	5.22
P28656	Nucleosome assembly protein 1-like 1 OS=Mus musculus GN=Nap1l1 PE=1 SV=2 - [NP1L1_MOUSE]	419.22	0.2916	1	7	8	36	391	45.3	4.46
Q78ZA7	Nucleosome assembly protein 1-like 4 OS=Mus musculus GN=Nap1l4 PE=1 SV=1 - [NP1L4_MOUSE]	369.2	0.3253	1	7	8	24	375	42.7	4.67
Q9Z0J0	Epididymal secretory protein E1 OS=Mus musculus GN=Npc2 PE=2 SV=1 - [NPC2_MOUSE]	175.07	0.3826	1	5	5	14	149	16.4	7.68
P60670	Nuclear protein localization protein 4 homolog OS=Mus musculus GN=Nploc4 PE=1 SV=3 - [NPL4_MOUSE]	187.98	0.1003	1	6	6	9	608	68	6.46
Q9CPP0	Nucleoplasmin-3 OS=Mus musculus GN=Npm3 PE=2 SV=3 - [NPM3_MOUSE]	151.07	0.3257	1	3	3	8	175	19	4.82
Q61937	Nucleophosmin OS=Mus musculus GN=Npm1 PE=1 SV=1 - [NPM_MOUSE]	570.44	0.4521	1	13	13	135	292	32.5	4.77
Q91V88	Nephronectin OS=Mus musculus GN=Npnt PE=1 SV=1 - [NPNT_MOUSE]	45.36	0.0428	1	2	2	2	561	61.4	8.35
Q9JI75	Ribosyldihydronicotinamide dehydrogenase [quinone] OS=Mus musculus GN=Nqo2 PE=2 SV=3 - [NQO2_MOUSE]	154.13	0.2424	1	4	4	9	231	26.2	7.01
Q3TV70	Nuclear receptor 2C2-associated protein OS=Mus musculus GN=Nr2c2ap PE=2 SV=1 - [NR2CA_MOUSE]	20.07	0.0857	1	1	1	1	140	15.8	5.26
Q8CJ26	Death domain-containing membrane protein NRADD OS=Mus musculus GN=Nradd PE=1 SV=1 - [NRADD_MOUSE]	210.97	0.2456	1	5	5	11	228	24.7	5.01
Q99J45	Nuclear receptor-binding protein OS=Mus musculus GN=Nrbp1 PE=1 SV=1 - [NRBP_MOUSE]	111.98	0.0804	1	3	3	10	535	59.8	5.08
Q8BHG1	Nardilysin OS=Mus musculus GN=Nrd1 PE=1 SV=1 - [NRDC_MOUSE]	178.87	0.0629	1	7	7	9	1161	132.8	4.87
P97333	Neuropilin-1 OS=Mus musculus GN=Nrp1 PE=1 SV=2 - [NRP1_MOUSE]	29.07	0.0173	1	1	1	1	923	102.9	5.9
Q9R1J0	Sterol-4-alpha-carboxylate 3-dehydrogenase, decarboxylating OS=Mus musculus GN=Nsdhl PE=2 SV=1 - [NSDHL_MOUSE]	85.79	0.1354	1	3	3	5	362	40.7	7.85
Q91VT1	E3 SUMO-protein ligase NSE2 OS=Mus musculus GN=Nsmce2 PE=2 SV=1 - [NSE2_MOUSE]	41.84	0.0607	1	1	1	2	247	28.2	8
Q9CZ44	NSFL1 cofactor p47 OS=Mus musculus GN=Nsfl1c PE=1 SV=1 - [NSF1C_MOUSE]	411.98	0.3649	1	9	9	26	370	40.7	5.15
P46460	Vesicle-fusing ATPase OS=Mus musculus GN=Nsf PE=1 SV=2 - [NSF_MOUSE]	92.82	0.0484	1	3	3	4	744	82.6	6.95
Q6ZPR5	Sphingomyelin phosphodiesterase 4 OS=Mus musculus GN=Smpd4 PE=2 SV=2 - [NSMA3_MOUSE]	32.57	0.0158	1	1	1	2	823	93.2	8.13
Q1HFZ0	tRNA (cytosine(34)-C(5))-methyltransferase OS=Mus musculus GN=Nsun2 PE=1 SV=2 - [NSUN2_MOUSE]	622.92	0.3765	1	22	22	37	757	85.4	6.58
Q9JM14	5'(3')-deoxyribonucleotidase, cytosolic type OS=Mus musculus GN=Nt5c PE=1 SV=1 - [NT5C_MOUSE]	197.89	0.405	1	5	5	8	200	23.1	5.49
Q8R2U4	N-terminal Xaa-Pro-Lys N-methyltransferase 1 OS=Mus musculus GN=Ntmt1 PE=2 SV=3 - [NTM1A_MOUSE]	267.85	0.3004	1	6	6	7	223	25.4	6.9
Q8BH74	Nuclear pore complex protein Nup107 OS=Mus musculus GN=Nup107 PE=2 SV=1 - [NU107_MOUSE]	265.06	0.0983	1	8	8	9	926	106.6	5.43
Q8R0G9	Nuclear pore complex protein Nup133 OS=Mus musculus GN=Nup133 PE=1 SV=2 - [NU133_MOUSE]	238.39	0.0866	1	6	6	9	1155	128.5	5.2
Q99P88	Nuclear pore complex protein Nup155 OS=Mus musculus GN=Nup155 PE=1 SV=1 - [NU155_MOUSE]	380.19	0.11	1	11	11	16	1391	155	6.15
Q9Z0W3	Nuclear pore complex protein Nup160 OS=Mus musculus GN=Nup160 PE=1 SV=2 - [NU160_MOUSE]	266.51	0.0656	1	7	7	9	1402	158.1	5.52
Q6ZQH8	Nucleoporin NUP188 homolog OS=Mus musculus GN=Nup188 PE=1 SV=2 - [NU188_MOUSE]	120.03	0.0244	1	3	3	3	1759	196.6	7.01
Q80U93	Nuclear pore complex protein Nup214 OS=Mus musculus GN=Nup214 PE=1 SV=2 - [NU214_MOUSE]	227.85	0.0571	1	8	8	9	2085	212.8	7.08
P03911	NADH-ubiquinone oxidoreductase chain 4 OS=Mus musculus GN=Mtnd4 PE=1 SV=1 - [NU4M_MOUSE]	77.17	0.0545	1	2	2	2	459	51.8	9.38
P03921	NADH-ubiquinone oxidoreductase chain 5 OS=Mus musculus GN=Mtnd5 PE=3 SV=2 - [NU5M_MOUSE]	63.48	0.0544	1	2	2	2	607	68.4	9.03
P54729	NEDD8 ultimate buster 1 OS=Mus musculus GN=Nub1 PE=1 SV=2 - [NUB1_MOUSE]	80.41	0.0603	1	3	4	5	614	70.3	5.88
Q9R060	Cytosolic Fe-S cluster assembly factor NUBP1 OS=Mus musculus GN=Nubp1 PE=1 SV=1 - [NUBP1_MOUSE]	106.42	0.1344	2	3	3	4	320	34.1	5.9
Q9R061	Cytosolic Fe-S cluster assembly factor NUBP2 OS=Mus musculus GN=Nubp2 PE=1 SV=1 - [NUBP2_MOUSE]	110.47	0.1091	1	2	2	7	275	29.5	6.52
Q02819	Nucleobindin-1 OS=Mus musculus GN=Nucb1 PE=1 SV=2 - [NUCB1_MOUSE]	408.54	0.3028	1	11	11	25	459	53.4	5.07
Q80XU3	Nuclear ubiquitous casein and cyclin-dependent kinase substrate 1 OS=Mus musculus GN=Nucks1 PE=1 SV=1 - [NUCKS_MOUSE]	33.03	0.0385	1	1	1	2	234	26.3	5.14
P09405	Nucleolin OS=Mus musculus GN=Ncl PE=1 SV=2 - [NUCL_MOUSE]	1400.21	0.4611	1	40	40	178	707	76.7	4.75
Q9DD16	Nucleoside diphosphate-linked moiety X motif 22 OS=Mus musculus GN=Nudt22 PE=2 SV=1 - [NUD22_MOUSE]	17.35	0.0325	1	1	1	1	308	33.4	5.57
Q6PIP5	NudC domain-containing protein 1 OS=Mus musculus GN=Nudcd1 PE=2 SV=2 - [NUDC1_MOUSE]	187.13	0.1237	1	5	5	7	582	66.7	5.3
Q9CQ48	NudC domain-containing protein 2 OS=Mus musculus GN=Nudcd2 PE=1 SV=1 - [NUDC2_MOUSE]	112.42	0.242	1	3	3	7	157	17.6	5.07
Q8R1N4	NudC domain-containing protein 3 OS=Mus musculus GN=Nudcd3 PE=2 SV=3 - [NUDC3_MOUSE]	193.91	0.2094	1	6	6	10	363	40.9	5.26
O35685	Nuclear migration protein nudC OS=Mus musculus GN=Nudc PE=1 SV=1 - [NUDC_MOUSE]	663.84	0.4849	1	18	18	42	332	38.3	5.26
Q9JI46	Diphosphoinositol polyphosphate phosphohydrolase 1 OS=Mus musculus GN=Nudt3 PE=1 SV=1 - [NUDT3_MOUSE]	38.12	0.0833	1	1	1	1	168	19	6.34
Q9JKX6	ADP-sugar pyrophosphatase OS=Mus musculus GN=Nudt5 PE=1 SV=1 - [NUDT5_MOUSE]	155.64	0.2385	1	4	4	8	218	24	5.48
Q5F2E7	Nuclear fragile X mental retardation-interacting protein 2 OS=Mus musculus GN=Nufip2 PE=1 SV=1 - [NUFP2_MOUSE]	100.99	0.0549	1	3	3	4	692	75.6	8.7
O08919	Numb-like protein OS=Mus musculus GN=Numbl PE=1 SV=3 - [NUMBL_MOUSE]	39.09	0.0099	2	1	1	1	604	64.1	8.82
Q9CWU9	Nucleoporin Nup37 OS=Mus musculus GN=Nup37 PE=2 SV=2 - [NUP37_MOUSE]	199.1	0.2699	1	7	7	7	326	36.7	6.09
Q9JIH2	Nuclear pore complex protein Nup50 OS=Mus musculus GN=Nup50 PE=1 SV=3 - [NUP50_MOUSE]	160.32	0.176	1	6	6	9	466	49.5	6.24
Q8R4R6	Nucleoporin NUP53 OS=Mus musculus GN=Nup35 PE=1 SV=2 - [NUP53_MOUSE]	136.09	0.1415	1	3	3	5	325	34.8	9.25
Q8BTS4	Nuclear pore complex protein Nup54 OS=Mus musculus GN=Nup54 PE=1 SV=1 - [NUP54_MOUSE]	213.1	0.1941	1	7	7	8	510	55.7	7.02
Q63850	Nuclear pore glycoprotein p62 OS=Mus musculus GN=Nup62 PE=1 SV=2 - [NUP62_MOUSE]	50.82	0.0589	1	2	2	2	526	53.2	5.31
Q8R480	Nuclear pore complex protein Nup85 OS=Mus musculus GN=Nup85 PE=1 SV=1 - [NUP85_MOUSE]	218.38	0.1189	1	5	6	11	656	74.7	5.57
Q8CEC0	Nuclear pore complex protein Nup88 OS=Mus musculus GN=Nup88 PE=1 SV=1 - [NUP88_MOUSE]	48.34	0.0266	1	2	2	3	753	84.9	6.27
Q8BJ71	Nuclear pore complex protein Nup93 OS=Mus musculus GN=Nup93 PE=2 SV=1 - [NUP93_MOUSE]	568.69	0.2808	1	20	20	36	819	93.2	5.72
Q8R332	Nucleoporin p58/p45 OS=Mus musculus GN=Nupl1 PE=1 SV=1 - [NUPL1_MOUSE]	68.31	0.0221	1	1	1	2	587	59.4	9.29
Q9DBY8	Nuclear valosin-containing protein-like OS=Mus musculus GN=Nvl PE=1 SV=1 - [NVL_MOUSE]	81.63	0.0398	1	3	3	5	855	94.4	6.35
Q99JX7	Nuclear RNA export factor 1 OS=Mus musculus GN=Nxf1 PE=1 SV=3 - [NXF1_MOUSE]	73.47	0.055	1	2	2	3	618	70.3	8.73
P97346	Nucleoredoxin OS=Mus musculus GN=Nxn PE=1 SV=1 - [NXN_MOUSE]	219.18	0.1632	1	5	5	12	435	48.3	4.93
Q9D281	Protein Noxp20 OS=Mus musculus GN=Fam114a1 PE=2 SV=1 - [NXP20_MOUSE]	34.02	0.0264	1	1	1	1	569	61	4.56
P29758	Ornithine aminotransferase, mitochondrial OS=Mus musculus GN=Oat PE=1 SV=1 - [OAT_MOUSE]	635.13	0.4374	1	15	15	40	439	48.3	6.62
Q9D8W7	OCIA domain-containing protein 2 OS=Mus musculus GN=Ociad2 PE=1 SV=1 - [OCAD2_MOUSE]	42.7	0.0844	1	1	1	1	154	16.9	9.41
Q9DC50	Peroxisomal carnitine O-octanoyltransferase OS=Mus musculus GN=Crot PE=1 SV=1 - [OCTC_MOUSE]	231.51	0.1471	1	5	6	10	612	70.2	6.73
P50136	2-oxoisovalerate dehydrogenase subunit alpha, mitochondrial OS=Mus musculus GN=Bckdha PE=1 SV=1 - [ODBA_MOUSE]	32.3	0.0362	1	1	1	1	442	50.3	8.06
Q60597	2-oxoglutarate dehydrogenase, mitochondrial OS=Mus musculus GN=Ogdh PE=1 SV=3 - [ODO1_MOUSE]	628.7	0.2199	1	19	19	31	1023	116.4	6.83
Q9D2G2	Dihydrolipoyllysine-residue succinyltransferase component of 2-oxoglutarate dehydrogenase complex, mitochondrial OS=Mus musculus GN=Dlst PE=1 SV=1 - [ODO2_MOUSE]	440.13	0.2863	1	11	11	25	454	49	8.95
Q8BMF4	Dihydrolipoyllysine-residue acetyltransferase component of pyruvate dehydrogenase complex, mitochondrial OS=Mus musculus GN=Dlat PE=1 SV=2 - [ODP2_MOUSE]	428.62	0.2819	1	12	12	29	642	67.9	8.57
P35486	Pyruvate dehydrogenase E1 component subunit alpha, somatic form, mitochondrial OS=Mus musculus GN=Pdha1 PE=1 SV=1 - [ODPA_MOUSE]	258.98	0.3051	1	9	9	16	390	43.2	8.19
Q9D051	Pyruvate dehydrogenase E1 component subunit beta, mitochondrial OS=Mus musculus GN=Pdhb PE=1 SV=1 - [ODPB_MOUSE]	322.16	0.2841	1	8	8	29	359	38.9	6.87
Q8BKZ9	Pyruvate dehydrogenase protein X component, mitochondrial OS=Mus musculus GN=Pdhx PE=2 SV=1 - [ODPX_MOUSE]	61.41	0.0499	1	2	2	3	501	54	7.75
Q91ZW2	GDP-fucose protein O-fucosyltransferase 1 OS=Mus musculus GN=Pofut1 PE=1 SV=1 - [OFUT1_MOUSE]	87.95	0.145	1	3	3	3	393	44.7	8.41
Q99PG2	Opioid growth factor receptor OS=Mus musculus GN=Ogfr PE=2 SV=1 - [OGFR_MOUSE]	210.36	0.2543	1	7	7	9	633	70.6	4.77
Q8CGY8	UDP-N-acetylglucosamine--peptide N-acetylglucosaminyltransferase 110 kDa subunit OS=Mus musculus GN=Ogt PE=1 SV=2 - [OGT1_MOUSE]	107.89	0.044	1	4	4	4	1046	116.9	6.7
Q9CZ30	Obg-like ATPase 1 OS=Mus musculus GN=Ola1 PE=1 SV=1 - [OLA1_MOUSE]	305.12	0.2222	1	8	8	16	396	44.7	7.81
P58281	Dynamin-like 120 kDa protein, mitochondrial OS=Mus musculus GN=Opa1 PE=1 SV=1 - [OPA1_MOUSE]	153.53	0.075	1	6	6	7	960	111.3	7.55
Q9JK30	Origin recognition complex subunit 3 OS=Mus musculus GN=Orc3 PE=1 SV=1 - [ORC3_MOUSE]	36.36	0.0378	1	2	2	2	715	82.3	7.4
Q9D8S4	Oligoribonuclease, mitochondrial OS=Mus musculus GN=Rexo2 PE=1 SV=2 - [ORN_MOUSE]	127.89	0.1772	1	3	3	8	237	26.7	7.15
Q8K2C7	Protein OS-9 OS=Mus musculus GN=Os9 PE=1 SV=2 - [OS9_MOUSE]	36.74	0.0283	5	1	2	3	672	76.1	4.84
Q8CI95	Oxysterol-binding protein-related protein 11 OS=Mus musculus GN=Osbpl11 PE=1 SV=2 - [OSB11_MOUSE]	93.44	0.0652	1	4	4	6	751	83.6	7.01
Q9DBS9	Oxysterol-binding protein-related protein 3 OS=Mus musculus GN=Osbpl3 PE=1 SV=2 - [OSBL3_MOUSE]	129.72	0.0737	1	5	5	5	855	96.9	6.51
A2A8Z1	Oxysterol-binding protein-related protein 9 OS=Mus musculus GN=Osbpl9 PE=1 SV=1 - [OSBL9_MOUSE]	51.59	0.0516	1	3	3	4	736	83.1	6.07
Q8BWU5	Probable tRNA N6-adenosine threonylcarbamoyltransferase OS=Mus musculus GN=Osgep PE=2 SV=2 - [OSGEP_MOUSE]	49.13	0.1075	1	2	2	4	335	36.3	6.24
O54734	Dolichyl-diphosphooligosaccharide--protein glycosyltransferase 48 kDa subunit OS=Mus musculus GN=Ddost PE=1 SV=2 - [OST48_MOUSE]	355.35	0.2358	1	9	9	22	441	49	5.83
Q78XF5	Oligosaccharyltransferase complex subunit OSTC OS=Mus musculus GN=Ostc PE=2 SV=1 - [OSTC_MOUSE]	38.84	0.0805	1	1	1	4	149	16.8	9.13
Q62422	Osteoclast-stimulating factor 1 OS=Mus musculus GN=Ostf1 PE=1 SV=2 - [OSTF1_MOUSE]	137.48	0.3163	1	4	4	11	215	23.8	5.68
P10923	Osteopontin OS=Mus musculus GN=Spp1 PE=1 SV=1 - [OSTP_MOUSE]	32.92	0.0646	1	1	1	1	294	32.4	4.53
Q8K2H2	OTU domain-containing protein 6B OS=Mus musculus GN=Otud6b PE=2 SV=1 - [OTU6B_MOUSE]	63.02	0.1497	1	3	3	3	294	33.7	5.53
Q7TQI3	Ubiquitin thioesterase OTUB1 OS=Mus musculus GN=Otub1 PE=1 SV=2 - [OTUB1_MOUSE]	457.33	0.3801	1	9	9	36	271	31.3	4.94
B2RRE7	OTU domain-containing protein 4 OS=Mus musculus GN=Otud4 PE=1 SV=1 - [OTUD4_MOUSE]	22.95	0.0145	1	1	1	2	1107	123	6.76
Q9D7E3	Ovarian cancer-associated gene 2 protein homolog OS=Mus musculus GN=Ovca2 PE=2 SV=1 - [OVCA2_MOUSE]	93.28	0.1244	1	3	3	3	225	24.2	5.88
Q6P9R2	Serine/threonine-protein kinase OSR1 OS=Mus musculus GN=Oxsr1 PE=1 SV=1 - [OXSR1_MOUSE]	198.03	0.1309	1	3	4	7	527	58.2	6.43
Q3V1T4	Prolyl 3-hydroxylase 1 OS=Mus musculus GN=Lepre1 PE=2 SV=2 - [P3H1_MOUSE]	104.63	0.0514	1	3	3	5	739	83.6	5.14
Q60715	Prolyl 4-hydroxylase subunit alpha-1 OS=Mus musculus GN=P4ha1 PE=2 SV=2 - [P4HA1_MOUSE]	659.31	0.4082	1	19	19	45	534	60.9	5.9
Q60716	Prolyl 4-hydroxylase subunit alpha-2 OS=Mus musculus GN=P4ha2 PE=2 SV=1 - [P4HA2_MOUSE]	124.37	0.0968	1	4	4	6	537	61	5.8
Q922R5	Serine/threonine-protein phosphatase 4 regulatory subunit 3B OS=Mus musculus GN=Smek2 PE=2 SV=2 - [P4R3B_MOUSE]	10.39	0.0159	1	1	1	1	820	93.9	4.86
P02340	Cellular tumor antigen p53 OS=Mus musculus GN=Tp53 PE=1 SV=3 - [P53_MOUSE]	183.55	0.1499	1	4	4	13	387	43.1	7.23
Q922Q4	Pyrroline-5-carboxylate reductase 2 OS=Mus musculus GN=Pycr2 PE=2 SV=1 - [P5CR2_MOUSE]	161.51	0.1656	2	4	4	8	320	33.6	7.77
Q9DCC4	Pyrroline-5-carboxylate reductase 3 OS=Mus musculus GN=Pycrl PE=2 SV=2 - [P5CR3_MOUSE]	214.02	0.281	1	5	5	12	274	28.7	7.27
Q9Z110	Delta-1-pyrroline-5-carboxylate synthase OS=Mus musculus GN=Aldh18a1 PE=2 SV=2 - [P5CS_MOUSE]	562.76	0.2667	1	17	17	32	795	87.2	7.55
Q8CHY6	Transcriptional repressor p66 alpha OS=Mus musculus GN=Gatad2a PE=1 SV=2 - [P66A_MOUSE]	118.65	0.089	1	4	5	6	629	67.3	9.89
Q8VHR5	Transcriptional repressor p66-beta OS=Mus musculus GN=Gatad2b PE=1 SV=1 - [P66B_MOUSE]	125.03	0.1044	1	4	5	6	594	65.4	9.7
Q61206	Platelet-activating factor acetylhydrolase IB subunit beta OS=Mus musculus GN=Pafah1b2 PE=1 SV=2 - [PA1B2_MOUSE]	68.06	0.1266	1	2	2	13	229	25.6	5.92
Q61205	Platelet-activating factor acetylhydrolase IB subunit gamma OS=Mus musculus GN=Pafah1b3 PE=1 SV=1 - [PA1B3_MOUSE]	174.23	0.181	1	4	4	11	232	25.8	6.93
P47713	Cytosolic phospholipase A2 OS=Mus musculus GN=Pla2g4a PE=1 SV=1 - [PA24A_MOUSE]	66.82	0.0775	1	4	4	5	748	85.2	5.43
P50580	Proliferation-associated protein 2G4 OS=Mus musculus GN=Pa2g4 PE=1 SV=3 - [PA2G4_MOUSE]	612.02	0.4898	1	18	18	48	394	43.7	6.86
P29341	Polyadenylate-binding protein 1 OS=Mus musculus GN=Pabpc1 PE=1 SV=2 - [PABP1_MOUSE]	943.31	0.3868	1	26	26	105	636	70.6	9.5
Q8CCS6	Polyadenylate-binding protein 2 OS=Mus musculus GN=Pabpn1 PE=2 SV=3 - [PABP2_MOUSE]	82.63	0.096	1	3	3	7	302	32.3	5.17
Q9WVE8	Protein kinase C and casein kinase substrate in neurons protein 2 OS=Mus musculus GN=Pacsin2 PE=1 SV=1 - [PACN2_MOUSE]	366.54	0.2963	1	14	14	21	486	55.8	5.2
Q99JB8	Protein kinase C and casein kinase II substrate protein 3 OS=Mus musculus GN=Pacsin3 PE=1 SV=1 - [PACN3_MOUSE]	207.32	0.2406	1	8	8	9	424	48.6	6.1
Q8K212	Phosphofurin acidic cluster sorting protein 1 OS=Mus musculus GN=Pacs1 PE=2 SV=2 - [PACS1_MOUSE]	49.68	0.0281	1	2	2	2	961	104.8	7.74
Q3V3Q7	Phosphofurin acidic cluster sorting protein 2 OS=Mus musculus GN=Pacs2 PE=2 SV=2 - [PACS2_MOUSE]	26.05	0.0104	1	1	1	1	862	94.9	6.51
Q8K2T8	RNA polymerase II-associated factor 1 homolog OS=Mus musculus GN=Paf1 PE=2 SV=1 - [PAF1_MOUSE]	20.35	0.0224	1	1	1	1	535	60.5	4.65
Q8R3U1	HRAS-like suppressor 3 OS=Mus musculus GN=Pla2g16 PE=1 SV=2 - [HRSL3_MOUSE]	43.56	0.1296	1	1	1	1	162	17.9	8.72
P22777	Plasminogen activator inhibitor 1 OS=Mus musculus GN=Serpine1 PE=1 SV=1 - [PAI1_MOUSE]	620.56	0.5771	1	17	17	28	402	45.1	6.64
Q8VE62	Polyadenylate-binding protein-interacting protein 1 OS=Mus musculus GN=Paip1 PE=2 SV=1 - [PAIP1_MOUSE]	69.92	0.0475	1	2	2	2	400	45.7	4.55
Q9CY58	Plasminogen activator inhibitor 1 RNA-binding protein OS=Mus musculus GN=Serbp1 PE=1 SV=2 - [PAIRB_MOUSE]	480.67	0.3292	1	15	15	48	407	44.7	8.54
Q8CIN4	Serine/threonine-protein kinase PAK 2 OS=Mus musculus GN=Pak2 PE=1 SV=1 - [PAK2_MOUSE]	472.67	0.3321	3	12	12	31	524	57.9	5.77
P70261	Paladin OS=Mus musculus GN=Pald1 PE=1 SV=1 - [PALD_MOUSE]	31.57	0.021	1	1	1	1	859	96.7	6.58
Q9ET54	Palladin OS=Mus musculus GN=Palld PE=1 SV=2 - [PALLD_MOUSE]	528.15	0.1506	2	16	16	45	1408	152	6.25
Q8BR92	Paralemmin-2 OS=Mus musculus GN=Palm2 PE=1 SV=1 - [PALM2_MOUSE]	32.93	0.0346	1	1	1	1	376	42.1	5.15
A2TJV2	Paralemmin-3 OS=Mus musculus GN=Palm3 PE=2 SV=1 - [PALM3_MOUSE]	249.14	0.1253	1	7	7	13	734	78.7	4.5
Q9Z0P4	Paralemmin-1 OS=Mus musculus GN=Palm PE=1 SV=1 - [PALM_MOUSE]	159.65	0.1097	1	4	4	7	383	41.6	4.84
Q8C0L6	Peroxisomal N(1)-acetyl-spermine/spermidine oxidase OS=Mus musculus GN=Paox PE=1 SV=3 - [PAOX_MOUSE]	50.51	0.0317	1	1	1	1	504	55.4	5.11
Q61183	Poly(A) polymerase alpha OS=Mus musculus GN=Papola PE=1 SV=4 - [PAPOA_MOUSE]	41.64	0.0433	1	2	2	3	739	82.3	7.34
[truncated: 1,298 more rows]

## Sheet: Table S2
Table S2. The ratio of differentially expressed proteins in PAN treatment group to the control group.
Accession	Description	Score	Coverage	# Proteins	# Unique Peptides	# Peptides	# PSMs	# AAs	MW (kDa)	calc. pI	A2/A1
P07724	Serum albumin OS=Mus musculus GN=Alb PE=1 SV=3 - [ALBU_MOUSE]	189.1	0.0789	1	4	4	18	608	68.6	6.07	4.85
P62267	40S ribosomal protein S23 OS=Mus musculus GN=Rps23 PE=2 SV=3 - [RS23_MOUSE]	165.52	0.3007	1	5	5	20	143	15.8	10.49	0.635
Q6NXH9	Keratin, type II cytoskeletal 73 OS=Mus musculus GN=Krt73 PE=1 SV=1 - [K2C73_MOUSE]	75.51	0.0427	2	2	2	5	539	58.9	8.09	0.718
P62245	40S ribosomal protein S15a OS=Mus musculus GN=Rps15a PE=2 SV=2 - [RS15A_MOUSE]	259.49	0.5692	1	8	8	24	130	14.8	10.13	0.782
P62301	40S ribosomal protein S13 OS=Mus musculus GN=Rps13 PE=2 SV=2 - [RS13_MOUSE]	300.49	0.5828	1	10	10	34	151	17.2	10.54	0.735
P62900	60S ribosomal protein L31 OS=Mus musculus GN=Rpl31 PE=2 SV=1 - [RL31_MOUSE]	249.84	0.392	1	7	7	30	125	14.5	10.54	0.738
P62082	40S ribosomal protein S7 OS=Mus musculus GN=Rps7 PE=2 SV=1 - [RS7_MOUSE]	422.29	0.4381	1	10	10	73	194	22.1	10.1	0.761
P62242	40S ribosomal protein S8 OS=Mus musculus GN=Rps8 PE=2 SV=2 - [RS8_MOUSE]	393.09	0.5288	1	10	10	51	208	24.2	10.32	0.703
P62281	40S ribosomal protein S11 OS=Mus musculus GN=Rps11 PE=2 SV=3 - [RS11_MOUSE]	288.09	0.5063	1	9	9	25	158	18.4	10.3	0.595
P62751	60S ribosomal protein L23a OS=Mus musculus GN=Rpl23a PE=1 SV=1 - [RL23A_MOUSE]	278.99	0.4295	1	8	8	33	156	17.7	10.45	0.714
P61358	60S ribosomal protein L27 OS=Mus musculus GN=Rpl27 PE=1 SV=2 - [RL27_MOUSE]	192.79	0.4632	2	6	6	28	136	15.8	10.56	0.692
P62806	Histone H4 OS=Mus musculus GN=Hist1h4a PE=1 SV=2 - [H4_MOUSE]	477.59	0.6019	1	10	10	159	103	11.4	11.36	0.796
P62754	40S ribosomal protein S6 OS=Mus musculus GN=Rps6 PE=1 SV=1 - [RS6_MOUSE]	343.48	0.3293	1	9	9	41	249	28.7	10.84	0.739
P62264	40S ribosomal protein S14 OS=Mus musculus GN=Rps14 PE=2 SV=3 - [RS14_MOUSE]	330.32	0.3974	1	6	6	30	151	16.3	10.05	0.772
P83882	60S ribosomal protein L36a OS=Mus musculus GN=Rpl36a PE=2 SV=2 - [RL36A_MOUSE]	85.1	0.3113	1	4	4	6	106	12.4	10.58	0.675
P14131	40S ribosomal protein S16 OS=Mus musculus GN=Rps16 PE=2 SV=4 - [RS16_MOUSE]	171.39	0.4041	1	6	6	18	146	16.4	10.21	0.723
Q8BP67	60S ribosomal protein L24 OS=Mus musculus GN=Rpl24 PE=2 SV=2 - [RL24_MOUSE]	175.29	0.3121	1	5	5	10	157	17.8	11.25	0.569
P62702	40S ribosomal protein S4, X isoform OS=Mus musculus GN=Rps4x PE=2 SV=2 - [RS4X_MOUSE]	579.8	0.5817	1	17	17	69	263	29.6	10.15	0.719
Q6ZWV3	60S ribosomal protein L10 OS=Mus musculus GN=Rpl10 PE=2 SV=3 - [RL10_MOUSE]	276.15	0.5	2	12	12	29	214	24.6	10.08	0.749
P62849	40S ribosomal protein S24 OS=Mus musculus GN=Rps24 PE=2 SV=1 - [RS24_MOUSE]	124.17	0.2857	1	3	3	23	133	15.4	10.78	0.766
P62830	60S ribosomal protein L23 OS=Mus musculus GN=Rpl23 PE=1 SV=1 - [RL23_MOUSE]	296	0.5714	1	9	9	20	140	14.9	10.51	0.718
P62315	Small nuclear ribonucleoprotein Sm D1 OS=Mus musculus GN=Snrpd1 PE=1 SV=1 - [SMD1_MOUSE]	96.08	0.2773	1	2	2	10	119	13.3	11.56	0.809
P62843	40S ribosomal protein S15 OS=Mus musculus GN=Rps15 PE=2 SV=2 - [RS15_MOUSE]	167.56	0.4138	1	4	4	14	145	17	10.39	0.676
Q9CXW4	60S ribosomal protein L11 OS=Mus musculus GN=Rpl11 PE=1 SV=4 - [RL11_MOUSE]	206.58	0.2921	1	6	6	24	178	20.2	9.6	0.828
P62270	40S ribosomal protein S18 OS=Mus musculus GN=Rps18 PE=1 SV=3 - [RS18_MOUSE]	392.08	0.5724	1	12	12	44	152	17.7	10.99	0.632
P62852	40S ribosomal protein S25 OS=Mus musculus GN=Rps25 PE=2 SV=1 - [RS25_MOUSE]	195.03	0.384	1	6	6	24	125	13.7	10.11	0.759
P62911	60S ribosomal protein L32 OS=Mus musculus GN=Rpl32 PE=2 SV=2 - [RL32_MOUSE]	241.05	0.4593	1	8	8	22	135	15.8	11.33	0.794
P62855	40S ribosomal protein S26 OS=Mus musculus GN=Rps26 PE=2 SV=3 - [RS26_MOUSE]	118.73	0.313	1	3	3	8	115	13	11	0.743
Q9CZM2	60S ribosomal protein L15 OS=Mus musculus GN=Rpl15 PE=2 SV=4 - [RL15_MOUSE]	194.68	0.348	1	6	6	18	204	24.1	11.62	0.774
Q9JLR1	Protein transport protein Sec61 subunit alpha isoform 2 OS=Mus musculus GN=Sec61a2 PE=2 SV=3 - [S61A2_MOUSE]	118.92	0.1239	1	1	4	6	476	52.2	8.06	0.771
Q6ZWN5	40S ribosomal protein S9 OS=Mus musculus GN=Rps9 PE=2 SV=3 - [RS9_MOUSE]	223.63	0.3196	1	7	7	13	194	22.6	10.65	0.694
P62918	60S ribosomal protein L8 OS=Mus musculus GN=Rpl8 PE=2 SV=2 - [RL8_MOUSE]	343.01	0.4125	1	10	10	21	257	28	11.03	0.75
P68433	Histone H3.1 OS=Mus musculus GN=Hist1h3a PE=1 SV=2 - [H31_MOUSE]	254.17	0.6029	1	1	9	51	136	15.4	11.12	0.759
P61226	Ras-related protein Rap-2b OS=Mus musculus GN=Rap2b PE=1 SV=1 - [RAP2B_MOUSE]	107.27	0.1803	3	3	3	7	183	20.5	4.81	1.253
P60867	40S ribosomal protein S20 OS=Mus musculus GN=Rps20 PE=2 SV=1 - [RS20_MOUSE]	147.14	0.3613	1	5	5	20	119	13.4	9.94	0.815
Q91X97	Neurocalcin-delta OS=Mus musculus GN=Ncald PE=1 SV=4 - [NCALD_MOUSE]	23.09	0.0622	1	1	1	2	193	22.2	5.35	1.212
P61255	60S ribosomal protein L26 OS=Mus musculus GN=Rpl26 PE=2 SV=1 - [RL26_MOUSE]	200.04	0.3586	1	8	8	19	145	17.2	10.55	0.622
P46935	E3 ubiquitin-protein ligase NEDD4 OS=Mus musculus GN=Nedd4 PE=1 SV=3 - [NEDD4_MOUSE]	691.82	0.2604	1	16	20	52	887	102.6	5.26	0.77
Q3UV17	Keratin, type II cytoskeletal 2 oral OS=Mus musculus GN=Krt76 PE=2 SV=1 - [K22O_MOUSE]	91.28	0.0455	6	1	3	5	594	62.8	8.43	0.704
Q8BGZ7	Keratin, type II cytoskeletal 75 OS=Mus musculus GN=Krt75 PE=1 SV=1 - [K2C75_MOUSE]	107.94	0.0544	9	1	3	10	551	59.7	8.31	0.669
P84099	60S ribosomal protein L19 OS=Mus musculus GN=Rpl19 PE=1 SV=1 - [RL19_MOUSE]	114.7	0.1327	1	4	4	9	196	23.5	11.47	0.629
Q8VED5	Keratin, type II cytoskeletal 79 OS=Mus musculus GN=Krt79 PE=2 SV=2 - [K2C79_MOUSE]	63.15	0.0358	5	1	2	4	531	57.5	7.69	0.571
P30275	Creatine kinase U-type, mitochondrial OS=Mus musculus GN=Ckmt1 PE=1 SV=1 - [KCRU_MOUSE]	54.78	0.0502	1	1	1	2	418	47	8.16	0.783
Q8C0J2	Autophagy-related protein 16-1 OS=Mus musculus GN=Atg16l1 PE=1 SV=1 - [A16L1_MOUSE]	83.21	0.0313	1	2	2	3	607	68.1	6.38	1.365
P12023	Amyloid beta A4 protein OS=Mus musculus GN=App PE=1 SV=3 - [A4_MOUSE]	72.59	0.0299	1	2	2	2	770	86.7	4.79	0.51
Q8VCR7	Alpha/beta hydrolase domain-containing protein 14B OS=Mus musculus GN=Abhd14b PE=2 SV=1 - [ABHEB_MOUSE]	226.88	0.2714	1	5	5	10	210	22.4	6.27	1.211
Q8K4G5	Actin-binding LIM protein 1 OS=Mus musculus GN=Ablim1 PE=1 SV=1 - [ABLM1_MOUSE]	219.95	0.0743	1	6	6	11	861	96.7	8.63	0.82
Q99J27	Acetyl-coenzyme A transporter 1 OS=Mus musculus GN=Slc33a1 PE=1 SV=1 - [ACATN_MOUSE]	42.06	0.0236	1	1	1	1	550	61	8.16	0.828
P00329	Alcohol dehydrogenase 1 OS=Mus musculus GN=Adh1 PE=2 SV=2 - [ADH1_MOUSE]	42.33	0.0267	1	1	2	3	375	39.7	8.1	0.794
Q9WTQ5	A-kinase anchor protein 12 OS=Mus musculus GN=Akap12 PE=1 SV=1 - [AKA12_MOUSE]	1872.96	0.3723	1	45	45	119	1684	180.6	4.44	0.766
O08715	A-kinase anchor protein 1, mitochondrial OS=Mus musculus GN=Akap1 PE=1 SV=4 - [AKAP1_MOUSE]	38.96	0.0152	1	1	1	1	857	92.1	5.02	1.223
O35945	Aldehyde dehydrogenase, cytosolic 1 OS=Mus musculus GN=Aldh1a7 PE=2 SV=1 - [AL1A7_MOUSE]	56.26	0.0379	3	1	2	3	501	54.6	7.71	0.695
Q3UMR0	Ankyrin repeat domain-containing protein 27 OS=Mus musculus GN=Ankrd27 PE=1 SV=2 - [ANR27_MOUSE]	20.65	0.0124	1	1	1	1	1048	116.7	6.65	0.77
B2RXR6	Serine/threonine-protein phosphatase 6 regulatory ankyrin repeat subunit B OS=Mus musculus GN=Ankrd44 PE=2 SV=1 - [ANR44_MOUSE]	43.9	0.0191	1	2	2	2	993	107.3	6.42	0.754
Q8BTZ4	Anaphase-promoting complex subunit 5 OS=Mus musculus GN=Anapc5 PE=2 SV=1 - [APC5_MOUSE]	60.54	0.0189	1	1	1	2	740	83	6.71	1.256
Q01339	Beta-2-glycoprotein 1 OS=Mus musculus GN=Apoh PE=1 SV=1 - [APOH_MOUSE]	14.81	0.0261	1	1	1	1	345	38.6	8.22	1.271
Q61210	Rho guanine nucleotide exchange factor 1 OS=Mus musculus GN=Arhgef1 PE=1 SV=2 - [ARHG1_MOUSE]	90.48	0.0402	1	3	3	3	920	102.7	5.6	1.203
Q9DBR3	Armadillo repeat-containing protein 8 OS=Mus musculus GN=Armc8 PE=2 SV=2 - [ARMC8_MOUSE]	48.07	0.0282	1	1	1	1	673	75.3	6.73	1.313
P97857	A disintegrin and metalloproteinase with thrombospondin motifs 1 OS=Mus musculus GN=Adamts1 PE=1 SV=4 - [ATS1_MOUSE]	361.13	0.1415	1	9	9	16	968	105.7	7.83	0.745
Q60739	BAG family molecular chaperone regulator 1 OS=Mus musculus GN=Bag1 PE=1 SV=3 - [BAG1_MOUSE]	77.82	0.0535	1	2	2	2	355	39.7	8.46	1.208
Q07813	Apoptosis regulator BAX OS=Mus musculus GN=Bax PE=1 SV=1 - [BAX_MOUSE]	54.78	0.0677	1	1	1	3	192	21.4	4.98	1.257
Q9DCA5	Ribosome biogenesis protein BRX1 homolog OS=Mus musculus GN=Brix1 PE=2 SV=3 - [BRX1_MOUSE]	20.14	0.0198	1	1	1	1	353	41.2	10.02	0.66
O08901	Mitotic checkpoint serine/threonine-protein kinase BUB1 OS=Mus musculus GN=Bub1 PE=2 SV=1 - [BUB1_MOUSE]	23.42	0.0161	1	1	1	1	1058	119.5	6.1	1.452
P14211	Calreticulin OS=Mus musculus GN=Calr PE=1 SV=1 - [CALR_MOUSE]	601.58	0.5096	1	19	19	109	416	48	4.49	0.829
Q9WVG6	Histone-arginine methyltransferase CARM1 OS=Mus musculus GN=Carm1 PE=1 SV=2 - [CARM1_MOUSE]	56.15	0.0362	1	1	1	1	608	65.8	6.77	0.832
P49817	Caveolin-1 OS=Mus musculus GN=Cav1 PE=1 SV=1 - [CAV1_MOUSE]	93.19	0.2528	1	3	3	5	178	20.5	6.02	1.215
Q9D8X2	Coiled-coil domain-containing protein 124 OS=Mus musculus GN=Ccdc124 PE=2 SV=1 - [CC124_MOUSE]	51.78	0.0599	1	1	1	1	217	25.3	9.64	1.345
Q9D8L5	Coiled-coil domain-containing protein 91 OS=Mus musculus GN=Ccdc91 PE=2 SV=2 - [CCD91_MOUSE]	25.37	0.0181	1	1	1	1	442	50	5.07	1.206
Q8CFE2	UPF0609 protein C4orf27 homolog OS=Mus musculus PE=2 SV=1 - [CD027_MOUSE]	89.18	0.0607	1	2	2	2	346	39.3	7.69	1.249
Q8CII2	Cell division cycle protein 123 homolog OS=Mus musculus GN=Cdc123 PE=2 SV=2 - [CD123_MOUSE]	118.39	0.0833	1	2	3	8	336	38.8	4.67	0.823
P40237	CD82 antigen OS=Mus musculus GN=Cd82 PE=1 SV=1 - [CD82_MOUSE]	33.34	0.0752	1	2	2	3	266	29.6	5.02	0.736
Q04899	Cyclin-dependent kinase 18 OS=Mus musculus GN=Cdk18 PE=1 SV=1 - [CDK18_MOUSE]	85.05	0.0576	14	1	2	7	451	51.8	8.51	0.816
Q99J95	Cyclin-dependent kinase 9 OS=Mus musculus GN=Cdk9 PE=1 SV=1 - [CDK9_MOUSE]	89.69	0.0618	14	1	2	7	372	42.7	8.79	1.269
Q8VCE4	Uncharacterized protein C9orf40 homolog OS=Mus musculus PE=2 SV=1 - [CI040_MOUSE]	31.8	0.0859	1	1	1	3	163	18	4.75	1.337
O35492	Dual specificity protein kinase CLK3 OS=Mus musculus GN=Clk3 PE=1 SV=2 - [CLK3_MOUSE]	43.63	0.0313	1	1	1	1	638	73.8	9.94	0.791
Q06890	Clusterin OS=Mus musculus GN=Clu PE=1 SV=1 - [CLUS_MOUSE]	31.46	0.0268	1	1	1	2	448	51.6	5.67	0.797
Q9D8X5	CCR4-NOT transcription complex subunit 8 OS=Mus musculus GN=Cnot8 PE=2 SV=1 - [CNOT8_MOUSE]	35.22	0.0377	1	1	1	1	292	33.6	4.81	0.691
P01027	Complement C3 OS=Mus musculus GN=C3 PE=1 SV=3 - [CO3_MOUSE]	43.17	0.0138	1	2	2	2	1663	186.4	6.73	1.278
P02463	Collagen alpha-1(IV) chain OS=Mus musculus GN=Col4a1 PE=2 SV=4 - [CO4A1_MOUSE]	83.21	0.0198	1	3	3	3	1669	160.6	8.24	0.574
Q61245	Collagen alpha-1(XI) chain OS=Mus musculus GN=Col11a1 PE=1 SV=2 - [COBA1_MOUSE]	30.15	0.0067	2	1	1	1	1804	180.9	5.21	0.811
P39061	Collagen alpha-1(XVIII) chain OS=Mus musculus GN=Col18a1 PE=1 SV=4 - [COIA1_MOUSE]	234.14	0.0581	1	7	7	14	1774	182.1	5.62	0.749
Q3V4B5	COMM domain-containing protein 6 OS=Mus musculus GN=Commd6 PE=2 SV=1 - [COMD6_MOUSE]	48.29	0.1034	1	1	1	5	87	9.8	5.38	1.239
Q8K0C8	Cytochrome c oxidase assembly protein COX19 OS=Mus musculus GN=Cox19 PE=3 SV=1 - [COX19_MOUSE]	27.53	0.1087	1	1	1	1	92	10.8	8.07	1.209
Q80ZM8	Cardiolipin synthase OS=Mus musculus GN=Crls1 PE=2 SV=1 - [CRLS1_MOUSE]	27.69	0.066	1	1	1	1	303	32.5	9.86	1.754
P07141	Macrophage colony-stimulating factor 1 OS=Mus musculus GN=Csf1 PE=1 SV=2 - [CSF1_MOUSE]	29.44	0.0254	1	1	1	1	552	60.6	5.24	0.798
Q09143	High affinity cationic amino acid transporter 1 OS=Mus musculus GN=Slc7a1 PE=1 SV=1 - [CTR1_MOUSE]	15.39	0.0161	1	1	1	2	622	67	7.06	0.824
Q9D4H8	Cullin-2 OS=Mus musculus GN=Cul2 PE=1 SV=2 - [CUL2_MOUSE]	105.06	0.0711	1	4	4	4	745	86.8	7.01	1.277
P53564	Homeobox protein cut-like 1 OS=Mus musculus GN=Cux1 PE=1 SV=3 - [CUX1_MOUSE]	69.42	0.035	2	4	4	4	1515	165.5	6.32	0.801
Q9QZB9	Dynactin subunit 5 OS=Mus musculus GN=Dctn5 PE=1 SV=1 - [DCTN5_MOUSE]	29.97	0.0385	1	1	1	2	182	20.1	8.02	1.353
Q9D0R4	Probable ATP-dependent RNA helicase DDX56 OS=Mus musculus GN=Ddx56 PE=2 SV=1 - [DDX56_MOUSE]	74.8	0.0366	1	1	2	2	546	61.2	9.17	0.659
Q6Q899	Probable ATP-dependent RNA helicase DDX58 OS=Mus musculus GN=Ddx58 PE=1 SV=2 - [DDX58_MOUSE]	32.2	0.0173	1	1	1	1	926	105.9	6.65	1.269
O88455	7-dehydrocholesterol reductase OS=Mus musculus GN=Dhcr7 PE=2 SV=1 - [DHCR7_MOUSE]	49.22	0.0361	1	2	2	2	471	53.9	8.35	0.766
O88508	DNA (cytosine-5)-methyltransferase 3A OS=Mus musculus GN=Dnmt3a PE=1 SV=2 - [DNM3A_MOUSE]	26.67	0.0198	1	1	1	1	908	101.6	6.65	0.685
A2AF47	Dedicator of cytokinesis protein 11 OS=Mus musculus GN=Dock11 PE=1 SV=1 - [DOC11_MOUSE]	24.21	0.0043	1	1	1	1	2073	237.6	7.78	1.227
Q8BUR4	Dedicator of cytokinesis protein 1 OS=Mus musculus GN=Dock1 PE=1 SV=3 - [DOCK1_MOUSE]	61.86	0.0118	1	2	2	2	1865	214.9	7.62	0.781
Q9ET22	Dipeptidyl peptidase 2 OS=Mus musculus GN=Dpp7 PE=2 SV=2 - [DPP2_MOUSE]	20.16	0.0277	1	1	1	1	506	56.2	5.39	1.243
Q9CYC5	Kinetochore-associated protein DSN1 homolog OS=Mus musculus GN=Dsn1 PE=2 SV=1 - [DSN1_MOUSE]	45.17	0.0431	1	1	1	1	348	39.5	6.21	1.394
Q91ZU6	Dystonin OS=Mus musculus GN=Dst PE=1 SV=1 - [DYST_MOUSE]	25.54	0.0015	1	1	1	2	7389	833.1	5.31	0.718
Q9Z2H5	Band 4.1-like protein 1 OS=Mus musculus GN=Epb41l1 PE=1 SV=2 - [E41L1_MOUSE]	68.86	0.0307	1	2	2	2	879	98.3	5.62	1.471
Q8BGS1	Band 4.1-like protein 5 OS=Mus musculus GN=Epb41l5 PE=1 SV=1 - [E41L5_MOUSE]	64.73	0.0328	2	2	2	3	731	81.6	6.39	0.68
Q9D903	Probable rRNA-processing protein EBP2 OS=Mus musculus GN=Ebna1bp2 PE=2 SV=1 - [EBP2_MOUSE]	45.92	0.0915	1	3	3	4	306	34.7	10.08	0.74
Q9CZX9	ER membrane protein complex subunit 4 OS=Mus musculus GN=Emc4 PE=2 SV=1 - [EMC4_MOUSE]	56.98	0.1202	1	2	2	3	183	20.1	8.62	1.319
P17183	Gamma-enolase OS=Mus musculus GN=Eno2 PE=1 SV=2 - [ENOG_MOUSE]	376.83	0.2304	1	2	7	162	434	47.3	5.11	1.518
P49135	TFIIH basal transcription factor complex helicase XPB subunit OS=Mus musculus GN=Ercc3 PE=2 SV=1 - [ERCC3_MOUSE]	47.02	0.0268	1	1	1	1	783	89.1	7.18	1.238
Q3V1V3	ESF1 homolog OS=Mus musculus GN=Esf1 PE=1 SV=1 - [ESF1_MOUSE]	129.26	0.0828	1	6	6	7	845	98	5.05	1.304
Q9DCL2	MIP18 family protein FAM96A OS=Mus musculus GN=Fam96a PE=2 SV=1 - [FA96A_MOUSE]	57.09	0.0688	1	1	1	2	160	18.4	4.82	1.378
Q76LL6	FH1/FH2 domain-containing protein 3 OS=Mus musculus GN=Fhod3 PE=1 SV=1 - [FHOD3_MOUSE]	16.01	0.0089	1	1	1	1	1578	175.5	5.55	0.71
Q9ER69	Pre-mRNA-splicing regulator WTAP OS=Mus musculus GN=Wtap PE=2 SV=3 - [FL2D_MOUSE]	76.45	0.0682	1	2	2	2	396	44.1	5.25	1.421
Q6ZPF4	Formin-like protein 3 OS=Mus musculus GN=Fmnl3 PE=1 SV=2 - [FMNL3_MOUSE]	114.75	0.0691	2	6	6	8	1028	117.1	6.67	0.769
O35943	Frataxin, mitochondrial OS=Mus musculus GN=Fxn PE=1 SV=1 - [FRDA_MOUSE]	77.37	0.1159	1	2	2	3	207	22.9	8.02	1.267
P97376	Protein FRG1 OS=Mus musculus GN=Frg1 PE=1 SV=2 - [FRG1_MOUSE]	31.1	0.062	1	1	1	1	258	29.1	8.92	1.233
Q62356	Follistatin-related protein 1 OS=Mus musculus GN=Fstl1 PE=1 SV=2 - [FSTL1_MOUSE]	51.81	0.0588	1	2	2	3	306	34.5	5.85	0.677
Q9EPS3	D-glucuronyl C5-epimerase OS=Mus musculus GN=Glce PE=1 SV=2 - [GLCE_MOUSE]	28.62	0.021	1	1	1	1	618	70	8.85	1.484
P21279	Guanine nucleotide-binding protein G(q) subunit alpha OS=Mus musculus GN=Gnaq PE=1 SV=4 - [GNAQ_MOUSE]	87.93	0.1393	2	1	3	6	359	42.1	5.68	0.83
P51655	Glypican-4 OS=Mus musculus GN=Gpc4 PE=2 SV=2 - [GPC4_MOUSE]	56.37	0.07	1	3	3	3	557	62.5	6.33	0.652
Q8VD04	GRIP1-associated protein 1 OS=Mus musculus GN=Gripap1 PE=1 SV=1 - [GRAP1_MOUSE]	15.24	0.0124	1	1	1	1	806	92.7	5.25	1.265
P17809	Solute carrier family 2, facilitated glucose transporter member 1 OS=Mus musculus GN=Slc2a1 PE=1 SV=4 - [GTR1_MOUSE]	12.99	0.0203	1	1	1	1	492	53.9	8.87	0.724
P15864	Histone H1.2 OS=Mus musculus GN=Hist1h1c PE=1 SV=2 - [H12_MOUSE]	358.36	0.3726	2	6	11	43	212	21.3	11	0.786
P43274	Histone H1.4 OS=Mus musculus GN=Hist1h1e PE=1 SV=2 - [H14_MOUSE]	290.87	0.3105	2	3	10	33	219	22	11.11	0.755
P43276	Histone H1.5 OS=Mus musculus GN=Hist1h1b PE=1 SV=2 - [H15_MOUSE]	199.08	0.296	1	4	7	18	223	22.6	10.92	0.795
P02301	Histone H3.3C OS=Mus musculus GN=H3f3c PE=3 SV=3 - [H3C_MOUSE]	241.51	0.6029	2	2	9	55	136	15.3	11.14	0.821
Q61039	Heart- and neural crest derivatives-expressed protein 2 OS=Mus musculus GN=Hand2 PE=1 SV=3 - [HAND2_MOUSE]	18.86	0.0323	1	1	1	1	217	23.7	9.17	1.443
Q8BKT8	HAUS augmin-like complex subunit 7 OS=Mus musculus GN=Haus7 PE=1 SV=2 - [HAUS7_MOUSE]	38.47	0.0522	1	2	2	2	364	40.6	5.06	1.232
P01942	Hemoglobin subunit alpha OS=Mus musculus GN=Hba PE=1 SV=2 - [HBA_MOUSE]	128.24	0.4859	2	5	5	15	142	15.1	8.22	1.233
P02088	Hemoglobin subunit beta-1 OS=Mus musculus GN=Hbb-b1 PE=1 SV=2 - [HBB1_MOUSE]	157.4	0.3469	1	2	4	18	147	15.8	7.65	1.861
P02089	Hemoglobin subunit beta-2 OS=Mus musculus GN=Hbb-b2 PE=1 SV=2 - [HBB2_MOUSE]	107.28	0.2313	2	2	4	15	147	15.9	8.05	1.243
Q8R409	Protein HEXIM1 OS=Mus musculus GN=Hexim1 PE=1 SV=1 - [HEXI1_MOUSE]	87.15	0.1152	1	4	4	5	356	40.2	5.38	1.579
Q9D8V0	Minor histocompatibility antigen H13 OS=Mus musculus GN=Hm13 PE=1 SV=1 - [HM13_MOUSE]	82.69	0.0847	1	3	3	6	378	41.7	6.04	0.819
Q8JZK9	Hydroxymethylglutaryl-CoA synthase, cytoplasmic OS=Mus musculus GN=Hmgcs1 PE=1 SV=1 - [HMCS1_MOUSE]	331.96	0.225	2	10	10	14	520	57.5	5.99	0.695
P17095	High mobility group protein HMG-I/HMG-Y OS=Mus musculus GN=Hmga1 PE=1 SV=4 - [HMGA1_MOUSE]	41.14	0.2243	1	2	2	3	107	11.6	10.32	0.757
P27889	Hepatocyte nuclear factor 1-beta OS=Mus musculus GN=Hnf1b PE=1 SV=2 - [HNF1B_MOUSE]	41.06	0.0251	1	1	1	1	558	61.5	7.75	0.692
Q99JP6	Homer protein homolog 3 OS=Mus musculus GN=Homer3 PE=1 SV=2 - [HOME3_MOUSE]	191.24	0.2107	3	6	6	7	356	39.7	5.36	1.22
Q9D8M3	Heme transporter HRG1 OS=Mus musculus GN=Slc48a1 PE=2 SV=1 - [HRG1_MOUSE]	33.6	0.0822	1	1	1	1	146	16.5	9.45	1.486
Q8K3A0	Iron-sulfur cluster co-chaperone protein HscB, mitochondrial OS=Mus musculus GN=Hscb PE=2 SV=2 - [HSC20_MOUSE]	61.5	0.1068	1	1	2	3	234	26.6	7.37	1.262
Q8K3X4	Interferon regulatory factor 2-binding protein-like OS=Mus musculus GN=Irf2bpl PE=1 SV=1 - [I2BPL_MOUSE]	107.59	0.0658	1	2	4	4	775	80.5	8.24	1.289
O88477	Insulin-like growth factor 2 mRNA-binding protein 1 OS=Mus musculus GN=Igf2bp1 PE=1 SV=1 - [IF2B1_MOUSE]	98.14	0.0572	1	3	3	5	577	63.4	9.2	1.21
Q9CPN8	Insulin-like growth factor 2 mRNA-binding protein 3 OS=Mus musculus GN=Igf2bp3 PE=1 SV=1 - [IF2B3_MOUSE]	71.81	0.0691	1	2	3	4	579	63.5	8.87	1.349
P15092	Interferon-activable protein 204 OS=Mus musculus GN=Ifi204 PE=1 SV=2 - [IFI4_MOUSE]	100.16	0.05	1	1	2	3	640	71.6	8.69	1.515
Q64345	Interferon-induced protein with tetratricopeptide repeats 3 OS=Mus musculus GN=Ifit3 PE=2 SV=1 - [IFIT3_MOUSE]	23.83	0.0323	1	1	1	1	403	47.2	5.64	0.753
Q61730	Interleukin-1 receptor accessory protein OS=Mus musculus GN=Il1rap PE=1 SV=1 - [IL1AP_MOUSE]	38.13	0.0123	1	1	1	1	570	65.7	7.77	1.211
P43406	Integrin alpha-V OS=Mus musculus GN=Itgav PE=1 SV=2 - [ITAV_MOUSE]	286.91	0.1188	1	11	11	16	1044	115.3	5.63	0.8
Q61703	Inter-alpha-trypsin inhibitor heavy chain H2 OS=Mus musculus GN=Itih2 PE=1 SV=1 - [ITIH2_MOUSE]	69.66	0.037	1	3	3	3	946	105.9	7.27	1.712
Q9Z329	Inositol 1,4,5-trisphosphate receptor type 2 OS=Mus musculus GN=Itpr2 PE=1 SV=4 - [ITPR2_MOUSE]	16.49	0.0037	2	1	1	1	2701	307.3	6.44	1.392
Q3UHH1	Zinc finger SWIM domain-containing protein 8 OS=Mus musculus GN=Zswim8 PE=1 SV=1 - [ZSWM8_MOUSE]	59.73	0.0175	1	2	2	2	1832	196.9	6.84	1.252
Q148V7	LisH domain and HEAT repeat-containing protein KIAA1468 OS=Mus musculus GN=Kiaa1468 PE=1 SV=1 - [K1468_MOUSE]	20.07	0.0099	1	1	1	1	1216	134.5	5.34	0.777
P02535	Keratin, type I cytoskeletal 10 OS=Mus musculus GN=Krt10 PE=1 SV=3 - [K1C10_MOUSE]	45.91	0.0211	1	1	1	3	570	57.7	5.11	0.649
P19001	Keratin, type I cytoskeletal 19 OS=Mus musculus GN=Krt19 PE=1 SV=1 - [K1C19_MOUSE]	32.08	0.0174	5	1	1	1	403	44.5	5.39	0.802
Q6IME9	Keratin, type II cytoskeletal 72 OS=Mus musculus GN=Krt72 PE=3 SV=1 - [K2C72_MOUSE]	10.68	0.0231	1	1	1	1	520	56.7	7.4	0.816
P97329	Kinesin-like protein KIF20A OS=Mus musculus GN=Kif20a PE=2 SV=1 - [KI20A_MOUSE]	50.8	0.0271	1	2	2	2	887	99.8	6.99	1.351
Q6P9P6	Kinesin-like protein KIF11 OS=Mus musculus GN=Kif11 PE=2 SV=1 - [KIF11_MOUSE]	49.94	0.02	1	2	2	3	1052	118	6	1.213
Q9QWT9	Kinesin-like protein KIFC1 OS=Mus musculus GN=Kifc1 PE=1 SV=2 - [KIFC1_MOUSE]	62.12	0.0549	1	3	3	3	674	74.1	8.72	1.333
Q9R008	Mevalonate kinase OS=Mus musculus GN=Mvk PE=2 SV=1 - [KIME_MOUSE]	61.16	0.0861	1	2	2	2	395	41.9	6.68	0.742
P53657	Pyruvate kinase PKLR OS=Mus musculus GN=Pklr PE=2 SV=1 - [KPYR_MOUSE]	102.87	0.0732	1	1	3	15	574	62.3	7.09	1.269
P02469	Laminin subunit beta-1 OS=Mus musculus GN=Lamb1 PE=1 SV=3 - [LAMB1_MOUSE]	352.32	0.0834	1	12	12	22	1786	197	4.94	0.806
Q61292	Laminin subunit beta-2 OS=Mus musculus GN=Lamb2 PE=2 SV=2 - [LAMB2_MOUSE]	27.25	0.0056	1	1	1	1	1799	196.5	6.67	1.495
Q7TQ95	Protein lunapark OS=Mus musculus GN=Lnp PE=1 SV=1 - [LNP_MOUSE]	43.78	0.0894	1	2	2	2	425	47.5	5.27	1.294
Q8BFW7	Lipoma-preferred partner homolog OS=Mus musculus GN=Lpp PE=1 SV=1 - [LPP_MOUSE]	313.78	0.186	1	9	9	23	613	65.8	7.37	0.767
Q9ESE1	Lipopolysaccharide-responsive and beige-like anchor protein OS=Mus musculus GN=Lrba PE=1 SV=1 - [LRBA_MOUSE]	31.53	0.0098	1	2	2	2	2856	316.9	5.69	0.743
A2ARV4	Low-density lipoprotein receptor-related protein 2 OS=Mus musculus GN=Lrp2 PE=1 SV=1 - [LRP2_MOUSE]	427.33	0.0504	1	19	19	24	4660	518.9	5.15	0.81
P62313	U6 snRNA-associated Sm-like protein LSm6 OS=Mus musculus GN=Lsm6 PE=2 SV=1 - [LSM6_MOUSE]	27.31	0.1	1	1	1	2	80	9.1	9.58	1.476
Q9CQ22	Ragulator complex protein LAMTOR1 OS=Mus musculus GN=Lamtor1 PE=1 SV=1 - [LTOR1_MOUSE]	51.86	0.1615	1	2	2	3	161	17.7	5.15	0.831
Q9CYI4	Putative RNA-binding protein Luc7-like 1 OS=Mus musculus GN=Luc7l PE=2 SV=2 - [LUC7L_MOUSE]	190.1	0.221	1	5	7	9	371	43.9	9.88	1.229
O54791	Transcription factor MafF OS=Mus musculus GN=Maff PE=2 SV=1 - [MAFF_MOUSE]	34.43	0.0962	1	1	1	1	156	16.9	9.8	1.802
Q3ULD5	Methylcrotonoyl-CoA carboxylase beta chain, mitochondrial OS=Mus musculus GN=Mccc2 PE=1 SV=1 - [MCCB_MOUSE]	31.95	0.0231	1	1	1	3	563	61.3	8	1.294
P97287	Induced myeloid leukemia cell differentiation protein Mcl-1 homolog OS=Mus musculus GN=Mcl1 PE=1 SV=3 - [MCL1_MOUSE]	33.07	0.0634	1	1	1	1	331	35.2	6.2	1.217
Q80V70	Multiple epidermal growth factor-like domains protein 6 OS=Mus musculus GN=Megf6 PE=2 SV=3 - [MEGF6_MOUSE]	31.62	0.0102	1	1	1	1	1572	164.6	6.28	0.671
Q61846	Maternal embryonic leucine zipper kinase OS=Mus musculus GN=Melk PE=1 SV=2 - [MELK_MOUSE]	24.22	0.0264	1	1	1	1	643	72.7	8.72	1.338
P16056	Hepatocyte growth factor receptor OS=Mus musculus GN=Met PE=1 SV=1 - [MET_MOUSE]	45.22	0.008	1	1	1	1	1379	153.5	7.05	0.542
Q9CWG8	NADH dehydrogenase [ubiquinone] complex I, assembly factor 7 OS=Mus musculus GN=Ndufaf7 PE=2 SV=4 - [NDUF7_MOUSE]	24.5	0.0344	1	1	1	1	436	48.4	6.95	1.496
P34884	Macrophage migration inhibitory factor OS=Mus musculus GN=Mif PE=1 SV=2 - [MIF_MOUSE]	110.76	0.1739	1	2	2	8	115	12.5	7.34	0.82
O09110	Dual specificity mitogen-activated protein kinase kinase 3 OS=Mus musculus GN=Map2k3 PE=1 SV=2 - [MP2K3_MOUSE]	24.29	0.049	1	1	1	1	347	39.3	7.43	1.261
P28667	MARCKS-related protein OS=Mus musculus GN=Marcksl1 PE=1 SV=2 - [MRP_MOUSE]	253.27	0.56	1	6	6	20	200	20.2	4.61	1.231
Q9CQ19	Myosin regulatory light polypeptide 9 OS=Mus musculus GN=Myl9 PE=1 SV=3 - [MYL9_MOUSE]	192.95	0.2791	1	1	5	15	172	19.8	4.92	0.761
Q3U898	Myeloma-overexpressed gene 2 protein homolog OS=Mus musculus GN=Myeov2 PE=2 SV=1 - [MYOV2_MOUSE]	47.77	0.3509	1	1	1	1	57	6.2	3.83	1.392
Q9DBR7	Protein phosphatase 1 regulatory subunit 12A OS=Mus musculus GN=Ppp1r12a PE=1 SV=2 - [MYPT1_MOUSE]	95.58	0.0369	1	3	3	3	1029	114.9	5.49	0.784
Q9CY45	N(6)-adenine-specific DNA methyltransferase 2 OS=Mus musculus GN=N6amt2 PE=2 SV=1 - [N6MT2_MOUSE]	38.63	0.0935	1	1	1	1	214	24.5	4.67	1.276
Q7TSZ8	Nucleus accumbens-associated protein 1 OS=Mus musculus GN=Nacc1 PE=1 SV=1 - [NACC1_MOUSE]	43.12	0.0253	1	1	1	2	514	56.5	5.73	1.304
Q8K224	N-acetyltransferase 10 OS=Mus musculus GN=Nat10 PE=2 SV=1 - [NAT10_MOUSE]	194.32	0.0781	1	5	5	7	1024	115.3	8.32	1.246
Q9D6N5	Dr1-associated corepressor OS=Mus musculus GN=Drap1 PE=2 SV=3 - [NC2A_MOUSE]	107.86	0.1171	1	2	2	5	205	22.3	5.26	1.235
Q62433	Protein NDRG1 OS=Mus musculus GN=Ndrg1 PE=1 SV=1 - [NDRG1_MOUSE]	192.89	0.132	1	4	4	10	394	43	6.1	0.743
Q99LY9	NADH dehydrogenase [ubiquinone] iron-sulfur protein 5 OS=Mus musculus GN=Ndufs5 PE=1 SV=3 - [NDUS5_MOUSE]	31.65	0.1132	1	1	1	1	106	12.6	8.92	1.285
Q9R1A3	Netrin-3 OS=Mus musculus GN=Ntn3 PE=2 SV=1 - [NET3_MOUSE]	21.65	0.0207	2	1	1	1	580	62	8.59	0.753
P97863	Nuclear factor 1 B-type OS=Mus musculus GN=Nfib PE=1 SV=2 - [NFIB_MOUSE]	23.84	0.0316	1	1	1	1	570	63.5	8.66	0.828
Q6ZQ12	Ninein-like protein OS=Mus musculus GN=Ninl PE=2 SV=3 - [NINL_MOUSE]	13.14	0.005	1	1	1	1	1394	157.7	5.01	1.466
Q9WV70	Nucleolar complex protein 2 homolog OS=Mus musculus GN=Noc2l PE=1 SV=2 - [NOC2L_MOUSE]	116.66	0.0562	1	3	3	4	747	85.4	5.97	0.818
Q99ME9	Nucleolar GTP-binding protein 1 OS=Mus musculus GN=Gtpbp4 PE=2 SV=3 - [NOG1_MOUSE]	24.27	0.0142	1	1	1	1	634	74.1	9.52	0.77
Q99LH1	Nucleolar GTP-binding protein 2 OS=Mus musculus GN=Gnl2 PE=2 SV=2 - [NOG2_MOUSE]	33.75	0.0206	1	1	1	1	728	83.3	9.2	1.246
Q9CPT5	Nucleolar protein 16 OS=Mus musculus GN=Nop16 PE=2 SV=1 - [NOP16_MOUSE]	59.95	0.1292	1	2	2	3	178	21.1	9.91	0.699
O35516	Neurogenic locus notch homolog protein 2 OS=Mus musculus GN=Notch2 PE=1 SV=1 - [NOTC2_MOUSE]	88.95	0.0162	1	3	3	5	2470	265.1	5.22	0.781
Q9D8W7	OCIA domain-containing protein 2 OS=Mus musculus GN=Ociad2 PE=1 SV=1 - [OCAD2_MOUSE]	42.7	0.0844	1	1	1	1	154	16.9	9.41	0.749
P10923	Osteopontin OS=Mus musculus GN=Spp1 PE=1 SV=1 - [OSTP_MOUSE]	32.92	0.0646	1	1	1	1	294	32.4	4.53	0.774
Q9D7E3	Ovarian cancer-associated gene 2 protein homolog OS=Mus musculus GN=Ovca2 PE=2 SV=1 - [OVCA2_MOUSE]	93.28	0.1244	1	3	3	3	225	24.2	5.88	1.251
Q60715	Prolyl 4-hydroxylase subunit alpha-1 OS=Mus musculus GN=P4ha1 PE=2 SV=2 - [P4HA1_MOUSE]	659.31	0.4082	1	19	19	45	534	60.9	5.9	0.778
Q9ET54	Palladin OS=Mus musculus GN=Palld PE=1 SV=2 - [PALLD_MOUSE]	528.15	0.1506	2	16	16	45	1408	152	6.25	0.818
Q61183	Poly(A) polymerase alpha OS=Mus musculus GN=Papola PE=1 SV=4 - [PAPOA_MOUSE]	41.64	0.0433	1	2	2	3	739	82.3	7.34	1.301
P32114	Paired box protein Pax-2 OS=Mus musculus GN=Pax2 PE=1 SV=2 - [PAX2_MOUSE]	27.92	0.0338	1	1	1	1	414	44.6	7.91	0.641
Q61823	Programmed cell death protein 4 OS=Mus musculus GN=Pdcd4 PE=1 SV=1 - [PDCD4_MOUSE]	59.87	0.0554	1	2	2	2	469	51.7	5.16	0.811
O55057	Retinal rod rhodopsin-sensitive cGMP 3',5'-cyclic phosphodiesterase subunit delta OS=Mus musculus GN=Pde6d PE=1 SV=1 - [PDE6D_MOUSE]	26.61	0.1267	1	1	1	1	150	17.3	5.67	1.303
Q8CI51	PDZ and LIM domain protein 5 OS=Mus musculus GN=Pdlim5 PE=1 SV=4 - [PDLI5_MOUSE]	444.72	0.2741	1	11	11	22	591	63.3	8.25	0.813
P97298	Pigment epithelium-derived factor OS=Mus musculus GN=Serpinf1 PE=1 SV=2 - [PEDF_MOUSE]	34.22	0.0432	1	1	1	1	417	46.2	6.98	1.317
Q8K1N2	Pleckstrin homology-like domain family B member 2 OS=Mus musculus GN=Phldb2 PE=1 SV=2 - [PHLB2_MOUSE]	115.21	0.0408	1	4	4	4	1249	141.4	7.68	0.823
Q7M6Y3	Phosphatidylinositol-binding clathrin assembly protein OS=Mus musculus GN=Picalm PE=1 SV=1 - [PICAL_MOUSE]	263.7	0.1727	2	9	9	17	660	71.5	7.91	0.743
Q9DCE5	p21-activated protein kinase-interacting protein 1 OS=Mus musculus GN=Pak1ip1 PE=2 SV=2 - [PK1IP_MOUSE]	51.3	0.0445	1	1	1	2	382	42.1	8.47	0.817
P70268	Serine/threonine-protein kinase N1 OS=Mus musculus GN=Pkn1 PE=1 SV=3 - [PKN1_MOUSE]	120.46	0.0349	2	3	4	5	946	104.3	6.27	1.214
Q07832	Serine/threonine-protein kinase PLK1 OS=Mus musculus GN=Plk1 PE=1 SV=2 - [PLK1_MOUSE]	47.93	0.0282	1	1	1	2	603	68.3	8.72	1.252
Q9D1G2	Phosphomevalonate kinase OS=Mus musculus GN=Pmvk PE=2 SV=3 - [PMVK_MOUSE]	53.96	0.0938	1	2	2	3	192	21.9	5.99	0.802
Q8K2V1	Serine/threonine-protein phosphatase 4 regulatory subunit 1 OS=Mus musculus GN=Ppp4r1 PE=2 SV=2 - [PP4R1_MOUSE]	40.17	0.0137	1	1	1	1	951	106.2	4.81	1.236
P30412	Peptidyl-prolyl cis-trans isomerase C OS=Mus musculus GN=Ppic PE=1 SV=1 - [PPIC_MOUSE]	158.73	0.2217	1	4	5	20	212	22.8	7.5	0.827
Q80SY5	Pre-mRNA-splicing factor 38B OS=Mus musculus GN=Prpf38b PE=1 SV=1 - [PR38B_MOUSE]	32.11	0.0221	1	1	1	1	542	63.7	10.54	1.292
Q9DAW6	U4/U6 small nuclear ribonucleoprotein Prp4 OS=Mus musculus GN=Prpf4 PE=2 SV=1 - [PRP4_MOUSE]	100.3	0.0845	1	3	3	6	521	58.3	7.28	1.203
Q9CWH6	Proteasome subunit alpha type-7-like OS=Mus musculus GN=Psma8 PE=2 SV=1 - [PSA7L_MOUSE]	178.69	0.276	1	1	5	20	250	27.8	8.69	1.253
P0C7N9	Proteasome assembly chaperone 4 OS=Mus musculus GN=Psmg4 PE=1 SV=1 - [PSMG4_MOUSE]	83.48	0.3333	1	2	2	3	123	14	6.15	1.457
P54830	Tyrosine-protein phosphatase non-receptor type 5 OS=Mus musculus GN=Ptpn5 PE=2 SV=2 - [PTN5_MOUSE]	18.33	0.0148	1	1	1	1	541	60.8	5.2	1.662
O54724	Polymerase I and transcript release factor OS=Mus musculus GN=Ptrf PE=1 SV=1 - [PTRF_MOUSE]	349.1	0.2679	1	8	8	24	392	43.9	5.52	1.201
Q9Z0F6	Cell cycle checkpoint control protein RAD9A OS=Mus musculus GN=Rad9a PE=1 SV=1 - [RAD9A_MOUSE]	40.29	0.0308	1	1	1	1	389	42	5.72	1.252
Q8K342	Ras association domain-containing protein 9 OS=Mus musculus GN=Rassf9 PE=2 SV=1 - [RASF9_MOUSE]	14.38	0.0207	1	1	1	2	435	49.6	5.34	1.215
Q8CGC6	RNA-binding protein 28 OS=Mus musculus GN=Rbm28 PE=1 SV=4 - [RBM28_MOUSE]	129.44	0.072	1	4	4	5	750	84.2	9.54	0.815
Q91W59	RNA-binding motif, single-stranded-interacting protein 1 OS=Mus musculus GN=Rbms1 PE=2 SV=1 - [RBMS1_MOUSE]	43.41	0.0372	2	1	1	1	403	44	8.66	0.786
Q9JJT0	RNA 3'-terminal phosphate cyclase-like protein OS=Mus musculus GN=Rcl1 PE=2 SV=1 - [RCL1_MOUSE]	26.6	0.0322	1	1	1	1	373	40.8	9.26	1.308
P54726	UV excision repair protein RAD23 homolog A OS=Mus musculus GN=Rad23a PE=1 SV=2 - [RD23A_MOUSE]	79.9	0.0937	1	1	3	5	363	39.7	4.58	1.279
Q3TIR3	Synembryn-A OS=Mus musculus GN=Ric8a PE=1 SV=2 - [RIC8A_MOUSE]	45.34	0.0321	2	1	2	3	530	59.8	5.68	1.226
P53026	60S ribosomal protein L10a OS=Mus musculus GN=Rpl10a PE=1 SV=3 - [RL10A_MOUSE]	348.9	0.3963	1	10	10	44	217	24.9	9.98	0.797
P19253	60S ribosomal protein L13a OS=Mus musculus GN=Rpl13a PE=1 SV=4 - [RL13A_MOUSE]	230.55	0.2808	1	7	7	22	203	23.4	11.02	0.714
P47963	60S ribosomal protein L13 OS=Mus musculus GN=Rpl13 PE=2 SV=3 - [RL13_MOUSE]	485.85	0.5024	1	12	12	36	211	24.3	11.55	0.612
Q9CR57	60S ribosomal protein L14 OS=Mus musculus GN=Rpl14 PE=2 SV=3 - [RL14_MOUSE]	186.04	0.1843	1	4	4	9	217	23.5	11.02	0.75
Q9CPR4	60S ribosomal protein L17 OS=Mus musculus GN=Rpl17 PE=2 SV=3 - [RL17_MOUSE]	310.5	0.4293	1	9	10	45	184	21.4	10.18	0.696
P62717	60S ribosomal protein L18a OS=Mus musculus GN=Rpl18a PE=2 SV=1 - [RL18A_MOUSE]	262.07	0.4602	1	9	9	18	176	20.7	10.71	0.649
Q9D7S7	60S ribosomal protein L22-like 1 OS=Mus musculus GN=Rpl22l1 PE=1 SV=1 - [RL22L_MOUSE]	97.93	0.3934	1	3	3	5	122	14.5	9.45	0.802
P14115	60S ribosomal protein L27a OS=Mus musculus GN=Rpl27a PE=2 SV=5 - [RL27A_MOUSE]	319.63	0.3919	1	8	8	39	148	16.6	11.12	0.765
P41105	60S ribosomal protein L28 OS=Mus musculus GN=Rpl28 PE=1 SV=2 - [RL28_MOUSE]	179.52	0.3869	1	7	7	14	137	15.7	12.02	0.581
P47915	60S ribosomal protein L29 OS=Mus musculus GN=Rpl29 PE=2 SV=2 - [RL29_MOUSE]	84.75	0.125	1	3	3	12	160	17.6	11.84	0.582
Q9D1R9	60S ribosomal protein L34 OS=Mus musculus GN=Rpl34 PE=3 SV=2 - [RL34_MOUSE]	100.38	0.2051	1	3	3	7	117	13.3	11.47	0.68
O55142	60S ribosomal protein L35a OS=Mus musculus GN=Rpl35a PE=2 SV=2 - [RL35A_MOUSE]	70.62	0.2091	1	3	3	4	110	12.5	10.89	0.649
Q6ZWV7	60S ribosomal protein L35 OS=Mus musculus GN=Rpl35 PE=2 SV=1 - [RL35_MOUSE]	56.82	0.2602	1	3	3	4	123	14.5	11.05	0.657
P47964	60S ribosomal protein L36 OS=Mus musculus GN=Rpl36 PE=2 SV=2 - [RL36_MOUSE]	125.51	0.2476	2	3	4	16	105	12.2	11.34	0.781
Q9JJI8	60S ribosomal protein L38 OS=Mus musculus GN=Rpl38 PE=2 SV=3 - [RL38_MOUSE]	87.72	0.3429	1	3	3	19	70	8.2	10.1	0.802
P27659	60S ribosomal protein L3 OS=Mus musculus GN=Rpl3 PE=1 SV=3 - [RL3_MOUSE]	521.86	0.4342	1	17	17	36	403	46.1	10.21	0.79
Q9D8E6	60S ribosomal protein L4 OS=Mus musculus GN=Rpl4 PE=1 SV=3 - [RL4_MOUSE]	696.39	0.4535	1	21	21	99	419	47.1	11	0.704
P47962	60S ribosomal protein L5 OS=Mus musculus GN=Rpl5 PE=1 SV=3 - [RL5_MOUSE]	400.76	0.404	1	12	12	45	297	34.4	9.77	0.81
P47911	60S ribosomal protein L6 OS=Mus musculus GN=Rpl6 PE=1 SV=3 - [RL6_MOUSE]	330.43	0.2973	1	9	9	35	296	33.5	10.7	0.65
P12970	60S ribosomal protein L7a OS=Mus musculus GN=Rpl7a PE=2 SV=2 - [RL7A_MOUSE]	349.79	0.4173	1	11	11	25	266	30	10.56	0.674
P14148	60S ribosomal protein L7 OS=Mus musculus GN=Rpl7 PE=2 SV=2 - [RL7_MOUSE]	281.21	0.3815	1	9	9	24	270	31.4	10.89	0.771
P51410	60S ribosomal protein L9 OS=Mus musculus GN=Rpl9 PE=2 SV=2 - [RL9_MOUSE]	235.69	0.2917	1	5	5	16	192	21.9	9.95	0.748
P14869	60S acidic ribosomal protein P0 OS=Mus musculus GN=Rplp0 PE=1 SV=3 - [RLA0_MOUSE]	559.36	0.4448	1	11	11	71	317	34.2	6.25	0.821
P56183	Ribosomal RNA processing protein 1 homolog A OS=Mus musculus GN=Rrp1 PE=2 SV=2 - [RRP1_MOUSE]	78.95	0.083	1	2	2	3	494	54.7	5.17	1.204
P63325	40S ribosomal protein S10 OS=Mus musculus GN=Rps10 PE=1 SV=1 - [RS10_MOUSE]	205.8	0.3758	1	7	7	33	165	18.9	10.15	0.815
P63323	40S ribosomal protein S12 OS=Mus musculus GN=Rps12 PE=1 SV=2 - [RS12_MOUSE]	198.12	0.4242	1	5	5	32	132	14.5	7.24	0.832
P63276	40S ribosomal protein S17 OS=Mus musculus GN=Rps17 PE=1 SV=2 - [RS17_MOUSE]	317.82	0.5037	1	7	7	42	135	15.5	9.85	0.824
Q9CZX8	40S ribosomal protein S19 OS=Mus musculus GN=Rps19 PE=1 SV=3 - [RS19_MOUSE]	370.08	0.4966	1	10	10	47	145	16.1	10.4	0.708
Q9CQR2	40S ribosomal protein S21 OS=Mus musculus GN=Rps21 PE=2 SV=1 - [RS21_MOUSE]	186.62	0.494	1	5	5	15	83	9.1	8.51	0.772
P62274	40S ribosomal protein S29 OS=Mus musculus GN=Rps29 PE=2 SV=2 - [RS29_MOUSE]	36.84	0.3393	1	2	2	3	56	6.7	10.13	0.802
P25444	40S ribosomal protein S2 OS=Mus musculus GN=Rps2 PE=2 SV=3 - [RS2_MOUSE]	589.4	0.5188	1	15	15	56	293	31.2	10.24	0.74
P97351	40S ribosomal protein S3a OS=Mus musculus GN=Rps3a PE=1 SV=3 - [RS3A_MOUSE]	714.1	0.625	1	22	22	88	264	29.9	9.73	0.794
P62908	40S ribosomal protein S3 OS=Mus musculus GN=Rps3 PE=1 SV=1 - [RS3_MOUSE]	704.34	0.7737	1	18	18	95	243	26.7	9.66	0.808
Q68FF9	3-oxo-5-alpha-steroid 4-dehydrogenase 1 OS=Mus musculus GN=Srd5a1 PE=2 SV=2 - [S5A1_MOUSE]	67.82	0.0314	1	2	2	2	255	29.3	8.63	0.8
Q7TPE5	Probable RNA polymerase II nuclear localization protein SLC7A6OS OS=Mus musculus GN=Slc7a6os PE=1 SV=1 - [S7A6O_MOUSE]	64.83	0.085	1	2	2	3	306	35	4.58	1.281
D3YXK2	Scaffold attachment factor B1 OS=Mus musculus GN=Safb PE=1 SV=2 - [SAFB1_MOUSE]	148.61	0.0576	2	4	4	9	937	105	5.35	1.21
P59808	SAM and SH3 domain-containing protein 1 OS=Mus musculus GN=Sash1 PE=1 SV=1 - [SASH1_MOUSE]	27.83	0.0106	1	1	1	1	1230	135.5	6.2	1.344
Q8VHE0	Translocation protein SEC63 homolog OS=Mus musculus GN=Sec63 PE=2 SV=4 - [SEC63_MOUSE]	43.75	0.0237	1	1	1	1	760	87.8	5.38	1.204
Q921H9	Sel1 repeat-containing protein 1 OS=Mus musculus GN=Selrc1 PE=2 SV=1 - [SELR1_MOUSE]	32.26	0.0433	1	1	1	1	231	25.6	6.29	1.508
Q62181	Semaphorin-3C OS=Mus musculus GN=Sema3c PE=1 SV=2 - [SEM3C_MOUSE]	53.58	0.0293	1	2	2	2	751	85.2	8.65	0.725
Q80YS9	Probable inactive protein kinase-like protein SgK071 homolog OS=Mus musculus GN=Sgk071 PE=2 SV=3 - [SGK71_MOUSE]	36.62	0.0121	1	1	1	1	662	74.8	4.97	1.321
Q8CI08	SLAIN motif-containing protein 2 OS=Mus musculus GN=Slain2 PE=1 SV=2 - [SLAI2_MOUSE]	76.87	0.0534	1	2	2	2	581	62.3	9.47	1.246
Q3TIX9	U4/U6.U5 tri-snRNP-associated protein 2 OS=Mus musculus GN=Usp39 PE=2 SV=2 - [SNUT2_MOUSE]	57.13	0.0319	1	2	2	2	564	65.1	8.9	1.215
Q6NZL0	Protein SOGA3 OS=Mus musculus GN=Soga3 PE=2 SV=2 - [SOGA3_MOUSE]	52.59	0.0296	1	2	2	2	945	103.4	6.14	1.291
Q7TME2	Sperm-associated antigen 5 OS=Mus musculus GN=Spag5 PE=2 SV=1 - [SPAG5_MOUSE]	13.15	0.0103	1	1	1	1	1165	129.9	4.96	1.206
Q8BGQ1	Spermatogenesis-defective protein 39 homolog OS=Mus musculus GN=Vipas39 PE=1 SV=1 - [SPE39_MOUSE]	30.89	0.0265	1	1	1	1	491	56.6	7.17	1.208
Q8JZX4	Splicing factor 45 OS=Mus musculus GN=Rbm17 PE=1 SV=1 - [SPF45_MOUSE]	141.38	0.0765	1	3	3	6	405	45.3	5.82	1.284
Q91YU8	Suppressor of SWI4 1 homolog OS=Mus musculus GN=Ppan PE=2 SV=2 - [SSF1_MOUSE]	21.94	0.0362	1	1	1	1	470	52.7	10.32	0.784
Q8C2E7	WASH complex subunit strumpellin OS=Mus musculus GN=Kiaa0196 PE=2 SV=2 - [STRUM_MOUSE]	17.18	0.0138	1	1	1	1	1159	134	7.12	1.232
P70279	Surfeit locus protein 6 OS=Mus musculus GN=Surf6 PE=2 SV=1 - [SURF6_MOUSE]	65.81	0.0761	1	3	3	5	355	41.2	10.52	0.822
Q14CH7	Alanine--tRNA ligase, mitochondrial OS=Mus musculus GN=Aars2 PE=2 SV=1 - [SYAM_MOUSE]	33.68	0.0112	1	1	1	2	980	106.7	6.18	0.813
Q3UQ84	Threonine--tRNA ligase, mitochondrial OS=Mus musculus GN=Tars2 PE=2 SV=1 - [SYTM_MOUSE]	20.35	0.0124	1	1	1	1	723	81.6	7.87	0.83
Q8BYL4	Tyrosine--tRNA ligase, mitochondrial OS=Mus musculus GN=Yars2 PE=1 SV=2 - [SYYM_MOUSE]	101.52	0.1038	1	3	3	3	472	52.6	9.16	1.229
Q9R1Q6	Transmembrane protein 176B OS=Mus musculus GN=Tmem176b PE=1 SV=1 - [T176B_MOUSE]	101.94	0.1331	1	3	3	7	263	28.3	7.84	0.678
Q9D0D5	General transcription factor IIE subunit 1 OS=Mus musculus GN=Gtf2e1 PE=2 SV=1 - [T2EA_MOUSE]	131.29	0.175	1	6	6	9	440	49.6	4.86	1.21
Q8K0F1	TBC1 domain family member 23 OS=Mus musculus GN=Tbc1d23 PE=2 SV=1 - [TBC23_MOUSE]	46.58	0.0102	1	1	1	1	684	76.4	5.36	1.256
Q5SSZ5	Tensin-3 OS=Mus musculus GN=Tns3 PE=1 SV=1 - [TENS3_MOUSE]	186.15	0.0299	2	5	5	8	1440	155.5	6.65	0.819
Q99PM3	Transcription initiation factor IIA subunit 1 OS=Mus musculus GN=Gtf2a1 PE=2 SV=2 - [TF2AA_MOUSE]	29.67	0.0185	1	1	1	1	378	41.6	4.55	1.407
Q8BMQ2	General transcription factor 3C polypeptide 4 OS=Mus musculus GN=Gtf3c4 PE=2 SV=2 - [TF3C4_MOUSE]	113.64	0.0563	1	3	3	3	817	91.6	6.73	1.263
Q08639	Transcription factor Dp-1 OS=Mus musculus GN=Tfdp1 PE=1 SV=1 - [TFDP1_MOUSE]	67.73	0.0366	1	1	1	2	410	45.2	6.1	1.343
Q9WUH1	Transmembrane protein 115 OS=Mus musculus GN=Tmem115 PE=1 SV=1 - [TM115_MOUSE]	39	0.0486	1	1	1	2	350	38.1	7.5	1.318
B9EKI3	TATA element modulatory factor OS=Mus musculus GN=Tmf1 PE=1 SV=2 - [TMF1_MOUSE]	59.22	0.022	1	2	2	2	1091	121.7	4.87	0.731
Q9JKK7	Tropomodulin-2 OS=Mus musculus GN=Tmod2 PE=1 SV=2 - [TMOD2_MOUSE]	52.6	0.0427	1	1	2	4	351	39.5	5.35	1.266
Q9CQN3	Mitochondrial import receptor subunit TOM6 homolog OS=Mus musculus GN=Tomm6 PE=3 SV=1 - [TOM6_MOUSE]	33.36	0.1892	1	1	1	2	74	7.9	4.89	1.235
P58771	Tropomyosin alpha-1 chain OS=Mus musculus GN=Tpm1 PE=1 SV=1 - [TPM1_MOUSE]	721.55	0.5211	1	12	21	118	284	32.7	4.74	0.793
P39429	TNF receptor-associated factor 2 OS=Mus musculus GN=Traf2 PE=1 SV=1 - [TRAF2_MOUSE]	52.59	0.016	1	1	1	2	501	56	6.96	1.293
Q61510	E3 ubiquitin/ISG15 ligase TRIM25 OS=Mus musculus GN=Trim25 PE=1 SV=2 - [TRI25_MOUSE]	92.04	0.0584	1	3	3	6	634	71.7	8.28	1.255
Q9CQ88	Tetraspanin-31 OS=Mus musculus GN=Tspan31 PE=1 SV=1 - [TSN31_MOUSE]	44.91	0.0905	2	2	2	3	210	22.7	8.44	1.218
Q9D4B2	Tetratricopeptide repeat protein 25 OS=Mus musculus GN=Ttc25 PE=2 SV=3 - [TTC25_MOUSE]	30.5	0.0128	1	1	1	1	624	71.5	6.65	1.362
Q5NC05	Transcription termination factor 2 OS=Mus musculus GN=Ttf2 PE=1 SV=2 - [TTF2_MOUSE]	22.64	0.0105	1	1	1	2	1138	125.5	8.9	1.245
P63147	Ubiquitin-conjugating enzyme E2 B OS=Mus musculus GN=Ube2b PE=1 SV=1 - [UBE2B_MOUSE]	39.18	0.1908	1	2	2	2	152	17.3	5.01	1.201
Q5BKP2	Ubiquitin carboxyl-terminal hydrolase 13 OS=Mus musculus GN=Usp13 PE=2 SV=1 - [UBP13_MOUSE]	23.37	0.0105	1	1	1	2	858	96.7	5.53	1.512
Q3UJD6	Ubiquitin carboxyl-terminal hydrolase 19 OS=Mus musculus GN=Usp19 PE=2 SV=1 - [UBP19_MOUSE]	146.03	0.0449	1	4	4	5	1360	150.5	6.38	1.233
Q8VDF2	E3 ubiquitin-protein ligase UHRF1 OS=Mus musculus GN=Uhrf1 PE=1 SV=2 - [UHRF1_MOUSE]	12.01	0.0179	1	1	1	1	782	88.2	8.31	1.516
Q9R1Q9	V-type proton ATPase subunit S1 OS=Mus musculus GN=Atp6ap1 PE=1 SV=1 - [VAS1_MOUSE]	45.94	0.0367	1	2	2	2	463	51	5.92	1.221
P29533	Vascular cell adhesion protein 1 OS=Mus musculus GN=Vcam1 PE=1 SV=1 - [VCAM1_MOUSE]	77.79	0.0338	1	2	2	3	739	81.3	5.3	0.826
P98156	Very low-density lipoprotein receptor OS=Mus musculus GN=Vldlr PE=1 SV=1 - [VLDLR_MOUSE]	58.9	0.0298	1	2	2	2	873	96.3	4.78	0.806
Q9D2N9	Vacuolar protein sorting-associated protein 33A OS=Mus musculus GN=Vps33a PE=1 SV=2 - [VP33A_MOUSE]	10.29	0.0151	1	1	1	1	598	67.5	7.08	1.227
Q8BJH1	Zinc finger C2HC domain-containing protein 1A OS=Mus musculus GN=Zc2hc1a PE=2 SV=1 - [ZC21A_MOUSE]	88.49	0.1296	1	4	4	5	324	35.1	9.88	0.832
Q922H9	Zinc finger protein 330 OS=Mus musculus GN=Znf330 PE=2 SV=1 - [ZN330_MOUSE]	91.68	0.0823	1	2	2	3	316	35.6	6.16	1.279
Q8R1N0	Zinc finger protein 830 OS=Mus musculus GN=Znf830 PE=1 SV=1 - [ZN830_MOUSE]	50.49	0.0606	1	1	1	1	363	40.6	5.4	1.238
P97347	Repetin OS=Mus musculus GN=Rptn PE=2 SV=2 - [RPTN_MOUSE]	20.35	0.0107	1	1	1	1	1118	128.5	7.61	0.713
Q3TN34	MICAL-like protein 2 OS=Mus musculus GN=Micall2 PE=1 SV=1 - [MILK2_MOUSE]	85.16	0.0416	1	2	3	4	1009	108.2	9.55	0.802
Q9WVB0	RNA-binding protein with multiple splicing OS=Mus musculus GN=Rbpms PE=2 SV=2 - [RBPMS_MOUSE]	213.07	0.3706	2	6	6	14	197	21.8	8.07	0.67
Q9QYX7	Protein piccolo OS=Mus musculus GN=Pclo PE=1 SV=4 - [PCLO_MOUSE]	18.31	0.0018	1	1	1	6	5068	550.5	6.51	4.96
E9QAM5	Helicase with zinc finger domain 2 OS=Mus musculus GN=Helz2 PE=1 SV=1 - [HELZ2_MOUSE]	28.2	0.0085	1	2	2	2	2947	331.4	8.07	1.241
